# Supplementary material for: Identification of the molecular subtypes and construction of risk models in neuroblastoma
Source: PubMed Central journal article supplement (PMC10362029; doi:10.1038/s41598-023-35401-3), 2023-07-21
Supplement: 41598_2023_35401_MOESM1_ESM.pdf [file 41598_2023_35401_MOESM1_ESM.pdf]

## Result of Neuralnetwork gene in GDSC

| Symbol    | Drug               | Cor      | Fdr      | Entrez |
|-----------|--------------------|----------|----------|--------|
| ARHGAP11A | (5Z)-7-Oxozeaenol  | 0.093418 | 0.015583 | 9824   |
| ARHGAP11A | 17-AAG             | 0.082695 | 0.02693  | 9824   |
| ARHGAP11A | 5-Fluorouracil     | -0.08021 | 0.028157 | 9824   |
| ARHGAP11A | 681640             | -0.04514 | 0.458381 | 9824   |
| ARHGAP11A | A-443654           | -0.0307  | 0.88938  | 9824   |
| ARHGAP11A | A-770041           | -0.0631  | 0.44017  | 9824   |
| ARHGAP11A | AC220              | -0.06634 | 0.137105 | 9824   |
| ARHGAP11A | AG-014699          | 0.057145 | 0.17744  | 9824   |
| ARHGAP11A | AICAR              | -0.15583 | 3.58E-05 | 9824   |
| ARHGAP11A | AKT inhibitor VIII | 0.101246 | 0.015882 | 9824   |
| ARHGAP11A | AMG-706            | 0.03555  | 0.578023 | 9824   |
| ARHGAP11A | AP-24534           | -0.11567 | 0.002752 | 9824   |
| ARHGAP11A | AR-42              | -0.14692 | 2.77E-05 | 9824   |
| ARHGAP11A | AS601245           | 0.031469 | 0.589628 | 9824   |
| ARHGAP11A | AS605240           | -0.02107 | 0.665924 | 9824   |
| ARHGAP11A | AT-7519            | -0.17038 | 8.68E-07 | 9824   |
| ARHGAP11A | ATRA               | -0.0721  | 0.115502 | 9824   |
| ARHGAP11A | AUY922             | 0.000183 | 0.998203 | 9824   |
| ARHGAP11A | AZ628              | 0.122535 | 0.070352 | 9824   |
| ARHGAP11A | AZD6482            | 0.016227 | 0.778989 | 9824   |
| ARHGAP11A | AZD7762            | -0.20305 | 4.21E-08 | 9824   |
| ARHGAP11A | AZD8055            | -0.11148 | 0.003667 | 9824   |
| ARHGAP11A | Afatinib           | 0.115697 | 0.001234 | 9824   |
| ARHGAP11A | Axitinib           | -0.09038 | 0.050238 | 9824   |
| ARHGAP11A | BAY 61-3606        | -0.08686 | 0.028865 | 9824   |
| ARHGAP11A | BEZ235             | -0.00591 | 0.925496 | 9824   |
| ARHGAP11A | BHG712             | -0.1242  | 0.000449 | 9824   |
| ARHGAP11A | BI-2536            | -0.14488 | 0.096431 | 9824   |
| ARHGAP11A | BIRB 0796          | 0.039737 | 0.454644 | 9824   |
| ARHGAP11A | BIX02189           | -0.14161 | 6.14E-05 | 9824   |
| ARHGAP11A | BMS-509744         | 0.020561 | 0.851224 | 9824   |
| ARHGAP11A | BMS-536924         | 0.004785 | 0.961099 | 9824   |
| ARHGAP11A | BMS-708163         | 0.117321 | 0.002286 | 9824   |
| ARHGAP11A | BMS-754807         | 0.075292 | 0.13254  | 9824   |
| ARHGAP11A | BMS345541          | -0.19118 | 3.07E-08 | 9824   |
| ARHGAP11A | BX-795             | -0.15615 | 7.5E-05  | 9824   |
| ARHGAP11A | BX-912             | -0.19912 | 5.77E-09 | 9824   |
| ARHGAP11A | Belinostat         | -0.12602 | 0.000499 | 9824   |
| ARHGAP11A | Bexarotene         | 0.001363 | 0.989919 | 9824   |
| ARHGAP11A | Bicalutamide       | 0.010602 | 0.845463 | 9824   |
| ARHGAP11A | Bleomycin          | 0.040629 | 0.47618  | 9824   |
| ARHGAP11A | Bleomycin (50 uM)  | 0.052519 | 0.157581 | 9824   |
| ARHGAP11A | Bortezomib         | 0.010121 | 0.925277 | 9824   |
| ARHGAP11A | Bosutinib          | -0.12629 | 0.003265 | 9824   |
| ARHGAP11A | Bryostatins 1      | 0.06591  | 0.179507 | 9824   |
| ARHGAP11A | CAL-101            | -0.09131 | 0.013451 | 9824   |
| ARHGAP11A | CAY10603           | -0.15832 | 5.52E-06 | 9824   |
| ARHGAP11A | CCT007093          | 0.105935 | 0.008857 | 9824   |

|           |              |          |          |      |
|-----------|--------------|----------|----------|------|
| ARHGAP11A | CCT018159    | -0.04341 | 0.404289 | 9824 |
| ARHGAP11A | CEP-701      | -0.14584 | 0.000122 | 9824 |
| ARHGAP11A | CGP-082996   | -0.03726 | 0.731975 | 9824 |
| ARHGAP11A | CGP-60474    | -0.00515 | 0.96579  | 9824 |
| ARHGAP11A | CH5424802    | -0.08242 | 0.093902 | 9824 |
| ARHGAP11A | CHIR-99021   | 0.05167  | 0.18521  | 9824 |
| ARHGAP11A | CI-1040      | 0.072947 | 0.084734 | 9824 |
| ARHGAP11A | CMK          | -0.02429 | 0.863898 | 9824 |
| ARHGAP11A | CP466722     | -0.17943 | 2.04E-07 | 9824 |
| ARHGAP11A | CP724714     | 0.079992 | 0.088055 | 9824 |
| ARHGAP11A | CUDC-101     | -0.15351 | 1.55E-05 | 9824 |
| ARHGAP11A | CX-5461      | -0.13067 | 0.000245 | 9824 |
| ARHGAP11A | Camptothecin | -0.12203 | 0.002107 | 9824 |
| ARHGAP11A | Cetuximab    | 0.092891 | 0.018281 | 9824 |
| ARHGAP11A | Cisplatin    | 0.002922 | 0.965286 | 9824 |
| ARHGAP11A | Crizotinib   | -0.1416  | 0.121024 | 9824 |
| ARHGAP11A | Cyclopamine  | -0.04965 | 0.663175 | 9824 |
| ARHGAP11A | Cytarabine   | -0.0756  | 0.105074 | 9824 |
| ARHGAP11A | DMOG         | -0.11713 | 0.003586 | 9824 |
| ARHGAP11A | Dabrafenib   | 0.121241 | 0.001871 | 9824 |
| ARHGAP11A | Dasatinib    | 0.001261 | 0.98705  | 9824 |
| ARHGAP11A | Docetaxel    | 0.023376 | 0.560482 | 9824 |
| ARHGAP11A | Doxorubicin  | 0.011558 | 0.889575 | 9824 |
| ARHGAP11A | EHT 1864     | 0.051339 | 0.411207 | 9824 |
| ARHGAP11A | EKB-569      | -0.09081 | 0.018713 | 9824 |
| ARHGAP11A | EX-527       | 0.001048 | 0.994028 | 9824 |
| ARHGAP11A | Elesclomol   | -0.03672 | 0.433695 | 9824 |
| ARHGAP11A | Embelin      | 0.005967 | 0.944775 | 9824 |
| ARHGAP11A | Epothilone B | -0.01216 | 0.847191 | 9824 |
| ARHGAP11A | Erlotinib    | 0.100186 | 0.160685 | 9824 |
| ARHGAP11A | Etoposide    | -0.08148 | 0.061897 | 9824 |
| ARHGAP11A | FH535        | 0.091028 | 0.035263 | 9824 |
| ARHGAP11A | FK866        | -0.19131 | 3.89E-08 | 9824 |
| ARHGAP11A | FMK          | -0.06744 | 0.268619 | 9824 |
| ARHGAP11A | FR-180204    | 0.004448 | 0.954617 | 9824 |
| ARHGAP11A | FTI-277      | 0.118708 | 0.002577 | 9824 |
| ARHGAP11A | Foretinib    | -0.15615 | 2.12E-05 | 9824 |
| ARHGAP11A | GDC0449      | 0.00552  | 0.971221 | 9824 |
| ARHGAP11A | GDC0941      | -0.05268 | 0.325564 | 9824 |
| ARHGAP11A | GNF-2        | -0.06438 | 0.776567 | 9824 |
| ARHGAP11A | GSK-650394   | -0.04003 | 0.589008 | 9824 |
| ARHGAP11A | GSK1070916   | -0.1982  | 1.36E-08 | 9824 |
| ARHGAP11A | GSK1904529A  | 0.064198 | 0.150429 | 9824 |
| ARHGAP11A | GSK2126458   | -0.10159 | 0.005573 | 9824 |
| ARHGAP11A | GSK269962A   | -0.04175 | 0.430048 | 9824 |
| ARHGAP11A | GSK429286A   | -0.12365 | 0.00106  | 9824 |
| ARHGAP11A | GSK690693    | -0.13358 | 0.000177 | 9824 |
| ARHGAP11A | GW 441756    | -0.02916 | 0.896458 | 9824 |
| ARHGAP11A | GW-2580      | 0.032296 | 0.938845 | 9824 |
| ARHGAP11A | GW843682X    | -0.16685 | 0.02286  | 9824 |

|           |                    |          |          |      |
|-----------|--------------------|----------|----------|------|
| ARHGAP11A | Gefitinib          | 0.085952 | 0.033231 | 9824 |
| ARHGAP11A | Gemcitabine        | -0.09433 | 0.033276 | 9824 |
| ARHGAP11A | Genentech Cpd 10   | -0.18448 | 1.17E-07 | 9824 |
| ARHGAP11A | HG-5-113-01        | -0.13969 | 0.021947 | 9824 |
| ARHGAP11A | HG-5-88-01         | 0.020184 | 0.917421 | 9824 |
| ARHGAP11A | HG-6-64-1          | -0.02923 | 0.578708 | 9824 |
| ARHGAP11A | I-BET-762          | -0.16009 | 3.07E-06 | 9824 |
| ARHGAP11A | IOX2               | 0.025887 | 0.688232 | 9824 |
| ARHGAP11A | IPA-3              | -0.08585 | 0.026568 | 9824 |
| ARHGAP11A | Imatinib           | -0.08175 | 0.516345 | 9824 |
| ARHGAP11A | Ispinesib Mesylate | -0.17107 | 1E-06    | 9824 |
| ARHGAP11A | JNJ-26854165       | 0.007716 | 0.91014  | 9824 |
| ARHGAP11A | JNK Inhibitor VIII | 0.067525 | 0.108752 | 9824 |
| ARHGAP11A | JNK-9L             | -0.0068  | 0.932252 | 9824 |
| ARHGAP11A | JQ1                | 0.006875 | 0.900952 | 9824 |
| ARHGAP11A | JQ12               | 0.005576 | 0.93728  | 9824 |
| ARHGAP11A | JW-7-24-1          | -0.11639 | 0.00097  | 9824 |
| ARHGAP11A | JW-7-52-1          | -0.02096 | 0.869312 | 9824 |
| ARHGAP11A | KIN001-055         | -0.00481 | 0.959288 | 9824 |
| ARHGAP11A | KIN001-102         | -0.14309 | 3.89E-05 | 9824 |
| ARHGAP11A | KIN001-135         | 0.087333 | 0.355628 | 9824 |
| ARHGAP11A | KIN001-236         | -0.10145 | 0.005254 | 9824 |
| ARHGAP11A | KIN001-244         | -0.11775 | 0.001032 | 9824 |
| ARHGAP11A | KIN001-260         | -0.1044  | 0.003553 | 9824 |
| ARHGAP11A | KIN001-266         | -0.04962 | 0.297283 | 9824 |
| ARHGAP11A | KIN001-270         | -0.13816 | 0.000187 | 9824 |
| ARHGAP11A | KU-55933           | -0.09815 | 0.047995 | 9824 |
| ARHGAP11A | LAQ824             | -0.07517 | 0.055512 | 9824 |
| ARHGAP11A | LFM-A13            | 0.112687 | 0.012324 | 9824 |
| ARHGAP11A | LY317615           | -0.0983  | 0.015026 | 9824 |
| ARHGAP11A | Lapatinib          | 0.146824 | 0.014828 | 9824 |
| ARHGAP11A | Lenalidomide       | -0.06464 | 0.314171 | 9824 |
| ARHGAP11A | Linifanib          | -0.06143 | 0.201206 | 9824 |
| ARHGAP11A | Lisitinib          | 0.055248 | 0.359286 | 9824 |
| ARHGAP11A | MG-132             | 0.030952 | 0.770972 | 9824 |
| ARHGAP11A | MK-2206            | -0.07858 | 0.102022 | 9824 |
| ARHGAP11A | MLN4924            | 0.026959 | 0.66719  | 9824 |
| ARHGAP11A | MP470              | -0.04281 | 0.33305  | 9824 |
| ARHGAP11A | MPS-1-IN-1         | -0.09449 | 0.010571 | 9824 |
| ARHGAP11A | MS-275             | -0.12785 | 0.076006 | 9824 |
| ARHGAP11A | Masitinib          | -0.09538 | 0.009609 | 9824 |
| ARHGAP11A | Methotrexate       | -0.17194 | 1.67E-06 | 9824 |
| ARHGAP11A | Midostaurin        | 0.006621 | 0.904833 | 9824 |
| ARHGAP11A | Mitomycin C        | -0.0619  | 0.203193 | 9824 |
| ARHGAP11A | NG-25              | -0.17122 | 7.9E-07  | 9824 |
| ARHGAP11A | NPK76-II-72-1      | -0.25153 | 6.76E-14 | 9824 |
| ARHGAP11A | NSC-207895         | -0.11396 | 0.004412 | 9824 |
| ARHGAP11A | NSC-87877          | 0.125817 | 0.01191  | 9824 |
| ARHGAP11A | NU-7441            | -0.03604 | 0.636493 | 9824 |
| ARHGAP11A | Navitoclax         | -0.1953  | 4.76E-08 | 9824 |

|           |                     |          |          |      |
|-----------|---------------------|----------|----------|------|
| ARHGAP11A | Nilotinib           | -0.0972  | 0.030346 | 9824 |
| ARHGAP11A | Nutlin-3a (-)       | 0.10426  | 0.014266 | 9824 |
| ARHGAP11A | OSI-027             | -0.11383 | 0.001394 | 9824 |
| ARHGAP11A | OSI-930             | -0.06199 | 0.111186 | 9824 |
| ARHGAP11A | OSU-03012           | -0.0224  | 0.691645 | 9824 |
| ARHGAP11A | Obatoclox Mesylate  | -0.02898 | 0.572917 | 9824 |
| ARHGAP11A | Olaparib            | 0.015976 | 0.750116 | 9824 |
| ARHGAP11A | PAC-1               | -0.0263  | 0.573977 | 9824 |
| ARHGAP11A | PD-0325901          | 0.152187 | 5.27E-05 | 9824 |
| ARHGAP11A | PD-0332991          | -0.05185 | 0.338565 | 9824 |
| ARHGAP11A | PD-173074           | 0.000853 | 0.996072 | 9824 |
| ARHGAP11A | PF-4708671          | 0.077285 | 0.358522 | 9824 |
| ARHGAP11A | PF-562271           | 0.004421 | 0.952536 | 9824 |
| ARHGAP11A | PFI-1               | 0.01711  | 0.762399 | 9824 |
| ARHGAP11A | PHA-665752          | 0.005785 | 0.977314 | 9824 |
| ARHGAP11A | PHA-793887          | -0.16393 | 1.86E-06 | 9824 |
| ARHGAP11A | PI-103              | -0.1359  | 0.000119 | 9824 |
| ARHGAP11A | PIK-93              | -0.18086 | 1.35E-07 | 9824 |
| ARHGAP11A | PLX4720             | 0.122652 | 0.00109  | 9824 |
| ARHGAP11A | Paclitaxel          | -0.05803 | 0.608264 | 9824 |
| ARHGAP11A | Parthenolide        | -0.06418 | 0.530152 | 9824 |
| ARHGAP11A | Pazopanib           | 0.045224 | 0.414301 | 9824 |
| ARHGAP11A | Phenformin          | -0.10842 | 0.002897 | 9824 |
| ARHGAP11A | Pyrimethamine       | -0.04961 | 0.678431 | 9824 |
| ARHGAP11A | QL-VIII-58          | -0.0175  | 0.858985 | 9824 |
| ARHGAP11A | QL-X-138            | -0.13013 | 0.000264 | 9824 |
| ARHGAP11A | QL-XI-92            | -0.13904 | 7.93E-05 | 9824 |
| ARHGAP11A | QL-XII-47           | -0.09153 | 0.017302 | 9824 |
| ARHGAP11A | QL-XII-61           | -0.10026 | 0.100046 | 9824 |
| ARHGAP11A | QS11                | -0.02337 | 0.746167 | 9824 |
| ARHGAP11A | RDEA119             | 0.174063 | 4.76E-07 | 9824 |
| ARHGAP11A | RO-3306             | -0.00728 | 0.882612 | 9824 |
| ARHGAP11A | Rapamycin           | -0.08112 | 0.453151 | 9824 |
| ARHGAP11A | Roscovitine         | 0.030727 | 0.882245 | 9824 |
| ARHGAP11A | Ruxolitinib         | -0.05545 | 0.255876 | 9824 |
| ARHGAP11A | S-Trityl-L-cysteine | -0.12314 | 0.093488 | 9824 |
| ARHGAP11A | SB 216763           | 0.006555 | 0.91105  | 9824 |
| ARHGAP11A | SB 505124           | 0.040994 | 0.586202 | 9824 |
| ARHGAP11A | SB52334             | 0.053835 | 0.243577 | 9824 |
| ARHGAP11A | SB590885            | 0.15857  | 9.12E-05 | 9824 |
| ARHGAP11A | SGC0946             | 0.080284 | 0.083447 | 9824 |
| ARHGAP11A | SL 0101-1           | 0.071959 | 0.324786 | 9824 |
| ARHGAP11A | SN-38               | -0.04373 | 0.335089 | 9824 |
| ARHGAP11A | SNX-2112            | -0.175   | 5.31E-07 | 9824 |
| ARHGAP11A | STF-62247           | -0.08446 | 0.031139 | 9824 |
| ARHGAP11A | Salubrinol          | -0.07346 | 0.379438 | 9824 |
| ARHGAP11A | Saracatinib         | -0.0838  | 0.300616 | 9824 |
| ARHGAP11A | Shikonin            | -0.0397  | 0.47001  | 9824 |
| ARHGAP11A | Sorafenib           | -0.08554 | 0.373454 | 9824 |
| ARHGAP11A | Sunitinib           | -0.14803 | 0.022232 | 9824 |

|           |              |          |          |      |
|-----------|--------------|----------|----------|------|
| ARHGAP11A | T0901317     | -0.08239 | 0.036873 | 9824 |
| ARHGAP11A | TAE684       | -0.07601 | 0.465305 | 9824 |
| ARHGAP11A | TAK-715      | -0.13882 | 8.35E-05 | 9824 |
| ARHGAP11A | TG101348     | -0.14725 | 2.4E-05  | 9824 |
| ARHGAP11A | TGX221       | 0.096533 | 0.12922  | 9824 |
| ARHGAP11A | THZ-2-102-1  | -0.15692 | 8E-06    | 9824 |
| ARHGAP11A | THZ-2-49     | -0.1297  | 0.000303 | 9824 |
| ARHGAP11A | TL-1-85      | -0.16263 | 3.05E-06 | 9824 |
| ARHGAP11A | TL-2-105     | -0.13333 | 0.000204 | 9824 |
| ARHGAP11A | TPCA-1       | -0.17336 | 4.61E-07 | 9824 |
| ARHGAP11A | TW 37        | -0.08816 | 0.03355  | 9824 |
| ARHGAP11A | Talazoparib  | 0.014619 | 0.781984 | 9824 |
| ARHGAP11A | Tamoxifen    | 0.029387 | 0.81836  | 9824 |
| ARHGAP11A | Temozolomide | -0.021   | 0.803411 | 9824 |
| ARHGAP11A | Temsirolimus | -0.09506 | 0.0284   | 9824 |
| ARHGAP11A | Thapsigargin | -0.03016 | 0.675294 | 9824 |
| ARHGAP11A | Tipifarnib   | 0.012206 | 0.889332 | 9824 |
| ARHGAP11A | Tivozanib    | -0.04065 | 0.491313 | 9824 |
| ARHGAP11A | Trametinib   | 0.196053 | 2.26E-08 | 9824 |
| ARHGAP11A | Tubastatin A | -0.13677 | 9.41E-05 | 9824 |
| ARHGAP11A | UNC0638      | -0.09416 | 0.007293 | 9824 |
| ARHGAP11A | UNC1215      | 0.089948 | 0.047297 | 9824 |
| ARHGAP11A | VNLG/124     | -0.05286 | 0.204246 | 9824 |
| ARHGAP11A | VX-11e       | 0.066473 | 0.139476 | 9824 |
| ARHGAP11A | VX-680       | -0.13367 | 0.092521 | 9824 |
| ARHGAP11A | VX-702       | -0.02131 | 0.934547 | 9824 |
| ARHGAP11A | Veliparib    | -0.02195 | 0.778334 | 9824 |
| ARHGAP11A | Vinblastine  | -0.15177 | 0.000112 | 9824 |
| ARHGAP11A | Vinorelbine  | -0.06203 | 0.229799 | 9824 |
| ARHGAP11A | Vorinostat   | -0.19684 | 3.34E-08 | 9824 |
| ARHGAP11A | WH-4-023     | 0.012407 | 0.897452 | 9824 |
| ARHGAP11A | WZ-1-84      | -0.00857 | 0.930177 | 9824 |
| ARHGAP11A | WZ3105       | -0.15052 | 1.48E-05 | 9824 |
| ARHGAP11A | XAV939       | 0.052215 | 0.188084 | 9824 |
| ARHGAP11A | XL-184       | -0.10473 | 0.010997 | 9824 |
| ARHGAP11A | XMD11-85h    | 0.040778 | 0.827965 | 9824 |
| ARHGAP11A | XMD13-2      | -0.14249 | 4.75E-05 | 9824 |
| ARHGAP11A | XMD14-99     | -0.04911 | 0.209457 | 9824 |
| ARHGAP11A | XMD15-27     | -0.08055 | 0.064296 | 9824 |
| ARHGAP11A | XMD8-85      | -0.03392 | 0.718202 | 9824 |
| ARHGAP11A | XMD8-92      | -0.03829 | 0.744379 | 9824 |
| ARHGAP11A | Y-39983      | -0.17207 | 1.13E-06 | 9824 |
| ARHGAP11A | YK 4-279     | -0.06    | 0.240853 | 9824 |
| ARHGAP11A | YM155        | -0.10329 | 0.019539 | 9824 |
| ARHGAP11A | YM201636     | -0.1096  | 0.002298 | 9824 |
| ARHGAP11A | Z-LLN1e-CHO  | 0.006732 | 0.944087 | 9824 |
| ARHGAP11A | ZG-10        | -0.11792 | 0.047372 | 9824 |
| ARHGAP11A | ZM-447439    | -0.15407 | 0.000133 | 9824 |
| ARHGAP11A | ZSTK474      | -0.11734 | 0.000997 | 9824 |
| ARHGAP11A | Zibotentan   | 0.009701 | 0.986223 | 9824 |

|           |                    |          |          |      |
|-----------|--------------------|----------|----------|------|
| ARHGAP11A | piperlongumine     | -0.00981 | 0.85721  | 9824 |
| ARHGAP11A | rTRAIL             | 0.020102 | 0.817668 | 9824 |
| ARHGAP11A | selumetinib        | 0.199744 | 6.21E-09 | 9824 |
| BLM       | (5Z)-7-Oxozeaenol  | 0.093278 | 0.015747 | 641  |
| BLM       | 17-AAG             | 0.28726  | 0        | 641  |
| BLM       | 5-Fluorouracil     | -0.23696 | 6.33E-12 | 641  |
| BLM       | 681640             | 0.034644 | 0.583849 | 641  |
| BLM       | A-443654           | 0.032094 | 0.880956 | 641  |
| BLM       | A-770041           | 0.060029 | 0.468188 | 641  |
| BLM       | AC220              | -0.12907 | 0.001294 | 641  |
| BLM       | AG-014699          | 0.107963 | 0.007353 | 641  |
| BLM       | AICAR              | -0.23373 | 1.79E-10 | 641  |
| BLM       | AKT inhibitor VIII | 0.171085 | 2.31E-05 | 641  |
| BLM       | AMG-706            | 0.115066 | 0.017227 | 641  |
| BLM       | AP-24534           | -0.138   | 0.000283 | 641  |
| BLM       | AR-42              | -0.30396 | 1.44E-19 | 641  |
| BLM       | AS601245           | 0.107201 | 0.018425 | 641  |
| BLM       | AS605240           | -0.11372 | 0.00371  | 641  |
| BLM       | AT-7519            | -0.30797 | 2.84E-20 | 641  |
| BLM       | ATRA               | -0.16853 | 2.52E-05 | 641  |
| BLM       | AUY922             | 0.031115 | 0.587193 | 641  |
| BLM       | AZ628              | 0.086575 | 0.229396 | 641  |
| BLM       | AZD6482            | 0.102832 | 0.010392 | 641  |
| BLM       | AZD7762            | -0.21894 | 2.78E-09 | 641  |
| BLM       | AZD8055            | -0.19374 | 1.83E-07 | 641  |
| BLM       | Afatinib           | 0.147767 | 2.66E-05 | 641  |
| BLM       | Axitinib           | -0.10749 | 0.016765 | 641  |
| BLM       | BAY 61-3606        | -0.11078 | 0.00445  | 641  |
| BLM       | BEZ235             | 0.080525 | 0.072626 | 641  |
| BLM       | BHG712             | -0.25274 | 1.14E-13 | 641  |
| BLM       | BI-2536            | -0.11557 | 0.19977  | 641  |
| BLM       | BIRB 0796          | 0.136682 | 0.002619 | 641  |
| BLM       | BIX02189           | -0.237   | 4.97E-12 | 641  |
| BLM       | BMS-509744         | 0.090229 | 0.300756 | 641  |
| BLM       | BMS-536924         | -0.06641 | 0.247873 | 641  |
| BLM       | BMS-708163         | 0.148416 | 9.9E-05  | 641  |
| BLM       | BMS-754807         | 0.006595 | 0.927125 | 641  |
| BLM       | BMS345541          | -0.30613 | 5.59E-20 | 641  |
| BLM       | BX-795             | -0.11557 | 0.004599 | 641  |
| BLM       | BX-912             | -0.30852 | 1.63E-20 | 641  |
| BLM       | Belinostat         | -0.24227 | 3.9E-12  | 641  |
| BLM       | Bexarotene         | 0.035613 | 0.64884  | 641  |
| BLM       | Bicalutamide       | 0.11194  | 0.005963 | 641  |
| BLM       | Bleomycin          | 0.054153 | 0.313074 | 641  |
| BLM       | Bleomycin (50 uM)  | 0.208625 | 1.81E-09 | 641  |
| BLM       | Bortezomib         | 0.109923 | 0.120164 | 641  |
| BLM       | Bosutinib          | -0.0535  | 0.298513 | 641  |
| BLM       | Bryostatins 1      | 0.117649 | 0.009251 | 641  |
| BLM       | CAL-101            | -0.17468 | 8.1E-07  | 641  |
| BLM       | CAY10603           | -0.26655 | 3.86E-15 | 641  |

|     |              |          |          |     |
|-----|--------------|----------|----------|-----|
| BLM | CCT007093    | 0.133467 | 0.000779 | 641 |
| BLM | CCT018159    | 0.023227 | 0.688515 | 641 |
| BLM | CEP-701      | -0.1898  | 3.37E-07 | 641 |
| BLM | CGP-082996   | 0.037387 | 0.731182 | 641 |
| BLM | CGP-60474    | 0.087183 | 0.273213 | 641 |
| BLM | CH5424802    | -0.11555 | 0.009502 | 641 |
| BLM | CHIR-99021   | 0.164944 | 3.3E-06  | 641 |
| BLM | CI-1040      | 0.070651 | 0.096709 | 641 |
| BLM | CMK          | 0.040414 | 0.754487 | 641 |
| BLM | CP466722     | -0.2917  | 3.25E-18 | 641 |
| BLM | CP724714     | 0.062482 | 0.21188  | 641 |
| BLM | CUDC-101     | -0.25648 | 1.03E-13 | 641 |
| BLM | CX-5461      | -0.23614 | 7.3E-12  | 641 |
| BLM | Camptothecin | -0.13434 | 0.000635 | 641 |
| BLM | Cetuximab    | 0.174144 | 3.18E-06 | 641 |
| BLM | Cisplatin    | 0.037411 | 0.467927 | 641 |
| BLM | Crizotinib   | -0.03903 | 0.809381 | 641 |
| BLM | Cyclopamine  | -0.00153 | 0.990894 | 641 |
| BLM | Cytarabine   | -0.02677 | 0.636019 | 641 |
| BLM | DMOG         | -0.10819 | 0.007795 | 641 |
| BLM | Dabrafenib   | 0.062205 | 0.142968 | 641 |
| BLM | Dasatinib    | 0.179412 | 0.003035 | 641 |
| BLM | Docetaxel    | 0.185865 | 3.17E-07 | 641 |
| BLM | Doxorubicin  | -0.00678 | 0.936764 | 641 |
| BLM | EHT 1864     | 0.052317 | 0.40035  | 641 |
| BLM | EKB-569      | -0.16138 | 1.15E-05 | 641 |
| BLM | EX-527       | -0.01399 | 0.916455 | 641 |
| BLM | Elesclomol   | 0.08833  | 0.036013 | 641 |
| BLM | Embelin      | 0.040369 | 0.505003 | 641 |
| BLM | Epothilone B | 0.031355 | 0.567125 | 641 |
| BLM | Erlotinib    | 0.220813 | 0.000486 | 641 |
| BLM | Etoposide    | -0.12593 | 0.002229 | 641 |
| BLM | FH535        | 0.119271 | 0.004294 | 641 |
| BLM | FK866        | -0.29095 | 1.06E-17 | 641 |
| BLM | FMK          | -0.04892 | 0.462813 | 641 |
| BLM | FR-180204    | -0.0916  | 0.043262 | 641 |
| BLM | FTI-277      | 0.227259 | 2.59E-09 | 641 |
| BLM | Foretinib    | -0.1723  | 2.33E-06 | 641 |
| BLM | GDC0449      | -0.02108 | 0.858755 | 641 |
| BLM | GDC0941      | -0.02881 | 0.644744 | 641 |
| BLM | GNF-2        | -0.01385 | 0.968565 | 641 |
| BLM | GSK-650394   | -0.03806 | 0.611263 | 641 |
| BLM | GSK1070916   | -0.33247 | 4.62E-23 | 641 |
| BLM | GSK1904529A  | 0.14367  | 0.000487 | 641 |
| BLM | GSK2126458   | -0.21868 | 3.52E-10 | 641 |
| BLM | GSK269962A   | 0.056104 | 0.252542 | 641 |
| BLM | GSK429286A   | -0.1569  | 2.26E-05 | 641 |
| BLM | GSK690693    | -0.24424 | 1.15E-12 | 641 |
| BLM | GW 441756    | 0.037351 | 0.851374 | 641 |
| BLM | GW-2580      | 0.02648  | 0.957241 | 641 |

|     |                    |          |          |     |
|-----|--------------------|----------|----------|-----|
| BLM | GW843682X          | -0.15973 | 0.030008 | 641 |
| BLM | Gefitinib          | 0.129332 | 0.000892 | 641 |
| BLM | Gemcitabine        | -0.09363 | 0.034812 | 641 |
| BLM | Genentech Cpd 10   | -0.26874 | 3.23E-15 | 641 |
| BLM | HG-5-113-01        | -0.14826 | 0.014475 | 641 |
| BLM | HG-5-88-01         | -0.06883 | 0.585817 | 641 |
| BLM | HG-6-64-1          | 0.031767 | 0.541256 | 641 |
| BLM | I-BET-762          | -0.32703 | 3.25E-23 | 641 |
| BLM | IOX2               | 0.075672 | 0.149591 | 641 |
| BLM | IPA-3              | -0.16096 | 1.37E-05 | 641 |
| BLM | Imatinib           | -0.07932 | 0.537252 | 641 |
| BLM | Ispinesib Mesylate | -0.23467 | 8.49E-12 | 641 |
| BLM | JNJ-26854165       | 0.073487 | 0.114067 | 641 |
| BLM | JNK Inhibitor VIII | 0.186037 | 1.56E-06 | 641 |
| BLM | JNK-9L             | -0.01444 | 0.839491 | 641 |
| BLM | JQ1                | -0.05576 | 0.189098 | 641 |
| BLM | JQ12               | -0.08125 | 0.100028 | 641 |
| BLM | JW-7-24-1          | -0.26612 | 3.35E-15 | 641 |
| BLM | JW-7-52-1          | 0.040055 | 0.719739 | 641 |
| BLM | KIN001-055         | 0.002011 | 0.982967 | 641 |
| BLM | KIN001-102         | -0.29179 | 2.82E-18 | 641 |
| BLM | KIN001-135         | 0.144276 | 0.090375 | 641 |
| BLM | KIN001-236         | -0.23787 | 5.48E-12 | 641 |
| BLM | KIN001-244         | -0.22276 | 1.31E-10 | 641 |
| BLM | KIN001-260         | -0.23754 | 4.18E-12 | 641 |
| BLM | KIN001-266         | -0.12121 | 0.004288 | 641 |
| BLM | KIN001-270         | -0.1385  | 0.00018  | 641 |
| BLM | KU-55933           | -0.09159 | 0.068968 | 641 |
| BLM | LAQ824             | -0.21059 | 7.71E-09 | 641 |
| BLM | LFM-A13            | 0.150901 | 0.00062  | 641 |
| BLM | LY317615           | -0.13208 | 0.000747 | 641 |
| BLM | Lapatinib          | 0.255724 | 6.35E-06 | 641 |
| BLM | Lenalidomide       | -0.05451 | 0.430169 | 641 |
| BLM | Linifanib          | -0.08723 | 0.049445 | 641 |
| BLM | Lisitinib          | -0.02235 | 0.766536 | 641 |
| BLM | MG-132             | 0.10651  | 0.168886 | 641 |
| BLM | MK-2206            | -0.07427 | 0.125111 | 641 |
| BLM | MLN4924            | 0.069325 | 0.19763  | 641 |
| BLM | MP470              | -0.11121 | 0.007431 | 641 |
| BLM | MPS-1-IN-1         | -0.24796 | 1.39E-12 | 641 |
| BLM | MS-275             | -0.22183 | 0.001119 | 641 |
| BLM | Masitinib          | -0.20904 | 2.39E-09 | 641 |
| BLM | Methotrexate       | -0.3486  | 2.35E-24 | 641 |
| BLM | Midostaurin        | 0.117424 | 0.003865 | 641 |
| BLM | Mitomycin C        | -0.12221 | 0.004862 | 641 |
| BLM | NG-25              | -0.27263 | 6.46E-16 | 641 |
| BLM | NPK76-II-72-1      | -0.40888 | 4.16E-37 | 641 |
| BLM | NSC-207895         | -0.15612 | 6.85E-05 | 641 |
| BLM | NSC-87877          | 0.136941 | 0.006399 | 641 |
| BLM | NU-7441            | -0.00841 | 0.939532 | 641 |



|     |                     |          |          |     |
|-----|---------------------|----------|----------|-----|
| BLM | Navitoclax          | -0.35438 | 3.96E-25 | 641 |
| BLM | Nilotinib           | -0.13346 | 0.001744 | 641 |
| BLM | Nutlin-3a (-)       | 0.031697 | 0.54127  | 641 |
| BLM | OSI-027             | -0.25293 | 1.39E-13 | 641 |
| BLM | OSI-930             | -0.16708 | 3.86E-06 | 641 |
| BLM | OSU-03012           | -0.0781  | 0.086492 | 641 |
| BLM | Obatoclax Mesylate  | -0.0507  | 0.284509 | 641 |
| BLM | Olaparib            | 0.063479 | 0.139283 | 641 |
| BLM | PAC-1               | -0.17904 | 2.26E-06 | 641 |
| BLM | PD-0325901          | 0.184368 | 7.08E-07 | 641 |
| BLM | PD-0332991          | -0.00645 | 0.934014 | 641 |
| BLM | PD-173074           | 0.001431 | 0.995206 | 641 |
| BLM | PF-4708671          | 0.062409 | 0.480577 | 641 |
| BLM | PF-562271           | 0.059911 | 0.262237 | 641 |
| BLM | PFI-1               | -0.02512 | 0.640396 | 641 |
| BLM | PHA-665752          | 0.126921 | 0.256685 | 641 |
| BLM | PHA-793887          | -0.33119 | 8.25E-24 | 641 |
| BLM | PI-103              | -0.23886 | 3.31E-12 | 641 |
| BLM | PIK-93              | -0.32614 | 5.23E-23 | 641 |
| BLM | PLX4720             | 0.073937 | 0.06558  | 641 |
| BLM | Paclitaxel          | 0.009754 | 0.954465 | 641 |
| BLM | Parthenolide        | -0.05937 | 0.568091 | 641 |
| BLM | Pazopanib           | 0.101901 | 0.030121 | 641 |
| BLM | Phenformin          | -0.19622 | 2.82E-08 | 641 |
| BLM | Pyrimethamine       | -0.10344 | 0.32129  | 641 |
| BLM | QL-VIII-58          | 0.043842 | 0.591948 | 641 |
| BLM | QL-X-138            | -0.24597 | 8.8E-13  | 641 |
| BLM | QL-XI-92            | -0.26991 | 1.68E-15 | 641 |
| BLM | QL-XII-47           | -0.16706 | 5.44E-06 | 641 |
| BLM | QL-XII-61           | -0.2221  | 4.07E-05 | 641 |
| BLM | QS11                | -0.09873 | 0.063496 | 641 |
| BLM | RDEA119             | 0.178038 | 2.49E-07 | 641 |
| BLM | RO-3306             | 0.190285 | 1.1E-06  | 641 |
| BLM | Rapamycin           | -0.00332 | 0.985107 | 641 |
| BLM | Roscovitine         | 0.07529  | 0.628141 | 641 |
| BLM | Ruxolitinib         | -0.08964 | 0.042808 | 641 |
| BLM | S-Trityl-L-cysteine | -0.11394 | 0.12291  | 641 |
| BLM | SB 216763           | 0.13303  | 0.003305 | 641 |
| BLM | SB 505124           | 0.05601  | 0.419375 | 641 |
| BLM | SB52334             | -0.03199 | 0.534128 | 641 |
| BLM | SB590885            | 0.097195 | 0.029865 | 641 |
| BLM | SGC0946             | 0.116149 | 0.008195 | 641 |
| BLM | SL 0101-1           | 0.080461 | 0.271668 | 641 |
| BLM | SN-38               | -0.03791 | 0.413174 | 641 |
| BLM | SNX-2112            | -0.25625 | 6.19E-14 | 641 |
| BLM | STF-62247           | -0.13107 | 0.000566 | 641 |
| BLM | Salubrinal          | -0.0804  | 0.326859 | 641 |
| BLM | Saracatinib         | 0.067615 | 0.416361 | 641 |
| BLM | Shikonin            | -0.0461  | 0.388693 | 641 |
| BLM | Sorafenib           | -0.03    | 0.817103 | 641 |

|     |              |          |          |     |
|-----|--------------|----------|----------|-----|
| BLM | Sunitinib    | -0.11943 | 0.076353 | 641 |
| BLM | TO901317     | -0.15028 | 5.72E-05 | 641 |
| BLM | TAE684       | 0.035499 | 0.790368 | 641 |
| BLM | TAK-715      | -0.23306 | 1.3E-11  | 641 |
| BLM | TG101348     | -0.2819  | 4.68E-17 | 641 |
| BLM | TGX221       | 0.255273 | 7.33E-06 | 641 |
| BLM | THZ-2-102-1  | -0.3146  | 9.23E-21 | 641 |
| BLM | THZ-2-49     | -0.21283 | 1.16E-09 | 641 |
| BLM | TL-1-85      | -0.27047 | 1.25E-15 | 641 |
| BLM | TL-2-105     | -0.22666 | 6.98E-11 | 641 |
| BLM | TPCA-1       | -0.33581 | 2.16E-24 | 641 |
| BLM | TW 37        | -0.02824 | 0.580789 | 641 |
| BLM | Talazoparib  | -0.00808 | 0.88478  | 641 |
| BLM | Tamoxifen    | 0.019577 | 0.893631 | 641 |
| BLM | Temozolomide | -0.02191 | 0.793349 | 641 |
| BLM | Temsirolimus | -0.00842 | 0.891765 | 641 |
| BLM | Thapsigargin | 0.002306 | 0.981564 | 641 |
| BLM | Tipifarnib   | -0.014   | 0.871107 | 641 |
| BLM | Tivozanib    | -0.0758  | 0.125413 | 641 |
| BLM | Trametinib   | 0.233455 | 1.8E-11  | 641 |
| BLM | Tubastatin A | -0.29586 | 1.05E-18 | 641 |
| BLM | UNC0638      | -0.24751 | 9.09E-14 | 641 |
| BLM | UNC1215      | 0.125265 | 0.004678 | 641 |
| BLM | VNLG/124     | -0.14925 | 6.16E-05 | 641 |
| BLM | VX-11e       | -0.02706 | 0.610011 | 641 |
| BLM | VX-680       | -0.15012 | 0.052731 | 641 |
| BLM | VX-702       | -0.05257 | 0.76319  | 641 |
| BLM | Veliparib    | 0.042609 | 0.537101 | 641 |
| BLM | Vinblastine  | -0.1232  | 0.002113 | 641 |
| BLM | Vinorelbine  | -0.08483 | 0.080575 | 641 |
| BLM | Vorinostat   | -0.36752 | 3.49E-27 | 641 |
| BLM | WH-4-023     | 0.148682 | 0.027144 | 641 |
| BLM | WZ-1-84      | 0.139607 | 0.042963 | 641 |
| BLM | WZ3105       | -0.3108  | 9.93E-21 | 641 |
| BLM | XAV939       | 0.136025 | 0.000249 | 641 |
| BLM | XL-184       | -0.09517 | 0.022829 | 641 |
| BLM | XMD11-85h    | -0.00745 | 0.976453 | 641 |
| BLM | XMD13-2      | -0.26555 | 4.16E-15 | 641 |
| BLM | XMD14-99     | -0.1909  | 7.25E-08 | 641 |
| BLM | XMD15-27     | -0.12656 | 0.001808 | 641 |
| BLM | XMD8-85      | 0.019039 | 0.852918 | 641 |
| BLM | XMD8-92      | -0.05769 | 0.59218  | 641 |
| BLM | Y-39983      | -0.22535 | 9.23E-11 | 641 |
| BLM | YK 4-279     | -0.00181 | 0.98255  | 641 |
| BLM | YM155        | -0.09756 | 0.028756 | 641 |
| BLM | YM201636     | -0.22507 | 7.42E-11 | 641 |
| BLM | Z-LLN1e-CHO  | 0.038455 | 0.641148 | 641 |
| BLM | ZG-10        | -0.15617 | 0.006293 | 641 |
| BLM | ZM-447439    | -0.19284 | 1.27E-06 | 641 |
| BLM | ZSTK474      | -0.23781 | 4.17E-12 | 641 |

|       |                    |          |          |     |
|-------|--------------------|----------|----------|-----|
| BLM   | Zibotentan         | 0.050232 | 0.810004 | 641 |
| BLM   | piperlongumine     | 0.095541 | 0.017192 | 641 |
| BLM   | rTRAIL             | 0.037993 | 0.614922 | 641 |
| BLM   | selumetinib        | 0.183066 | 1.18E-07 | 641 |
| CCNB1 | (5Z)-7-Oxozeaenol  | 0.068809 | 0.086596 | 891 |
| CCNB1 | 17-AAG             | -0.0128  | 0.759727 | 891 |
| CCNB1 | 5-Fluorouracil     | 0.121978 | 0.000639 | 891 |
| CCNB1 | 681640             | -0.05627 | 0.338983 | 891 |
| CCNB1 | A-443654           | -0.03421 | 0.869564 | 891 |
| CCNB1 | A-770041           | -0.05496 | 0.516176 | 891 |
| CCNB1 | AC220              | 0.050937 | 0.276553 | 891 |
| CCNB1 | AG-014699          | 0.002685 | 0.960821 | 891 |
| CCNB1 | AICAR              | 0.029887 | 0.484577 | 891 |
| CCNB1 | AKT inhibitor VIII | 0.052388 | 0.248152 | 891 |
| CCNB1 | AMG-706            | -0.02645 | 0.705054 | 891 |
| CCNB1 | AP-24534           | 0.049279 | 0.243188 | 891 |
| CCNB1 | AR-42              | 0.076765 | 0.033589 | 891 |
| CCNB1 | AS601245           | 5.09E-05 | 0.999289 | 891 |
| CCNB1 | AS605240           | 0.048908 | 0.260163 | 891 |
| CCNB1 | AT-7519            | 0.052506 | 0.15385  | 891 |
| CCNB1 | ATRA               | 0.035125 | 0.499392 | 891 |
| CCNB1 | AUY922             | 0.032278 | 0.569917 | 891 |
| CCNB1 | AZ628              | 0.074856 | 0.313301 | 891 |
| CCNB1 | AZD6482            | 0.011452 | 0.851196 | 891 |
| CCNB1 | AZD7762            | -0.03565 | 0.406526 | 891 |
| CCNB1 | AZD8055            | 0.009747 | 0.831058 | 891 |
| CCNB1 | Afatinib           | 0.020531 | 0.617035 | 891 |
| CCNB1 | Axitinib           | -0.01331 | 0.842765 | 891 |
| CCNB1 | BAY 61-3606        | 0.093735 | 0.017561 | 891 |
| CCNB1 | BEZ235             | -0.04505 | 0.364062 | 891 |
| CCNB1 | BHG712             | 0.095642 | 0.007759 | 891 |
| CCNB1 | BI-2536            | -0.07349 | 0.45925  | 891 |
| CCNB1 | BIRB 0796          | -0.02226 | 0.69985  | 891 |
| CCNB1 | BIX02189           | 0.055022 | 0.142253 | 891 |
| CCNB1 | BMS-509744         | -0.05719 | 0.546124 | 891 |
| CCNB1 | BMS-536924         | 0.012592 | 0.893479 | 891 |
| CCNB1 | BMS-708163         | 0.001201 | 0.981798 | 891 |
| CCNB1 | BMS-754807         | 0.036608 | 0.519562 | 891 |
| CCNB1 | BMS345541          | 0.04759  | 0.201408 | 891 |
| CCNB1 | BX-795             | -0.02701 | 0.596483 | 891 |
| CCNB1 | BX-912             | 0.045496 | 0.217455 | 891 |
| CCNB1 | Belinostat         | 0.06952  | 0.063622 | 891 |
| CCNB1 | Bexarotene         | -0.01846 | 0.844375 | 891 |
| CCNB1 | Bicalutamide       | -0.05043 | 0.258092 | 891 |
| CCNB1 | Bleomycin          | 0.052217 | 0.334435 | 891 |
| CCNB1 | Bleomycin (50 uM)  | -0.02268 | 0.563378 | 891 |
| CCNB1 | Bortezomib         | -0.01426 | 0.891559 | 891 |
| CCNB1 | Bosutinib          | -0.0246  | 0.688792 | 891 |
| CCNB1 | Bryostatins 1      | 0.010741 | 0.871327 | 891 |
| CCNB1 | CAL-101            | 0.053018 | 0.169837 | 891 |

|       |              |          |          |     |
|-------|--------------|----------|----------|-----|
| CCNB1 | CAY10603     | 0.062127 | 0.088619 | 891 |
| CCNB1 | CCT007093    | 0.013529 | 0.794061 | 891 |
| CCNB1 | CCT018159    | -0.03548 | 0.511012 | 891 |
| CCNB1 | CEP-701      | 0.018049 | 0.695273 | 891 |
| CCNB1 | CGP-082996   | -0.07522 | 0.405351 | 891 |
| CCNB1 | CGP-60474    | -0.05176 | 0.567751 | 891 |
| CCNB1 | CH5424802    | -0.00155 | 0.985643 | 891 |
| CCNB1 | CHIR-99021   | -0.07544 | 0.045494 | 891 |
| CCNB1 | CI-1040      | 0.05424  | 0.218641 | 891 |
| CCNB1 | CMK          | 0.017004 | 0.910123 | 891 |
| CCNB1 | CP466722     | 0.024254 | 0.533305 | 891 |
| CCNB1 | CP724714     | 0.038651 | 0.48944  | 891 |
| CCNB1 | CUDC-101     | 0.069597 | 0.060768 | 891 |
| CCNB1 | CX-5461      | 0.063924 | 0.085623 | 891 |
| CCNB1 | Camptothecin | -0.017   | 0.743879 | 891 |
| CCNB1 | Cetuximab    | -0.01551 | 0.736683 | 891 |
| CCNB1 | Cisplatin    | -0.03212 | 0.541142 | 891 |
| CCNB1 | Crizotinib   | -0.04548 | 0.771471 | 891 |
| CCNB1 | Cyclopamine  | 0.029708 | 0.815587 | 891 |
| CCNB1 | Cytarabine   | -0.00775 | 0.904879 | 891 |
| CCNB1 | DMOG         | 0.002954 | 0.960183 | 891 |
| CCNB1 | Dabrafenib   | 0.065556 | 0.12021  | 891 |
| CCNB1 | Dasatinib    | -0.04063 | 0.573675 | 891 |
| CCNB1 | Docetaxel    | -0.08754 | 0.019384 | 891 |
| CCNB1 | Doxorubicin  | 0.013896 | 0.862727 | 891 |
| CCNB1 | EHT 1864     | 0.022695 | 0.773617 | 891 |
| CCNB1 | EKB-569      | 0.027126 | 0.53685  | 891 |
| CCNB1 | EX-527       | -0.02446 | 0.842704 | 891 |
| CCNB1 | Elesclomol   | -0.1271  | 0.00176  | 891 |
| CCNB1 | Embelin      | -0.00579 | 0.946552 | 891 |
| CCNB1 | Epothilone B | -0.01576 | 0.795654 | 891 |
| CCNB1 | Erlotinib    | -0.00468 | 0.959556 | 891 |
| CCNB1 | Etoposide    | -0.03437 | 0.500917 | 891 |
| CCNB1 | FH535        | 0.032205 | 0.536354 | 891 |
| CCNB1 | FK866        | 0.058925 | 0.113047 | 891 |
| CCNB1 | FMK          | 0.031699 | 0.665096 | 891 |
| CCNB1 | FR-180204    | 0.040872 | 0.442976 | 891 |
| CCNB1 | FTI-277      | 0.073899 | 0.070498 | 891 |
| CCNB1 | Foretinib    | 0.035997 | 0.413839 | 891 |
| CCNB1 | GDC0449      | 0.035581 | 0.728598 | 891 |
| CCNB1 | GDC0941      | -0.03056 | 0.620092 | 891 |
| CCNB1 | GNF-2        | -0.03329 | 0.901926 | 891 |
| CCNB1 | GSK-650394   | 0.00325  | 0.974298 | 891 |
| CCNB1 | GSK1070916   | 0.032074 | 0.413637 | 891 |
| CCNB1 | GSK1904529A  | -0.02692 | 0.591591 | 891 |
| CCNB1 | GSK2126458   | 0.048951 | 0.205289 | 891 |
| CCNB1 | GSK269962A   | 0.037293 | 0.490163 | 891 |
| CCNB1 | GSK429286A   | 0.012023 | 0.805711 | 891 |
| CCNB1 | GSK690693    | 0.0063   | 0.883193 | 891 |
| CCNB1 | GW 441756    | -0.02109 | 0.93525  | 891 |

|       |                    |          |          |     |
|-------|--------------------|----------|----------|-----|
| CCNB1 | GW-2580            | 0.039787 | 0.91528  | 891 |
| CCNB1 | GW843682X          | -0.08776 | 0.290148 | 891 |
| CCNB1 | Gefitinib          | 0.031091 | 0.476496 | 891 |
| CCNB1 | Gemcitabine        | -0.03773 | 0.465035 | 891 |
| CCNB1 | Genentech Cpd 10   | 0.019021 | 0.643566 | 891 |
| CCNB1 | HG-5-113-01        | -0.0227  | 0.790685 | 891 |
| CCNB1 | HG-5-88-01         | 0.051318 | 0.731338 | 891 |
| CCNB1 | HG-6-64-1          | 0.053776 | 0.254965 | 891 |
| CCNB1 | I-BET-762          | 0.100156 | 0.004176 | 891 |
| CCNB1 | IOX2               | -0.06147 | 0.263168 | 891 |
| CCNB1 | IPA-3              | 0.023772 | 0.582329 | 891 |
| CCNB1 | Imatinib           | 0.003183 | 0.989531 | 891 |
| CCNB1 | Ispinesib Mesylate | 0.085812 | 0.018608 | 891 |
| CCNB1 | JNJ-26854165       | -0.05384 | 0.277875 | 891 |
| CCNB1 | JNK Inhibitor VIII | -0.09479 | 0.020359 | 891 |
| CCNB1 | JNK-9L             | 0.061044 | 0.246898 | 891 |
| CCNB1 | JQ1                | 0.08854  | 0.02763  | 891 |
| CCNB1 | JQ12               | 0.07954  | 0.108526 | 891 |
| CCNB1 | JW-7-24-1          | 0.059192 | 0.105767 | 891 |
| CCNB1 | JW-7-52-1          | -0.05558 | 0.592252 | 891 |
| CCNB1 | KIN001-055         | 0.016759 | 0.840057 | 891 |
| CCNB1 | KIN001-102         | 0.063122 | 0.081634 | 891 |
| CCNB1 | KIN001-135         | 0.071566 | 0.470889 | 891 |
| CCNB1 | KIN001-236         | 0.121628 | 0.000721 | 891 |
| CCNB1 | KIN001-244         | 0.075102 | 0.041767 | 891 |
| CCNB1 | KIN001-260         | 0.087097 | 0.015965 | 891 |
| CCNB1 | KIN001-266         | 0.049611 | 0.297344 | 891 |
| CCNB1 | KIN001-270         | -0.03463 | 0.40636  | 891 |
| CCNB1 | KU-55933           | -0.03423 | 0.602721 | 891 |
| CCNB1 | LAQ824             | 0.072775 | 0.064566 | 891 |
| CCNB1 | LFM-A13            | 0.006223 | 0.92481  | 891 |
| CCNB1 | LY317615           | 0.014323 | 0.780566 | 891 |
| CCNB1 | Lapatinib          | 0.008559 | 0.90736  | 891 |
| CCNB1 | Lenalidomide       | -0.02387 | 0.794019 | 891 |
| CCNB1 | Linifanib          | 0.065167 | 0.170199 | 891 |
| CCNB1 | Lisitinib          | 0.03763  | 0.576414 | 891 |
| CCNB1 | MG-132             | -0.02071 | 0.858851 | 891 |
| CCNB1 | MK-2206            | -0.04919 | 0.339364 | 891 |
| CCNB1 | MLN4924            | -0.00599 | 0.936349 | 891 |
| CCNB1 | MP470              | -0.01891 | 0.693437 | 891 |
| CCNB1 | MPS-1-IN-1         | 0.05385  | 0.162207 | 891 |
| CCNB1 | MS-275             | -0.03004 | 0.755098 | 891 |
| CCNB1 | Masitinib          | 0.078538 | 0.035365 | 891 |
| CCNB1 | Methotrexate       | 0.092672 | 0.01225  | 891 |
| CCNB1 | Midostaurin        | -0.02112 | 0.674646 | 891 |
| CCNB1 | Mitomycin C        | 0.04892  | 0.339568 | 891 |
| CCNB1 | NG-25              | 0.088048 | 0.014236 | 891 |
| CCNB1 | NPK76-II-72-1      | 0.032936 | 0.37748  | 891 |
| CCNB1 | NSC-207895         | -0.06662 | 0.120941 | 891 |
| CCNB1 | NSC-87877          | 0.058413 | 0.275929 | 891 |

|       |                     |          |          |     |
|-------|---------------------|----------|----------|-----|
| CCNB1 | NU-7441             | -0.02502 | 0.76763  | 891 |
| CCNB1 | Navitoclax          | 0.018198 | 0.661345 | 891 |
| CCNB1 | Nilotinib           | 0.01166  | 0.855181 | 891 |
| CCNB1 | Nutlin-3a (-)       | 0.120314 | 0.003978 | 891 |
| CCNB1 | OSI-027             | 0.054219 | 0.144385 | 891 |
| CCNB1 | OSI-930             | 0.0733   | 0.056499 | 891 |
| CCNB1 | OSU-03012           | 0.037885 | 0.46608  | 891 |
| CCNB1 | Obatoclax Mesylate  | 0.050884 | 0.28272  | 891 |
| CCNB1 | Olaparib            | 0.008492 | 0.872826 | 891 |
| CCNB1 | PAC-1               | 0.060481 | 0.150047 | 891 |
| CCNB1 | PD-0325901          | 0.06712  | 0.094937 | 891 |
| CCNB1 | PD-0332991          | 0.036963 | 0.527174 | 891 |
| CCNB1 | PD-173074           | -0.00741 | 0.979441 | 891 |
| CCNB1 | PF-4708671          | 0.061272 | 0.489113 | 891 |
| CCNB1 | PF-562271           | -0.01289 | 0.851432 | 891 |
| CCNB1 | PFI-1               | 0.097347 | 0.02356  | 891 |
| CCNB1 | PHA-665752          | 0.020084 | 0.907554 | 891 |
| CCNB1 | PHA-793887          | 0.084733 | 0.016618 | 891 |
| CCNB1 | PI-103              | 0.052653 | 0.157032 | 891 |
| CCNB1 | PIK-93              | 0.058894 | 0.104528 | 891 |
| CCNB1 | PLX4720             | 0.068292 | 0.09183  | 891 |
| CCNB1 | Paclitaxel          | -0.04321 | 0.721052 | 891 |
| CCNB1 | Parthenolide        | 0.026198 | 0.832206 | 891 |
| CCNB1 | Pazopanib           | 0.000546 | 0.995322 | 891 |
| CCNB1 | Phenformin          | 0.088566 | 0.016104 | 891 |
| CCNB1 | Pyrimethamine       | 0.045044 | 0.71041  | 891 |
| CCNB1 | QL-VIII-58          | -0.0157  | 0.876424 | 891 |
| CCNB1 | QL-X-138            | 0.01999  | 0.620402 | 891 |
| CCNB1 | QL-XI-92            | 0.040683 | 0.284838 | 891 |
| CCNB1 | QL-XII-47           | 0.024061 | 0.585097 | 891 |
| CCNB1 | QL-XII-61           | 0.004011 | 0.96356  | 891 |
| CCNB1 | QS11                | 0.004377 | 0.960656 | 891 |
| CCNB1 | RDEA119             | 0.104558 | 0.003478 | 891 |
| CCNB1 | RO-3306             | -0.04856 | 0.255936 | 891 |
| CCNB1 | Rapamycin           | -0.03587 | 0.798678 | 891 |
| CCNB1 | Roscovitine         | 0.049642 | 0.780379 | 891 |
| CCNB1 | Ruxolitinib         | 0.002986 | 0.965076 | 891 |
| CCNB1 | S-Trityl-L-cysteine | 0.001231 | 0.99194  | 891 |
| CCNB1 | SB 216763           | -0.01951 | 0.723957 | 891 |
| CCNB1 | SB 505124           | 0.045281 | 0.535354 | 891 |
| CCNB1 | SB52334             | 0.037465 | 0.451765 | 891 |
| CCNB1 | SB590885            | 0.091688 | 0.042812 | 891 |
| CCNB1 | SGC0946             | -0.00732 | 0.918951 | 891 |
| CCNB1 | SL 0101-1           | 0.044197 | 0.564616 | 891 |
| CCNB1 | SN-38               | 0.036548 | 0.433749 | 891 |
| CCNB1 | SNX-2112            | 0.098412 | 0.006303 | 891 |
| CCNB1 | STF-62247           | 0.022371 | 0.619749 | 891 |
| CCNB1 | Salubrinal          | 0.054304 | 0.537266 | 891 |
| CCNB1 | Saracatinib         | -0.07687 | 0.347251 | 891 |
| CCNB1 | Shikonin            | -0.00539 | 0.938042 | 891 |

|       |              |          |          |     |
|-------|--------------|----------|----------|-----|
| CCNB1 | Sorafenib    | 0.070388 | 0.496596 | 891 |
| CCNB1 | Sunitinib    | 0.014049 | 0.885209 | 891 |
| CCNB1 | T0901317     | 0.048848 | 0.242106 | 891 |
| CCNB1 | TAE684       | -0.0625  | 0.572844 | 891 |
| CCNB1 | TAK-715      | 0.059434 | 0.108275 | 891 |
| CCNB1 | TG101348     | 0.066756 | 0.066378 | 891 |
| CCNB1 | TGX221       | 0.026005 | 0.717674 | 891 |
| CCNB1 | THZ-2-102-1  | 0.057803 | 0.118406 | 891 |
| CCNB1 | THZ-2-49     | 0.053012 | 0.160724 | 891 |
| CCNB1 | TL-1-85      | 0.075239 | 0.03905  | 891 |
| CCNB1 | TL-2-105     | 0.042137 | 0.278121 | 891 |
| CCNB1 | TPCA-1       | 0.05594  | 0.124637 | 891 |
| CCNB1 | TW 37        | -0.09083 | 0.027695 | 891 |
| CCNB1 | Talazoparib  | 0.027714 | 0.573024 | 891 |
| CCNB1 | Tamoxifen    | 0.008431 | 0.960748 | 891 |
| CCNB1 | Temozolomide | 0.041865 | 0.557393 | 891 |
| CCNB1 | Temsirolimus | -0.07266 | 0.111594 | 891 |
| CCNB1 | Thapsigargin | -0.01158 | 0.897145 | 891 |
| CCNB1 | Tipifarnib   | 0.037459 | 0.586391 | 891 |
| CCNB1 | Tivozanib    | -0.00955 | 0.902498 | 891 |
| CCNB1 | Trametinib   | 0.096098 | 0.008879 | 891 |
| CCNB1 | Tubastatin A | 0.104694 | 0.003148 | 891 |
| CCNB1 | UNC0638      | 0.086104 | 0.014488 | 891 |
| CCNB1 | UNC1215      | 0.047935 | 0.342783 | 891 |
| CCNB1 | VNLG/124     | 0.056096 | 0.174512 | 891 |
| CCNB1 | VX-11e       | 0.097238 | 0.021652 | 891 |
| CCNB1 | VX-680       | -0.0291  | 0.795079 | 891 |
| CCNB1 | VX-702       | 0.026833 | 0.913331 | 891 |
| CCNB1 | Veliparib    | -0.03193 | 0.659169 | 891 |
| CCNB1 | Vinblastine  | -0.02765 | 0.570155 | 891 |
| CCNB1 | Vinorelbine  | -0.00709 | 0.922851 | 891 |
| CCNB1 | Vorinostat   | 0.015381 | 0.702052 | 891 |
| CCNB1 | WH-4-023     | 0.005166 | 0.959715 | 891 |
| CCNB1 | WZ-1-84      | -0.01765 | 0.851019 | 891 |
| CCNB1 | WZ3105       | 0.061958 | 0.0885   | 891 |
| CCNB1 | XAV939       | -0.06505 | 0.095349 | 891 |
| CCNB1 | XL-184       | 0.052742 | 0.252232 | 891 |
| CCNB1 | XMD11-85h    | 0.107295 | 0.377694 | 891 |
| CCNB1 | XMD13-2      | 0.097125 | 0.006528 | 891 |
| CCNB1 | XMD14-99     | 0.103909 | 0.004786 | 891 |
| CCNB1 | XMD15-27     | 0.029974 | 0.55885  | 891 |
| CCNB1 | XMD8-85      | 0.064592 | 0.439317 | 891 |
| CCNB1 | XMD8-92      | 0.046684 | 0.675385 | 891 |
| CCNB1 | Y-39983      | 0.02955  | 0.465982 | 891 |
| CCNB1 | YK 4-279     | 0.007914 | 0.914306 | 891 |
| CCNB1 | YM155        | -0.02058 | 0.736219 | 891 |
| CCNB1 | YM201636     | 0.035964 | 0.354971 | 891 |
| CCNB1 | Z-LLN1e-CHO  | -0.00569 | 0.952586 | 891 |
| CCNB1 | ZG-10        | -0.00154 | 0.98628  | 891 |
| CCNB1 | ZM-447439    | 0.014759 | 0.790278 | 891 |

|       |                    |          |          |        |
|-------|--------------------|----------|----------|--------|
| CCNB1 | ZSTK474            | 0.020579 | 0.60643  | 891    |
| CCNB1 | Zibotentan         | -0.01497 | 0.969121 | 891    |
| CCNB1 | piperlongumine     | -0.03857 | 0.396574 | 891    |
| CCNB1 | rTRAIL             | -0.00853 | 0.931104 | 891    |
| CCNB1 | selumetinib        | 0.109832 | 0.002176 | 891    |
| CDCA2 | (5Z)-7-Oxozeaenol  | 0.090891 | 0.018983 | 157313 |
| CDCA2 | 17-AAG             | 0.14857  | 4.3E-05  | 157313 |
| CDCA2 | 5-Fluorouracil     | -0.03311 | 0.392127 | 157313 |
| CDCA2 | 681640             | 0.022927 | 0.730986 | 157313 |
| CDCA2 | A-443654           | -0.03086 | 0.888908 | 157313 |
| CDCA2 | A-770041           | -0.04548 | 0.60414  | 157313 |
| CDCA2 | AC220              | -0.02382 | 0.661888 | 157313 |
| CDCA2 | AG-014699          | 0.067733 | 0.104777 | 157313 |
| CDCA2 | AICAR              | -0.04813 | 0.241854 | 157313 |
| CDCA2 | AKT inhibitor VIII | 0.101983 | 0.015062 | 157313 |
| CDCA2 | AMG-706            | 0.036429 | 0.567678 | 157313 |
| CDCA2 | AP-24534           | -0.1002  | 0.010405 | 157313 |
| CDCA2 | AR-42              | -0.15334 | 1.17E-05 | 157313 |
| CDCA2 | AS601245           | 0.084998 | 0.074849 | 157313 |
| CDCA2 | AS605240           | 0.011021 | 0.832458 | 157313 |
| CDCA2 | AT-7519            | -0.12617 | 0.00033  | 157313 |
| CDCA2 | ATRA               | -0.01714 | 0.76766  | 157313 |
| CDCA2 | AUY922             | 0.034571 | 0.537334 | 157313 |
| CDCA2 | AZ628              | 0.110373 | 0.110175 | 157313 |
| CDCA2 | AZD6482            | -0.02139 | 0.697348 | 157313 |
| CDCA2 | AZD7762            | -0.18764 | 4.71E-07 | 157313 |
| CDCA2 | AZD8055            | -0.12668 | 0.000875 | 157313 |
| CDCA2 | Afatinib           | 0.13917  | 8.19E-05 | 157313 |
| CDCA2 | Axitinib           | -0.05407 | 0.289623 | 157313 |
| CDCA2 | BAY 61-3606        | -0.07339 | 0.068793 | 157313 |
| CDCA2 | BEZ235             | -0.04508 | 0.363624 | 157313 |
| CDCA2 | BHG712             | -0.11473 | 0.001256 | 157313 |
| CDCA2 | BI-2536            | -0.07677 | 0.43329  | 157313 |
| CDCA2 | BIRB 0796          | 0.035566 | 0.511729 | 157313 |
| CDCA2 | BIX02189           | -0.134   | 0.000157 | 157313 |
| CDCA2 | BMS-509744         | 0.081319 | 0.357612 | 157313 |
| CDCA2 | BMS-536924         | 0.048561 | 0.455789 | 157313 |
| CDCA2 | BMS-708163         | 0.094011 | 0.015978 | 157313 |
| CDCA2 | BMS-754807         | 0.095567 | 0.04518  | 157313 |
| CDCA2 | BMS345541          | -0.13364 | 0.000143 | 157313 |
| CDCA2 | BX-795             | -0.08374 | 0.049985 | 157313 |
| CDCA2 | BX-912             | -0.17437 | 4.11E-07 | 157313 |
| CDCA2 | Belinostat         | -0.12965 | 0.000335 | 157313 |
| CDCA2 | Bexarotene         | 0.022523 | 0.79797  | 157313 |
| CDCA2 | Bicalutamide       | 0.026742 | 0.583845 | 157313 |
| CDCA2 | Bleomycin          | 0.07748  | 0.119015 | 157313 |
| CDCA2 | Bleomycin (50 uM)  | 0.081441 | 0.024628 | 157313 |
| CDCA2 | Bortezomib         | 0.011948 | 0.910363 | 157313 |
| CDCA2 | Bosutinib          | -0.0561  | 0.269678 | 157313 |
| CDCA2 | Bryostatins 1      | 0.064667 | 0.189112 | 157313 |



|       |              |          |          |        |
|-------|--------------|----------|----------|--------|
| CDCA2 | CAL-101      | -0.12603 | 0.000492 | 157313 |
| CDCA2 | CAY10603     | -0.16333 | 2.66E-06 | 157313 |
| CDCA2 | CCT007093    | 0.108481 | 0.007178 | 157313 |
| CDCA2 | CCT018159    | 0.018225 | 0.764486 | 157313 |
| CDCA2 | CEP-701      | -0.13619 | 0.000358 | 157313 |
| CDCA2 | CGP-082996   | 0.017079 | 0.892291 | 157313 |
| CDCA2 | CGP-60474    | -0.02704 | 0.790006 | 157313 |
| CDCA2 | CH5424802    | -0.03548 | 0.570392 | 157313 |
| CDCA2 | CHIR-99021   | 0.007025 | 0.878293 | 157313 |
| CDCA2 | CI-1040      | 0.126046 | 0.001473 | 157313 |
| CDCA2 | CMK          | 0.000165 | 0.999035 | 157313 |
| CDCA2 | CP466722     | -0.15134 | 1.4E-05  | 157313 |
| CDCA2 | CP724714     | 0.072326 | 0.133455 | 157313 |
| CDCA2 | CUDC-101     | -0.12752 | 0.000381 | 157313 |
| CDCA2 | CX-5461      | -0.10998 | 0.00223  | 157313 |
| CDCA2 | Camptothecin | -0.09474 | 0.02064  | 157313 |
| CDCA2 | Cetuximab    | 0.081929 | 0.039396 | 157313 |
| CDCA2 | Cisplatin    | -0.04447 | 0.377923 | 157313 |
| CDCA2 | Crizotinib   | -0.11308 | 0.271785 | 157313 |
| CDCA2 | Cyclopamine  | -0.00114 | 0.993163 | 157313 |
| CDCA2 | Cytarabine   | -0.0406  | 0.436681 | 157313 |
| CDCA2 | DMOG         | -0.10426 | 0.010627 | 157313 |
| CDCA2 | Dabrafenib   | 0.099863 | 0.012397 | 157313 |
| CDCA2 | Dasatinib    | 0.01607  | 0.837893 | 157313 |
| CDCA2 | Docetaxel    | 0.102409 | 0.005871 | 157313 |
| CDCA2 | Doxorubicin  | 0.005319 | 0.94991  | 157313 |
| CDCA2 | EHT 1864     | 0.061068 | 0.311348 | 157313 |
| CDCA2 | EKB-569      | -0.0474  | 0.249987 | 157313 |
| CDCA2 | EX-527       | -0.00791 | 0.95587  | 157313 |
| CDCA2 | Elesclomol   | -0.05489 | 0.217317 | 157313 |
| CDCA2 | Embelin      | -0.00151 | 0.987657 | 157313 |
| CDCA2 | Epothilone B | 0.057954 | 0.243649 | 157313 |
| CDCA2 | Erlotinib    | 0.13439  | 0.049034 | 157313 |
| CDCA2 | Etoposide    | -0.08475 | 0.050736 | 157313 |
| CDCA2 | FH535        | 0.092148 | 0.032665 | 157313 |
| CDCA2 | FK866        | -0.15504 | 1.05E-05 | 157313 |
| CDCA2 | FMK          | -0.02618 | 0.73161  | 157313 |
| CDCA2 | FR-180204    | 0.009923 | 0.885524 | 157313 |
| CDCA2 | FTI-277      | 0.121486 | 0.00201  | 157313 |
| CDCA2 | Foretinib    | -0.10993 | 0.003793 | 157313 |
| CDCA2 | GDC0449      | 0.052462 | 0.562297 | 157313 |
| CDCA2 | GDC0941      | -0.08502 | 0.072429 | 157313 |
| CDCA2 | GNF-2        | -0.03368 | 0.899601 | 157313 |
| CDCA2 | GSK-650394   | -0.00868 | 0.932412 | 157313 |
| CDCA2 | GSK1070916   | -0.15747 | 8.55E-06 | 157313 |
| CDCA2 | GSK1904529A  | 0.047998 | 0.297933 | 157313 |
| CDCA2 | GSK2126458   | -0.1202  | 0.000912 | 157313 |
| CDCA2 | GSK269962A   | -0.0096  | 0.885664 | 157313 |
| CDCA2 | GSK429286A   | -0.12999 | 0.000541 | 157313 |
| CDCA2 | GSK690693    | -0.1867  | 8.82E-08 | 157313 |

|       |                    |          |          |        |
|-------|--------------------|----------|----------|--------|
| CDCA2 | GW 441756          | -0.035   | 0.863925 | 157313 |
| CDCA2 | GW-2580            | -0.03214 | 0.941018 | 157313 |
| CDCA2 | GW843682X          | -0.08528 | 0.307503 | 157313 |
| CDCA2 | Gefitinib          | 0.130222 | 0.000818 | 157313 |
| CDCA2 | Gemcitabine        | -0.05845 | 0.221736 | 157313 |
| CDCA2 | Genentech Cpd 10   | -0.1622  | 3.78E-06 | 157313 |
| CDCA2 | HG-5-113-01        | -0.05724 | 0.426955 | 157313 |
| CDCA2 | HG-5-88-01         | 0.011321 | 0.959238 | 157313 |
| CDCA2 | HG-6-64-1          | -0.01696 | 0.768582 | 157313 |
| CDCA2 | I-BET-762          | -0.17921 | 1.55E-07 | 157313 |
| CDCA2 | IOX2               | -0.05043 | 0.373041 | 157313 |
| CDCA2 | IPA-3              | -0.10842 | 0.004377 | 157313 |
| CDCA2 | Imatinib           | -0.09029 | 0.442539 | 157313 |
| CDCA2 | Ispinesib Mesylate | -0.08    | 0.028839 | 157313 |
| CDCA2 | JNJ-26854165       | 0.020996 | 0.722032 | 157313 |
| CDCA2 | JNK Inhibitor VIII | 0.050246 | 0.244961 | 157313 |
| CDCA2 | JNK-9L             | 0.008689 | 0.908188 | 157313 |
| CDCA2 | JQ1                | 0.046637 | 0.281814 | 157313 |
| CDCA2 | JQ12               | 0.009153 | 0.894897 | 157313 |
| CDCA2 | JW-7-24-1          | -0.16264 | 2.79E-06 | 157313 |
| CDCA2 | JW-7-52-1          | 0.009765 | 0.942538 | 157313 |
| CDCA2 | KIN001-055         | 0.043204 | 0.489814 | 157313 |
| CDCA2 | KIN001-102         | -0.12117 | 0.000544 | 157313 |
| CDCA2 | KIN001-135         | 0.08788  | 0.352689 | 157313 |
| CDCA2 | KIN001-236         | -0.0965  | 0.008085 | 157313 |
| CDCA2 | KIN001-244         | -0.14709 | 3.34E-05 | 157313 |
| CDCA2 | KIN001-260         | -0.11202 | 0.001694 | 157313 |
| CDCA2 | KIN001-266         | -0.04492 | 0.351782 | 157313 |
| CDCA2 | KIN001-270         | -0.15969 | 1.32E-05 | 157313 |
| CDCA2 | KU-55933           | -0.05291 | 0.360959 | 157313 |
| CDCA2 | LAQ824             | -0.04183 | 0.31156  | 157313 |
| CDCA2 | LFM-A13            | 0.090532 | 0.050184 | 157313 |
| CDCA2 | LY317615           | -0.02133 | 0.664488 | 157313 |
| CDCA2 | Lapatinib          | 0.185139 | 0.001633 | 157313 |
| CDCA2 | Lenalidomide       | -0.02959 | 0.729375 | 157313 |
| CDCA2 | Linifanib          | -0.00243 | 0.973119 | 157313 |
| CDCA2 | Lisitinib          | 0.085563 | 0.102964 | 157313 |
| CDCA2 | MG-132             | -0.00881 | 0.943324 | 157313 |
| CDCA2 | MK-2206            | -0.1387  | 0.001752 | 157313 |
| CDCA2 | MLN4924            | 0.06594  | 0.224499 | 157313 |
| CDCA2 | MP470              | -0.05566 | 0.19647  | 157313 |
| CDCA2 | MPS-1-IN-1         | -0.0556  | 0.148046 | 157313 |
| CDCA2 | MS-275             | -0.11381 | 0.121639 | 157313 |
| CDCA2 | Masitinib          | -0.09266 | 0.012016 | 157313 |
| CDCA2 | Methotrexate       | -0.11369 | 0.001897 | 157313 |
| CDCA2 | Midostaurin        | 0.031183 | 0.516509 | 157313 |
| CDCA2 | Mitomycin C        | -0.00586 | 0.932814 | 157313 |
| CDCA2 | NG-25              | -0.15237 | 1.25E-05 | 157313 |
| CDCA2 | NPK76-II-72-1      | -0.20293 | 2.3E-09  | 157313 |
| CDCA2 | NSC-207895         | -0.17854 | 4.81E-06 | 157313 |

|       |                     |          |          |        |
|-------|---------------------|----------|----------|--------|
| CDCA2 | NSC-87877           | 0.111855 | 0.026046 | 157313 |
| CDCA2 | NU-7441             | -0.05471 | 0.416049 | 157313 |
| CDCA2 | Navitoclax          | -0.18057 | 4.93E-07 | 157313 |
| CDCA2 | Nilotinib           | -0.07229 | 0.128095 | 157313 |
| CDCA2 | Nutlin-3a (-)       | 0.072225 | 0.108422 | 157313 |
| CDCA2 | OSI-027             | -0.15879 | 5.91E-06 | 157313 |
| CDCA2 | OSI-930             | -0.06529 | 0.092236 | 157313 |
| CDCA2 | OSU-03012           | 0.008708 | 0.892511 | 157313 |
| CDCA2 | Obatoclax Mesylate  | 0.00705  | 0.906679 | 157313 |
| CDCA2 | Olaparib            | 0.016771 | 0.737631 | 157313 |
| CDCA2 | PAC-1               | -0.03445 | 0.445212 | 157313 |
| CDCA2 | PD-0325901          | 0.177821 | 1.79E-06 | 157313 |
| CDCA2 | PD-0332991          | 0.026943 | 0.667157 | 157313 |
| CDCA2 | PD-173074           | -0.02994 | 0.85747  | 157313 |
| CDCA2 | PF-4708671          | 0.068905 | 0.427385 | 157313 |
| CDCA2 | PF-562271           | 0.047308 | 0.394529 | 157313 |
| CDCA2 | PFI-1               | 0.031754 | 0.54148  | 157313 |
| CDCA2 | PHA-665752          | 0.017333 | 0.922026 | 157313 |
| CDCA2 | PHA-793887          | -0.12867 | 0.000213 | 157313 |
| CDCA2 | PI-103              | -0.17074 | 1.02E-06 | 157313 |
| CDCA2 | PIK-93              | -0.19228 | 1.9E-08  | 157313 |
| CDCA2 | PLX4720             | 0.116315 | 0.002092 | 157313 |
| CDCA2 | Paclitaxel          | 0.019452 | 0.897498 | 157313 |
| CDCA2 | Parthenolide        | -0.07024 | 0.481517 | 157313 |
| CDCA2 | Pazopanib           | -0.00369 | 0.961579 | 157313 |
| CDCA2 | Phenformin          | -0.03464 | 0.378835 | 157313 |
| CDCA2 | Pyrimethamine       | -0.02862 | 0.827896 | 157313 |
| CDCA2 | QL-VIII-58          | -0.0452  | 0.580591 | 157313 |
| CDCA2 | QL-X-138            | -0.17653 | 4.76E-07 | 157313 |
| CDCA2 | QL-XI-92            | -0.17559 | 4.54E-07 | 157313 |
| CDCA2 | QL-XII-47           | -0.09395 | 0.014404 | 157313 |
| CDCA2 | QL-XII-61           | -0.14172 | 0.014105 | 157313 |
| CDCA2 | QS11                | -0.0363  | 0.576978 | 157313 |
| CDCA2 | RDEA119             | 0.194441 | 1.48E-08 | 157313 |
| CDCA2 | RO-3306             | 0.040679 | 0.349147 | 157313 |
| CDCA2 | Rapamycin           | -0.09523 | 0.358681 | 157313 |
| CDCA2 | Roscovitine         | 0.026043 | 0.904201 | 157313 |
| CDCA2 | Ruxolitinib         | -0.05438 | 0.26704  | 157313 |
| CDCA2 | S-Trityl-L-cysteine | -0.04594 | 0.603524 | 157313 |
| CDCA2 | SB 216763           | 0.064091 | 0.188268 | 157313 |
| CDCA2 | SB 505124           | 0.023497 | 0.790364 | 157313 |
| CDCA2 | SB52334             | 0.005588 | 0.932346 | 157313 |
| CDCA2 | SB590885            | 0.146577 | 0.000375 | 157313 |
| CDCA2 | SGC0946             | 0.032266 | 0.572407 | 157313 |
| CDCA2 | SL 0101-1           | 0.103198 | 0.167083 | 157313 |
| CDCA2 | SN-38               | -0.03519 | 0.454549 | 157313 |
| CDCA2 | SNX-2112            | -0.12395 | 0.000493 | 157313 |
| CDCA2 | STF-62247           | -0.09228 | 0.017912 | 157313 |
| CDCA2 | Salubrinol          | -0.01374 | 0.899943 | 157313 |
| CDCA2 | Saracatinib         | 0.000538 | 0.996767 | 157313 |

|       |              |          |          |        |
|-------|--------------|----------|----------|--------|
| CDCA2 | Shikonin     | -0.03405 | 0.547907 | 157313 |
| CDCA2 | Sorafenib    | 0.007847 | 0.95713  | 157313 |
| CDCA2 | Sunitinib    | -0.04392 | 0.591305 | 157313 |
| CDCA2 | T0901317     | -0.11176 | 0.003591 | 157313 |
| CDCA2 | TAE684       | -0.00844 | 0.960986 | 157313 |
| CDCA2 | TAK-715      | -0.10749 | 0.002635 | 157313 |
| CDCA2 | TG101348     | -0.13652 | 9.54E-05 | 157313 |
| CDCA2 | TGX221       | 0.077277 | 0.235025 | 157313 |
| CDCA2 | THZ-2-102-1  | -0.13405 | 0.000153 | 157313 |
| CDCA2 | THZ-2-49     | -0.09808 | 0.00707  | 157313 |
| CDCA2 | TL-1-85      | -0.14548 | 3.34E-05 | 157313 |
| CDCA2 | TL-2-105     | -0.12676 | 0.000431 | 157313 |
| CDCA2 | TPCA-1       | -0.16342 | 2.16E-06 | 157313 |
| CDCA2 | TW 37        | -0.09521 | 0.019916 | 157313 |
| CDCA2 | Talazoparib  | -0.01706 | 0.743426 | 157313 |
| CDCA2 | Tamoxifen    | 0.020447 | 0.887011 | 157313 |
| CDCA2 | Temozolomide | 0.006528 | 0.94989  | 157313 |
| CDCA2 | Temsirolimus | -0.13391 | 0.001137 | 157313 |
| CDCA2 | Thapsigargin | 0.014051 | 0.872214 | 157313 |
| CDCA2 | Tipifarnib   | 0.037428 | 0.586869 | 157313 |
| CDCA2 | Tivozanib    | -0.06078 | 0.2493   | 157313 |
| CDCA2 | Trametinib   | 0.217921 | 4.05E-10 | 157313 |
| CDCA2 | Tubastatin A | -0.11979 | 0.000675 | 157313 |
| CDCA2 | UNC0638      | -0.10354 | 0.002999 | 157313 |
| CDCA2 | UNC1215      | 0.095366 | 0.034307 | 157313 |
| CDCA2 | VNLG/124     | -0.03852 | 0.375278 | 157313 |
| CDCA2 | VX-11e       | 0.078253 | 0.073863 | 157313 |
| CDCA2 | VX-680       | -0.04774 | 0.635282 | 157313 |
| CDCA2 | VX-702       | 0.009242 | 0.978789 | 157313 |
| CDCA2 | Veliparib    | 0.030646 | 0.674069 | 157313 |
| CDCA2 | Vinblastine  | -0.05689 | 0.195075 | 157313 |
| CDCA2 | Vinorelbine  | -0.02501 | 0.68669  | 157313 |
| CDCA2 | Vorinostat   | -0.18083 | 4.31E-07 | 157313 |
| CDCA2 | WH-4-023     | 0.032786 | 0.710206 | 157313 |
| CDCA2 | WZ-1-84      | 0.070225 | 0.368426 | 157313 |
| CDCA2 | WZ3105       | -0.10682 | 0.002502 | 157313 |
| CDCA2 | XAV939       | 0.046316 | 0.246913 | 157313 |
| CDCA2 | XL-184       | -0.04691 | 0.319015 | 157313 |
| CDCA2 | XMD11-85h    | 0.027903 | 0.889602 | 157313 |
| CDCA2 | XMD13-2      | -0.11546 | 0.001111 | 157313 |
| CDCA2 | XMD14-99     | -0.0428  | 0.280342 | 157313 |
| CDCA2 | XMD15-27     | -0.08407 | 0.051699 | 157313 |
| CDCA2 | XMD8-85      | -0.01294 | 0.903739 | 157313 |
| CDCA2 | XMD8-92      | -0.013   | 0.933282 | 157313 |
| CDCA2 | Y-39983      | -0.16846 | 1.94E-06 | 157313 |
| CDCA2 | YK 4-279     | 0.034266 | 0.551397 | 157313 |
| CDCA2 | YM155        | -0.08198 | 0.074229 | 157313 |
| CDCA2 | YM201636     | -0.13876 | 9.19E-05 | 157313 |
| CDCA2 | Z-LLN1e-CHO  | 0.003146 | 0.97421  | 157313 |
| CDCA2 | ZG-10        | -0.09259 | 0.136618 | 157313 |

|       |                    |          |          |        |
|-------|--------------------|----------|----------|--------|
| CDCA2 | ZM-447439          | -0.05703 | 0.214054 | 157313 |
| CDCA2 | ZSTK474            | -0.15106 | 1.75E-05 | 157313 |
| CDCA2 | Zibotentan         | -0.03222 | 0.912262 | 157313 |
| CDCA2 | piperlongumine     | -0.00146 | 0.981545 | 157313 |
| CDCA2 | rTRAIL             | 0.002384 | 0.980991 | 157313 |
| CDCA2 | selumetinib        | 0.202378 | 3.81E-09 | 157313 |
| CDK1  | (5Z)-7-Oxozeaenol  | 0.172772 | 2.02E-06 | 983    |
| CDK1  | 17-AAG             | 0.158261 | 1.24E-05 | 983    |
| CDK1  | 5-Fluorouracil     | -0.00799 | 0.847245 | 983    |
| CDK1  | 681640             | -0.01302 | 0.858135 | 983    |
| CDK1  | A-443654           | -0.04182 | 0.829446 | 983    |
| CDK1  | A-770041           | -0.05273 | 0.537015 | 983    |
| CDK1  | AC220              | 0.002804 | 0.969529 | 983    |
| CDK1  | AG-014699          | 0.053846 | 0.206906 | 983    |
| CDK1  | AICAR              | -0.13437 | 0.000409 | 983    |
| CDK1  | AKT inhibitor VIII | 0.069197 | 0.113972 | 983    |
| CDK1  | AMG-706            | 0.066391 | 0.221527 | 983    |
| CDK1  | AP-24534           | -0.01311 | 0.788653 | 983    |
| CDK1  | AR-42              | -0.10077 | 0.004714 | 983    |
| CDK1  | AS601245           | 0.064425 | 0.20496  | 983    |
| CDK1  | AS605240           | 0.011326 | 0.827666 | 983    |
| CDK1  | AT-7519            | -0.12071 | 0.000607 | 983    |
| CDK1  | ATRA               | -0.01906 | 0.739821 | 983    |
| CDK1  | AUY922             | 0.046092 | 0.378785 | 983    |
| CDK1  | AZ628              | 0.172251 | 0.006652 | 983    |
| CDK1  | AZD6482            | 0.066374 | 0.12567  | 983    |
| CDK1  | AZD7762            | -0.1035  | 0.007762 | 983    |
| CDK1  | AZD8055            | -0.05557 | 0.168001 | 983    |
| CDK1  | Afatinib           | 0.040033 | 0.301972 | 983    |
| CDK1  | Axitinib           | -0.03205 | 0.573863 | 983    |
| CDK1  | BAY 61-3606        | 0.007878 | 0.87289  | 983    |
| CDK1  | BEZ235             | 0.038468 | 0.449998 | 983    |
| CDK1  | BHG712             | -0.018   | 0.650549 | 983    |
| CDK1  | BI-2536            | -0.09069 | 0.337273 | 983    |
| CDK1  | BIRB 0796          | 0.066519 | 0.175431 | 983    |
| CDK1  | BIX02189           | -0.03561 | 0.356424 | 983    |
| CDK1  | BMS-509744         | 0.041537 | 0.673367 | 983    |
| CDK1  | BMS-536924         | 0.012558 | 0.89367  | 983    |
| CDK1  | BMS-708163         | 0.07244  | 0.067244 | 983    |
| CDK1  | BMS-754807         | 0.046164 | 0.397845 | 983    |
| CDK1  | BMS345541          | -0.12703 | 0.00031  | 983    |
| CDK1  | BX-795             | -0.0194  | 0.71773  | 983    |
| CDK1  | BX-912             | -0.11117 | 0.001588 | 983    |
| CDK1  | Belinostat         | -0.07952 | 0.032383 | 983    |
| CDK1  | Bexarotene         | 0.034476 | 0.663467 | 983    |
| CDK1  | Bicalutamide       | 0.025305 | 0.606194 | 983    |
| CDK1  | Bleomycin          | 0.083449 | 0.088606 | 983    |
| CDK1  | Bleomycin (50 uM)  | 0.11313  | 0.001513 | 983    |
| CDK1  | Bortezomib         | 0.052263 | 0.534312 | 983    |
| CDK1  | Bosutinib          | -0.00909 | 0.89366  | 983    |

|      |              |          |          |     |
|------|--------------|----------|----------|-----|
| CDK1 | Bryostatin 1 | 0.066747 | 0.172717 | 983 |
| CDK1 | CAL-101      | -0.05845 | 0.127186 | 983 |
| CDK1 | CAY10603     | -0.08996 | 0.011964 | 983 |
| CDK1 | CCT007093    | 0.059566 | 0.165962 | 983 |
| CDK1 | CCT018159    | 0.016849 | 0.784875 | 983 |
| CDK1 | CEP-701      | -0.02791 | 0.529351 | 983 |
| CDK1 | CGP-082996   | -0.03651 | 0.738624 | 983 |
| CDK1 | CGP-60474    | 0.025678 | 0.802919 | 983 |
| CDK1 | CH5424802    | -0.00274 | 0.974402 | 983 |
| CDK1 | CHIR-99021   | 0.081604 | 0.029478 | 983 |
| CDK1 | CI-1040      | 0.115051 | 0.004028 | 983 |
| CDK1 | CMK          | -0.00638 | 0.967322 | 983 |
| CDK1 | CP466722     | -0.09638 | 0.006875 | 983 |
| CDK1 | CP724714     | -0.00713 | 0.9231   | 983 |
| CDK1 | CUDC-101     | -0.10677 | 0.003201 | 983 |
| CDK1 | CX-5461      | -0.09539 | 0.008515 | 983 |
| CDK1 | Camptothecin | -0.04903 | 0.274415 | 983 |
| CDK1 | Cetuximab    | 0.053364 | 0.196898 | 983 |
| CDK1 | Cisplatin    | 0.019362 | 0.737092 | 983 |
| CDK1 | Crizotinib   | -0.01237 | 0.955692 | 983 |
| CDK1 | Cyclopamine  | 0.00557  | 0.968941 | 983 |
| CDK1 | Cytarabine   | -0.02564 | 0.651639 | 983 |
| CDK1 | DMOG         | -0.01656 | 0.759859 | 983 |
| CDK1 | Dabrafenib   | 0.155776 | 4.09E-05 | 983 |
| CDK1 | Dasatinib    | 0.02059  | 0.790974 | 983 |
| CDK1 | Docetaxel    | 0.060351 | 0.113679 | 983 |
| CDK1 | Doxorubicin  | 0.020895 | 0.781579 | 983 |
| CDK1 | EHT 1864     | 0.043589 | 0.505634 | 983 |
| CDK1 | EKB-569      | -0.06162 | 0.123845 | 983 |
| CDK1 | EX-527       | 0.001283 | 0.99329  | 983 |
| CDK1 | Elesclomol   | -0.02744 | 0.572222 | 983 |
| CDK1 | Embelin      | 0.016481 | 0.82521  | 983 |
| CDK1 | Epothilone B | 0.020427 | 0.726623 | 983 |
| CDK1 | Erlotinib    | 0.085625 | 0.238772 | 983 |
| CDK1 | Etoposide    | -0.06593 | 0.14314  | 983 |
| CDK1 | FH535        | 0.080396 | 0.068753 | 983 |
| CDK1 | FK866        | -0.11744 | 0.00099  | 983 |
| CDK1 | FMK          | 0.044104 | 0.519834 | 983 |
| CDK1 | FR-180204    | 0.041593 | 0.433944 | 983 |
| CDK1 | FTI-277      | 0.160255 | 3.36E-05 | 983 |
| CDK1 | Foretinib    | -0.03842 | 0.378662 | 983 |
| CDK1 | GDC0449      | 0.037304 | 0.711235 | 983 |
| CDK1 | GDC0941      | -0.03512 | 0.556146 | 983 |
| CDK1 | GNF-2        | -0.0239  | 0.934089 | 983 |
| CDK1 | GSK-650394   | -0.00299 | 0.976576 | 983 |
| CDK1 | GSK1070916   | -0.1247  | 0.000509 | 983 |
| CDK1 | GSK1904529A  | 0.050554 | 0.27117  | 983 |
| CDK1 | GSK2126458   | -0.08019 | 0.031149 | 983 |
| CDK1 | GSK269962A   | 0.065162 | 0.165704 | 983 |
| CDK1 | GSK429286A   | -0.06388 | 0.117764 | 983 |

|      |                    |          |          |     |
|------|--------------------|----------|----------|-----|
| CDK1 | GSK690693          | -0.14489 | 4.35E-05 | 983 |
| CDK1 | GW 441756          | -0.00412 | 0.994189 | 983 |
| CDK1 | GW-2580            | 0.039146 | 0.91569  | 983 |
| CDK1 | GW843682X          | -0.11331 | 0.145083 | 983 |
| CDK1 | Gefitinib          | 0.056799 | 0.173065 | 983 |
| CDK1 | Gemcitabine        | -0.04441 | 0.376003 | 983 |
| CDK1 | Genentech Cpd 10   | -0.10181 | 0.004882 | 983 |
| CDK1 | HG-5-113-01        | -0.01832 | 0.834416 | 983 |
| CDK1 | HG-5-88-01         | 0.04499  | 0.773421 | 983 |
| CDK1 | HG-6-64-1          | 0.074673 | 0.092341 | 983 |
| CDK1 | I-BET-762          | -0.08828 | 0.012039 | 983 |
| CDK1 | IOX2               | 0.008745 | 0.909945 | 983 |
| CDK1 | IPA-3              | -0.07076 | 0.071922 | 983 |
| CDK1 | Imatinib           | -0.04411 | 0.79589  | 983 |
| CDK1 | Ispinesib Mesylate | -0.05142 | 0.173639 | 983 |
| CDK1 | JNJ-26854165       | 0.047717 | 0.346963 | 983 |
| CDK1 | JNK Inhibitor VIII | 0.043837 | 0.317784 | 983 |
| CDK1 | JNK-9L             | 0.034675 | 0.565764 | 983 |
| CDK1 | JQ1                | 0.01982  | 0.681389 | 983 |
| CDK1 | JQ12               | 0.020536 | 0.742929 | 983 |
| CDK1 | JW-7-24-1          | -0.0856  | 0.016866 | 983 |
| CDK1 | JW-7-52-1          | -0.0132  | 0.921887 | 983 |
| CDK1 | KIN001-055         | 0.031128 | 0.654803 | 983 |
| CDK1 | KIN001-102         | -0.12871 | 0.000231 | 983 |
| CDK1 | KIN001-135         | 0.08779  | 0.352689 | 983 |
| CDK1 | KIN001-236         | -0.03866 | 0.32014  | 983 |
| CDK1 | KIN001-244         | -0.05939 | 0.113313 | 983 |
| CDK1 | KIN001-260         | -0.02827 | 0.470487 | 983 |
| CDK1 | KIN001-266         | -0.03029 | 0.555114 | 983 |
| CDK1 | KIN001-270         | -0.0994  | 0.008578 | 983 |
| CDK1 | KU-55933           | -0.04987 | 0.396553 | 983 |
| CDK1 | LAQ824             | -0.08642 | 0.025827 | 983 |
| CDK1 | LFM-A13            | 0.085013 | 0.068776 | 983 |
| CDK1 | LY317615           | -0.04482 | 0.31549  | 983 |
| CDK1 | Lapatinib          | 0.087453 | 0.166652 | 983 |
| CDK1 | Lenalidomide       | 0.00119  | 0.991669 | 983 |
| CDK1 | Linifanib          | 0.028619 | 0.616649 | 983 |
| CDK1 | Lisitinib          | 0.032957 | 0.633911 | 983 |
| CDK1 | MG-132             | 0.063233 | 0.478385 | 983 |
| CDK1 | MK-2206            | -0.08886 | 0.059568 | 983 |
| CDK1 | MLN4924            | 0.084041 | 0.108304 | 983 |
| CDK1 | MP470              | -0.06071 | 0.156669 | 983 |
| CDK1 | MPS-1-IN-1         | -0.0474  | 0.223297 | 983 |
| CDK1 | MS-275             | -0.11436 | 0.119222 | 983 |
| CDK1 | Masitinib          | -0.02973 | 0.462715 | 983 |
| CDK1 | Methotrexate       | -0.08449 | 0.022997 | 983 |
| CDK1 | Midostaurin        | 0.07559  | 0.076639 | 983 |
| CDK1 | Mitomycin C        | -0.01151 | 0.854461 | 983 |
| CDK1 | NG-25              | -0.07382 | 0.042002 | 983 |
| CDK1 | NPK76-III-72-1     | -0.15108 | 1.16E-05 | 983 |

|      |                     |          |          |     |
|------|---------------------|----------|----------|-----|
| CDK1 | NSC-207895          | -0.12756 | 0.001291 | 983 |
| CDK1 | NSC-87877           | 0.081996 | 0.111565 | 983 |
| CDK1 | NU-7441             | -0.00181 | 0.986645 | 983 |
| CDK1 | Navitoclax          | -0.16309 | 6.23E-06 | 983 |
| CDK1 | Nilotinib           | -0.04473 | 0.391039 | 983 |
| CDK1 | Nutlin-3a (-)       | 0.144797 | 0.000399 | 983 |
| CDK1 | OSI-027             | -0.08458 | 0.019247 | 983 |
| CDK1 | OSI-930             | -0.03143 | 0.44913  | 983 |
| CDK1 | OSU-03012           | -0.0292  | 0.589908 | 983 |
| CDK1 | Obatoclax Mesylate  | 0.024797 | 0.639695 | 983 |
| CDK1 | Olaparib            | 0.031719 | 0.493313 | 983 |
| CDK1 | PAC-1               | -0.05096 | 0.235056 | 983 |
| CDK1 | PD-0325901          | 0.176233 | 2.24E-06 | 983 |
| CDK1 | PD-0332991          | 0.050224 | 0.35836  | 983 |
| CDK1 | PD-173074           | -0.00319 | 0.991024 | 983 |
| CDK1 | PF-4708671          | 0.07321  | 0.387433 | 983 |
| CDK1 | PF-562271           | 0.04215  | 0.456784 | 983 |
| CDK1 | PFI-1               | 0.049092 | 0.305921 | 983 |
| CDK1 | PHA-665752          | 0.081721 | 0.550842 | 983 |
| CDK1 | PHA-793887          | -0.11037 | 0.001594 | 983 |
| CDK1 | PI-103              | -0.09976 | 0.005379 | 983 |
| CDK1 | PIK-93              | -0.10545 | 0.00271  | 983 |
| CDK1 | PLX4720             | 0.148691 | 5.06E-05 | 983 |
| CDK1 | Paclitaxel          | -0.01453 | 0.926965 | 983 |
| CDK1 | Parthenolide        | -0.01655 | 0.899876 | 983 |
| CDK1 | Pazopanib           | 0.068264 | 0.181468 | 983 |
| CDK1 | Phenformin          | -0.05338 | 0.160554 | 983 |
| CDK1 | Pyrimethamine       | -0.02107 | 0.882179 | 983 |
| CDK1 | QL-VIII-58          | 0.046307 | 0.569    | 983 |
| CDK1 | QL-X-138            | -0.12113 | 0.000721 | 983 |
| CDK1 | QL-XI-92            | -0.08809 | 0.014542 | 983 |
| CDK1 | QL-XII-47           | -0.08129 | 0.03632  | 983 |
| CDK1 | QL-XII-61           | -0.09044 | 0.145016 | 983 |
| CDK1 | QS11                | -0.05248 | 0.38162  | 983 |
| CDK1 | RDEA119             | 0.2087   | 1.03E-09 | 983 |
| CDK1 | RO-3306             | 0.069381 | 0.096335 | 983 |
| CDK1 | Rapamycin           | -0.05976 | 0.615582 | 983 |
| CDK1 | Roscovitine         | 0.090767 | 0.546252 | 983 |
| CDK1 | Ruxolitinib         | -0.01153 | 0.861297 | 983 |
| CDK1 | S-Trityl-L-cysteine | -0.03258 | 0.730867 | 983 |
| CDK1 | SB 216763           | 0.069555 | 0.149211 | 983 |
| CDK1 | SB 505124           | 0.036968 | 0.633335 | 983 |
| CDK1 | SB52334             | 0.031645 | 0.539096 | 983 |
| CDK1 | SB590885            | 0.165666 | 3.76E-05 | 983 |
| CDK1 | SGC0946             | 0.041713 | 0.441302 | 983 |
| CDK1 | SL 0101-1           | 0.085487 | 0.243324 | 983 |
| CDK1 | SN-38               | 0.021923 | 0.661797 | 983 |
| CDK1 | SNX-2112            | -0.06826 | 0.064265 | 983 |
| CDK1 | STF-62247           | -0.00792 | 0.874075 | 983 |
| CDK1 | Salubrinal          | 0.010094 | 0.927962 | 983 |



|      |              |          |          |     |
|------|--------------|----------|----------|-----|
| CDK1 | Saracatinib  | -0.03137 | 0.737717 | 983 |
| CDK1 | Shikonin     | -0.04014 | 0.463475 | 983 |
| CDK1 | Sorafenib    | 0.043842 | 0.715299 | 983 |
| CDK1 | Sunitinib    | -0.027   | 0.759165 | 983 |
| CDK1 | T0901317     | -0.07953 | 0.044574 | 983 |
| CDK1 | TAE684       | 0.028336 | 0.83596  | 983 |
| CDK1 | TAK-715      | -0.08556 | 0.018053 | 983 |
| CDK1 | TG101348     | -0.07263 | 0.044829 | 983 |
| CDK1 | TGX221       | 0.149812 | 0.013451 | 983 |
| CDK1 | THZ-2-102-1  | -0.11515 | 0.001235 | 983 |
| CDK1 | THZ-2-49     | -0.05011 | 0.187138 | 983 |
| CDK1 | TL-1-85      | -0.06568 | 0.074159 | 983 |
| CDK1 | TL-2-105     | -0.0838  | 0.023203 | 983 |
| CDK1 | TPCA-1       | -0.09153 | 0.00984  | 983 |
| CDK1 | TW 37        | -0.05927 | 0.184542 | 983 |
| CDK1 | Talazoparib  | 0.031071 | 0.519518 | 983 |
| CDK1 | Tamoxifen    | 0.021414 | 0.879546 | 983 |
| CDK1 | Temozolomide | 0.052773 | 0.429114 | 983 |
| CDK1 | Temsirolimus | -0.03051 | 0.57195  | 983 |
| CDK1 | Thapsigargin | 0.019414 | 0.809418 | 983 |
| CDK1 | Tipifarnib   | 0.034471 | 0.624002 | 983 |
| CDK1 | Tivozanib    | -0.01422 | 0.845878 | 983 |
| CDK1 | Trametinib   | 0.238988 | 5.56E-12 | 983 |
| CDK1 | Tubastatin A | -0.05661 | 0.121874 | 983 |
| CDK1 | UNC0638      | -0.02928 | 0.43719  | 983 |
| CDK1 | UNC1215      | 0.108034 | 0.01538  | 983 |
| CDK1 | VNLG/124     | -0.00495 | 0.923793 | 983 |
| CDK1 | VX-11e       | 0.100375 | 0.017199 | 983 |
| CDK1 | VX-680       | -0.08265 | 0.353554 | 983 |
| CDK1 | VX-702       | 0.016316 | 0.950801 | 983 |
| CDK1 | Veliparib    | 0.025055 | 0.738955 | 983 |
| CDK1 | Vinblastine  | -0.01488 | 0.776547 | 983 |
| CDK1 | Vinorelbine  | -0.0255  | 0.679171 | 983 |
| CDK1 | Vorinostat   | -0.17573 | 9.3E-07  | 983 |
| CDK1 | WH-4-023     | 0.04581  | 0.583777 | 983 |
| CDK1 | WZ-1-84      | 0.035136 | 0.686136 | 983 |
| CDK1 | WZ3105       | -0.11304 | 0.001329 | 983 |
| CDK1 | XAV939       | 0.046498 | 0.245144 | 983 |
| CDK1 | XL-184       | 0.001955 | 0.973989 | 983 |
| CDK1 | XMD11-85h    | 0.068858 | 0.656339 | 983 |
| CDK1 | XMD13-2      | -0.06095 | 0.096227 | 983 |
| CDK1 | XMD14-99     | 0.020464 | 0.629016 | 983 |
| CDK1 | XMD15-27     | -0.00367 | 0.952979 | 983 |
| CDK1 | XMD8-85      | 0.064247 | 0.442249 | 983 |
| CDK1 | XMD8-92      | 0.012524 | 0.935321 | 983 |
| CDK1 | Y-39983      | -0.08543 | 0.020957 | 983 |
| CDK1 | YK 4-279     | 0.066418 | 0.186093 | 983 |
| CDK1 | YM155        | -0.06594 | 0.169247 | 983 |
| CDK1 | YM201636     | -0.09146 | 0.011838 | 983 |
| CDK1 | Z-LLN1e-CHO  | 0.023174 | 0.792014 | 983 |

|       |                    |          |          |      |
|-------|--------------------|----------|----------|------|
| CDK1  | ZG-10              | -0.03042 | 0.688341 | 983  |
| CDK1  | ZM-447439          | -0.06389 | 0.156544 | 983  |
| CDK1  | ZSTK474            | -0.10704 | 0.0028   | 983  |
| CDK1  | Zibotentan         | 0.008119 | 0.987731 | 983  |
| CDK1  | piperlongumine     | 0.05851  | 0.171487 | 983  |
| CDK1  | rTRAIL             | 0.053734 | 0.442152 | 983  |
| CDK1  | selumetinib        | 0.219792 | 1.26E-10 | 983  |
| CENPA | (5Z)-7-oxozeaenol  | 0.140186 | 0.000155 | 1058 |
| CENPA | 17-AAG             | 0.115227 | 0.001728 | 1058 |
| CENPA | 5-Fluorouracil     | 0.061247 | 0.098826 | 1058 |
| CENPA | 681640             | -0.0181  | 0.793773 | 1058 |
| CENPA | A-443654           | -0.02495 | 0.913117 | 1058 |
| CENPA | A-770041           | -0.00623 | 0.954775 | 1058 |
| CENPA | AC220              | 0.002501 | 0.972824 | 1058 |
| CENPA | AG-014699          | 0.047315 | 0.274656 | 1058 |
| CENPA | AICAR              | -0.08567 | 0.028883 | 1058 |
| CENPA | AKT inhibitor VIII | 0.080748 | 0.060541 | 1058 |
| CENPA | AMG-706            | 0.017108 | 0.814632 | 1058 |
| CENPA | AP-24534           | -0.00534 | 0.918065 | 1058 |
| CENPA | AR-42              | -0.02838 | 0.458321 | 1058 |
| CENPA | AS601245           | 0.057846 | 0.264692 | 1058 |
| CENPA | AS605240           | 0.028886 | 0.53719  | 1058 |
| CENPA | AT-7519            | -0.03144 | 0.408251 | 1058 |
| CENPA | ATRA               | -0.05104 | 0.296174 | 1058 |
| CENPA | AUY922             | 0.051212 | 0.316271 | 1058 |
| CENPA | AZ628              | 0.13697  | 0.038921 | 1058 |
| CENPA | AZD6482            | 0.033193 | 0.507513 | 1058 |
| CENPA | AZD7762            | -0.10196 | 0.008797 | 1058 |
| CENPA | AZD8055            | -0.04368 | 0.287786 | 1058 |
| CENPA | Afatinib           | 0.059062 | 0.116061 | 1058 |
| CENPA | Axitinib           | -0.02514 | 0.676628 | 1058 |
| CENPA | BAY 61-3606        | 0.04789  | 0.253529 | 1058 |
| CENPA | BEZ235             | 0.025606 | 0.638697 | 1058 |
| CENPA | BHG712             | 0.010795 | 0.791025 | 1058 |
| CENPA | BI-2536            | -0.05434 | 0.616231 | 1058 |
| CENPA | BIRB 0796          | 0.023502 | 0.682023 | 1058 |
| CENPA | BIX02189           | -0.0275  | 0.483657 | 1058 |
| CENPA | BMS-509744         | 0.022098 | 0.839988 | 1058 |
| CENPA | BMS-536924         | 0.007371 | 0.940502 | 1058 |
| CENPA | BMS-708163         | 0.055231 | 0.172942 | 1058 |
| CENPA | BMS-754807         | 0.060684 | 0.244297 | 1058 |
| CENPA | BMS345541          | -0.05843 | 0.112028 | 1058 |
| CENPA | BX-795             | -0.02585 | 0.616507 | 1058 |
| CENPA | BX-912             | -0.04348 | 0.239897 | 1058 |
| CENPA | Belinostat         | -0.01074 | 0.798728 | 1058 |
| CENPA | Bexarotene         | -0.00383 | 0.974622 | 1058 |
| CENPA | Bicalutamide       | 0.014107 | 0.788651 | 1058 |
| CENPA | Bleomycin          | 0.070852 | 0.161694 | 1058 |
| CENPA | Bleomycin (50 uM)  | 0.091348 | 0.01122  | 1058 |
| CENPA | Bortezomib         | 0.041722 | 0.636714 | 1058 |

|       |                  |          |          |      |
|-------|------------------|----------|----------|------|
| CENPA | Bosutinib        | -0.03654 | 0.518302 | 1058 |
| CENPA | Bryostatins 1    | 0.054551 | 0.282833 | 1058 |
| CENPA | CAL-101          | -0.00508 | 0.91038  | 1058 |
| CENPA | CAY10603         | -0.01866 | 0.634585 | 1058 |
| CENPA | CCT007093        | 0.045185 | 0.311284 | 1058 |
| CENPA | CCT018159        | 0.017029 | 0.781968 | 1058 |
| CENPA | CEP-701          | -0.03758 | 0.382587 | 1058 |
| CENPA | CGP-082996       | -0.03658 | 0.738333 | 1058 |
| CENPA | CGP-60474        | 0.036847 | 0.703677 | 1058 |
| CENPA | CH5424802        | -0.00414 | 0.960907 | 1058 |
| CENPA | CHIR-99021       | 0.046032 | 0.242905 | 1058 |
| CENPA | CI-1040          | 0.114804 | 0.004118 | 1058 |
| CENPA | CMK              | 0.085272 | 0.418731 | 1058 |
| CENPA | CP466722         | -0.05302 | 0.150724 | 1058 |
| CENPA | CP724714         | 0.068499 | 0.161393 | 1058 |
| CENPA | CUDC-101         | -0.02176 | 0.589616 | 1058 |
| CENPA | CX-5461          | -0.04208 | 0.273002 | 1058 |
| CENPA | Camptothecin     | -0.03843 | 0.408577 | 1058 |
| CENPA | Cetuximab        | 0.043375 | 0.302892 | 1058 |
| CENPA | Cisplatin        | -0.01302 | 0.8311   | 1058 |
| CENPA | Crizotinib       | 0.00532  | 0.983743 | 1058 |
| CENPA | Cyclophosphamide | 0.087887 | 0.361637 | 1058 |
| CENPA | Cytarabine       | -0.02639 | 0.640675 | 1058 |
| CENPA | DMOG             | -0.01439 | 0.793903 | 1058 |
| CENPA | Dabrafenib       | 0.086627 | 0.033274 | 1058 |
| CENPA | Dasatinib        | 0.041976 | 0.559544 | 1058 |
| CENPA | Docetaxel        | 0.038997 | 0.31856  | 1058 |
| CENPA | Doxorubicin      | 0.02247  | 0.762512 | 1058 |
| CENPA | EHT 1864         | 0.034892 | 0.62018  | 1058 |
| CENPA | EKB-569          | -0.01673 | 0.71973  | 1058 |
| CENPA | EX-527           | -0.04147 | 0.695894 | 1058 |
| CENPA | Elesclomol       | -0.05616 | 0.205541 | 1058 |
| CENPA | Embelin          | 0.050241 | 0.380301 | 1058 |
| CENPA | Epothilone B     | 0.024457 | 0.666036 | 1058 |
| CENPA | Erlotinib        | 0.057873 | 0.439286 | 1058 |
| CENPA | Etoposide        | -0.0526  | 0.261243 | 1058 |
| CENPA | FH535            | 0.08317  | 0.058131 | 1058 |
| CENPA | FK866            | -0.06101 | 0.100096 | 1058 |
| CENPA | FMK              | 0.004662 | 0.959615 | 1058 |
| CENPA | FR-180204        | 0.027568 | 0.635637 | 1058 |
| CENPA | FTI-277          | 0.12593  | 0.001326 | 1058 |
| CENPA | Foretinib        | 0.007298 | 0.884637 | 1058 |
| CENPA | GDC0449          | 0.031032 | 0.772887 | 1058 |
| CENPA | GDC0941          | -0.02575 | 0.688083 | 1058 |
| CENPA | GNF-2            | -0.04102 | 0.876686 | 1058 |
| CENPA | GSK-650394       | 0.006639 | 0.949196 | 1058 |
| CENPA | GSK1070916       | -0.06874 | 0.065175 | 1058 |
| CENPA | GSK1904529A      | 0.026651 | 0.595963 | 1058 |
| CENPA | GSK2126458       | -0.01352 | 0.751816 | 1058 |
| CENPA | GSK269962A       | 0.079116 | 0.077904 | 1058 |

|       |                    |          |          |      |
|-------|--------------------|----------|----------|------|
| CENPA | GSK429286A         | -0.02538 | 0.580392 | 1058 |
| CENPA | GSK690693          | -0.09037 | 0.013334 | 1058 |
| CENPA | GW 441756          | -0.06103 | 0.678263 | 1058 |
| CENPA | GW-2580            | 0.022375 | 0.967411 | 1058 |
| CENPA | GW843682X          | -0.06362 | 0.477124 | 1058 |
| CENPA | Gefitinib          | 0.063459 | 0.124813 | 1058 |
| CENPA | Gemcitabine        | -0.05028 | 0.305976 | 1058 |
| CENPA | Genentech Cpd 10   | -0.06516 | 0.080969 | 1058 |
| CENPA | HG-5-113-01        | -0.01217 | 0.895432 | 1058 |
| CENPA | HG-5-88-01         | 0.062328 | 0.640517 | 1058 |
| CENPA | HG-6-64-1          | 0.052177 | 0.271918 | 1058 |
| CENPA | I-BET-762          | -0.02562 | 0.494922 | 1058 |
| CENPA | IOX2               | -0.01318 | 0.857877 | 1058 |
| CENPA | IPA-3              | -0.01958 | 0.657918 | 1058 |
| CENPA | Imatinib           | -0.01945 | 0.918989 | 1058 |
| CENPA | Ispinesib Mesylate | -0.00436 | 0.917987 | 1058 |
| CENPA | JNJ-26854165       | 0.003384 | 0.963452 | 1058 |
| CENPA | JNK Inhibitor VIII | 0.015188 | 0.752315 | 1058 |
| CENPA | JNK-9L             | 0.064688 | 0.213763 | 1058 |
| CENPA | JQ1                | 0.045799 | 0.292106 | 1058 |
| CENPA | JQ12               | 0.048839 | 0.366616 | 1058 |
| CENPA | JW-7-24-1          | -0.03845 | 0.307269 | 1058 |
| CENPA | JW-7-52-1          | 0.023753 | 0.84771  | 1058 |
| CENPA | KIN001-055         | 0.0194   | 0.807385 | 1058 |
| CENPA | KIN001-102         | -0.05068 | 0.168268 | 1058 |
| CENPA | KIN001-135         | 0.082836 | 0.386588 | 1058 |
| CENPA | KIN001-236         | 0.00318  | 0.943815 | 1058 |
| CENPA | KIN001-244         | -0.00852 | 0.841979 | 1058 |
| CENPA | KIN001-260         | -0.01949 | 0.628234 | 1058 |
| CENPA | KIN001-266         | 0.019593 | 0.71592  | 1058 |
| CENPA | KIN001-270         | -0.03768 | 0.361894 | 1058 |
| CENPA | KU-55933           | -0.05083 | 0.385496 | 1058 |
| CENPA | LAQ824             | -0.02665 | 0.534871 | 1058 |
| CENPA | LFM-A13            | 0.040023 | 0.447099 | 1058 |
| CENPA | LY317615           | -0.00452 | 0.936496 | 1058 |
| CENPA | Lapatinib          | 0.077376 | 0.226059 | 1058 |
| CENPA | Lenalidomide       | -0.04134 | 0.583835 | 1058 |
| CENPA | Linifanib          | 0.025544 | 0.664397 | 1058 |
| CENPA | Lisitinib          | 0.033336 | 0.628956 | 1058 |
| CENPA | MG-132             | 0.030885 | 0.771443 | 1058 |
| CENPA | MK-2206            | -0.0638  | 0.19773  | 1058 |
| CENPA | MLN4924            | 0.035241 | 0.559105 | 1058 |
| CENPA | MP470              | -0.00466 | 0.930618 | 1058 |
| CENPA | MPS-1-IN-1         | 0.014719 | 0.73105  | 1058 |
| CENPA | MS-275             | -0.08759 | 0.259917 | 1058 |
| CENPA | Masitinib          | -0.00325 | 0.943371 | 1058 |
| CENPA | Methotrexate       | -0.05305 | 0.165411 | 1058 |
| CENPA | Midostaurin        | 0.069311 | 0.108486 | 1058 |
| CENPA | Mitomycin C        | -0.0099  | 0.877011 | 1058 |
| CENPA | NG-25              | -0.02535 | 0.516518 | 1058 |

|       |                     |          |          |      |
|-------|---------------------|----------|----------|------|
| CENPA | NPK76-II-72-1       | -0.10085 | 0.004069 | 1058 |
| CENPA | NSC-207895          | -0.09011 | 0.02851  | 1058 |
| CENPA | NSC-87877           | 0.035875 | 0.539601 | 1058 |
| CENPA | NU-7441             | -0.01119 | 0.914306 | 1058 |
| CENPA | Navitoclax          | -0.14263 | 8.75E-05 | 1058 |
| CENPA | Nilotinib           | -0.03417 | 0.533791 | 1058 |
| CENPA | Nutlin-3a (-)       | 0.123451 | 0.003045 | 1058 |
| CENPA | OSI-027             | -0.02247 | 0.569101 | 1058 |
| CENPA | OSI-930             | 0.019713 | 0.650364 | 1058 |
| CENPA | OSU-03012           | 0.024493 | 0.659374 | 1058 |
| CENPA | Obatoclax Mesylate  | 0.046236 | 0.335438 | 1058 |
| CENPA | Olaparib            | 0.031329 | 0.498896 | 1058 |
| CENPA | PAC-1               | -0.02679 | 0.565977 | 1058 |
| CENPA | PD-0325901          | 0.168974 | 6.1E-06  | 1058 |
| CENPA | PD-0332991          | 0.047455 | 0.390446 | 1058 |
| CENPA | PD-173074           | 0.004404 | 0.989461 | 1058 |
| CENPA | PF-4708671          | 0.053401 | 0.555034 | 1058 |
| CENPA | PF-562271           | 0.059031 | 0.270822 | 1058 |
| CENPA | PFI-1               | 0.085806 | 0.050324 | 1058 |
| CENPA | PHA-665752          | 0.054146 | 0.714723 | 1058 |
| CENPA | PHA-793887          | -0.01592 | 0.68153  | 1058 |
| CENPA | PI-103              | -0.03545 | 0.354143 | 1058 |
| CENPA | PIK-93              | -0.05831 | 0.108142 | 1058 |
| CENPA | PLX4720             | 0.081646 | 0.03936  | 1058 |
| CENPA | Paclitaxel          | 0.02449  | 0.862917 | 1058 |
| CENPA | Parthenolide        | 0.047961 | 0.658302 | 1058 |
| CENPA | Pazopanib           | 0.057087 | 0.280638 | 1058 |
| CENPA | Phenformin          | -0.04285 | 0.268101 | 1058 |
| CENPA | Pyrimethamine       | -0.02729 | 0.836144 | 1058 |
| CENPA | QL-VIII-58          | 0.015895 | 0.874672 | 1058 |
| CENPA | QL-X-138            | -0.05179 | 0.170603 | 1058 |
| CENPA | QL-XI-92            | -0.02231 | 0.575114 | 1058 |
| CENPA | QL-XII-47           | -7.1E-06 | 0.999885 | 1058 |
| CENPA | QL-XII-61           | -0.05109 | 0.462902 | 1058 |
| CENPA | QS11                | -0.0145  | 0.854417 | 1058 |
| CENPA | RDEA119             | 0.207187 | 1.38E-09 | 1058 |
| CENPA | RO-3306             | 0.035629 | 0.416123 | 1058 |
| CENPA | Rapamycin           | -0.05028 | 0.688205 | 1058 |
| CENPA | Roscovitine         | 0.145171 | 0.242524 | 1058 |
| CENPA | Ruxolitinib         | -0.03957 | 0.451517 | 1058 |
| CENPA | S-Trityl-L-cysteine | 0.009282 | 0.933947 | 1058 |
| CENPA | SB 216763           | 0.072373 | 0.131596 | 1058 |
| CENPA | SB 505124           | 0.057433 | 0.40608  | 1058 |
| CENPA | SB52334             | 0.00102  | 0.989081 | 1058 |
| CENPA | SB590885            | 0.112111 | 0.010052 | 1058 |
| CENPA | SGC0946             | 0.042956 | 0.424625 | 1058 |
| CENPA | SL 0101-1           | 0.043604 | 0.571645 | 1058 |
| CENPA | SN-38               | 0.021912 | 0.661936 | 1058 |
| CENPA | SNX-2112            | 0.009229 | 0.826804 | 1058 |
| CENPA | STF-62247           | -0.01566 | 0.738043 | 1058 |

|       |              |          |          |      |
|-------|--------------|----------|----------|------|
| CENPA | Salubrinal   | 0.045046 | 0.621127 | 1058 |
| CENPA | Saracatinib  | -0.02319 | 0.810634 | 1058 |
| CENPA | Shikonin     | 0.005377 | 0.938151 | 1058 |
| CENPA | Sorafenib    | 0.064537 | 0.544081 | 1058 |
| CENPA | Sunitinib    | 0.001081 | 0.99268  | 1058 |
| CENPA | T0901317     | 0.010632 | 0.827102 | 1058 |
| CENPA | TAE684       | -0.00868 | 0.96026  | 1058 |
| CENPA | TAK-715      | -0.03673 | 0.338737 | 1058 |
| CENPA | TG101348     | -0.03488 | 0.358568 | 1058 |
| CENPA | TGX221       | 0.123119 | 0.046849 | 1058 |
| CENPA | THZ-2-102-1  | -0.06435 | 0.080122 | 1058 |
| CENPA | THZ-2-49     | -0.02382 | 0.552276 | 1058 |
| CENPA | TL-1-85      | -0.02871 | 0.461782 | 1058 |
| CENPA | TL-2-105     | -0.04448 | 0.250178 | 1058 |
| CENPA | TPCA-1       | -0.05985 | 0.098834 | 1058 |
| CENPA | TW 37        | -0.05677 | 0.207429 | 1058 |
| CENPA | Talazoparib  | 0.030625 | 0.526908 | 1058 |
| CENPA | Tamoxifen    | 0.02991  | 0.815232 | 1058 |
| CENPA | Temozolomide | 0.016401 | 0.854098 | 1058 |
| CENPA | Temsirolimus | -0.03693 | 0.478215 | 1058 |
| CENPA | Thapsigargin | 0.040806 | 0.537036 | 1058 |
| CENPA | Tipifarnib   | 0.055114 | 0.368237 | 1058 |
| CENPA | Tivozanib    | -0.02553 | 0.695062 | 1058 |
| CENPA | Trametinib   | 0.230108 | 3.58E-11 | 1058 |
| CENPA | Tubastatin A | 0.005945 | 0.885556 | 1058 |
| CENPA | UNC0638      | -0.01688 | 0.665632 | 1058 |
| CENPA | UNC1215      | 0.08852  | 0.051712 | 1058 |
| CENPA | VNLG/124     | -0.00595 | 0.908046 | 1058 |
| CENPA | VX-11e       | 0.119907 | 0.003494 | 1058 |
| CENPA | VX-680       | -0.01644 | 0.894027 | 1058 |
| CENPA | VX-702       | -0.00418 | 0.991734 | 1058 |
| CENPA | Veliparib    | 0.003789 | 0.968997 | 1058 |
| CENPA | Vinblastine  | -0.02748 | 0.572421 | 1058 |
| CENPA | Vinorelbine  | 0.001523 | 0.984367 | 1058 |
| CENPA | Vorinostat   | -0.11505 | 0.001568 | 1058 |
| CENPA | WH-4-023     | 0.069751 | 0.369441 | 1058 |
| CENPA | WZ-1-84      | 0.013065 | 0.8898   | 1058 |
| CENPA | WZ3105       | -0.05069 | 0.168707 | 1058 |
| CENPA | XAV939       | 0.045337 | 0.258213 | 1058 |
| CENPA | XL-184       | 0.030661 | 0.539179 | 1058 |
| CENPA | XMD11-85h    | 0.063732 | 0.692408 | 1058 |
| CENPA | XMD13-2      | -0.00149 | 0.972957 | 1058 |
| CENPA | XMD14-99     | 0.049565 | 0.205124 | 1058 |
| CENPA | XMD15-27     | 0.012066 | 0.833801 | 1058 |
| CENPA | XMD8-85      | 0.051907 | 0.547269 | 1058 |
| CENPA | XMD8-92      | 0.050013 | 0.653138 | 1058 |
| CENPA | Y-39983      | -0.02074 | 0.618963 | 1058 |
| CENPA | YK 4-279     | 0.059456 | 0.245767 | 1058 |
| CENPA | YM155        | -0.0448  | 0.389204 | 1058 |
| CENPA | YM201636     | -0.04599 | 0.228448 | 1058 |

|       |                    |          |          |      |
|-------|--------------------|----------|----------|------|
| CENPA | Z-LLN1e-CHO        | 0.050568 | 0.52341  | 1058 |
| CENPA | ZG-10              | -0.02872 | 0.708491 | 1058 |
| CENPA | ZM-447439          | -0.02513 | 0.630029 | 1058 |
| CENPA | ZSTK474            | -0.03624 | 0.344782 | 1058 |
| CENPA | Zibotentan         | 0.011013 | 0.983594 | 1058 |
| CENPA | piperlongumine     | 0.048835 | 0.266344 | 1058 |
| CENPA | rTRAIL             | 0.044061 | 0.547632 | 1058 |
| CENPA | selumetinib        | 0.194228 | 1.68E-08 | 1058 |
| CENPE | (5Z)-7-Oxozeaenol  | 0.146534 | 7.21E-05 | 1062 |
| CENPE | 17-AAG             | 0.150109 | 3.55E-05 | 1062 |
| CENPE | 5-Fluorouracil     | -0.06222 | 0.093428 | 1062 |
| CENPE | 681640             | 0.00123  | 0.987848 | 1062 |
| CENPE | A-443654           | -0.04966 | 0.783548 | 1062 |
| CENPE | A-770041           | 0.001622 | 0.989113 | 1062 |
| CENPE | AC220              | -0.04786 | 0.312485 | 1062 |
| CENPE | AG-014699          | 0.017115 | 0.724015 | 1062 |
| CENPE | AICAR              | -0.13592 | 0.000347 | 1062 |
| CENPE | AKT inhibitor VIII | 0.057953 | 0.195173 | 1062 |
| CENPE | AMG-706            | 0.02083  | 0.772192 | 1062 |
| CENPE | AP-24534           | -0.06969 | 0.086712 | 1062 |
| CENPE | AR-42              | -0.13365 | 0.000147 | 1062 |
| CENPE | AS601245           | 0.06383  | 0.21063  | 1062 |
| CENPE | AS605240           | 0.0087   | 0.870056 | 1062 |
| CENPE | AT-7519            | -0.17003 | 9.17E-07 | 1062 |
| CENPE | ATRA               | -0.04951 | 0.31364  | 1062 |
| CENPE | AUY922             | 0.024712 | 0.678043 | 1062 |
| CENPE | AZ628              | 0.163566 | 0.0108   | 1062 |
| CENPE | AZD6482            | 0.01444  | 0.80641  | 1062 |
| CENPE | AZD7762            | -0.16996 | 5.78E-06 | 1062 |
| CENPE | AZD8055            | -0.1062  | 0.005808 | 1062 |
| CENPE | Afatinib           | 0.130072 | 0.000248 | 1062 |
| CENPE | Axitinib           | -0.07688 | 0.106375 | 1062 |
| CENPE | BAY 61-3606        | -0.03571 | 0.410029 | 1062 |
| CENPE | BEZ235             | -0.00829 | 0.894126 | 1062 |
| CENPE | BHG712             | -0.06519 | 0.076236 | 1062 |
| CENPE | BI-2536            | -0.13916 | 0.111729 | 1062 |
| CENPE | BIRB 0796          | 0.039565 | 0.457073 | 1062 |
| CENPE | BIX02189           | -0.11868 | 0.00088  | 1062 |
| CENPE | BMS-509744         | -0.00104 | 0.993524 | 1062 |
| CENPE | BMS-536924         | -0.01051 | 0.914458 | 1062 |
| CENPE | BMS-708163         | 0.066831 | 0.093625 | 1062 |
| CENPE | BMS-754807         | 0.047043 | 0.387876 | 1062 |
| CENPE | BMS345541          | -0.16381 | 2.48E-06 | 1062 |
| CENPE | BX-795             | -0.13094 | 0.001146 | 1062 |
| CENPE | BX-912             | -0.2045  | 2.11E-09 | 1062 |
| CENPE | Belinostat         | -0.10405 | 0.004477 | 1062 |
| CENPE | Bexarotene         | -0.0243  | 0.778438 | 1062 |
| CENPE | Bicalutamide       | -0.0079  | 0.888615 | 1062 |
| CENPE | Bleomycin          | 0.068891 | 0.175731 | 1062 |
| CENPE | Bleomycin (50 uM)  | 0.076119 | 0.036311 | 1062 |

|       |               |          |          |      |
|-------|---------------|----------|----------|------|
| CENPE | Bortezomib    | 0.013443 | 0.899067 | 1062 |
| CENPE | Bosutinib     | -0.03077 | 0.598907 | 1062 |
| CENPE | Bryostatins 1 | 0.073273 | 0.127289 | 1062 |
| CENPE | CAL-101       | -0.10464 | 0.004261 | 1062 |
| CENPE | CAY10603      | -0.14277 | 4.59E-05 | 1062 |
| CENPE | CCT007093     | 0.077921 | 0.061136 | 1062 |
| CENPE | CCT018159     | -0.03813 | 0.473595 | 1062 |
| CENPE | CEP-701       | -0.08757 | 0.027118 | 1062 |
| CENPE | CGP-082996    | 0.005467 | 0.967659 | 1062 |
| CENPE | CGP-60474     | -0.04315 | 0.646054 | 1062 |
| CENPE | CH5424802     | -0.05496 | 0.314558 | 1062 |
| CENPE | CHIR-99021    | 0.029785 | 0.467653 | 1062 |
| CENPE | CI-1040       | 0.139312 | 0.000384 | 1062 |
| CENPE | CMK           | -0.01319 | 0.930506 | 1062 |
| CENPE | CP466722      | -0.1825  | 1.23E-07 | 1062 |
| CENPE | CP724714      | 0.063797 | 0.200672 | 1062 |
| CENPE | CUDC-101      | -0.12097 | 0.000776 | 1062 |
| CENPE | CX-5461       | -0.14186 | 6.32E-05 | 1062 |
| CENPE | Camptothecin  | -0.1059  | 0.008635 | 1062 |
| CENPE | Cetuximab     | 0.089941 | 0.022666 | 1062 |
| CENPE | Cisplatin     | -0.01269 | 0.835752 | 1062 |
| CENPE | Crizotinib    | -0.07841 | 0.528386 | 1062 |
| CENPE | Cyclopamine   | -0.04138 | 0.729336 | 1062 |
| CENPE | Cytarabine    | -0.04956 | 0.325848 | 1062 |
| CENPE | DMOG          | -0.08411 | 0.045591 | 1062 |
| CENPE | Dabrafenib    | 0.140272 | 0.00026  | 1062 |
| CENPE | Dasatinib     | 0.055495 | 0.425905 | 1062 |
| CENPE | Docetaxel     | 0.057968 | 0.129605 | 1062 |
| CENPE | Doxorubicin   | 0.001071 | 0.990515 | 1062 |
| CENPE | EHT 1864      | 0.031685 | 0.661076 | 1062 |
| CENPE | EKB-569       | -0.04163 | 0.319936 | 1062 |
| CENPE | EX-527        | 0.033141 | 0.769628 | 1062 |
| CENPE | Elesclomol    | -0.06254 | 0.153126 | 1062 |
| CENPE | Embelin       | 0.012517 | 0.8741   | 1062 |
| CENPE | Epothilone B  | 0.023409 | 0.682051 | 1062 |
| CENPE | Erlotinib     | 0.151503 | 0.023812 | 1062 |
| CENPE | Etoposide     | -0.11069 | 0.008154 | 1062 |
| CENPE | FH535         | 0.103535 | 0.014978 | 1062 |
| CENPE | FK866         | -0.17831 | 3.32E-07 | 1062 |
| CENPE | FMK           | -0.0043  | 0.962722 | 1062 |
| CENPE | FR-180204     | 0.009805 | 0.887294 | 1062 |
| CENPE | FTI-277       | 0.106338 | 0.007328 | 1062 |
| CENPE | Foretinib     | -0.11908 | 0.001555 | 1062 |
| CENPE | GDC0449       | -0.0009  | 0.995569 | 1062 |
| CENPE | GDC0941       | -0.06703 | 0.184332 | 1062 |
| CENPE | GNF-2         | -0.03077 | 0.913374 | 1062 |
| CENPE | GSK-650394    | -0.01122 | 0.913039 | 1062 |
| CENPE | GSK1070916    | -0.18657 | 9.85E-08 | 1062 |
| CENPE | GSK1904529A   | 0.044023 | 0.346063 | 1062 |
| CENPE | GSK2126458    | -0.09941 | 0.006734 | 1062 |



|       |                    |          |          |      |
|-------|--------------------|----------|----------|------|
| CENPE | GSK269962A         | -0.00824 | 0.902493 | 1062 |
| CENPE | GSK429286A         | -0.12117 | 0.001371 | 1062 |
| CENPE | GSK690693          | -0.15346 | 1.39E-05 | 1062 |
| CENPE | GW 441756          | -0.00493 | 0.992585 | 1062 |
| CENPE | GW-2580            | 0.015347 | 0.984347 | 1062 |
| CENPE | GW843682X          | -0.15954 | 0.030156 | 1062 |
| CENPE | Gefitinib          | 0.121892 | 0.001827 | 1062 |
| CENPE | Gemcitabine        | -0.06678 | 0.154314 | 1062 |
| CENPE | Genentech Cpd 10   | -0.16538 | 2.37E-06 | 1062 |
| CENPE | HG-5-113-01        | -0.08802 | 0.181451 | 1062 |
| CENPE | HG-5-88-01         | -0.01431 | 0.945218 | 1062 |
| CENPE | HG-6-64-1          | 0.019363 | 0.730489 | 1062 |
| CENPE | I-BET-762          | -0.16893 | 8.05E-07 | 1062 |
| CENPE | IOX2               | -0.0123  | 0.868582 | 1062 |
| CENPE | IPA-3              | -0.10128 | 0.008058 | 1062 |
| CENPE | Imatinib           | -0.05357 | 0.73953  | 1062 |
| CENPE | Ispinesib Mesylate | -0.13822 | 9.4E-05  | 1062 |
| CENPE | JNJ-26854165       | -0.01024 | 0.876502 | 1062 |
| CENPE | JNK Inhibitor VIII | 0.048646 | 0.262143 | 1062 |
| CENPE | JNK-9L             | 0.048961 | 0.377098 | 1062 |
| CENPE | JQ1                | -0.00416 | 0.943407 | 1062 |
| CENPE | JQ12               | -0.00773 | 0.91071  | 1062 |
| CENPE | JW-7-24-1          | -0.15868 | 4.98E-06 | 1062 |
| CENPE | JW-7-52-1          | -0.01009 | 0.940319 | 1062 |
| CENPE | KIN001-055         | 0.01019  | 0.911045 | 1062 |
| CENPE | KIN001-102         | -0.16455 | 1.95E-06 | 1062 |
| CENPE | KIN001-135         | 0.082593 | 0.38789  | 1062 |
| CENPE | KIN001-236         | -0.09093 | 0.012905 | 1062 |
| CENPE | KIN001-244         | -0.11912 | 0.000894 | 1062 |
| CENPE | KIN001-260         | -0.11306 | 0.001526 | 1062 |
| CENPE | KIN001-266         | -0.03289 | 0.515905 | 1062 |
| CENPE | KIN001-270         | -0.16804 | 4.19E-06 | 1062 |
| CENPE | KU-55933           | -0.0761  | 0.147262 | 1062 |
| CENPE | LAQ824             | -0.06366 | 0.110206 | 1062 |
| CENPE | LFM-A13            | 0.015287 | 0.801981 | 1062 |
| CENPE | LY317615           | -0.06128 | 0.153131 | 1062 |
| CENPE | Lapatinib          | 0.173762 | 0.003351 | 1062 |
| CENPE | Lenalidomide       | -0.04404 | 0.550657 | 1062 |
| CENPE | Linifanib          | -0.01516 | 0.814155 | 1062 |
| CENPE | Lisitinib          | 0.042871 | 0.509132 | 1062 |
| CENPE | MG-132             | 0.021005 | 0.856472 | 1062 |
| CENPE | MK-2206            | -0.10244 | 0.026924 | 1062 |
| CENPE | MLN4924            | 0.037146 | 0.534706 | 1062 |
| CENPE | MP470              | -0.07421 | 0.078418 | 1062 |
| CENPE | MPS-1-IN-1         | -0.07759 | 0.038491 | 1062 |
| CENPE | MS-275             | -0.14314 | 0.042763 | 1062 |
| CENPE | Masitinib          | -0.09662 | 0.008664 | 1062 |
| CENPE | Methotrexate       | -0.1549  | 1.76E-05 | 1062 |
| CENPE | Midostaurin        | -0.00139 | 0.979498 | 1062 |
| CENPE | Mitomycin C        | -0.02646 | 0.645431 | 1062 |

|       |                     |          |          |      |
|-------|---------------------|----------|----------|------|
| CENPE | NG-25               | -0.13032 | 0.00021  | 1062 |
| CENPE | NPK76-II-72-1       | -0.22073 | 6.62E-11 | 1062 |
| CENPE | NSC-207895          | -0.11536 | 0.003919 | 1062 |
| CENPE | NSC-87877           | 0.094074 | 0.0644   | 1062 |
| CENPE | NU-7441             | -0.02888 | 0.721804 | 1062 |
| CENPE | Navitoclax          | -0.18235 | 3.77E-07 | 1062 |
| CENPE | Nilotinib           | -0.09037 | 0.046915 | 1062 |
| CENPE | Nutlin-3a (-)       | 0.079227 | 0.073641 | 1062 |
| CENPE | OSI-027             | -0.13823 | 9.01E-05 | 1062 |
| CENPE | OSI-930             | -0.06257 | 0.107618 | 1062 |
| CENPE | OSU-03012           | -0.01535 | 0.795285 | 1062 |
| CENPE | Obatoclax Mesylate  | 0.031512 | 0.534111 | 1062 |
| CENPE | Olaparib            | -0.0045  | 0.934709 | 1062 |
| CENPE | PAC-1               | -0.08057 | 0.047895 | 1062 |
| CENPE | PD-0325901          | 0.199683 | 6.83E-08 | 1062 |
| CENPE | PD-0332991          | 0.015408 | 0.82358  | 1062 |
| CENPE | PD-173074           | -0.032   | 0.843473 | 1062 |
| CENPE | PF-4708671          | 0.038895 | 0.705557 | 1062 |
| CENPE | PF-562271           | 0.013168 | 0.848085 | 1062 |
| CENPE | PFI-1               | 0.004945 | 0.937761 | 1062 |
| CENPE | PHA-665752          | 0.041687 | 0.791756 | 1062 |
| CENPE | PHA-793887          | -0.15831 | 4.28E-06 | 1062 |
| CENPE | PI-103              | -0.14849 | 2.42E-05 | 1062 |
| CENPE | PIK-93              | -0.17842 | 2.02E-07 | 1062 |
| CENPE | PLX4720             | 0.168407 | 3.11E-06 | 1062 |
| CENPE | Paclitaxel          | -0.04583 | 0.699591 | 1062 |
| CENPE | Parthenolide        | -0.05877 | 0.57397  | 1062 |
| CENPE | Pazopanib           | 0.019052 | 0.76615  | 1062 |
| CENPE | Phenformin          | -0.0713  | 0.055861 | 1062 |
| CENPE | Pyrimethamine       | -0.04517 | 0.709125 | 1062 |
| CENPE | QL-VIII-58          | -0.02867 | 0.750536 | 1062 |
| CENPE | QL-X-138            | -0.16713 | 2.02E-06 | 1062 |
| CENPE | QL-XI-92            | -0.15751 | 6.81E-06 | 1062 |
| CENPE | QL-XII-47           | -0.11521 | 0.002272 | 1062 |
| CENPE | QL-XII-61           | -0.10093 | 0.09755  | 1062 |
| CENPE | QS11                | -0.06528 | 0.252289 | 1062 |
| CENPE | RDEA119             | 0.241711 | 1.01E-12 | 1062 |
| CENPE | RO-3306             | 0.031339 | 0.480524 | 1062 |
| CENPE | Rapamycin           | -0.04755 | 0.70686  | 1062 |
| CENPE | Roscovitine         | 0.036203 | 0.856106 | 1062 |
| CENPE | Ruxolitinib         | -0.0739  | 0.107838 | 1062 |
| CENPE | S-Trytyl-L-cysteine | -0.09497 | 0.21361  | 1062 |
| CENPE | SB 216763           | 0.043987 | 0.385282 | 1062 |
| CENPE | SB 505124           | 0.039922 | 0.598579 | 1062 |
| CENPE | SB52334             | 0.026071 | 0.626065 | 1062 |
| CENPE | SB590885            | 0.189311 | 1.36E-06 | 1062 |
| CENPE | SGC0946             | 0.017513 | 0.78512  | 1062 |
| CENPE | SL 0101-1           | 0.042981 | 0.577088 | 1062 |
| CENPE | SN-38               | -0.03887 | 0.400769 | 1062 |
| CENPE | SNX-2112            | -0.13625 | 0.000118 | 1062 |

|       |              |          |          |      |
|-------|--------------|----------|----------|------|
| CENPE | STF-62247    | -0.0812  | 0.038732 | 1062 |
| CENPE | Salubrinal   | -0.07626 | 0.356909 | 1062 |
| CENPE | Saracatinib  | -0.01858 | 0.851215 | 1062 |
| CENPE | Shikonin     | -0.04608 | 0.388943 | 1062 |
| CENPE | Sorafenib    | 0.001538 | 0.992965 | 1062 |
| CENPE | Sunitinib    | -0.06985 | 0.351701 | 1062 |
| CENPE | T0901317     | -0.09807 | 0.011604 | 1062 |
| CENPE | TAE684       | -0.03013 | 0.824646 | 1062 |
| CENPE | TAK-715      | -0.12638 | 0.000361 | 1062 |
| CENPE | TG101348     | -0.17256 | 6.03E-07 | 1062 |
| CENPE | TGX221       | 0.120956 | 0.051268 | 1062 |
| CENPE | THZ-2-102-1  | -0.15223 | 1.51E-05 | 1062 |
| CENPE | THZ-2-49     | -0.07351 | 0.047055 | 1062 |
| CENPE | TL-1-85      | -0.12332 | 0.00049  | 1062 |
| CENPE | TL-2-105     | -0.12858 | 0.00035  | 1062 |
| CENPE | TPCA-1       | -0.17102 | 6.68E-07 | 1062 |
| CENPE | TW 37        | -0.06297 | 0.153217 | 1062 |
| CENPE | Talazoparib  | -0.03953 | 0.397448 | 1062 |
| CENPE | Tamoxifen    | -0.02107 | 0.882152 | 1062 |
| CENPE | Temozolomide | -0.02772 | 0.724117 | 1062 |
| CENPE | Temsirolimus | -0.08826 | 0.04473  | 1062 |
| CENPE | Thapsigargin | 0.006222 | 0.946892 | 1062 |
| CENPE | Tipifarnib   | 0.021323 | 0.786107 | 1062 |
| CENPE | Tivozanib    | -0.05882 | 0.270544 | 1062 |
| CENPE | Trametinib   | 0.270673 | 0        | 1062 |
| CENPE | Tubastatin A | -0.12429 | 0.000411 | 1062 |
| CENPE | UNC0638      | -0.09208 | 0.008753 | 1062 |
| CENPE | UNC1215      | 0.052707 | 0.287928 | 1062 |
| CENPE | VNLG/124     | -0.06937 | 0.085404 | 1062 |
| CENPE | VX-11e       | 0.111437 | 0.007181 | 1062 |
| CENPE | VX-680       | -0.10801 | 0.19583  | 1062 |
| CENPE | VX-702       | -0.03352 | 0.890442 | 1062 |
| CENPE | Veliparib    | 0.013187 | 0.87665  | 1062 |
| CENPE | Vinblastine  | -0.10025 | 0.014567 | 1062 |
| CENPE | Vinorelbine  | -0.0725  | 0.14662  | 1062 |
| CENPE | Vorinostat   | -0.18569 | 2.03E-07 | 1062 |
| CENPE | WH-4-023     | 0.036635 | 0.671712 | 1062 |
| CENPE | WZ-1-84      | 0.061515 | 0.440274 | 1062 |
| CENPE | WZ3105       | -0.13722 | 8.44E-05 | 1062 |
| CENPE | XAV939       | 0.019516 | 0.650832 | 1062 |
| CENPE | XL-184       | -0.06659 | 0.134655 | 1062 |
| CENPE | XMD11-85h    | 0.044622 | 0.8045   | 1062 |
| CENPE | XMD13-2      | -0.13246 | 0.000165 | 1062 |
| CENPE | XMD14-99     | -0.06383 | 0.094726 | 1062 |
| CENPE | XMD15-27     | -0.07276 | 0.09905  | 1062 |
| CENPE | XMD8-85      | -0.00435 | 0.968163 | 1062 |
| CENPE | XMD8-92      | -0.00779 | 0.961679 | 1062 |
| CENPE | Y-39983      | -0.16913 | 1.76E-06 | 1062 |
| CENPE | YK 4-279     | 0.016831 | 0.798576 | 1062 |
| CENPE | YM155        | -0.07844 | 0.090616 | 1062 |

|       |                    |          |          |      |
|-------|--------------------|----------|----------|------|
| CENPE | YM201636           | -0.13881 | 9.14E-05 | 1062 |
| CENPE | Z-LLN1e-CHO        | 0.005357 | 0.95478  | 1062 |
| CENPE | ZG-10              | -0.13074 | 0.025296 | 1062 |
| CENPE | ZM-447439          | -0.09573 | 0.024251 | 1062 |
| CENPE | ZSTK474            | -0.14013 | 7.22E-05 | 1062 |
| CENPE | Zibotentan         | -0.00673 | 0.989444 | 1062 |
| CENPE | piperlongumine     | 0.006268 | 0.910961 | 1062 |
| CENPE | rTRAIL             | 0.034161 | 0.658458 | 1062 |
| CENPE | selumetinib        | 0.270364 | 0        | 1062 |
| CENPF | (5Z)-7-oxozeaenol  | 0.132361 | 0.000382 | 1063 |
| CENPF | 17-AAG             | 0.177926 | 7.81E-07 | 1063 |
| CENPF | 5-Fluorouracil     | 0.007012 | 0.865844 | 1063 |
| CENPF | 681640             | 0.029559 | 0.64725  | 1063 |
| CENPF | A-443654           | -0.0363  | 0.860921 | 1063 |
| CENPF | A-770041           | 0.01783  | 0.862662 | 1063 |
| CENPF | AC220              | -0.02916 | 0.578286 | 1063 |
| CENPF | AG-014699          | -0.00796 | 0.875865 | 1063 |
| CENPF | AICAR              | -0.03135 | 0.462918 | 1063 |
| CENPF | AKT inhibitor VIII | 0.053158 | 0.240144 | 1063 |
| CENPF | AMG-706            | 0.014963 | 0.84104  | 1063 |
| CENPF | AP-24534           | -0.00923 | 0.855112 | 1063 |
| CENPF | AR-42              | -0.09844 | 0.005806 | 1063 |
| CENPF | AS601245           | 0.09609  | 0.038167 | 1063 |
| CENPF | AS605240           | 0.020026 | 0.683332 | 1063 |
| CENPF | AT-7519            | -0.06723 | 0.063818 | 1063 |
| CENPF | ATRA               | -0.00715 | 0.910038 | 1063 |
| CENPF | AUY922             | 0.092642 | 0.041595 | 1063 |
| CENPF | AZ628              | 0.135994 | 0.040617 | 1063 |
| CENPF | AZD6482            | 0.042147 | 0.375882 | 1063 |
| CENPF | AZD7762            | -0.07476 | 0.061557 | 1063 |
| CENPF | AZD8055            | -0.00872 | 0.849953 | 1063 |
| CENPF | Afatinib           | 0.092598 | 0.010913 | 1063 |
| CENPF | Axitinib           | -0.05121 | 0.321185 | 1063 |
| CENPF | BAY 61-3606        | 0.006897 | 0.890478 | 1063 |
| CENPF | BEZ235             | 0.080734 | 0.07168  | 1063 |
| CENPF | BHG712             | -0.01279 | 0.752229 | 1063 |
| CENPF | BI-2536            | -0.04958 | 0.655295 | 1063 |
| CENPF | BIRB 0796          | 0.029431 | 0.595693 | 1063 |
| CENPF | BIX02189           | -0.05989 | 0.108387 | 1063 |
| CENPF | BMS-509744         | -0.01288 | 0.911052 | 1063 |
| CENPF | BMS-536924         | -0.01698 | 0.844701 | 1063 |
| CENPF | BMS-708163         | 0.068147 | 0.086816 | 1063 |
| CENPF | BMS-754807         | 0.028412 | 0.633002 | 1063 |
| CENPF | BMS345541          | -0.08679 | 0.015715 | 1063 |
| CENPF | BX-795             | -0.06348 | 0.15245  | 1063 |
| CENPF | BX-912             | -0.1455  | 2.82E-05 | 1063 |
| CENPF | Belinostat         | -0.06864 | 0.06735  | 1063 |
| CENPF | Bexarotene         | 0.022936 | 0.793061 | 1063 |
| CENPF | Bicalutamide       | -0.01581 | 0.762443 | 1063 |
| CENPF | Bleomycin          | 0.09297  | 0.051867 | 1063 |

|       |                   |          |          |      |
|-------|-------------------|----------|----------|------|
| CENPF | Bleomycin (50 uM) | 0.100018 | 0.005291 | 1063 |
| CENPF | Bortezomib        | 0.043878 | 0.614589 | 1063 |
| CENPF | Bosutinib         | 0.014209 | 0.831049 | 1063 |
| CENPF | Bryostatins 1     | 0.076704 | 0.108527 | 1063 |
| CENPF | CAL-101           | -0.05335 | 0.166989 | 1063 |
| CENPF | CAY10603          | -0.09352 | 0.00885  | 1063 |
| CENPF | CCT007093         | 0.06928  | 0.100906 | 1063 |
| CENPF | CCT018159         | 0.039752 | 0.451096 | 1063 |
| CENPF | CEP-701           | -0.02614 | 0.55789  | 1063 |
| CENPF | CGP-082996        | 0.010502 | 0.935932 | 1063 |
| CENPF | CGP-60474         | 0.024306 | 0.815661 | 1063 |
| CENPF | CH5424802         | -0.03814 | 0.531845 | 1063 |
| CENPF | CHIR-99021        | -0.01607 | 0.711208 | 1063 |
| CENPF | CI-1040           | 0.150924 | 0.000107 | 1063 |
| CENPF | CMK               | 0.042973 | 0.735279 | 1063 |
| CENPF | CP466722          | -0.11347 | 0.001325 | 1063 |
| CENPF | CP724714          | 0.037393 | 0.505614 | 1063 |
| CENPF | CUDC-101          | -0.08131 | 0.026875 | 1063 |
| CENPF | CX-5461           | -0.10933 | 0.002378 | 1063 |
| CENPF | Camptothecin      | -0.05272 | 0.234298 | 1063 |
| CENPF | Cetuximab         | 0.03133  | 0.470551 | 1063 |
| CENPF | Cisplatin         | -0.03419 | 0.511741 | 1063 |
| CENPF | Crizotinib        | -0.02873 | 0.869641 | 1063 |
| CENPF | Cyclopamine       | -0.00306 | 0.983342 | 1063 |
| CENPF | Cytarabine        | -0.0227  | 0.693842 | 1063 |
| CENPF | DMOG              | -0.03561 | 0.459509 | 1063 |
| CENPF | Dabrafenib        | 0.126463 | 0.001127 | 1063 |
| CENPF | Dasatinib         | 0.060916 | 0.37756  | 1063 |
| CENPF | Docetaxel         | 0.092678 | 0.01307  | 1063 |
| CENPF | Doxorubicin       | 0.036523 | 0.584888 | 1063 |
| CENPF | EHT 1864          | 0.018438 | 0.824216 | 1063 |
| CENPF | EKB-569           | -0.00797 | 0.868746 | 1063 |
| CENPF | EX-527            | 0.01845  | 0.883471 | 1063 |
| CENPF | Elesclomol        | -0.0478  | 0.292135 | 1063 |
| CENPF | Embelin           | 0.039591 | 0.515235 | 1063 |
| CENPF | Epothilone B      | 0.072919 | 0.129473 | 1063 |
| CENPF | Erlotinib         | 0.084429 | 0.245947 | 1063 |
| CENPF | Etoposide         | -0.07021 | 0.114947 | 1063 |
| CENPF | FH535             | 0.099121 | 0.020321 | 1063 |
| CENPF | FK866             | -0.12331 | 0.000527 | 1063 |
| CENPF | FMK               | 0.009244 | 0.917655 | 1063 |
| CENPF | FR-180204         | -0.00899 | 0.897056 | 1063 |
| CENPF | FTI-277           | 0.126296 | 0.001279 | 1063 |
| CENPF | Foretinib         | -0.07594 | 0.056092 | 1063 |
| CENPF | GDC0449           | 0.02629  | 0.820792 | 1063 |
| CENPF | GDC0941           | -0.02771 | 0.660991 | 1063 |
| CENPF | GNF-2             | -0.0018  | 0.996256 | 1063 |
| CENPF | GSK-650394        | 0.030504 | 0.703137 | 1063 |
| CENPF | GSK1070916        | -0.16266 | 4.1E-06  | 1063 |
| CENPF | GSK1904529A       | 0.011019 | 0.842731 | 1063 |

|       |                    |          |          |      |
|-------|--------------------|----------|----------|------|
| CENPF | GSK2126458         | -0.05879 | 0.12307  | 1063 |
| CENPF | GSK269962A         | 0.029727 | 0.602499 | 1063 |
| CENPF | GSK429286A         | -0.11628 | 0.002228 | 1063 |
| CENPF | GSK690693          | -0.11997 | 0.000817 | 1063 |
| CENPF | GW 441756          | -0.05321 | 0.73804  | 1063 |
| CENPF | GW-2580            | 0.008005 | 0.994893 | 1063 |
| CENPF | GW843682X          | -0.05399 | 0.560667 | 1063 |
| CENPF | Gefitinib          | 0.094002 | 0.018845 | 1063 |
| CENPF | Gemcitabine        | -0.01259 | 0.832272 | 1063 |
| CENPF | Genentech Cpd 10   | -0.14875 | 2.46E-05 | 1063 |
| CENPF | HG-5-113-01        | -0.09772 | 0.132288 | 1063 |
| CENPF | HG-5-88-01         | -0.00419 | 0.987441 | 1063 |
| CENPF | HG-6-64-1          | 0.059382 | 0.200644 | 1063 |
| CENPF | I-BET-762          | -0.08593 | 0.014629 | 1063 |
| CENPF | IOX2               | -0.01793 | 0.798944 | 1063 |
| CENPF | IPA-3              | -0.03678 | 0.376754 | 1063 |
| CENPF | Imatinib           | -0.02009 | 0.916249 | 1063 |
| CENPF | Ispinesib Mesylate | -0.04068 | 0.289934 | 1063 |
| CENPF | JNJ-26854165       | 0.034323 | 0.525778 | 1063 |
| CENPF | JNK Inhibitor VIII | 0.016476 | 0.730683 | 1063 |
| CENPF | JNK-9L             | 0.067214 | 0.193363 | 1063 |
| CENPF | JQ1                | 0.041171 | 0.34899  | 1063 |
| CENPF | JQ12               | 0.009093 | 0.895379 | 1063 |
| CENPF | JW-7-24-1          | -0.10001 | 0.004872 | 1063 |
| CENPF | JW-7-52-1          | 0.052749 | 0.615501 | 1063 |
| CENPF | KIN001-055         | 0.011526 | 0.897951 | 1063 |
| CENPF | KIN001-102         | -0.10141 | 0.004078 | 1063 |
| CENPF | KIN001-135         | -0.01301 | 0.926698 | 1063 |
| CENPF | KIN001-236         | -0.0367  | 0.347408 | 1063 |
| CENPF | KIN001-244         | -0.07004 | 0.05866  | 1063 |
| CENPF | KIN001-260         | -0.04041 | 0.288741 | 1063 |
| CENPF | KIN001-266         | -0.02349 | 0.656524 | 1063 |
| CENPF | KIN001-270         | -0.11609 | 0.001896 | 1063 |
| CENPF | KU-55933           | -0.01085 | 0.895778 | 1063 |
| CENPF | LAQ824             | -0.04422 | 0.282546 | 1063 |
| CENPF | LFM-A13            | 0.007065 | 0.914292 | 1063 |
| CENPF | LY317615           | -0.02806 | 0.554476 | 1063 |
| CENPF | Lapatinib          | 0.135084 | 0.026356 | 1063 |
| CENPF | Lenalidomide       | 0.000979 | 0.993173 | 1063 |
| CENPF | Linifanib          | 0.00764  | 0.912587 | 1063 |
| CENPF | Lisitinib          | 0.019109 | 0.80551  | 1063 |
| CENPF | MG-132             | 0.043856 | 0.651814 | 1063 |
| CENPF | MK-2206            | -0.04879 | 0.34326  | 1063 |
| CENPF | MLN4924            | 0.073558 | 0.168035 | 1063 |
| CENPF | MP470              | -0.07241 | 0.086486 | 1063 |
| CENPF | MPS-1-IN-1         | -0.05715 | 0.136408 | 1063 |
| CENPF | MS-275             | -0.10938 | 0.13977  | 1063 |
| CENPF | Masitinib          | -0.02648 | 0.518099 | 1063 |
| CENPF | Methotrexate       | -0.05323 | 0.164008 | 1063 |
| CENPF | Midostaurin        | 0.016657 | 0.745886 | 1063 |

|       |                     |          |          |      |
|-------|---------------------|----------|----------|------|
| CENPF | Mitomycin C         | 0.003113 | 0.965361 | 1063 |
| CENPF | NG-25               | -0.06184 | 0.092215 | 1063 |
| CENPF | NPK76-II-72-1       | -0.1577  | 4.51E-06 | 1063 |
| CENPF | NSC-207895          | -0.13967 | 0.000395 | 1063 |
| CENPF | NSC-87877           | 0.087434 | 0.087543 | 1063 |
| CENPF | NU-7441             | 0.019468 | 0.831806 | 1063 |
| CENPF | Navitoclax          | -0.20227 | 1.47E-08 | 1063 |
| CENPF | Nilotinib           | -0.02268 | 0.701146 | 1063 |
| CENPF | Nutlin-3a (-)       | 0.057067 | 0.222796 | 1063 |
| CENPF | OSI-027             | -0.07729 | 0.033267 | 1063 |
| CENPF | OSI-930             | 0.010598 | 0.815523 | 1063 |
| CENPF | OSU-03012           | 0.058624 | 0.219919 | 1063 |
| CENPF | Obatoclax Mesylate  | 0.076789 | 0.083018 | 1063 |
| CENPF | Olaparib            | -0.02739 | 0.561847 | 1063 |
| CENPF | PAC-1               | -0.03705 | 0.406613 | 1063 |
| CENPF | PD-0325901          | 0.186238 | 5.39E-07 | 1063 |
| CENPF | PD-0332991          | 0.046881 | 0.397619 | 1063 |
| CENPF | PD-173074           | -0.00214 | 0.994718 | 1063 |
| CENPF | PF-4708671          | 0.04651  | 0.618729 | 1063 |
| CENPF | PF-562271           | 0.011551 | 0.867308 | 1063 |
| CENPF | PFI-1               | 0.072288 | 0.107991 | 1063 |
| CENPF | PHA-665752          | 0.033904 | 0.833639 | 1063 |
| CENPF | PHA-793887          | -0.06404 | 0.07411  | 1063 |
| CENPF | PI-103              | -0.08237 | 0.022969 | 1063 |
| CENPF | PIK-93              | -0.11132 | 0.001507 | 1063 |
| CENPF | PLX4720             | 0.124625 | 0.000885 | 1063 |
| CENPF | Paclitaxel          | 0.036866 | 0.767636 | 1063 |
| CENPF | Parthenolide        | -0.02101 | 0.86883  | 1063 |
| CENPF | Pazopanib           | 0.004755 | 0.949838 | 1063 |
| CENPF | Phenformin          | 0.000672 | 0.988825 | 1063 |
| CENPF | Pyrimethamine       | 0.015769 | 0.912183 | 1063 |
| CENPF | QL-VIII-58          | 0.027994 | 0.75747  | 1063 |
| CENPF | QL-X-138            | -0.11477 | 0.001407 | 1063 |
| CENPF | QL-XI-92            | -0.10725 | 0.002649 | 1063 |
| CENPF | QL-XII-47           | -0.06625 | 0.093395 | 1063 |
| CENPF | QL-XII-61           | -0.08262 | 0.190501 | 1063 |
| CENPF | QS11                | -0.03562 | 0.585056 | 1063 |
| CENPF | RDEA119             | 0.224075 | 4.77E-11 | 1063 |
| CENPF | RO-3306             | 0.034954 | 0.42612  | 1063 |
| CENPF | Rapamycin           | 0.007465 | 0.969094 | 1063 |
| CENPF | Roscovitine         | 0.063696 | 0.692948 | 1063 |
| CENPF | Ruxolitinib         | -0.0424  | 0.410694 | 1063 |
| CENPF | S-Trityl-L-cysteine | 0.000343 | 0.997858 | 1063 |
| CENPF | SB 216763           | 0.03454  | 0.50856  | 1063 |
| CENPF | SB 505124           | 0.05864  | 0.39312  | 1063 |
| CENPF | SB52334             | -0.02814 | 0.593278 | 1063 |
| CENPF | SB590885            | 0.16902  | 2.44E-05 | 1063 |
| CENPF | SGC0946             | -0.0098  | 0.887459 | 1063 |
| CENPF | SL 0101-1           | 0.035764 | 0.651423 | 1063 |
| CENPF | SN-38               | 0.010285 | 0.851921 | 1063 |

|       |              |          |          |      |
|-------|--------------|----------|----------|------|
| CENPF | SNX-2112     | -0.0247  | 0.533139 | 1063 |
| CENPF | STF-62247    | -0.03763 | 0.373901 | 1063 |
| CENPF | Salubrinol   | 0.035025 | 0.710716 | 1063 |
| CENPF | Saracatinib  | -0.02266 | 0.815448 | 1063 |
| CENPF | Shikonin     | -0.01587 | 0.804869 | 1063 |
| CENPF | Sorafenib    | 0.030454 | 0.814475 | 1063 |
| CENPF | Sunitinib    | 0.001698 | 0.988346 | 1063 |
| CENPF | T0901317     | -0.05784 | 0.15774  | 1063 |
| CENPF | TAE684       | -0.0342  | 0.798162 | 1063 |
| CENPF | TAK-715      | -0.05417 | 0.145581 | 1063 |
| CENPF | TG101348     | -0.10179 | 0.004172 | 1063 |
| CENPF | TGX221       | 0.127478 | 0.03904  | 1063 |
| CENPF | THZ-2-102-1  | -0.07955 | 0.028619 | 1063 |
| CENPF | THZ-2-49     | -0.00966 | 0.820123 | 1063 |
| CENPF | TL-1-85      | -0.04857 | 0.196304 | 1063 |
| CENPF | TL-2-105     | -0.08451 | 0.022006 | 1063 |
| CENPF | TPCA-1       | -0.10965 | 0.0018   | 1063 |
| CENPF | TW 37        | -0.05752 | 0.200472 | 1063 |
| CENPF | Talazoparib  | -0.05249 | 0.243014 | 1063 |
| CENPF | Tamoxifen    | 0.040337 | 0.721944 | 1063 |
| CENPF | Temozolomide | 0.009385 | 0.923036 | 1063 |
| CENPF | Temsirolimus | -0.00372 | 0.954697 | 1063 |
| CENPF | Thapsigargin | 0.036862 | 0.584928 | 1063 |
| CENPF | Tipifarnib   | 0.060805 | 0.306993 | 1063 |
| CENPF | Tivozanib    | -0.0171  | 0.808284 | 1063 |
| CENPF | Trametinib   | 0.251881 | 3.26E-13 | 1063 |
| CENPF | Tubastatin A | -0.08116 | 0.023657 | 1063 |
| CENPF | UNC0638      | -0.05948 | 0.097961 | 1063 |
| CENPF | UNC1215      | 0.017685 | 0.767468 | 1063 |
| CENPF | VNLG/124     | -0.02835 | 0.529522 | 1063 |
| CENPF | VX-11e       | 0.127502 | 0.001711 | 1063 |
| CENPF | VX-680       | -0.07531 | 0.407777 | 1063 |
| CENPF | VX-702       | 0.008927 | 0.979483 | 1063 |
| CENPF | Veliparib    | 0.017925 | 0.825137 | 1063 |
| CENPF | Vinblastine  | 0.005009 | 0.929895 | 1063 |
| CENPF | Vinorelbine  | -0.01155 | 0.869427 | 1063 |
| CENPF | Vorinostat   | -0.13635 | 0.000164 | 1063 |
| CENPF | WH-4-023     | 0.054428 | 0.501861 | 1063 |
| CENPF | WZ-1-84      | 0.048413 | 0.5561   | 1063 |
| CENPF | WZ3105       | -0.07463 | 0.038097 | 1063 |
| CENPF | XAV939       | 0.018615 | 0.667205 | 1063 |
| CENPF | XL-184       | 0.000444 | 0.994375 | 1063 |
| CENPF | XMD11-85h    | 0.022616 | 0.913018 | 1063 |
| CENPF | XMD13-2      | -0.06656 | 0.067832 | 1063 |
| CENPF | XMD14-99     | -0.02942 | 0.473149 | 1063 |
| CENPF | XMD15-27     | -0.06296 | 0.162708 | 1063 |
| CENPF | XMD8-85      | 0.069848 | 0.393413 | 1063 |
| CENPF | XMD8-92      | 0.014299 | 0.925071 | 1063 |
| CENPF | Y-39983      | -0.12291 | 0.000657 | 1063 |
| CENPF | YK 4-279     | 0.082449 | 0.088022 | 1063 |



|       |                    |          |          |       |
|-------|--------------------|----------|----------|-------|
| CENPF | YM155              | -0.02697 | 0.645417 | 1063  |
| CENPF | YM201636           | -0.1114  | 0.001923 | 1063  |
| CENPF | Z-LLN1e-CHO        | 0.092775 | 0.189792 | 1063  |
| CENPF | ZG-10              | -0.10894 | 0.071492 | 1063  |
| CENPF | ZM-447439          | -0.06278 | 0.165053 | 1063  |
| CENPF | ZSTK474            | -0.08964 | 0.013102 | 1063  |
| CENPF | Zibotentan         | 0.00819  | 0.987731 | 1063  |
| CENPF | piperlongumine     | 0.03524  | 0.444599 | 1063  |
| CENPF | rTRAIL             | 0.047341 | 0.51486  | 1063  |
| CENPF | selumetinib        | 0.241574 | 1.15E-12 | 1063  |
| CENPN | (5Z)-7-Oxozeaenol  | 0.079304 | 0.04421  | 55839 |
| CENPN | 17-AAG             | -0.03646 | 0.352256 | 55839 |
| CENPN | 5-Fluorouracil     | 0.095691 | 0.008202 | 55839 |
| CENPN | 681640             | -0.0197  | 0.773224 | 55839 |
| CENPN | A-443654           | -0.04345 | 0.818869 | 55839 |
| CENPN | A-770041           | -0.10133 | 0.168636 | 55839 |
| CENPN | AC220              | 0.063788 | 0.155528 | 55839 |
| CENPN | AG-014699          | 0.031548 | 0.488741 | 55839 |
| CENPN | AICAR              | 0.022961 | 0.599944 | 55839 |
| CENPN | AKT inhibitor VIII | -0.03303 | 0.495292 | 55839 |
| CENPN | AMG-706            | 0.003872 | 0.963335 | 55839 |
| CENPN | AP-24534           | 0.021932 | 0.635013 | 55839 |
| CENPN | AR-42              | 0.044675 | 0.230662 | 55839 |
| CENPN | AS601245           | -0.00833 | 0.908366 | 55839 |
| CENPN | AS605240           | 0.028768 | 0.539106 | 55839 |
| CENPN | AT-7519            | -0.00808 | 0.842775 | 55839 |
| CENPN | ATRA               | 0.055224 | 0.251828 | 55839 |
| CENPN | AUY922             | -0.01775 | 0.77941  | 55839 |
| CENPN | AZ628              | 0.063131 | 0.410017 | 55839 |
| CENPN | AZD6482            | -0.0554  | 0.218197 | 55839 |
| CENPN | AZD7762            | -0.10005 | 0.010254 | 55839 |
| CENPN | AZD8055            | -0.03632 | 0.384426 | 55839 |
| CENPN | Afatinib           | 0.025609 | 0.523741 | 55839 |
| CENPN | Axitinib           | -0.00179 | 0.981964 | 55839 |
| CENPN | BAY 61-3606        | 0.031996 | 0.464622 | 55839 |
| CENPN | BEZ235             | -0.04548 | 0.358536 | 55839 |
| CENPN | BHG712             | 0.020669 | 0.600289 | 55839 |
| CENPN | BI-2536            | -0.11561 | 0.199424 | 55839 |
| CENPN | BIRB 0796          | -0.02836 | 0.61189  | 55839 |
| CENPN | BIX02189           | 0.00457  | 0.916125 | 55839 |
| CENPN | BMS-509744         | -0.01207 | 0.916827 | 55839 |
| CENPN | BMS-536924         | 0.081592 | 0.130265 | 55839 |
| CENPN | BMS-708163         | 0.011876 | 0.797616 | 55839 |
| CENPN | BMS-754807         | 0.107133 | 0.021967 | 55839 |
| CENPN | BMS345541          | -0.00855 | 0.834468 | 55839 |
| CENPN | BX-795             | 0.02666  | 0.602811 | 55839 |
| CENPN | BX-912             | 0.033484 | 0.37323  | 55839 |
| CENPN | Belinostat         | 0.037149 | 0.341655 | 55839 |
| CENPN | Bexarotene         | -0.01209 | 0.908639 | 55839 |
| CENPN | Bicalutamide       | -0.05542 | 0.208543 | 55839 |

|       |                   |          |          |       |
|-------|-------------------|----------|----------|-------|
| CENPN | Bleomycin         | -0.00435 | 0.954487 | 55839 |
| CENPN | Bleomycin (50 uM) | 0.024673 | 0.52778  | 55839 |
| CENPN | Bortezomib        | -0.06468 | 0.4197   | 55839 |
| CENPN | Bosutinib         | -0.08129 | 0.081489 | 55839 |
| CENPN | Bryostatins 1     | -0.01121 | 0.864513 | 55839 |
| CENPN | CAL-101           | -0.02708 | 0.509318 | 55839 |
| CENPN | CAY10603          | 0.054496 | 0.138381 | 55839 |
| CENPN | CCT007093         | -0.02827 | 0.551674 | 55839 |
| CENPN | CCT018159         | -0.04087 | 0.435573 | 55839 |
| CENPN | CEP-701           | -0.03938 | 0.357261 | 55839 |
| CENPN | CGP-082996        | -0.13099 | 0.088085 | 55839 |
| CENPN | CGP-60474         | -0.0909  | 0.246818 | 55839 |
| CENPN | CH5424802         | -0.01183 | 0.879241 | 55839 |
| CENPN | CHIR-99021        | 0.013826 | 0.753677 | 55839 |
| CENPN | CI-1040           | 0.024076 | 0.623306 | 55839 |
| CENPN | CMK               | -0.09044 | 0.381698 | 55839 |
| CENPN | CP466722          | 0.010554 | 0.795553 | 55839 |
| CENPN | CP724714          | 0.03304  | 0.566192 | 55839 |
| CENPN | CUDC-101          | 0.026054 | 0.512454 | 55839 |
| CENPN | CX-5461           | 0.061131 | 0.101168 | 55839 |
| CENPN | Camptothecin      | -0.01507 | 0.776203 | 55839 |
| CENPN | Cetuximab         | 0.002539 | 0.957049 | 55839 |
| CENPN | Cisplatin         | -0.01499 | 0.802386 | 55839 |
| CENPN | Crizotinib        | -0.02705 | 0.877395 | 55839 |
| CENPN | Cyclopamine       | -0.05024 | 0.657922 | 55839 |
| CENPN | Cytarabine        | -0.03756 | 0.47876  | 55839 |
| CENPN | DMOG              | -0.06426 | 0.142943 | 55839 |
| CENPN | Dabrafenib        | 0.03168  | 0.494664 | 55839 |
| CENPN | Dasatinib         | -0.03434 | 0.642013 | 55839 |
| CENPN | Docetaxel         | -0.07587 | 0.044275 | 55839 |
| CENPN | Doxorubicin       | -0.01487 | 0.85094  | 55839 |
| CENPN | EHT 1864          | -0.03252 | 0.650339 | 55839 |
| CENPN | EKB-569           | -0.04074 | 0.331793 | 55839 |
| CENPN | EX-527            | 0.016707 | 0.897134 | 55839 |
| CENPN | Elesclomol        | -0.13639 | 0.000713 | 55839 |
| CENPN | Embelin           | -0.04769 | 0.409356 | 55839 |
| CENPN | Epothilone B      | -0.03744 | 0.481737 | 55839 |
| CENPN | Erlotinib         | 0.039008 | 0.618435 | 55839 |
| CENPN | Etoposide         | -0.02989 | 0.569818 | 55839 |
| CENPN | FH535             | -0.02749 | 0.609382 | 55839 |
| CENPN | FK866             | 0.049961 | 0.183723 | 55839 |
| CENPN | FMK               | -0.00125 | 0.989377 | 55839 |
| CENPN | FR-180204         | 0.028588 | 0.621952 | 55839 |
| CENPN | FTI-277           | 0.030099 | 0.496726 | 55839 |
| CENPN | Foretinib         | 0.044499 | 0.296485 | 55839 |
| CENPN | GDC0449           | 0.00351  | 0.984049 | 55839 |
| CENPN | GDC0941           | -0.01024 | 0.886829 | 55839 |
| CENPN | GNF-2             | 0.031308 | 0.911624 | 55839 |
| CENPN | GSK-650394        | -0.00268 | 0.978737 | 55839 |
| CENPN | GSK1070916        | 0.005267 | 0.903732 | 55839 |

|       |                    |          |          |       |
|-------|--------------------|----------|----------|-------|
| CENPN | GSK1904529A        | -0.01966 | 0.70753  | 55839 |
| CENPN | GSK2126458         | 0.015963 | 0.704487 | 55839 |
| CENPN | GSK269962A         | 0.04602  | 0.370503 | 55839 |
| CENPN | GSK429286A         | 0.024371 | 0.596707 | 55839 |
| CENPN | GSK690693          | -0.04338 | 0.260895 | 55839 |
| CENPN | GW 441756          | -0.06548 | 0.650281 | 55839 |
| CENPN | GW-2580            | 0.080671 | 0.420979 | 55839 |
| CENPN | GW843682X          | -0.11549 | 0.135503 | 55839 |
| CENPN | Gefitinib          | 0.01743  | 0.701199 | 55839 |
| CENPN | Gemcitabine        | -0.05832 | 0.222977 | 55839 |
| CENPN | Genentech Cpd 10   | 0.003313 | 0.940514 | 55839 |
| CENPN | HG-5-113-01        | 0.074904 | 0.271648 | 55839 |
| CENPN | HG-5-88-01         | 0.12546  | 0.161434 | 55839 |
| CENPN | HG-6-64-1          | -0.00662 | 0.916132 | 55839 |
| CENPN | I-BET-762          | 0.004471 | 0.912013 | 55839 |
| CENPN | IOX2               | -0.05842 | 0.290865 | 55839 |
| CENPN | IPA-3              | -0.01652 | 0.712237 | 55839 |
| CENPN | Imatinib           | 0.035343 | 0.842171 | 55839 |
| CENPN | Ispinesib Mesylate | 0.004927 | 0.906531 | 55839 |
| CENPN | JNJ-26854165       | -0.05163 | 0.301215 | 55839 |
| CENPN | JNK Inhibitor VIII | -0.06629 | 0.11597  | 55839 |
| CENPN | JNK-9L             | -0.00496 | 0.951454 | 55839 |
| CENPN | JQ1                | -0.01338 | 0.79419  | 55839 |
| CENPN | JQ12               | 0.004794 | 0.94684  | 55839 |
| CENPN | JW-7-24-1          | 0.005873 | 0.887901 | 55839 |
| CENPN | JW-7-52-1          | -0.07237 | 0.451762 | 55839 |
| CENPN | KIN001-055         | -0.00453 | 0.962381 | 55839 |
| CENPN | KIN001-102         | -0.02354 | 0.543503 | 55839 |
| CENPN | KIN001-135         | 0.085281 | 0.370617 | 55839 |
| CENPN | KIN001-236         | 0.0243   | 0.54685  | 55839 |
| CENPN | KIN001-244         | 0.017845 | 0.663592 | 55839 |
| CENPN | KIN001-260         | 0.021902 | 0.583225 | 55839 |
| CENPN | KIN001-266         | 0.024613 | 0.639891 | 55839 |
| CENPN | KIN001-270         | -0.02111 | 0.632121 | 55839 |
| CENPN | KU-55933           | -0.02069 | 0.777725 | 55839 |
| CENPN | LAQ824             | -0.00815 | 0.861561 | 55839 |
| CENPN | LFM-A13            | -0.02091 | 0.720103 | 55839 |
| CENPN | LY317615           | -0.03915 | 0.389146 | 55839 |
| CENPN | Lapatinib          | 0.080064 | 0.2086   | 55839 |
| CENPN | Lenalidomide       | -0.05012 | 0.478327 | 55839 |
| CENPN | Linifanib          | 0.088565 | 0.045335 | 55839 |
| CENPN | Lisitinib          | 0.099713 | 0.046898 | 55839 |
| CENPN | MG-132             | -0.0842  | 0.310488 | 55839 |
| CENPN | MK-2206            | -0.09449 | 0.043235 | 55839 |
| CENPN | MLN4924            | 0.027492 | 0.660471 | 55839 |
| CENPN | MP470              | 0.007493 | 0.887006 | 55839 |
| CENPN | MPS-1-IN-1         | 0.055576 | 0.148175 | 55839 |
| CENPN | MS-275             | -0.10317 | 0.167362 | 55839 |
| CENPN | Masitinib          | 0.058349 | 0.126552 | 55839 |
| CENPN | Methotrexate       | 0.020233 | 0.618086 | 55839 |

|       |                     |          |          |       |
|-------|---------------------|----------|----------|-------|
| CENPN | Midostaurin         | 0.014283 | 0.784155 | 55839 |
| CENPN | Mitomycin C         | -0.02285 | 0.694903 | 55839 |
| CENPN | NG-25               | 0.046468 | 0.215199 | 55839 |
| CENPN | NPK76-III-72-1      | -0.00169 | 0.967524 | 55839 |
| CENPN | NSC-207895          | -0.02068 | 0.688216 | 55839 |
| CENPN | NSC-87877           | 0.0508   | 0.354834 | 55839 |
| CENPN | NU-7441             | -0.04308 | 0.552539 | 55839 |
| CENPN | Navitoclax          | 0.04866  | 0.208682 | 55839 |
| CENPN | Nilotinib           | 0.031766 | 0.568608 | 55839 |
| CENPN | Nutlin-3a (-)       | 0.09502  | 0.027524 | 55839 |
| CENPN | OSI-027             | 0.035033 | 0.359234 | 55839 |
| CENPN | OSI-930             | 0.054853 | 0.163329 | 55839 |
| CENPN | OSU-03012           | -0.02166 | 0.702334 | 55839 |
| CENPN | Obatoclax Mesylate  | -0.02593 | 0.621082 | 55839 |
| CENPN | Olaparib            | 0.072394 | 0.086967 | 55839 |
| CENPN | PAC-1               | -0.01995 | 0.681332 | 55839 |
| CENPN | PD-0325901          | 0.038161 | 0.366853 | 55839 |
| CENPN | PD-0332991          | 0.025296 | 0.69025  | 55839 |
| CENPN | PD-173074           | -0.00523 | 0.986979 | 55839 |
| CENPN | PF-4708671          | -0.01189 | 0.932611 | 55839 |
| CENPN | PF-562271           | 0.012059 | 0.861835 | 55839 |
| CENPN | PFI-1               | -0.00181 | 0.979095 | 55839 |
| CENPN | PHA-665752          | 0.046205 | 0.760498 | 55839 |
| CENPN | PHA-793887          | 0.017587 | 0.648675 | 55839 |
| CENPN | PI-103              | 0.021987 | 0.578217 | 55839 |
| CENPN | PIK-93              | -0.01645 | 0.67548  | 55839 |
| CENPN | PLX4720             | 0.0524   | 0.208554 | 55839 |
| CENPN | Paclitaxel          | -0.05718 | 0.615667 | 55839 |
| CENPN | Parthenolide        | -0.06299 | 0.54054  | 55839 |
| CENPN | Pazopanib           | 0.026532 | 0.663119 | 55839 |
| CENPN | Phenformin          | 0.024995 | 0.534956 | 55839 |
| CENPN | Pyrimethamine       | -0.05837 | 0.617772 | 55839 |
| CENPN | QL-VIII-58          | 0.01851  | 0.850149 | 55839 |
| CENPN | QL-X-138            | 0.015005 | 0.714024 | 55839 |
| CENPN | QL-XI-92            | 0.0085   | 0.839613 | 55839 |
| CENPN | QL-XII-47           | 0.01956  | 0.663526 | 55839 |
| CENPN | QL-XII-61           | 0.030598 | 0.688583 | 55839 |
| CENPN | QS11                | -0.00969 | 0.907892 | 55839 |
| CENPN | RDEA119             | 0.078329 | 0.032438 | 55839 |
| CENPN | RO-3306             | -0.06681 | 0.110356 | 55839 |
| CENPN | Rapamycin           | -0.08419 | 0.429413 | 55839 |
| CENPN | Roscovitine         | 0.048535 | 0.785714 | 55839 |
| CENPN | Ruxolitinib         | -0.00324 | 0.962418 | 55839 |
| CENPN | S-Trytyl-L-cysteine | -0.05927 | 0.480839 | 55839 |
| CENPN | SB 216763           | 0.057142 | 0.247139 | 55839 |
| CENPN | SB 505124           | 0.032899 | 0.681248 | 55839 |
| CENPN | SB52334             | 0.081674 | 0.054306 | 55839 |
| CENPN | SB590885            | 0.050836 | 0.305269 | 55839 |
| CENPN | SGC0946             | -0.00443 | 0.952718 | 55839 |
| CENPN | SL 0101-1           | 0.064516 | 0.376123 | 55839 |

|       |              |          |          |       |
|-------|--------------|----------|----------|-------|
| CENPN | SN-38        | 0.045108 | 0.317195 | 55839 |
| CENPN | SNX-2112     | 0.017686 | 0.663324 | 55839 |
| CENPN | STF-62247    | -0.01196 | 0.802565 | 55839 |
| CENPN | Salubrinal   | -0.00865 | 0.938494 | 55839 |
| CENPN | Saracatinib  | -0.04307 | 0.630856 | 55839 |
| CENPN | Shikonin     | -0.01085 | 0.868284 | 55839 |
| CENPN | Sorafenib    | 0.093245 | 0.31543  | 55839 |
| CENPN | Sunitinib    | -0.00804 | 0.938878 | 55839 |
| CENPN | TO901317     | -0.03005 | 0.494707 | 55839 |
| CENPN | TAE684       | -0.00504 | 0.975947 | 55839 |
| CENPN | TAK-715      | -0.01377 | 0.73492  | 55839 |
| CENPN | TG101348     | 0.026467 | 0.494026 | 55839 |
| CENPN | TGX221       | 0.03375  | 0.633236 | 55839 |
| CENPN | THZ-2-102-1  | 0.011724 | 0.774285 | 55839 |
| CENPN | THZ-2-49     | -0.02171 | 0.590542 | 55839 |
| CENPN | TL-1-85      | 0.033884 | 0.379935 | 55839 |
| CENPN | TL-2-105     | 0.050826 | 0.184284 | 55839 |
| CENPN | TPCA-1       | 0.017168 | 0.661275 | 55839 |
| CENPN | TW 37        | -0.09103 | 0.027324 | 55839 |
| CENPN | Talazoparib  | 0.053077 | 0.236741 | 55839 |
| CENPN | Tamoxifen    | -0.01115 | 0.945806 | 55839 |
| CENPN | Temozolomide | 0.011704 | 0.902246 | 55839 |
| CENPN | Temsirolimus | -0.1088  | 0.010355 | 55839 |
| CENPN | Thapsigargin | -0.02572 | 0.731225 | 55839 |
| CENPN | Tipifarnib   | -0.02507 | 0.738609 | 55839 |
| CENPN | Tivozanib    | 0.01146  | 0.880432 | 55839 |
| CENPN | Trametinib   | 0.076325 | 0.041057 | 55839 |
| CENPN | Tubastatin A | 0.076298 | 0.034003 | 55839 |
| CENPN | UNC0638      | 0.024609 | 0.517281 | 55839 |
| CENPN | UNC1215      | 0.076331 | 0.100484 | 55839 |
| CENPN | VNLG/124     | 0.062618 | 0.124878 | 55839 |
| CENPN | VX-11e       | 0.041384 | 0.39797  | 55839 |
| CENPN | VX-680       | -0.00394 | 0.978822 | 55839 |
| CENPN | VX-702       | 0.022045 | 0.932405 | 55839 |
| CENPN | Veliparib    | -0.01662 | 0.840051 | 55839 |
| CENPN | Vinblastine  | -0.09682 | 0.018809 | 55839 |
| CENPN | Vinorelbine  | -0.0653  | 0.201619 | 55839 |
| CENPN | Vorinostat   | -0.03892 | 0.310214 | 55839 |
| CENPN | WH-4-023     | -0.00564 | 0.956704 | 55839 |
| CENPN | WZ-1-84      | 0.00169  | 0.987072 | 55839 |
| CENPN | WZ3105       | 0.013527 | 0.732616 | 55839 |
| CENPN | XAV939       | -0.05361 | 0.175938 | 55839 |
| CENPN | XL-184       | 0.082763 | 0.053078 | 55839 |
| CENPN | XMD11-85h    | 0.059802 | 0.716164 | 55839 |
| CENPN | XMD13-2      | 0.00623  | 0.881566 | 55839 |
| CENPN | XMD14-99     | 0.060513 | 0.114737 | 55839 |
| CENPN | XMD15-27     | -0.01519 | 0.786078 | 55839 |
| CENPN | XMD8-85      | -0.03098 | 0.74664  | 55839 |
| CENPN | XMD8-92      | 0.009244 | 0.953892 | 55839 |
| CENPN | Y-39983      | -0.01991 | 0.633869 | 55839 |

|         |                    |          |          |       |
|---------|--------------------|----------|----------|-------|
| CENPN   | YK 4-279           | -0.01208 | 0.861387 | 55839 |
| CENPN   | YM155              | -0.01247 | 0.850582 | 55839 |
| CENPN   | YM201636           | -0.00828 | 0.847268 | 55839 |
| CENPN   | Z-LLN1e-CHO        | -0.07906 | 0.277395 | 55839 |
| CENPN   | ZG-10              | 0.057873 | 0.3915   | 55839 |
| CENPN   | ZM-447439          | 0.010284 | 0.856921 | 55839 |
| CENPN   | ZSTK474            | -0.02281 | 0.565391 | 55839 |
| CENPN   | Zibotentan         | -0.04043 | 0.861754 | 55839 |
| CENPN   | piperlongumine     | -0.0116  | 0.827607 | 55839 |
| CENPN   | rTRAIL             | 0.0025   | 0.980419 | 55839 |
| CENPN   | selumetinib        | 0.07991  | 0.029821 | 55839 |
| DEPDC1B | (5Z)-7-Oxozeaenol  | 0.074763 | 0.060005 | 55789 |
| DEPDC1B | 17-AAG             | 0.196233 | 4.39E-08 | 55789 |
| DEPDC1B | 5-Fluorouracil     | -0.07883 | 0.031189 | 55789 |
| DEPDC1B | 681640             | 0.007796 | 0.916493 | 55789 |
| DEPDC1B | A-443654           | -0.06008 | 0.71583  | 55789 |
| DEPDC1B | A-770041           | 0.003888 | 0.973265 | 55789 |
| DEPDC1B | AC220              | -0.0145  | 0.80778  | 55789 |
| DEPDC1B | AG-014699          | 0.084935 | 0.038652 | 55789 |
| DEPDC1B | AICAR              | -0.10529 | 0.006319 | 55789 |
| DEPDC1B | AKT inhibitor VIII | 0.105906 | 0.011216 | 55789 |
| DEPDC1B | AMG-706            | 0.088919 | 0.079681 | 55789 |
| DEPDC1B | AP-24534           | -0.05958 | 0.149906 | 55789 |
| DEPDC1B | AR-42              | -0.13725 | 9.45E-05 | 55789 |
| DEPDC1B | AS601245           | 0.020935 | 0.739515 | 55789 |
| DEPDC1B | AS605240           | -0.07181 | 0.081766 | 55789 |
| DEPDC1B | AT-7519            | -0.14173 | 5.01E-05 | 55789 |
| DEPDC1B | ATRA               | -0.0243  | 0.661937 | 55789 |
| DEPDC1B | AUY922             | 0.020631 | 0.736724 | 55789 |
| DEPDC1B | AZ628              | 0.090921 | 0.20346  | 55789 |
| DEPDC1B | AZD6482            | 0.0552   | 0.219932 | 55789 |
| DEPDC1B | AZD7762            | -0.12233 | 0.001427 | 55789 |
| DEPDC1B | AZD8055            | -0.04906 | 0.228284 | 55789 |
| DEPDC1B | Afatinib           | 0.011433 | 0.787687 | 55789 |
| DEPDC1B | Axitinib           | -0.02732 | 0.644137 | 55789 |
| DEPDC1B | BAY 61-3606        | -0.00907 | 0.851778 | 55789 |
| DEPDC1B | BEZ235             | 0.056144 | 0.23771  | 55789 |
| DEPDC1B | BHG712             | -0.12517 | 0.000403 | 55789 |
| DEPDC1B | BI-2536            | -0.12161 | 0.171631 | 55789 |
| DEPDC1B | BIRB 0796          | 0.07913  | 0.099771 | 55789 |
| DEPDC1B | BIX02189           | -0.11575 | 0.001198 | 55789 |
| DEPDC1B | BMS-509744         | 0.048377 | 0.616823 | 55789 |
| DEPDC1B | BMS-536924         | 0.01006  | 0.91892  | 55789 |
| DEPDC1B | BMS-708163         | 0.133205 | 0.000482 | 55789 |
| DEPDC1B | BMS-754807         | 0.064917 | 0.207463 | 55789 |
| DEPDC1B | BMS345541          | -0.14068 | 5.94E-05 | 55789 |
| DEPDC1B | BX-795             | -0.03658 | 0.451113 | 55789 |
| DEPDC1B | BX-912             | -0.13351 | 0.00013  | 55789 |
| DEPDC1B | Belinostat         | -0.11505 | 0.001566 | 55789 |
| DEPDC1B | Bexarotene         | 0.023625 | 0.78574  | 55789 |

|         |                   |          |          |       |
|---------|-------------------|----------|----------|-------|
| DEPDC1B | Bicalutamide      | 0.064123 | 0.138685 | 55789 |
| DEPDC1B | Bleomycin         | 0.046965 | 0.396526 | 55789 |
| DEPDC1B | Bleomycin (50 uM) | 0.099978 | 0.005309 | 55789 |
| DEPDC1B | Bortezomib        | 0.048259 | 0.572453 | 55789 |
| DEPDC1B | Bosutinib         | -0.08352 | 0.072388 | 55789 |
| DEPDC1B | Bryostatins 1     | 0.084444 | 0.072835 | 55789 |
| DEPDC1B | CAL-101           | -0.11547 | 0.00151  | 55789 |
| DEPDC1B | CAY10603          | -0.12202 | 0.000545 | 55789 |
| DEPDC1B | CCT007093         | 0.147597 | 0.000194 | 55789 |
| DEPDC1B | CCT018159         | 0.027552 | 0.625156 | 55789 |
| DEPDC1B | CEP-701           | -0.05769 | 0.161275 | 55789 |
| DEPDC1B | CGP-082996        | -0.00969 | 0.941885 | 55789 |
| DEPDC1B | CGP-60474         | 0.013878 | 0.902374 | 55789 |
| DEPDC1B | CH5424802         | -0.05131 | 0.357892 | 55789 |
| DEPDC1B | CHIR-99021        | 0.064894 | 0.089637 | 55789 |
| DEPDC1B | CI-1040           | 0.051295 | 0.247933 | 55789 |
| DEPDC1B | CMK               | 0.052283 | 0.66773  | 55789 |
| DEPDC1B | CP466722          | -0.1442  | 3.67E-05 | 55789 |
| DEPDC1B | CP724714          | 0.086666 | 0.059223 | 55789 |
| DEPDC1B | CUDC-101          | -0.14957 | 2.61E-05 | 55789 |
| DEPDC1B | CX-5461           | -0.13698 | 0.000116 | 55789 |
| DEPDC1B | Camptothecin      | -0.05407 | 0.22066  | 55789 |
| DEPDC1B | Cetuximab         | -0.04565 | 0.276125 | 55789 |
| DEPDC1B | Cisplatin         | 0.049598 | 0.316511 | 55789 |
| DEPDC1B | Crizotinib        | -0.05332 | 0.722811 | 55789 |
| DEPDC1B | Cyclophosphamide  | 0.028481 | 0.82503  | 55789 |
| DEPDC1B | Cytarabine        | -0.01079 | 0.863509 | 55789 |
| DEPDC1B | DMOG              | -0.12027 | 0.002697 | 55789 |
| DEPDC1B | Dabrafenib        | 0.054939 | 0.203193 | 55789 |
| DEPDC1B | Dasatinib         | 0.048212 | 0.496183 | 55789 |
| DEPDC1B | Docetaxel         | 0.140167 | 0.000136 | 55789 |
| DEPDC1B | Doxorubicin       | -0.01213 | 0.8829   | 55789 |
| DEPDC1B | EHT 1864          | 0.089629 | 0.098292 | 55789 |
| DEPDC1B | EKB-569           | -0.10719 | 0.004753 | 55789 |
| DEPDC1B | EX-527            | 0.006255 | 0.965674 | 55789 |
| DEPDC1B | Elesclomol        | 0.041594 | 0.3675   | 55789 |
| DEPDC1B | Embelin           | -0.00236 | 0.978928 | 55789 |
| DEPDC1B | Epothilone B      | -0.00445 | 0.945327 | 55789 |
| DEPDC1B | Erlotinib         | 0.150564 | 0.024856 | 55789 |
| DEPDC1B | Etoposide         | -0.10366 | 0.014134 | 55789 |
| DEPDC1B | FH535             | 0.091618 | 0.033814 | 55789 |
| DEPDC1B | FK866             | -0.11473 | 0.00131  | 55789 |
| DEPDC1B | FMK               | -0.06057 | 0.334622 | 55789 |
| DEPDC1B | FR-180204         | -0.06051 | 0.216823 | 55789 |
| DEPDC1B | FTI-277           | 0.157274 | 4.78E-05 | 55789 |
| DEPDC1B | Foretinib         | -0.06722 | 0.095913 | 55789 |
| DEPDC1B | GDC0449           | 0.018256 | 0.884822 | 55789 |
| DEPDC1B | GDC0941           | -0.0265  | 0.67658  | 55789 |
| DEPDC1B | GNF-2             | -0.05977 | 0.792872 | 55789 |
| DEPDC1B | GSK-650394        | -0.01784 | 0.845765 | 55789 |

|         |                    |          |          |       |
|---------|--------------------|----------|----------|-------|
| DEPDC1B | GSK1070916         | -0.16696 | 2.18E-06 | 55789 |
| DEPDC1B | GSK1904529A        | 0.036555 | 0.44535  | 55789 |
| DEPDC1B | GSK2126458         | -0.1048  | 0.004166 | 55789 |
| DEPDC1B | GSK269962A         | 0.059936 | 0.212491 | 55789 |
| DEPDC1B | GSK429286A         | -0.06623 | 0.103167 | 55789 |
| DEPDC1B | GSK690693          | -0.14308 | 5.48E-05 | 55789 |
| DEPDC1B | GW 441756          | -0.01267 | 0.973676 | 55789 |
| DEPDC1B | GW-2580            | -0.0319  | 0.941501 | 55789 |
| DEPDC1B | GW843682X          | -0.15131 | 0.040082 | 55789 |
| DEPDC1B | Gefitinib          | 0.011798 | 0.801212 | 55789 |
| DEPDC1B | Gemcitabine        | -0.10031 | 0.022298 | 55789 |
| DEPDC1B | Genentech Cpd 10   | -0.11391 | 0.001506 | 55789 |
| DEPDC1B | HG-5-113-01        | -0.06609 | 0.34456  | 55789 |
| DEPDC1B | HG-5-88-01         | -0.00199 | 0.994588 | 55789 |
| DEPDC1B | HG-6-64-1          | 0.015663 | 0.788713 | 55789 |
| DEPDC1B | I-BET-762          | -0.14229 | 3.65E-05 | 55789 |
| DEPDC1B | IOX2               | 0.017578 | 0.803602 | 55789 |
| DEPDC1B | IPA-3              | -0.07291 | 0.06302  | 55789 |
| DEPDC1B | Imatinib           | -0.06976 | 0.618736 | 55789 |
| DEPDC1B | Ispinesib Mesylate | -0.09009 | 0.01322  | 55789 |
| DEPDC1B | JNJ-26854165       | 0.002024 | 0.97925  | 55789 |
| DEPDC1B | JNK Inhibitor VIII | 0.052895 | 0.219329 | 55789 |
| DEPDC1B | JNK-9L             | -0.00429 | 0.958015 | 55789 |
| DEPDC1B | JQ1                | -0.01377 | 0.788039 | 55789 |
| DEPDC1B | JQ12               | -0.01964 | 0.755549 | 55789 |
| DEPDC1B | JW-7-24-1          | -0.11358 | 0.001303 | 55789 |
| DEPDC1B | JW-7-52-1          | 0.009939 | 0.941531 | 55789 |
| DEPDC1B | KIN001-055         | -0.04843 | 0.421144 | 55789 |
| DEPDC1B | KIN001-102         | -0.12019 | 0.000607 | 55789 |
| DEPDC1B | KIN001-135         | 0.158627 | 0.061518 | 55789 |
| DEPDC1B | KIN001-236         | -0.08101 | 0.027857 | 55789 |
| DEPDC1B | KIN001-244         | -0.10902 | 0.00247  | 55789 |
| DEPDC1B | KIN001-260         | -0.09217 | 0.01053  | 55789 |
| DEPDC1B | KIN001-266         | -0.07979 | 0.07312  | 55789 |
| DEPDC1B | KIN001-270         | -0.09421 | 0.013202 | 55789 |
| DEPDC1B | KU-55933           | -0.07074 | 0.187109 | 55789 |
| DEPDC1B | LAQ824             | -0.11547 | 0.002323 | 55789 |
| DEPDC1B | LFM-A13            | 0.084348 | 0.071056 | 55789 |
| DEPDC1B | LY317615           | -0.07101 | 0.091514 | 55789 |
| DEPDC1B | Lapatinib          | 0.200856 | 0.000556 | 55789 |
| DEPDC1B | Lenalidomide       | -0.03094 | 0.71235  | 55789 |
| DEPDC1B | Linifanib          | -0.01004 | 0.880341 | 55789 |
| DEPDC1B | Lisitinib          | 0.038649 | 0.562754 | 55789 |
| DEPDC1B | MG-132             | 0.056613 | 0.537757 | 55789 |
| DEPDC1B | MK-2206            | -0.06129 | 0.2174   | 55789 |
| DEPDC1B | MLN4924            | 0.069887 | 0.193735 | 55789 |
| DEPDC1B | MP470              | -0.03588 | 0.428624 | 55789 |
| DEPDC1B | MPS-1-IN-1         | -0.09171 | 0.013248 | 55789 |
| DEPDC1B | MS-275             | -0.16847 | 0.015007 | 55789 |
| DEPDC1B | Masitinib          | -0.08993 | 0.014955 | 55789 |



|         |                     |          |          |       |
|---------|---------------------|----------|----------|-------|
| DEPDC1B | Methotrexate        | -0.13364 | 0.000234 | 55789 |
| DEPDC1B | Midostaurin         | 0.047519 | 0.295291 | 55789 |
| DEPDC1B | Mitomycin C         | -0.06673 | 0.164874 | 55789 |
| DEPDC1B | NG-25               | -0.12715 | 0.000304 | 55789 |
| DEPDC1B | NPK76-II-72-1       | -0.2059  | 1.3E-09  | 55789 |
| DEPDC1B | NSC-207895          | -0.17937 | 4.28E-06 | 55789 |
| DEPDC1B | NSC-87877           | 0.078396 | 0.129298 | 55789 |
| DEPDC1B | NU-7441             | -0.0151  | 0.876433 | 55789 |
| DEPDC1B | Navitoclax          | -0.23838 | 1.59E-11 | 55789 |
| DEPDC1B | Nilotinib           | -0.08974 | 0.048632 | 55789 |
| DEPDC1B | Nutlin-3a (-)       | 0.056546 | 0.227754 | 55789 |
| DEPDC1B | OSI-027             | -0.12202 | 0.000589 | 55789 |
| DEPDC1B | OSI-930             | -0.07109 | 0.064972 | 55789 |
| DEPDC1B | OSU-03012           | -0.02455 | 0.658456 | 55789 |
| DEPDC1B | Obatoclax Mesylate  | -0.03507 | 0.480936 | 55789 |
| DEPDC1B | Olaparib            | 0.050314 | 0.253043 | 55789 |
| DEPDC1B | PAC-1               | -0.11238 | 0.00434  | 55789 |
| DEPDC1B | PD-0325901          | 0.112038 | 0.003613 | 55789 |
| DEPDC1B | PD-0332991          | 0.024972 | 0.694854 | 55789 |
| DEPDC1B | PD-173074           | 0.069919 | 0.534852 | 55789 |
| DEPDC1B | PF-4708671          | 0.096432 | 0.23058  | 55789 |
| DEPDC1B | PF-562271           | 0.021176 | 0.740659 | 55789 |
| DEPDC1B | PFI-1               | -0.00747 | 0.903816 | 55789 |
| DEPDC1B | PHA-665752          | 0.136633 | 0.19743  | 55789 |
| DEPDC1B | PHA-793887          | -0.14793 | 1.85E-05 | 55789 |
| DEPDC1B | PI-103              | -0.13551 | 0.000124 | 55789 |
| DEPDC1B | PIK-93              | -0.1361  | 9.05E-05 | 55789 |
| DEPDC1B | PLX4720             | 0.083691 | 0.034167 | 55789 |
| DEPDC1B | Paclitaxel          | -0.03017 | 0.819375 | 55789 |
| DEPDC1B | Parthenolide        | -0.04248 | 0.705472 | 55789 |
| DEPDC1B | Pazopanib           | 0.065619 | 0.201981 | 55789 |
| DEPDC1B | Phenformin          | -0.06486 | 0.083896 | 55789 |
| DEPDC1B | Pyrimethamine       | -0.01327 | 0.930354 | 55789 |
| DEPDC1B | QL-VIII-58          | 0.060138 | 0.430802 | 55789 |
| DEPDC1B | QL-X-138            | -0.12258 | 0.000617 | 55789 |
| DEPDC1B | QL-XI-92            | -0.12706 | 0.000329 | 55789 |
| DEPDC1B | QL-XII-47           | -0.08149 | 0.035827 | 55789 |
| DEPDC1B | QL-XII-61           | -0.0856  | 0.172594 | 55789 |
| DEPDC1B | QS11                | -0.02771 | 0.68866  | 55789 |
| DEPDC1B | RDEA119             | 0.131001 | 0.000197 | 55789 |
| DEPDC1B | RO-3306             | 0.090716 | 0.026411 | 55789 |
| DEPDC1B | Rapamycin           | -0.04114 | 0.759006 | 55789 |
| DEPDC1B | Roscovitine         | 0.073181 | 0.637078 | 55789 |
| DEPDC1B | Ruxolitinib         | -0.05605 | 0.249934 | 55789 |
| DEPDC1B | S-Trityl-L-cysteine | -0.09763 | 0.198048 | 55789 |
| DEPDC1B | SB 216763           | 0.088394 | 0.06078  | 55789 |
| DEPDC1B | SB 505124           | 0.08477  | 0.169408 | 55789 |
| DEPDC1B | SB52334             | 0.018502 | 0.7444   | 55789 |
| DEPDC1B | SB590885            | 0.101572 | 0.022067 | 55789 |
| DEPDC1B | SGC0946             | 0.024747 | 0.682745 | 55789 |

|         |              |          |          |       |
|---------|--------------|----------|----------|-------|
| DEPDC1B | SL 0101-1    | 0.06266  | 0.393454 | 55789 |
| DEPDC1B | SN-38        | 0.005291 | 0.926194 | 55789 |
| DEPDC1B | SNX-2112     | -0.06548 | 0.076803 | 55789 |
| DEPDC1B | STF-62247    | -0.116   | 0.002471 | 55789 |
| DEPDC1B | Salubrinal   | -0.01346 | 0.901848 | 55789 |
| DEPDC1B | Saracatinib  | -0.00683 | 0.950654 | 55789 |
| DEPDC1B | Shikonin     | -0.06224 | 0.215236 | 55789 |
| DEPDC1B | Sorafenib    | 0.018214 | 0.893858 | 55789 |
| DEPDC1B | Sunitinib    | -0.04911 | 0.541169 | 55789 |
| DEPDC1B | T0901317     | -0.0585  | 0.152551 | 55789 |
| DEPDC1B | TAE684       | -0.01906 | 0.900007 | 55789 |
| DEPDC1B | TAK-715      | -0.14157 | 5.92E-05 | 55789 |
| DEPDC1B | TG101348     | -0.13256 | 0.000155 | 55789 |
| DEPDC1B | TGX221       | 0.190992 | 0.001203 | 55789 |
| DEPDC1B | THZ-2-102-1  | -0.11805 | 0.000913 | 55789 |
| DEPDC1B | THZ-2-49     | -0.04649 | 0.222831 | 55789 |
| DEPDC1B | TL-1-85      | -0.12301 | 0.000507 | 55789 |
| DEPDC1B | TL-2-105     | -0.12346 | 0.000618 | 55789 |
| DEPDC1B | TPCA-1       | -0.18518 | 6.6E-08  | 55789 |
| DEPDC1B | TW 37        | -0.02639 | 0.607752 | 55789 |
| DEPDC1B | Talazoparib  | 0.029505 | 0.544405 | 55789 |
| DEPDC1B | Tamoxifen    | 0.052022 | 0.623686 | 55789 |
| DEPDC1B | Temozolomide | 0.003265 | 0.975783 | 55789 |
| DEPDC1B | Temsirolimus | -0.00267 | 0.968282 | 55789 |
| DEPDC1B | Thapsigargin | -0.00744 | 0.935754 | 55789 |
| DEPDC1B | Tipifarnib   | -0.00824 | 0.927749 | 55789 |
| DEPDC1B | Tivozanib    | -0.05102 | 0.360466 | 55789 |
| DEPDC1B | Trametinib   | 0.128096 | 0.000372 | 55789 |
| DEPDC1B | Tubastatin A | -0.13384 | 0.000135 | 55789 |
| DEPDC1B | UNC0638      | -0.06752 | 0.058663 | 55789 |
| DEPDC1B | UNC1215      | 0.096531 | 0.03188  | 55789 |
| DEPDC1B | VNLG/124     | -0.03514 | 0.42344  | 55789 |
| DEPDC1B | VX-11e       | 0.020697 | 0.707037 | 55789 |
| DEPDC1B | VX-680       | -0.14079 | 0.072503 | 55789 |
| DEPDC1B | VX-702       | -0.00863 | 0.979793 | 55789 |
| DEPDC1B | Veliparib    | 0.028752 | 0.693755 | 55789 |
| DEPDC1B | Vinblastine  | -0.01104 | 0.837713 | 55789 |
| DEPDC1B | Vinorelbine  | -0.04528 | 0.411868 | 55789 |
| DEPDC1B | Vorinostat   | -0.17409 | 1.18E-06 | 55789 |
| DEPDC1B | WH-4-023     | 0.080333 | 0.289316 | 55789 |
| DEPDC1B | WZ-1-84      | 0.121759 | 0.084749 | 55789 |
| DEPDC1B | WZ3105       | -0.10503 | 0.002972 | 55789 |
| DEPDC1B | XAV939       | 0.020531 | 0.632803 | 55789 |
| DEPDC1B | XL-184       | -0.02044 | 0.702131 | 55789 |
| DEPDC1B | XMD11-85h    | -0.00501 | 0.983275 | 55789 |
| DEPDC1B | XMD13-2      | -0.08441 | 0.018989 | 55789 |
| DEPDC1B | XMD14-99     | -0.05766 | 0.134892 | 55789 |
| DEPDC1B | XMD15-27     | -0.03951 | 0.419395 | 55789 |
| DEPDC1B | XMD8-85      | 0.057052 | 0.502809 | 55789 |
| DEPDC1B | XMD8-92      | -0.06193 | 0.557221 | 55789 |

|         |                    |          |          |       |
|---------|--------------------|----------|----------|-------|
| DEPDC1B | Y-39983            | -0.08806 | 0.01706  | 55789 |
| DEPDC1B | YK 4-279           | 0.045481 | 0.402513 | 55789 |
| DEPDC1B | YM155              | -0.10595 | 0.015944 | 55789 |
| DEPDC1B | YM201636           | -0.10333 | 0.004173 | 55789 |
| DEPDC1B | Z-LLN1e-CHO        | -0.02693 | 0.755893 | 55789 |
| DEPDC1B | ZG-10              | -0.05606 | 0.408794 | 55789 |
| DEPDC1B | ZM-447439          | -0.09434 | 0.026746 | 55789 |
| DEPDC1B | ZSTK474            | -0.13594 | 0.000121 | 55789 |
| DEPDC1B | Zibotentan         | 0.012886 | 0.976549 | 55789 |
| DEPDC1B | piperlongumine     | 0.051016 | 0.242478 | 55789 |
| DEPDC1B | rTRAIL             | 0.093163 | 0.119637 | 55789 |
| DEPDC1B | selumetinib        | 0.112304 | 0.001693 | 55789 |
| DLGAP5  | (5Z)-7-Oxozeaenol  | 0.149947 | 4.7E-05  | 9787  |
| DLGAP5  | 17-AAG             | 0.094821 | 0.01062  | 9787  |
| DLGAP5  | 5-Fluorouracil     | 0.045946 | 0.224524 | 9787  |
| DLGAP5  | 681640             | -0.03279 | 0.607084 | 9787  |
| DLGAP5  | A-443654           | -0.07713 | 0.616739 | 9787  |
| DLGAP5  | A-770041           | -0.03746 | 0.683897 | 9787  |
| DLGAP5  | AC220              | 0.01546  | 0.793436 | 9787  |
| DLGAP5  | AG-014699          | 0.032115 | 0.480542 | 9787  |
| DLGAP5  | AICAR              | -0.05826 | 0.149585 | 9787  |
| DLGAP5  | AKT inhibitor VIII | 0.058531 | 0.190183 | 9787  |
| DLGAP5  | AMG-706            | 0.013426 | 0.861017 | 9787  |
| DLGAP5  | AP-24534           | 0.002168 | 0.966814 | 9787  |
| DLGAP5  | AR-42              | -0.00882 | 0.827118 | 9787  |
| DLGAP5  | AS601245           | 0.047546 | 0.377274 | 9787  |
| DLGAP5  | AS605240           | 0.061415 | 0.144378 | 9787  |
| DLGAP5  | AT-7519            | -0.08675 | 0.015279 | 9787  |
| DLGAP5  | ATRA               | 0.006756 | 0.915121 | 9787  |
| DLGAP5  | AUY922             | 0.025799 | 0.661707 | 9787  |
| DLGAP5  | AZ628              | 0.186667 | 0.002956 | 9787  |
| DLGAP5  | AZD6482            | 0.03407  | 0.493446 | 9787  |
| DLGAP5  | AZD7762            | -0.08184 | 0.039182 | 9787  |
| DLGAP5  | AZD8055            | -0.02997 | 0.48135  | 9787  |
| DLGAP5  | Afatinib           | 0.047184 | 0.216684 | 9787  |
| DLGAP5  | Axitinib           | -0.03591 | 0.519175 | 9787  |
| DLGAP5  | BAY 61-3606        | 0.019673 | 0.667346 | 9787  |
| DLGAP5  | BEZ235             | 0.003739 | 0.951857 | 9787  |
| DLGAP5  | BHG712             | 0.044562 | 0.237641 | 9787  |
| DLGAP5  | BI-2536            | -0.11178 | 0.217495 | 9787  |
| DLGAP5  | BIRB 0796          | 0.001634 | 0.980666 | 9787  |
| DLGAP5  | BIX02189           | -0.00481 | 0.911378 | 9787  |
| DLGAP5  | BMS-509744         | 0.007984 | 0.945207 | 9787  |
| DLGAP5  | BMS-536924         | 0.035692 | 0.62168  | 9787  |
| DLGAP5  | BMS-708163         | 0.059058 | 0.142325 | 9787  |
| DLGAP5  | BMS-754807         | 0.058236 | 0.266456 | 9787  |
| DLGAP5  | BMS345541          | -0.06806 | 0.061504 | 9787  |
| DLGAP5  | BX-795             | -0.05192 | 0.256563 | 9787  |
| DLGAP5  | BX-912             | -0.07333 | 0.041306 | 9787  |
| DLGAP5  | Belinostat         | -0.01072 | 0.79897  | 9787  |

|        |                   |          |          |      |
|--------|-------------------|----------|----------|------|
| DLGAP5 | Bexarotene        | -0.00394 | 0.974064 | 9787 |
| DLGAP5 | Bicalutamide      | -0.01193 | 0.824787 | 9787 |
| DLGAP5 | Bleomycin         | 0.054548 | 0.308536 | 9787 |
| DLGAP5 | Bleomycin (50 uM) | 0.019131 | 0.629462 | 9787 |
| DLGAP5 | Bortezomib        | 0.044216 | 0.611797 | 9787 |
| DLGAP5 | Bosutinib         | -0.04649 | 0.384592 | 9787 |
| DLGAP5 | Bryostatins 1     | 0.065674 | 0.181285 | 9787 |
| DLGAP5 | CAL-101           | -0.04182 | 0.288832 | 9787 |
| DLGAP5 | CAY10603          | -0.01721 | 0.662757 | 9787 |
| DLGAP5 | CCT007093         | 0.06158  | 0.150625 | 9787 |
| DLGAP5 | CCT018159         | -0.03865 | 0.466429 | 9787 |
| DLGAP5 | CEP-701           | -0.0031  | 0.951045 | 9787 |
| DLGAP5 | CGP-082996        | -0.03296 | 0.770367 | 9787 |
| DLGAP5 | CGP-60474         | -0.05857 | 0.506127 | 9787 |
| DLGAP5 | CH5424802         | -0.01866 | 0.797029 | 9787 |
| DLGAP5 | CHIR-99021        | 0.045574 | 0.247822 | 9787 |
| DLGAP5 | CI-1040           | 0.144294 | 0.000224 | 9787 |
| DLGAP5 | CMK               | 0.02337  | 0.870076 | 9787 |
| DLGAP5 | CP466722          | -0.07419 | 0.040131 | 9787 |
| DLGAP5 | CP724714          | 0.037943 | 0.499229 | 9787 |
| DLGAP5 | CUDC-101          | -0.03443 | 0.377029 | 9787 |
| DLGAP5 | CX-5461           | -0.0408  | 0.289026 | 9787 |
| DLGAP5 | Camptothecin      | -0.06077 | 0.16127  | 9787 |
| DLGAP5 | Cetuximab         | 0.030918 | 0.477079 | 9787 |
| DLGAP5 | Cisplatin         | -0.04387 | 0.385013 | 9787 |
| DLGAP5 | Crizotinib        | -0.02154 | 0.905903 | 9787 |
| DLGAP5 | Cyclopamine       | 0.015088 | 0.916722 | 9787 |
| DLGAP5 | Cytarabine        | -0.01689 | 0.778946 | 9787 |
| DLGAP5 | DMOG              | -0.0637  | 0.147047 | 9787 |
| DLGAP5 | Dabrafenib        | 0.163936 | 1.42E-05 | 9787 |
| DLGAP5 | Dasatinib         | 0.018238 | 0.815719 | 9787 |
| DLGAP5 | Docetaxel         | -0.01255 | 0.760346 | 9787 |
| DLGAP5 | Doxorubicin       | -0.00273 | 0.975314 | 9787 |
| DLGAP5 | EHT 1864          | 0.070468 | 0.223121 | 9787 |
| DLGAP5 | EKB-569           | -0.03016 | 0.487139 | 9787 |
| DLGAP5 | EX-527            | 0.008933 | 0.949178 | 9787 |
| DLGAP5 | Elesclomol        | -0.08067 | 0.057749 | 9787 |
| DLGAP5 | Embelin           | 0.008181 | 0.920365 | 9787 |
| DLGAP5 | Epothilone B      | -0.0001  | 0.998333 | 9787 |
| DLGAP5 | Erlotinib         | 0.087095 | 0.229895 | 9787 |
| DLGAP5 | Etoposide         | -0.08157 | 0.06163  | 9787 |
| DLGAP5 | FH535             | 0.08557  | 0.050183 | 9787 |
| DLGAP5 | FK866             | -0.07607 | 0.037483 | 9787 |
| DLGAP5 | FMK               | 0.042109 | 0.541881 | 9787 |
| DLGAP5 | FR-180204         | 0.059632 | 0.224611 | 9787 |
| DLGAP5 | FTI-277           | 0.116277 | 0.003193 | 9787 |
| DLGAP5 | Foretinib         | -0.01617 | 0.738517 | 9787 |
| DLGAP5 | GDC0449           | 0.028602 | 0.798914 | 9787 |
| DLGAP5 | GDC0941           | -0.04899 | 0.37035  | 9787 |
| DLGAP5 | GNF-2             | 0.012803 | 0.970663 | 9787 |

|        |                    |          |          |      |
|--------|--------------------|----------|----------|------|
| DLGAP5 | GSK-650394         | -0.00147 | 0.988102 | 9787 |
| DLGAP5 | GSK1070916         | -0.07385 | 0.046296 | 9787 |
| DLGAP5 | GSK1904529A        | 0.040133 | 0.396542 | 9787 |
| DLGAP5 | GSK2126458         | -0.02919 | 0.468716 | 9787 |
| DLGAP5 | GSK269962A         | 0.016901 | 0.789982 | 9787 |
| DLGAP5 | GSK429286A         | -0.04295 | 0.316643 | 9787 |
| DLGAP5 | GSK690693          | -0.09694 | 0.007667 | 9787 |
| DLGAP5 | GW 441756          | 0.001014 | 0.99674  | 9787 |
| DLGAP5 | GW-2580            | 0.033946 | 0.937849 | 9787 |
| DLGAP5 | GW843682X          | -0.12997 | 0.085767 | 9787 |
| DLGAP5 | Gefitinib          | 0.034224 | 0.430202 | 9787 |
| DLGAP5 | Gemcitabine        | -0.05884 | 0.218014 | 9787 |
| DLGAP5 | Genentech Cpd 10   | -0.0537  | 0.156356 | 9787 |
| DLGAP5 | HG-5-113-01        | -0.02415 | 0.776057 | 9787 |
| DLGAP5 | HG-5-88-01         | 0.035975 | 0.830258 | 9787 |
| DLGAP5 | HG-6-64-1          | 0.047828 | 0.321444 | 9787 |
| DLGAP5 | I-BET-762          | -0.0186  | 0.627314 | 9787 |
| DLGAP5 | IOX2               | -0.02939 | 0.638484 | 9787 |
| DLGAP5 | IPA-3              | -0.025   | 0.560887 | 9787 |
| DLGAP5 | Imatinib           | -0.00313 | 0.989907 | 9787 |
| DLGAP5 | Ispinesib Mesylate | -0.01031 | 0.805051 | 9787 |
| DLGAP5 | JNJ-26854165       | -0.00426 | 0.952875 | 9787 |
| DLGAP5 | JNK Inhibitor VIII | -0.01529 | 0.750405 | 9787 |
| DLGAP5 | JNK-9L             | 0.054138 | 0.316048 | 9787 |
| DLGAP5 | JQ1                | 0.053821 | 0.206167 | 9787 |
| DLGAP5 | JQ12               | 0.053743 | 0.31047  | 9787 |
| DLGAP5 | JW-7-24-1          | -0.0315  | 0.410288 | 9787 |
| DLGAP5 | JW-7-52-1          | 0.005868 | 0.967179 | 9787 |
| DLGAP5 | KIN001-055         | 0.000437 | 0.996408 | 9787 |
| DLGAP5 | KIN001-102         | -0.05714 | 0.11739  | 9787 |
| DLGAP5 | KIN001-135         | 0.09436  | 0.309468 | 9787 |
| DLGAP5 | KIN001-236         | 0.035071 | 0.370817 | 9787 |
| DLGAP5 | KIN001-244         | -0.02775 | 0.484521 | 9787 |
| DLGAP5 | KIN001-260         | -0.01467 | 0.720053 | 9787 |
| DLGAP5 | KIN001-266         | 0.031927 | 0.530153 | 9787 |
| DLGAP5 | KIN001-270         | -0.08829 | 0.020855 | 9787 |
| DLGAP5 | KU-55933           | -0.06611 | 0.224499 | 9787 |
| DLGAP5 | LAQ824             | -0.00842 | 0.856763 | 9787 |
| DLGAP5 | LFM-A13            | 0.02685  | 0.63524  | 9787 |
| DLGAP5 | LY317615           | -0.00818 | 0.880244 | 9787 |
| DLGAP5 | Lapatinib          | 0.087136 | 0.168274 | 9787 |
| DLGAP5 | Lenalidomide       | -0.04461 | 0.543618 | 9787 |
| DLGAP5 | Linifanib          | 0.033194 | 0.548342 | 9787 |
| DLGAP5 | Lisitinib          | 0.048424 | 0.437796 | 9787 |
| DLGAP5 | MG-132             | 0.037315 | 0.711986 | 9787 |
| DLGAP5 | MK-2206            | -0.09118 | 0.052214 | 9787 |
| DLGAP5 | MLN4924            | 0.054053 | 0.334173 | 9787 |
| DLGAP5 | MP470              | -0.02544 | 0.586608 | 9787 |
| DLGAP5 | MPS-1-IN-1         | 0.013731 | 0.749854 | 9787 |
| DLGAP5 | MS-275             | -0.09368 | 0.221336 | 9787 |

|        |                     |          |          |      |
|--------|---------------------|----------|----------|------|
| DLGAP5 | Masitinib           | 0.018429 | 0.662233 | 9787 |
| DLGAP5 | Methotrexate        | -0.01596 | 0.698476 | 9787 |
| DLGAP5 | Midostaurin         | 0.010508 | 0.842782 | 9787 |
| DLGAP5 | Mitomycin C         | -0.00383 | 0.95717  | 9787 |
| DLGAP5 | NG-25               | -0.01443 | 0.719771 | 9787 |
| DLGAP5 | NPK76-II-72-1       | -0.08745 | 0.013347 | 9787 |
| DLGAP5 | NSC-207895          | -0.12148 | 0.002268 | 9787 |
| DLGAP5 | NSC-87877           | 0.103204 | 0.040356 | 9787 |
| DLGAP5 | NU-7441             | -0.04081 | 0.579682 | 9787 |
| DLGAP5 | Navitoclax          | -0.10965 | 0.002912 | 9787 |
| DLGAP5 | Nilotinib           | -0.02789 | 0.625107 | 9787 |
| DLGAP5 | Nutlin-3a (-)       | 0.141897 | 0.000547 | 9787 |
| DLGAP5 | OSI-027             | -0.04077 | 0.281247 | 9787 |
| DLGAP5 | OSI-930             | 0.009768 | 0.830715 | 9787 |
| DLGAP5 | OSU-03012           | 0.007771 | 0.905321 | 9787 |
| DLGAP5 | Obatoclax Mesylate  | 0.048159 | 0.312288 | 9787 |
| DLGAP5 | Olaparib            | -0.01853 | 0.70777  | 9787 |
| DLGAP5 | PAC-1               | -0.00095 | 0.986071 | 9787 |
| DLGAP5 | PD-0325901          | 0.18156  | 1.06E-06 | 9787 |
| DLGAP5 | PD-0332991          | 0.058958 | 0.2625   | 9787 |
| DLGAP5 | PD-173074           | -0.01267 | 0.952297 | 9787 |
| DLGAP5 | PF-4708671          | 0.078727 | 0.349857 | 9787 |
| DLGAP5 | PF-562271           | 0.013367 | 0.845052 | 9787 |
| DLGAP5 | PFI-1               | 0.055345 | 0.238508 | 9787 |
| DLGAP5 | PHA-665752          | 0.08102  | 0.553314 | 9787 |
| DLGAP5 | PHA-793887          | -0.05252 | 0.147829 | 9787 |
| DLGAP5 | PI-103              | -0.06339 | 0.084393 | 9787 |
| DLGAP5 | PIK-93              | -0.0574  | 0.114099 | 9787 |
| DLGAP5 | PLX4720             | 0.156669 | 1.74E-05 | 9787 |
| DLGAP5 | Paclitaxel          | -0.0509  | 0.66279  | 9787 |
| DLGAP5 | Parthenolide        | 0.00247  | 0.987129 | 9787 |
| DLGAP5 | Pazopanib           | 0.035299 | 0.54514  | 9787 |
| DLGAP5 | Phenformin          | -0.01522 | 0.715266 | 9787 |
| DLGAP5 | Pyrimethamine       | 0.000208 | 0.999099 | 9787 |
| DLGAP5 | QL-VIII-58          | -0.01416 | 0.891392 | 9787 |
| DLGAP5 | QL-X-138            | -0.07262 | 0.049044 | 9787 |
| DLGAP5 | QL-XI-92            | -0.03553 | 0.355578 | 9787 |
| DLGAP5 | QL-XII-47           | -0.046   | 0.262844 | 9787 |
| DLGAP5 | QL-XII-61           | -0.06699 | 0.309755 | 9787 |
| DLGAP5 | QS11                | -0.03904 | 0.543063 | 9787 |
| DLGAP5 | RDEA119             | 0.220402 | 1.02E-10 | 9787 |
| DLGAP5 | RO-3306             | 0.005203 | 0.917945 | 9787 |
| DLGAP5 | Rapamycin           | -0.09528 | 0.358297 | 9787 |
| DLGAP5 | Roscovitine         | 0.043365 | 0.817195 | 9787 |
| DLGAP5 | Ruxolitinib         | -0.00165 | 0.980597 | 9787 |
| DLGAP5 | S-Trityl-L-cysteine | -0.04554 | 0.607206 | 9787 |
| DLGAP5 | SB 216763           | 0.050964 | 0.307136 | 9787 |
| DLGAP5 | SB 505124           | 0.038927 | 0.610744 | 9787 |
| DLGAP5 | SB52334             | 0.052687 | 0.256492 | 9787 |
| DLGAP5 | SB590885            | 0.185102 | 2.58E-06 | 9787 |

|        |              |          |          |      |
|--------|--------------|----------|----------|------|
| DLGAP5 | SGC0946      | 0.03606  | 0.518122 | 9787 |
| DLGAP5 | SL 0101-1    | 0.0745   | 0.309023 | 9787 |
| DLGAP5 | SN-38        | -0.01146 | 0.834049 | 9787 |
| DLGAP5 | SNX-2112     | -0.01572 | 0.701064 | 9787 |
| DLGAP5 | STF-62247    | 0.018647 | 0.686783 | 9787 |
| DLGAP5 | Salubrial    | 0.017107 | 0.872538 | 9787 |
| DLGAP5 | Saracatinib  | -0.02723 | 0.773979 | 9787 |
| DLGAP5 | Shikonin     | -0.01589 | 0.804616 | 9787 |
| DLGAP5 | Sorafenib    | 0.051174 | 0.657139 | 9787 |
| DLGAP5 | Sunitinib    | -0.00591 | 0.956897 | 9787 |
| DLGAP5 | TO901317     | -0.02035 | 0.657147 | 9787 |
| DLGAP5 | TAE684       | -0.04005 | 0.751928 | 9787 |
| DLGAP5 | TAK-715      | -0.04859 | 0.195442 | 9787 |
| DLGAP5 | TG101348     | -0.03678 | 0.331073 | 9787 |
| DLGAP5 | TGX221       | 0.120239 | 0.052844 | 9787 |
| DLGAP5 | THZ-2-102-1  | -0.03539 | 0.355548 | 9787 |
| DLGAP5 | THZ-2-49     | 0.012392 | 0.76673  | 9787 |
| DLGAP5 | TL-1-85      | -0.00843 | 0.840953 | 9787 |
| DLGAP5 | TL-2-105     | -0.02842 | 0.477513 | 9787 |
| DLGAP5 | TPCA-1       | -0.04415 | 0.232438 | 9787 |
| DLGAP5 | TW 37        | -0.07736 | 0.068467 | 9787 |
| DLGAP5 | Talazoparib  | -0.00255 | 0.964788 | 9787 |
| DLGAP5 | Tamoxifen    | 0.008422 | 0.960839 | 9787 |
| DLGAP5 | Temozolomide | 0.005602 | 0.956503 | 9787 |
| DLGAP5 | Temsirolimus | -0.06642 | 0.153434 | 9787 |
| DLGAP5 | Thapsigargin | 0.012281 | 0.889901 | 9787 |
| DLGAP5 | Tipifarnib   | 0.026586 | 0.720596 | 9787 |
| DLGAP5 | Tivozanib    | -0.02201 | 0.744089 | 9787 |
| DLGAP5 | Trametinib   | 0.228459 | 5.02E-11 | 9787 |
| DLGAP5 | Tubastatin A | 0.002299 | 0.956782 | 9787 |
| DLGAP5 | UNC0638      | 0.01033  | 0.797346 | 9787 |
| DLGAP5 | UNC1215      | 0.070415 | 0.134422 | 9787 |
| DLGAP5 | VNLG/124     | 0.03417  | 0.437704 | 9787 |
| DLGAP5 | VX-11e       | 0.158087 | 7.24E-05 | 9787 |
| DLGAP5 | VX-680       | -0.05023 | 0.611857 | 9787 |
| DLGAP5 | VX-702       | 0.003584 | 0.992323 | 9787 |
| DLGAP5 | Veliparib    | -0.00869 | 0.923081 | 9787 |
| DLGAP5 | Vinblastine  | -0.036   | 0.441809 | 9787 |
| DLGAP5 | Vinorelbine  | -0.031   | 0.605364 | 9787 |
| DLGAP5 | Vorinostat   | -0.09728 | 0.007952 | 9787 |
| DLGAP5 | WH-4-023     | 0.051994 | 0.523836 | 9787 |
| DLGAP5 | WZ-1-84      | 0.011711 | 0.902123 | 9787 |
| DLGAP5 | WZ3105       | -0.04264 | 0.251255 | 9787 |
| DLGAP5 | XAV939       | -0.01523 | 0.72867  | 9787 |
| DLGAP5 | XL-184       | 0.018106 | 0.738596 | 9787 |
| DLGAP5 | XMD11-85h    | 0.066062 | 0.678107 | 9787 |
| DLGAP5 | XMD13-2      | -0.01389 | 0.731959 | 9787 |
| DLGAP5 | XMD14-99     | 0.056253 | 0.145804 | 9787 |
| DLGAP5 | XMD15-27     | -0.00761 | 0.900191 | 9787 |
| DLGAP5 | XMD8-85      | 0.065711 | 0.429567 | 9787 |

|        |                    |          |          |       |
|--------|--------------------|----------|----------|-------|
| DLGAP5 | XMD8-92            | 0.008234 | 0.960252 | 9787  |
| DLGAP5 | Y-39983            | -0.05431 | 0.156568 | 9787  |
| DLGAP5 | YK 4-279           | 0.038442 | 0.494793 | 9787  |
| DLGAP5 | YM155              | -0.07993 | 0.083549 | 9787  |
| DLGAP5 | YM201636           | -0.03268 | 0.403948 | 9787  |
| DLGAP5 | Z-LLN1e-CHO        | 0.041556 | 0.610078 | 9787  |
| DLGAP5 | ZG-10              | -0.04688 | 0.503967 | 9787  |
| DLGAP5 | ZM-447439          | -0.02039 | 0.704434 | 9787  |
| DLGAP5 | ZSTK474            | -0.05567 | 0.134705 | 9787  |
| DLGAP5 | Zibotentan         | -0.00578 | 0.990687 | 9787  |
| DLGAP5 | piperlongumine     | -0.00233 | 0.97034  | 9787  |
| DLGAP5 | rTRAIL             | 0.041357 | 0.577323 | 9787  |
| DLGAP5 | selumetinib        | 0.244062 | 6.5E-13  | 9787  |
| DTL    | (5Z)-7-Oxozeaenol  | 0.093762 | 0.015169 | 51514 |
| DTL    | 17-AAG             | 0.197078 | 3.83E-08 | 51514 |
| DTL    | 5-Fluorouracil     | -0.14946 | 2.34E-05 | 51514 |
| DTL    | 681640             | 0.060187 | 0.302685 | 51514 |
| DTL    | A-443654           | -0.01628 | 0.946056 | 51514 |
| DTL    | A-770041           | 0.097435 | 0.190326 | 51514 |
| DTL    | AC220              | -0.06595 | 0.140053 | 51514 |
| DTL    | AG-014699          | 0.046191 | 0.287101 | 51514 |
| DTL    | AICAR              | -0.13041 | 0.000613 | 51514 |
| DTL    | AKT inhibitor VIII | 0.10932  | 0.008648 | 51514 |
| DTL    | AMG-706            | 0.055946 | 0.324957 | 51514 |
| DTL    | AP-24534           | -0.05542 | 0.183801 | 51514 |
| DTL    | AR-42              | -0.19399 | 2.04E-08 | 51514 |
| DTL    | AS601245           | 0.115766 | 0.009762 | 51514 |
| DTL    | AS605240           | -0.07316 | 0.075327 | 51514 |
| DTL    | AT-7519            | -0.15274 | 1.15E-05 | 51514 |
| DTL    | ATRA               | -0.09633 | 0.027265 | 51514 |
| DTL    | AUY922             | 0.064243 | 0.187692 | 51514 |
| DTL    | AZ628              | 0.043592 | 0.597532 | 51514 |
| DTL    | AZD6482            | 0.067833 | 0.115689 | 51514 |
| DTL    | AZD7762            | -0.16352 | 1.35E-05 | 51514 |
| DTL    | AZD8055            | -0.11886 | 0.001865 | 51514 |
| DTL    | Afatinib           | 0.157582 | 6.71E-06 | 51514 |
| DTL    | Axitinib           | -0.11409 | 0.01046  | 51514 |
| DTL    | BAY 61-3606        | -0.03814 | 0.376493 | 51514 |
| DTL    | BEZ235             | 0.076895 | 0.089187 | 51514 |
| DTL    | BHG712             | -0.13263 | 0.00017  | 51514 |
| DTL    | BI-2536            | -0.06778 | 0.502413 | 51514 |
| DTL    | BIRB 0796          | 0.078444 | 0.10288  | 51514 |
| DTL    | BIX02189           | -0.14474 | 4.12E-05 | 51514 |
| DTL    | BMS-509744         | 0.033817 | 0.740011 | 51514 |
| DTL    | BMS-536924         | -0.02799 | 0.719366 | 51514 |
| DTL    | BMS-708163         | 0.111828 | 0.003706 | 51514 |
| DTL    | BMS-754807         | 0.028475 | 0.632323 | 51514 |
| DTL    | BMS345541          | -0.20792 | 1.46E-09 | 51514 |
| DTL    | BX-795             | -0.10406 | 0.011845 | 51514 |
| DTL    | BX-912             | -0.22467 | 3.75E-11 | 51514 |



|     |                   |          |          |       |
|-----|-------------------|----------|----------|-------|
| DTL | Belinostat        | -0.15885 | 8.86E-06 | 51514 |
| DTL | Bexarotene        | 0.01618  | 0.869021 | 51514 |
| DTL | Bicalutamide      | 0.074633 | 0.079889 | 51514 |
| DTL | Bleomycin         | 0.07886  | 0.111798 | 51514 |
| DTL | Bleomycin (50 uM) | 0.160488 | 4.83E-06 | 51514 |
| DTL | Bortezomib        | 0.067405 | 0.395853 | 51514 |
| DTL | Bosutinib         | 0.0023   | 0.975441 | 51514 |
| DTL | Bryostatatin 1    | 0.108368 | 0.017611 | 51514 |
| DTL | CAL-101           | -0.10352 | 0.004722 | 51514 |
| DTL | CAY10603          | -0.1865  | 6.85E-08 | 51514 |
| DTL | CCT007093         | 0.1211   | 0.002459 | 51514 |
| DTL | CCT018159         | 0.020831 | 0.724506 | 51514 |
| DTL | CEP-701           | -0.13373 | 0.000469 | 51514 |
| DTL | CGP-082996        | 0.051203 | 0.611109 | 51514 |
| DTL | CGP-60474         | 0.063189 | 0.465834 | 51514 |
| DTL | CH5424802         | -0.07944 | 0.109507 | 51514 |
| DTL | CHIR-99021        | 0.083922 | 0.02488  | 51514 |
| DTL | CI-1040           | 0.106326 | 0.008446 | 51514 |
| DTL | CMK               | 0.064923 | 0.568265 | 51514 |
| DTL | CP466722          | -0.20345 | 2.99E-09 | 51514 |
| DTL | CP724714          | 0.102717 | 0.019504 | 51514 |
| DTL | CUDC-101          | -0.16479 | 3.22E-06 | 51514 |
| DTL | CX-5461           | -0.18011 | 2.63E-07 | 51514 |
| DTL | Camptothecin      | -0.10259 | 0.011315 | 51514 |
| DTL | Cetuximab         | 0.12387  | 0.001232 | 51514 |
| DTL | Cisplatin         | -0.02223 | 0.692222 | 51514 |
| DTL | Crizotinib        | -0.06148 | 0.663199 | 51514 |
| DTL | Cyclopamine       | 0.038104 | 0.757168 | 51514 |
| DTL | Cytarabine        | -0.05    | 0.321001 | 51514 |
| DTL | DMOG              | -0.06841 | 0.11522  | 51514 |
| DTL | Dabrafenib        | 0.071327 | 0.087268 | 51514 |
| DTL | Dasatinib         | 0.141711 | 0.023165 | 51514 |
| DTL | Docetaxel         | 0.155968 | 2.03E-05 | 51514 |
| DTL | Doxorubicin       | 0.026347 | 0.713747 | 51514 |
| DTL | EHT 1864          | 0.010282 | 0.91177  | 51514 |
| DTL | EKB-569           | -0.06746 | 0.089085 | 51514 |
| DTL | EX-527            | -0.00482 | 0.973856 | 51514 |
| DTL | Elesclomol        | 0.007881 | 0.884387 | 51514 |
| DTL | Embelin           | 0.034838 | 0.578809 | 51514 |
| DTL | Epothilone B      | 0.077744 | 0.102107 | 51514 |
| DTL | Erlotinib         | 0.199466 | 0.001866 | 51514 |
| DTL | Etoposide         | -0.08648 | 0.045461 | 51514 |
| DTL | FH535             | 0.110674 | 0.008609 | 51514 |
| DTL | FK866             | -0.21166 | 9.75E-10 | 51514 |
| DTL | FMK               | -0.03309 | 0.648618 | 51514 |
| DTL | FR-180204         | -0.04079 | 0.443998 | 51514 |
| DTL | FTI-277           | 0.173516 | 6.33E-06 | 51514 |
| DTL | Foretinib         | -0.11894 | 0.001575 | 51514 |
| DTL | GDC0449           | 0.036641 | 0.718442 | 51514 |
| DTL | GDC0941           | -0.02188 | 0.740598 | 51514 |

|     |                    |          |          |       |
|-----|--------------------|----------|----------|-------|
| DTL | GNF-2              | -0.05058 | 0.836716 | 51514 |
| DTL | GSK-650394         | 0.018425 | 0.840465 | 51514 |
| DTL | GSK1070916         | -0.2455  | 1.08E-12 | 51514 |
| DTL | GSK1904529A        | 0.079031 | 0.070435 | 51514 |
| DTL | GSK2126458         | -0.13073 | 0.000289 | 51514 |
| DTL | GSK269962A         | 0.014195 | 0.826372 | 51514 |
| DTL | GSK429286A         | -0.16273 | 1.04E-05 | 51514 |
| DTL | GSK690693          | -0.15961 | 5.95E-06 | 51514 |
| DTL | GW 441756          | -0.02857 | 0.897484 | 51514 |
| DTL | GW-2580            | 0.003119 | 0.9952   | 51514 |
| DTL | GW843682X          | -0.09653 | 0.233532 | 51514 |
| DTL | Gefitinib          | 0.155272 | 5.01E-05 | 51514 |
| DTL | Gemcitabine        | -0.06179 | 0.192467 | 51514 |
| DTL | Genentech Cpd 10   | -0.19765 | 1.21E-08 | 51514 |
| DTL | HG-5-113-01        | -0.07548 | 0.267324 | 51514 |
| DTL | HG-5-88-01         | 0.006589 | 0.978314 | 51514 |
| DTL | HG-6-64-1          | 0.065966 | 0.146187 | 51514 |
| DTL | I-BET-762          | -0.23    | 9.7E-12  | 51514 |
| DTL | IOX2               | 0.071026 | 0.181588 | 51514 |
| DTL | IPA-3              | -0.08015 | 0.039494 | 51514 |
| DTL | Imatinib           | -0.10572 | 0.32209  | 51514 |
| DTL | Ispinesib Mesylate | -0.13835 | 9.25E-05 | 51514 |
| DTL | JNJ-26854165       | 0.067158 | 0.157233 | 51514 |
| DTL | JNK Inhibitor VIII | 0.087429 | 0.033698 | 51514 |
| DTL | JNK-9L             | 0.026621 | 0.673749 | 51514 |
| DTL | JQ1                | -0.03064 | 0.500805 | 51514 |
| DTL | JQ12               | -0.04227 | 0.444027 | 51514 |
| DTL | JW-7-24-1          | -0.18535 | 7.61E-08 | 51514 |
| DTL | JW-7-52-1          | 0.046435 | 0.665953 | 51514 |
| DTL | KIN001-055         | 0.051473 | 0.384459 | 51514 |
| DTL | KIN001-102         | -0.20212 | 3.58E-09 | 51514 |
| DTL | KIN001-135         | 0.097386 | 0.291691 | 51514 |
| DTL | KIN001-236         | -0.09677 | 0.007897 | 51514 |
| DTL | KIN001-244         | -0.15503 | 1.16E-05 | 51514 |
| DTL | KIN001-260         | -0.13629 | 0.000115 | 51514 |
| DTL | KIN001-266         | -0.04716 | 0.324335 | 51514 |
| DTL | KIN001-270         | -0.1115  | 0.002935 | 51514 |
| DTL | KU-55933           | -0.04393 | 0.471624 | 51514 |
| DTL | LAQ824             | -0.12501 | 0.000918 | 51514 |
| DTL | LFM-A13            | 0.081712 | 0.081776 | 51514 |
| DTL | LY317615           | -0.09324 | 0.021855 | 51514 |
| DTL | Lapatinib          | 0.225346 | 8.61E-05 | 51514 |
| DTL | Lenalidomide       | -0.04979 | 0.482004 | 51514 |
| DTL | Linifanib          | -0.03676 | 0.498638 | 51514 |
| DTL | Lisitinib          | 0.001819 | 0.984226 | 51514 |
| DTL | MG-132             | 0.074183 | 0.38763  | 51514 |
| DTL | MK-2206            | -0.08343 | 0.079779 | 51514 |
| DTL | MLN4924            | 0.045722 | 0.427271 | 51514 |
| DTL | MP470              | -0.07091 | 0.093657 | 51514 |
| DTL | MPS-1-IN-1         | -0.14949 | 3.18E-05 | 51514 |

|     |                     |          |          |       |
|-----|---------------------|----------|----------|-------|
| DTL | MS-275              | -0.20084 | 0.00345  | 51514 |
| DTL | Masitinib           | -0.15707 | 1.08E-05 | 51514 |
| DTL | Methotrexate        | -0.19194 | 7.55E-08 | 51514 |
| DTL | Midostaurin         | 0.061037 | 0.163248 | 51514 |
| DTL | Mitomycin C         | -0.0717  | 0.13037  | 51514 |
| DTL | NG-25               | -0.15834 | 5.37E-06 | 51514 |
| DTL | NPK76-II-72-1       | -0.27238 | 3.57E-16 | 51514 |
| DTL | NSC-207895          | -0.13464 | 0.000657 | 51514 |
| DTL | NSC-87877           | 0.10537  | 0.036244 | 51514 |
| DTL | NU-7441             | 0.004867 | 0.966103 | 51514 |
| DTL | Navitoclax          | -0.2824  | 7.16E-16 | 51514 |
| DTL | Nilotinib           | -0.10415 | 0.018672 | 51514 |
| DTL | Nutlin-3a (-)       | 0.01002  | 0.869039 | 51514 |
| DTL | OSI-027             | -0.15872 | 5.97E-06 | 51514 |
| DTL | OSI-930             | -0.0897  | 0.017673 | 51514 |
| DTL | OSU-03012           | 0.013254 | 0.825452 | 51514 |
| DTL | Obatoclax Mesylate  | 0.024987 | 0.636641 | 51514 |
| DTL | Olaparib            | 0.028575 | 0.541873 | 51514 |
| DTL | PAC-1               | -0.10116 | 0.010987 | 51514 |
| DTL | PD-0325901          | 0.177511 | 1.87E-06 | 51514 |
| DTL | PD-0332991          | -0.00057 | 0.994269 | 51514 |
| DTL | PD-173074           | -0.03714 | 0.813209 | 51514 |
| DTL | PF-4708671          | 0.061687 | 0.487255 | 51514 |
| DTL | PF-562271           | 0.038307 | 0.508735 | 51514 |
| DTL | PFI-1               | 0.012109 | 0.838655 | 51514 |
| DTL | PHA-665752          | 0.098201 | 0.44294  | 51514 |
| DTL | PHA-793887          | -0.18608 | 5.24E-08 | 51514 |
| DTL | PI-103              | -0.16799 | 1.55E-06 | 51514 |
| DTL | PIK-93              | -0.21702 | 1.71E-10 | 51514 |
| DTL | PLX4720             | 0.068096 | 0.092723 | 51514 |
| DTL | Paclitaxel          | 0.048813 | 0.676653 | 51514 |
| DTL | Parthenolide        | -0.02019 | 0.87487  | 51514 |
| DTL | Pazopanib           | 0.043076 | 0.440288 | 51514 |
| DTL | Phenformin          | -0.09454 | 0.009943 | 51514 |
| DTL | Pyrimethamine       | -0.06866 | 0.546819 | 51514 |
| DTL | QL-VIII-58          | 0.067718 | 0.358678 | 51514 |
| DTL | QL-X-138            | -0.17332 | 7.9E-07  | 51514 |
| DTL | QL-XI-92            | -0.18938 | 4.64E-08 | 51514 |
| DTL | QL-XII-47           | -0.12113 | 0.001278 | 51514 |
| DTL | QL-XII-61           | -0.14373 | 0.012691 | 51514 |
| DTL | QS11                | -0.03664 | 0.572962 | 51514 |
| DTL | RDEA119             | 0.193809 | 1.65E-08 | 51514 |
| DTL | RO-3306             | 0.109142 | 0.006933 | 51514 |
| DTL | Rapamycin           | 0.021687 | 0.892295 | 51514 |
| DTL | Roscovitine         | 0.075751 | 0.626279 | 51514 |
| DTL | Ruxolitinib         | -0.08314 | 0.063864 | 51514 |
| DTL | S-Trityl-L-cysteine | -0.05741 | 0.498012 | 51514 |
| DTL | SB 216763           | 0.099703 | 0.032215 | 51514 |
| DTL | SB 505124           | 0.049037 | 0.490986 | 51514 |
| DTL | SB52334             | -0.04096 | 0.402428 | 51514 |

|     |              |          |          |       |
|-----|--------------|----------|----------|-------|
| DTL | SB590885     | 0.097566 | 0.029078 | 51514 |
| DTL | SGC0946      | 0.067389 | 0.163671 | 51514 |
| DTL | SL 0101-1    | 0.070573 | 0.331565 | 51514 |
| DTL | SN-38        | -0.00848 | 0.879381 | 51514 |
| DTL | SNX-2112     | -0.15784 | 6.93E-06 | 51514 |
| DTL | STF-62247    | -0.071   | 0.073751 | 51514 |
| DTL | Salubrinal   | 0.003723 | 0.973502 | 51514 |
| DTL | Saracatinib  | 0.046452 | 0.600989 | 51514 |
| DTL | Shikonin     | -0.02622 | 0.657289 | 51514 |
| DTL | Sorafenib    | 0.008699 | 0.952661 | 51514 |
| DTL | Sunitinib    | -0.05351 | 0.500827 | 51514 |
| DTL | T0901317     | -0.07672 | 0.053642 | 51514 |
| DTL | TAE684       | -0.00756 | 0.964524 | 51514 |
| DTL | TAK-715      | -0.13594 | 0.000118 | 51514 |
| DTL | TG101348     | -0.21874 | 1.47E-10 | 51514 |
| DTL | TGX221       | 0.22076  | 0.000136 | 51514 |
| DTL | THZ-2-102-1  | -0.20404 | 3.93E-09 | 51514 |
| DTL | THZ-2-49     | -0.10666 | 0.003264 | 51514 |
| DTL | TL-1-85      | -0.1665  | 1.72E-06 | 51514 |
| DTL | TL-2-105     | -0.16606 | 2.75E-06 | 51514 |
| DTL | TPCA-1       | -0.21545 | 2.39E-10 | 51514 |
| DTL | TW 37        | -0.05717 | 0.203837 | 51514 |
| DTL | Talazoparib  | -0.02494 | 0.616798 | 51514 |
| DTL | Tamoxifen    | 0.079596 | 0.373983 | 51514 |
| DTL | Temozolomide | -0.02497 | 0.756783 | 51514 |
| DTL | Temsirolimus | -0.00893 | 0.883814 | 51514 |
| DTL | Thapsigargin | 0.027755 | 0.706389 | 51514 |
| DTL | Tipifarnib   | 0.042079 | 0.527988 | 51514 |
| DTL | Tivozanib    | -0.07622 | 0.122854 | 51514 |
| DTL | Trametinib   | 0.248389 | 7.11E-13 | 51514 |
| DTL | Tubastatin A | -0.16802 | 1.26E-06 | 51514 |
| DTL | UNCO638      | -0.16404 | 1.4E-06  | 51514 |
| DTL | UNC1215      | 0.092738 | 0.040481 | 51514 |
| DTL | VNLG/124     | -0.08666 | 0.02772  | 51514 |
| DTL | VX-11e       | 0.023785 | 0.661171 | 51514 |
| DTL | VX-680       | -0.08633 | 0.328221 | 51514 |
| DTL | VX-702       | -0.00289 | 0.9952   | 51514 |
| DTL | Veliparib    | 0.039366 | 0.573815 | 51514 |
| DTL | Vinblastine  | -0.05392 | 0.223144 | 51514 |
| DTL | Vinorelbine  | -0.01429 | 0.831698 | 51514 |
| DTL | Vorinostat   | -0.26513 | 4.29E-14 | 51514 |
| DTL | WH-4-023     | 0.137073 | 0.04475  | 51514 |
| DTL | WZ-1-84      | 0.166228 | 0.012851 | 51514 |
| DTL | WZ3105       | -0.1843  | 8.58E-08 | 51514 |
| DTL | XAV939       | 0.113927 | 0.002467 | 51514 |
| DTL | XL-184       | -0.03111 | 0.532842 | 51514 |
| DTL | XMD11-85h    | 0.023537 | 0.908531 | 51514 |
| DTL | XMD13-2      | -0.17432 | 4.86E-07 | 51514 |
| DTL | XMD14-99     | -0.11718 | 0.001351 | 51514 |
| DTL | XMD15-27     | -0.09306 | 0.028796 | 51514 |

|      |                    |          |          |       |
|------|--------------------|----------|----------|-------|
| DTL  | XMD8-85            | 0.040025 | 0.659052 | 51514 |
| DTL  | XMD8-92            | 0.007537 | 0.962116 | 51514 |
| DTL  | Y-39983            | -0.17374 | 8.83E-07 | 51514 |
| DTL  | YK 4-279           | 0.032014 | 0.582853 | 51514 |
| DTL  | YM155              | -0.06666 | 0.163841 | 51514 |
| DTL  | YM201636           | -0.158   | 7.28E-06 | 51514 |
| DTL  | Z-LLN1e-CHO        | 0.05846  | 0.445875 | 51514 |
| DTL  | ZG-10              | -0.10557 | 0.082397 | 51514 |
| DTL  | ZM-447439          | -0.14129 | 0.000501 | 51514 |
| DTL  | ZSTK474            | -0.15607 | 8.84E-06 | 51514 |
| DTL  | Zibotentan         | 0.009162 | 0.987393 | 51514 |
| DTL  | piperlongumine     | 0.071671 | 0.085383 | 51514 |
| DTL  | rTRAIL             | 0.051728 | 0.464466 | 51514 |
| DTL  | selumetinib        | 0.203363 | 3.17E-09 | 51514 |
| ECT2 | (5Z)-7-Oxozeaenol  | 0.219755 | 6.43E-10 | 1894  |
| ECT2 | 17-AAG             | -0.09737 | 0.008615 | 1894  |
| ECT2 | 5-Fluorouracil     | 0.22082  | 1.77E-10 | 1894  |
| ECT2 | 681640             | -0.00855 | 0.909212 | 1894  |
| ECT2 | A-443654           | -0.1024  | 0.463042 | 1894  |
| ECT2 | A-770041           | -0.02297 | 0.81439  | 1894  |
| ECT2 | AC220              | 0.153969 | 7.61E-05 | 1894  |
| ECT2 | AG-014699          | 0.01445  | 0.770041 | 1894  |
| ECT2 | AICAR              | 0.160355 | 2.05E-05 | 1894  |
| ECT2 | AKT inhibitor VIII | -0.0847  | 0.047524 | 1894  |
| ECT2 | AMG-706            | 0.014989 | 0.840712 | 1894  |
| ECT2 | AP-24534           | 0.209265 | 1.07E-08 | 1894  |
| ECT2 | AR-42              | 0.194465 | 1.88E-08 | 1894  |
| ECT2 | AS601245           | -0.01184 | 0.86543  | 1894  |
| ECT2 | AS605240           | 0.164713 | 1.29E-05 | 1894  |
| ECT2 | AT-7519            | 0.148781 | 1.98E-05 | 1894  |
| ECT2 | ATRA               | 0.170785 | 1.89E-05 | 1894  |
| ECT2 | AUY922             | 0.086134 | 0.061751 | 1894  |
| ECT2 | AZ628              | 0.203191 | 0.001051 | 1894  |
| ECT2 | AZD6482            | 0.062324 | 0.155413 | 1894  |
| ECT2 | AZD7762            | 0.145447 | 0.000122 | 1894  |
| ECT2 | AZD8055            | 0.211498 | 9.99E-09 | 1894  |
| ECT2 | Afatinib           | -0.14394 | 4.41E-05 | 1894  |
| ECT2 | Axitinib           | 0.115026 | 0.009797 | 1894  |
| ECT2 | BAY 61-3606        | 0.174607 | 3.51E-06 | 1894  |
| ECT2 | BEZ235             | 0.086483 | 0.051417 | 1894  |
| ECT2 | BHG712             | 0.268178 | 0        | 1894  |
| ECT2 | BI-2536            | -0.11762 | 0.188984 | 1894  |
| ECT2 | BIRB 0796          | -0.05842 | 0.243668 | 1894  |
| ECT2 | BIX02189           | 0.219769 | 1.82E-10 | 1894  |
| ECT2 | BMS-509744         | -0.03841 | 0.699646 | 1894  |
| ECT2 | BMS-536924         | 0.092071 | 0.07674  | 1894  |
| ECT2 | BMS-708163         | -0.04844 | 0.236708 | 1894  |
| ECT2 | BMS-754807         | -0.00983 | 0.88541  | 1894  |
| ECT2 | BMS345541          | 0.144009 | 3.88E-05 | 1894  |
| ECT2 | BX-795             | 0.148218 | 0.000185 | 1894  |

|      |                   |          |          |      |
|------|-------------------|----------|----------|------|
| ECT2 | BX-912            | 0.198156 | 6.88E-09 | 1894 |
| ECT2 | Belinostat        | 0.173378 | 1.1E-06  | 1894 |
| ECT2 | Bexarotene        | 0.019544 | 0.833021 | 1894 |
| ECT2 | Bicalutamide      | -0.09547 | 0.021107 | 1894 |
| ECT2 | Bleomycin         | 0.008919 | 0.90305  | 1894 |
| ECT2 | Bleomycin (50 uM) | -0.00486 | 0.907148 | 1894 |
| ECT2 | Bortezomib        | 0.010075 | 0.92567  | 1894 |
| ECT2 | Bosutinib         | 0.016185 | 0.805689 | 1894 |
| ECT2 | Bryostatins 1     | 0.001438 | 0.984796 | 1894 |
| ECT2 | CAL-101           | 0.156355 | 1.17E-05 | 1894 |
| ECT2 | CAY10603          | 0.217811 | 2.14E-10 | 1894 |
| ECT2 | CCT007093         | -0.01095 | 0.835355 | 1894 |
| ECT2 | CCT018159         | 0.050011 | 0.3245   | 1894 |
| ECT2 | CEP-701           | 0.221749 | 1.62E-09 | 1894 |
| ECT2 | CGP-082996        | -0.01416 | 0.91241  | 1894 |
| ECT2 | CGP-60474         | 0.006107 | 0.959002 | 1894 |
| ECT2 | CH5424802         | 0.08333  | 0.089574 | 1894 |
| ECT2 | CHIR-99021        | 0.008223 | 0.856842 | 1894 |
| ECT2 | CI-1040           | 0.124302 | 0.00174  | 1894 |
| ECT2 | CMK               | 0.031797 | 0.815658 | 1894 |
| ECT2 | CP466722          | 0.178943 | 2.21E-07 | 1894 |
| ECT2 | CP724714          | -0.05838 | 0.251405 | 1894 |
| ECT2 | CUDC-101          | 0.148412 | 3.06E-05 | 1894 |
| ECT2 | CX-5461           | 0.159247 | 6.17E-06 | 1894 |
| ECT2 | Camptothecin      | 0.118565 | 0.002911 | 1894 |
| ECT2 | Cetuximab         | -0.11987 | 0.001818 | 1894 |
| ECT2 | Cisplatin         | 0.012185 | 0.842433 | 1894 |
| ECT2 | Crizotinib        | 0.011865 | 0.957854 | 1894 |
| ECT2 | Cyclopamine       | 0.059161 | 0.584163 | 1894 |
| ECT2 | Cytarabine        | 0.043506 | 0.399148 | 1894 |
| ECT2 | DMOG              | 0.139412 | 0.000395 | 1894 |
| ECT2 | Dabrafenib        | 0.188182 | 4.1E-07  | 1894 |
| ECT2 | Dasatinib         | -0.0218  | 0.776888 | 1894 |
| ECT2 | Docetaxel         | -0.10974 | 0.003071 | 1894 |
| ECT2 | Doxorubicin       | 0.02112  | 0.779822 | 1894 |
| ECT2 | EHT 1864          | 0.041211 | 0.535713 | 1894 |
| ECT2 | EKB-569           | 0.063905 | 0.109305 | 1894 |
| ECT2 | EX-527            | 0.008344 | 0.954278 | 1894 |
| ECT2 | Elesclomol        | -0.06491 | 0.136772 | 1894 |
| ECT2 | Embelin           | -0.0177  | 0.808359 | 1894 |
| ECT2 | Epothilone B      | -0.05607 | 0.261771 | 1894 |
| ECT2 | Erlotinib         | -0.15056 | 0.024856 | 1894 |
| ECT2 | Etoposide         | 0.022372 | 0.683826 | 1894 |
| ECT2 | FH535             | -0.04113 | 0.407429 | 1894 |
| ECT2 | FK866             | 0.144478 | 4.27E-05 | 1894 |
| ECT2 | FMK               | 0.083653 | 0.142202 | 1894 |
| ECT2 | FR-180204         | 0.092316 | 0.041263 | 1894 |
| ECT2 | FTI-277           | 0.010537 | 0.826404 | 1894 |
| ECT2 | Foretinib         | 0.133207 | 0.000344 | 1894 |
| ECT2 | GDC0449           | 0.096381 | 0.179347 | 1894 |

|      |                    |          |          |      |
|------|--------------------|----------|----------|------|
| ECT2 | GDC0941            | 0.020241 | 0.761408 | 1894 |
| ECT2 | GNF-2              | 0.009355 | 0.981259 | 1894 |
| ECT2 | GSK-650394         | -0.00517 | 0.959368 | 1894 |
| ECT2 | GSK1070916         | 0.13984  | 8.7E-05  | 1894 |
| ECT2 | GSK1904529A        | -0.0978  | 0.022164 | 1894 |
| ECT2 | GSK2126458         | 0.132963 | 0.000224 | 1894 |
| ECT2 | GSK269962A         | 0.082993 | 0.061624 | 1894 |
| ECT2 | GSK429286A         | 0.096739 | 0.012696 | 1894 |
| ECT2 | GSK690693          | 0.0653   | 0.080724 | 1894 |
| ECT2 | GW 441756          | -0.01854 | 0.947563 | 1894 |
| ECT2 | GW-2580            | -0.00246 | 0.99615  | 1894 |
| ECT2 | GW843682X          | -0.06104 | 0.498631 | 1894 |
| ECT2 | Gefitinib          | -0.09143 | 0.022661 | 1894 |
| ECT2 | Gemcitabine        | 0.032775 | 0.536799 | 1894 |
| ECT2 | Genentech Cpd 10   | 0.168574 | 1.46E-06 | 1894 |
| ECT2 | HG-5-113-01        | 0.079335 | 0.238513 | 1894 |
| ECT2 | HG-5-88-01         | 0.140666 | 0.094072 | 1894 |
| ECT2 | HG-6-64-1          | 0.164788 | 2.87E-05 | 1894 |
| ECT2 | I-BET-762          | 0.278267 | 0        | 1894 |
| ECT2 | IOX2               | -0.08576 | 0.096183 | 1894 |
| ECT2 | IPA-3              | 0.139982 | 0.000181 | 1894 |
| ECT2 | Imatinib           | 0.076038 | 0.564146 | 1894 |
| ECT2 | Ispinesib Mesylate | 0.158384 | 6.5E-06  | 1894 |
| ECT2 | JNJ-26854165       | 0.080554 | 0.078335 | 1894 |
| ECT2 | JNK Inhibitor VIII | -0.11331 | 0.004876 | 1894 |
| ECT2 | JNK-9L             | 0.097324 | 0.03982  | 1894 |
| ECT2 | JQ1                | 0.148824 | 0.000104 | 1894 |
| ECT2 | JQ12               | 0.124677 | 0.006894 | 1894 |
| ECT2 | JW-7-24-1          | 0.228071 | 2.2E-11  | 1894 |
| ECT2 | JW-7-52-1          | 0.012196 | 0.927705 | 1894 |
| ECT2 | KIN001-055         | -0.00433 | 0.963928 | 1894 |
| ECT2 | KIN001-102         | 0.139621 | 6.09E-05 | 1894 |
| ECT2 | KIN001-135         | 0.006068 | 0.969935 | 1894 |
| ECT2 | KIN001-236         | 0.191152 | 4.66E-08 | 1894 |
| ECT2 | KIN001-244         | 0.179379 | 3.24E-07 | 1894 |
| ECT2 | KIN001-260         | 0.22713  | 3.88E-11 | 1894 |
| ECT2 | KIN001-266         | 0.068316 | 0.132599 | 1894 |
| ECT2 | KIN001-270         | 0.092694 | 0.014875 | 1894 |
| ECT2 | KU-55933           | 0.036897 | 0.567908 | 1894 |
| ECT2 | LAQ824             | 0.104824 | 0.006066 | 1894 |
| ECT2 | LFM-A13            | -0.06038 | 0.214863 | 1894 |
| ECT2 | LY317615           | 0.052622 | 0.228256 | 1894 |
| ECT2 | Lapatinib          | -0.16772 | 0.004827 | 1894 |
| ECT2 | Lenalidomide       | 0.059899 | 0.367232 | 1894 |
| ECT2 | Linifanib          | 0.17058  | 7.42E-06 | 1894 |
| ECT2 | Lisitininb         | 0.022948 | 0.75884  | 1894 |
| ECT2 | MG-132             | 0.020461 | 0.860563 | 1894 |
| ECT2 | MK-2206            | -0.00052 | 0.993949 | 1894 |
| ECT2 | MLN4924            | 0.038281 | 0.519633 | 1894 |
| ECT2 | MP470              | 0.037643 | 0.402661 | 1894 |

|      |                     |          |          |      |
|------|---------------------|----------|----------|------|
| ECT2 | MPS-1-IN-1          | 0.16513  | 3.8E-06  | 1894 |
| ECT2 | MS-275              | 0.01357  | 0.899269 | 1894 |
| ECT2 | Masitinib           | 0.236449 | 1E-11    | 1894 |
| ECT2 | Methotrexate        | 0.259532 | 1.47E-13 | 1894 |
| ECT2 | Midostaurin         | 0.037131 | 0.428516 | 1894 |
| ECT2 | Mitomycin C         | 0.032214 | 0.560353 | 1894 |
| ECT2 | NG-25               | 0.249289 | 2.13E-13 | 1894 |
| ECT2 | NPK76-II-72-1       | 0.142116 | 3.88E-05 | 1894 |
| ECT2 | NSC-207895          | -0.0157  | 0.769167 | 1894 |
| ECT2 | NSC-87877           | -0.01094 | 0.8788   | 1894 |
| ECT2 | NU-7441             | 0.039525 | 0.594298 | 1894 |
| ECT2 | Navitoclax          | 0.111979 | 0.002339 | 1894 |
| ECT2 | Nilotinib           | 0.145754 | 0.000539 | 1894 |
| ECT2 | Nutlin-3a (-)       | 0.268497 | 1.26E-12 | 1894 |
| ECT2 | OSI-027             | 0.194971 | 1.92E-08 | 1894 |
| ECT2 | OSI-930             | 0.197459 | 3.15E-08 | 1894 |
| ECT2 | OSU-03012           | 0.02888  | 0.594643 | 1894 |
| ECT2 | Obatoclax Mesylate  | 0.11799  | 0.004458 | 1894 |
| ECT2 | Olaparib            | 0.025108 | 0.597601 | 1894 |
| ECT2 | PAC-1               | 0.084705 | 0.036559 | 1894 |
| ECT2 | PD-0325901          | 0.038459 | 0.362869 | 1894 |
| ECT2 | PD-0332991          | 0.136566 | 0.002084 | 1894 |
| ECT2 | PD-173074           | 0.013735 | 0.947772 | 1894 |
| ECT2 | PF-4708671          | 0.026635 | 0.820759 | 1894 |
| ECT2 | PF-562271           | 0.010241 | 0.885379 | 1894 |
| ECT2 | PFI-1               | 0.166369 | 3.07E-05 | 1894 |
| ECT2 | PHA-665752          | -0.04207 | 0.789013 | 1894 |
| ECT2 | PHA-793887          | 0.206823 | 1.2E-09  | 1894 |
| ECT2 | PI-103              | 0.18058  | 2.18E-07 | 1894 |
| ECT2 | PIK-93              | 0.198666 | 6.02E-09 | 1894 |
| ECT2 | PLX4720             | 0.150502 | 4E-05    | 1894 |
| ECT2 | Paclitaxel          | -0.07729 | 0.446745 | 1894 |
| ECT2 | Parthenolide        | 0.065222 | 0.522311 | 1894 |
| ECT2 | Pazopanib           | 0.05024  | 0.355072 | 1894 |
| ECT2 | Phenformin          | 0.15165  | 2.31E-05 | 1894 |
| ECT2 | Pyrimethamine       | 0.048852 | 0.682893 | 1894 |
| ECT2 | QL-VIII-58          | 0.107126 | 0.102625 | 1894 |
| ECT2 | QL-X-138            | 0.155375 | 1.08E-05 | 1894 |
| ECT2 | QL-XI-92            | 0.228723 | 2.46E-11 | 1894 |
| ECT2 | QL-XII-47           | 0.099202 | 0.009524 | 1894 |
| ECT2 | QL-XII-61           | 0.119892 | 0.043293 | 1894 |
| ECT2 | QS11                | 0.00865  | 0.919944 | 1894 |
| ECT2 | RDEA119             | 0.104413 | 0.003526 | 1894 |
| ECT2 | RO-3306             | -0.06698 | 0.109462 | 1894 |
| ECT2 | Rapamycin           | -0.02669 | 0.860409 | 1894 |
| ECT2 | Roscovitine         | 0.052544 | 0.761323 | 1894 |
| ECT2 | Ruxolitinib         | 0.125503 | 0.002435 | 1894 |
| ECT2 | S-Trityl-L-cysteine | 0.069068 | 0.394309 | 1894 |
| ECT2 | SB 216763           | -0.03441 | 0.510594 | 1894 |
| ECT2 | SB 505124           | -0.01293 | 0.900594 | 1894 |



|      |              |          |          |      |
|------|--------------|----------|----------|------|
| ECT2 | SB52334      | 0.053567 | 0.246232 | 1894 |
| ECT2 | SB590885     | 0.13062  | 0.001934 | 1894 |
| ECT2 | SGC0946      | -0.06699 | 0.167316 | 1894 |
| ECT2 | SL 0101-1    | 0.015997 | 0.861724 | 1894 |
| ECT2 | SN-38        | 0.106847 | 0.006733 | 1894 |
| ECT2 | SNX-2112     | 0.223814 | 7.71E-11 | 1894 |
| ECT2 | STF-62247    | 0.127631 | 0.000811 | 1894 |
| ECT2 | Salubrinal   | 0.115763 | 0.13497  | 1894 |
| ECT2 | Saracatinib  | -0.07468 | 0.363589 | 1894 |
| ECT2 | Shikonin     | 0.108269 | 0.017413 | 1894 |
| ECT2 | Sorafenib    | 0.134619 | 0.09984  | 1894 |
| ECT2 | Sunitinib    | 0.178982 | 0.004416 | 1894 |
| ECT2 | T0901317     | 0.09622  | 0.013452 | 1894 |
| ECT2 | TAE684       | -0.03037 | 0.823305 | 1894 |
| ECT2 | TAK-715      | 0.138949 | 8.21E-05 | 1894 |
| ECT2 | TG101348     | 0.251296 | 1.16E-13 | 1894 |
| ECT2 | TGX221       | 0.024124 | 0.738761 | 1894 |
| ECT2 | THZ-2-102-1  | 0.185185 | 1.07E-07 | 1894 |
| ECT2 | THZ-2-49     | 0.17675  | 5.75E-07 | 1894 |
| ECT2 | TL-1-85      | 0.271192 | 0        | 1894 |
| ECT2 | TL-2-105     | 0.14135  | 7.77E-05 | 1894 |
| ECT2 | TPCA-1       | 0.238154 | 1.91E-12 | 1894 |
| ECT2 | TW 37        | 0.005393 | 0.930187 | 1894 |
| ECT2 | Talazoparib  | 0.083706 | 0.046444 | 1894 |
| ECT2 | Tamoxifen    | 0.031851 | 0.799583 | 1894 |
| ECT2 | Temozolomide | 0.087587 | 0.100606 | 1894 |
| ECT2 | Temsirolimus | 0.085419 | 0.053608 | 1894 |
| ECT2 | Thapsigargin | 0.006139 | 0.947463 | 1894 |
| ECT2 | Tipifarnib   | 0.050803 | 0.420147 | 1894 |
| ECT2 | Tivozanib    | 0.113938 | 0.01082  | 1894 |
| ECT2 | Trametinib   | 0.053629 | 0.162619 | 1894 |
| ECT2 | Tubastatin A | 0.21598  | 2.74E-10 | 1894 |
| ECT2 | UNC0638      | 0.224817 | 1.68E-11 | 1894 |
| ECT2 | UNC1215      | -0.01699 | 0.777499 | 1894 |
| ECT2 | VNLG/124     | 0.194551 | 7.41E-08 | 1894 |
| ECT2 | VX-11e       | 0.148879 | 0.000205 | 1894 |
| ECT2 | VX-680       | 0.033689 | 0.754921 | 1894 |
| ECT2 | VX-702       | 0.065429 | 0.676357 | 1894 |
| ECT2 | Veliparib    | -0.0315  | 0.66381  | 1894 |
| ECT2 | Vinblastine  | 0.137589 | 0.000521 | 1894 |
| ECT2 | Vinorelbine  | 0.004912 | 0.948229 | 1894 |
| ECT2 | Vorinostat   | 0.190572 | 9.31E-08 | 1894 |
| ECT2 | WH-4-023     | 0.012254 | 0.898925 | 1894 |
| ECT2 | WZ-1-84      | -0.0507  | 0.534005 | 1894 |
| ECT2 | WZ3105       | 0.138107 | 7.55E-05 | 1894 |
| ECT2 | XAV939       | -0.15862 | 1.61E-05 | 1894 |
| ECT2 | XL-184       | 0.158108 | 4.31E-05 | 1894 |
| ECT2 | XMD11-85h    | 0.139508 | 0.165752 | 1894 |
| ECT2 | XMD13-2      | 0.196936 | 1.05E-08 | 1894 |
| ECT2 | XMD14-99     | 0.224809 | 1.38E-10 | 1894 |

|        |                    |          |          |       |
|--------|--------------------|----------|----------|-------|
| ECT2   | XMD15-27           | 0.105937 | 0.011007 | 1894  |
| ECT2   | XMD8-85            | 0.178653 | 0.007419 | 1894  |
| ECT2   | XMD8-92            | 0.103054 | 0.238756 | 1894  |
| ECT2   | Y-39983            | 0.133052 | 0.00021  | 1894  |
| ECT2   | YK 4-279           | 0.117811 | 0.009742 | 1894  |
| ECT2   | YM155              | 0.02435  | 0.683089 | 1894  |
| ECT2   | YM201636           | 0.132466 | 0.000196 | 1894  |
| ECT2   | Z-LLN1e-CHO        | 0.103144 | 0.135939 | 1894  |
| ECT2   | ZG-10              | 0.091072 | 0.144351 | 1894  |
| ECT2   | ZM-447439          | 0.114253 | 0.005954 | 1894  |
| ECT2   | ZSTK474            | 0.144696 | 4.05E-05 | 1894  |
| ECT2   | Zibotentan         | 0.00069  | 0.998902 | 1894  |
| ECT2   | piperlongumine     | 0.064468 | 0.127814 | 1894  |
| ECT2   | rTRAIL             | 0.074347 | 0.241281 | 1894  |
| ECT2   | selumetinib        | 0.111759 | 0.00179  | 1894  |
| ERCC6L | (5Z)-7-Oxozeaenol  | 0.070741 | 0.07714  | 54821 |
| ERCC6L | 17-AAG             | 0.06057  | 0.111153 | 54821 |
| ERCC6L | 5-Fluorouracil     | 0.037098 | 0.334177 | 54821 |
| ERCC6L | 681640             | 0.013466 | 0.852839 | 54821 |
| ERCC6L | A-443654           | -0.07468 | 0.63116  | 54821 |
| ERCC6L | A-770041           | -0.10434 | 0.154285 | 54821 |
| ERCC6L | AC220              | 0.049827 | 0.289748 | 54821 |
| ERCC6L | AG-014699          | 0.054693 | 0.199456 | 54821 |
| ERCC6L | AICAR              | -0.05031 | 0.219335 | 54821 |
| ERCC6L | AKT inhibitor VIII | 0.039413 | 0.404167 | 54821 |
| ERCC6L | AMG-706            | 0.013177 | 0.864588 | 54821 |
| ERCC6L | AP-24534           | -0.0292  | 0.514445 | 54821 |
| ERCC6L | AR-42              | -0.05537 | 0.132301 | 54821 |
| ERCC6L | AS601245           | 0.030845 | 0.598953 | 54821 |
| ERCC6L | AS605240           | 0.024809 | 0.604982 | 54821 |
| ERCC6L | AT-7519            | -0.05937 | 0.104163 | 54821 |
| ERCC6L | ATRA               | 0.011204 | 0.856018 | 54821 |
| ERCC6L | AUY922             | 0.008463 | 0.904008 | 54821 |
| ERCC6L | AZ628              | 0.125954 | 0.061309 | 54821 |
| ERCC6L | AZD6482            | -0.01888 | 0.738891 | 54821 |
| ERCC6L | AZD7762            | -0.14083 | 0.000206 | 54821 |
| ERCC6L | AZD8055            | -0.06211 | 0.120239 | 54821 |
| ERCC6L | Afatinib           | 0.08064  | 0.028102 | 54821 |
| ERCC6L | Axitinib           | -0.07252 | 0.131942 | 54821 |
| ERCC6L | BAY 61-3606        | 0.027398 | 0.536511 | 54821 |
| ERCC6L | BEZ235             | -0.04377 | 0.37951  | 54821 |
| ERCC6L | BHG712             | -0.03174 | 0.411336 | 54821 |
| ERCC6L | BI-2536            | -0.15604 | 0.070866 | 54821 |
| ERCC6L | BIRB 0796          | 0.005805 | 0.926402 | 54821 |
| ERCC6L | BIX02189           | -0.03423 | 0.376374 | 54821 |
| ERCC6L | BMS-509744         | -0.04244 | 0.666837 | 54821 |
| ERCC6L | BMS-536924         | 0.034708 | 0.635814 | 54821 |
| ERCC6L | BMS-708163         | 0.073156 | 0.064514 | 54821 |
| ERCC6L | BMS-754807         | 0.080074 | 0.106067 | 54821 |
| ERCC6L | BMS345541          | -0.0921  | 0.010099 | 54821 |

|        |                   |          |          |       |
|--------|-------------------|----------|----------|-------|
| ERCC6L | BX-795            | -0.04828 | 0.296251 | 54821 |
| ERCC6L | BX-912            | -0.05471 | 0.1339   | 54821 |
| ERCC6L | Belinostat        | -0.0449  | 0.244607 | 54821 |
| ERCC6L | Bexarotene        | 0.013391 | 0.893731 | 54821 |
| ERCC6L | Bicalutamide      | 0.007235 | 0.898962 | 54821 |
| ERCC6L | Bleomycin         | 0.042318 | 0.454629 | 54821 |
| ERCC6L | Bleomycin (50 uM) | 0.018973 | 0.632294 | 54821 |
| ERCC6L | Bortezomib        | -0.05826 | 0.477036 | 54821 |
| ERCC6L | Bosutinib         | -0.07019 | 0.145788 | 54821 |
| ERCC6L | Bryostatins 1     | 0.029141 | 0.608345 | 54821 |
| ERCC6L | CAL-101           | -0.04619 | 0.237544 | 54821 |
| ERCC6L | CAY10603          | -0.06909 | 0.056962 | 54821 |
| ERCC6L | CCT007093         | 0.066594 | 0.116098 | 54821 |
| ERCC6L | CCT018159         | -0.02741 | 0.626807 | 54821 |
| ERCC6L | CEP-701           | -0.07695 | 0.054698 | 54821 |
| ERCC6L | CGP-082996        | -0.0524  | 0.601966 | 54821 |
| ERCC6L | CGP-60474         | -0.09342 | 0.23123  | 54821 |
| ERCC6L | CH5424802         | -0.01814 | 0.802776 | 54821 |
| ERCC6L | CHIR-99021        | 0.002512 | 0.958086 | 54821 |
| ERCC6L | CI-1040           | 0.101344 | 0.012545 | 54821 |
| ERCC6L | CMK               | -0.05178 | 0.671908 | 54821 |
| ERCC6L | CP466722          | -0.08073 | 0.024866 | 54821 |
| ERCC6L | CP724714          | 0.060856 | 0.226777 | 54821 |
| ERCC6L | CUDC-101          | -0.05293 | 0.161121 | 54821 |
| ERCC6L | CX-5461           | -0.05405 | 0.151341 | 54821 |
| ERCC6L | Camptothecin      | -0.08288 | 0.046751 | 54821 |
| ERCC6L | Cetuximab         | 0.076778 | 0.054997 | 54821 |
| ERCC6L | Cisplatin         | -0.03661 | 0.479035 | 54821 |
| ERCC6L | Crizotinib        | -0.06929 | 0.602373 | 54821 |
| ERCC6L | Cyclopamine       | -0.00669 | 0.964346 | 54821 |
| ERCC6L | Cytarabine        | -0.05741 | 0.241126 | 54821 |
| ERCC6L | DMOG              | -0.03539 | 0.462826 | 54821 |
| ERCC6L | Dabrafenib        | 0.075473 | 0.068431 | 54821 |
| ERCC6L | Dasatinib         | -0.05592 | 0.4218   | 54821 |
| ERCC6L | Docetaxel         | -0.02733 | 0.493913 | 54821 |
| ERCC6L | Doxorubicin       | 0.014503 | 0.856445 | 54821 |
| ERCC6L | EHT 1864          | 0.082474 | 0.135047 | 54821 |
| ERCC6L | EKB-569           | -0.03952 | 0.348092 | 54821 |
| ERCC6L | EX-527            | -0.04449 | 0.670471 | 54821 |
| ERCC6L | Elesclomol        | -0.0688  | 0.112755 | 54821 |
| ERCC6L | Embelin           | -0.02274 | 0.745571 | 54821 |
| ERCC6L | Epothilone B      | -0.00849 | 0.893894 | 54821 |
| ERCC6L | Erlotinib         | 0.072431 | 0.323007 | 54821 |
| ERCC6L | Etoposide         | -0.04776 | 0.316311 | 54821 |
| ERCC6L | FH535             | 0.00795  | 0.896837 | 54821 |
| ERCC6L | FK866             | -0.08179 | 0.024706 | 54821 |
| ERCC6L | FMK               | 0.009415 | 0.915941 | 54821 |
| ERCC6L | FR-180204         | 0.07004  | 0.140749 | 54821 |
| ERCC6L | FTI-277           | 0.091922 | 0.021946 | 54821 |
| ERCC6L | Foretinib         | -0.02978 | 0.509417 | 54821 |

|        |                    |          |          |       |
|--------|--------------------|----------|----------|-------|
| ERCC6L | GDC0449            | 0.020049 | 0.868182 | 54821 |
| ERCC6L | GDC0941            | -0.05984 | 0.247163 | 54821 |
| ERCC6L | GNF-2              | -0.03522 | 0.896506 | 54821 |
| ERCC6L | GSK-650394         | -0.00163 | 0.986343 | 54821 |
| ERCC6L | GSK1070916         | -0.09639 | 0.008159 | 54821 |
| ERCC6L | GSK1904529A        | -0.02588 | 0.608363 | 54821 |
| ERCC6L | GSK2126458         | -0.04559 | 0.240933 | 54821 |
| ERCC6L | GSK269962A         | -0.01996 | 0.745193 | 54821 |
| ERCC6L | GSK429286A         | -0.10887 | 0.004478 | 54821 |
| ERCC6L | GSK690693          | -0.11463 | 0.001427 | 54821 |
| ERCC6L | GW 441756          | -0.03821 | 0.846614 | 54821 |
| ERCC6L | GW-2580            | 0.007936 | 0.994893 | 54821 |
| ERCC6L | GW843682X          | -0.14982 | 0.042218 | 54821 |
| ERCC6L | Gefitinib          | 0.109077 | 0.005754 | 54821 |
| ERCC6L | Gemcitabine        | -0.04763 | 0.336581 | 54821 |
| ERCC6L | Genentech Cpd 10   | -0.08447 | 0.021101 | 54821 |
| ERCC6L | HG-5-113-01        | -0.07238 | 0.292222 | 54821 |
| ERCC6L | HG-5-88-01         | 0.037234 | 0.823369 | 54821 |
| ERCC6L | HG-6-64-1          | -0.00214 | 0.974592 | 54821 |
| ERCC6L | I-BET-762          | -0.07221 | 0.041888 | 54821 |
| ERCC6L | IOX2               | -0.00104 | 0.991631 | 54821 |
| ERCC6L | IPA-3              | -0.05642 | 0.158978 | 54821 |
| ERCC6L | Imatinib           | -0.01052 | 0.963404 | 54821 |
| ERCC6L | Ispinesib Mesylate | -0.03673 | 0.342796 | 54821 |
| ERCC6L | JNJ-26854165       | 0.031558 | 0.568695 | 54821 |
| ERCC6L | JNK Inhibitor VIII | 0.013292 | 0.785377 | 54821 |
| ERCC6L | JNK-9L             | 0.021887 | 0.741503 | 54821 |
| ERCC6L | JQ1                | 0.002231 | 0.969963 | 54821 |
| ERCC6L | JQ12               | 0.028097 | 0.638008 | 54821 |
| ERCC6L | JW-7-24-1          | -0.0638  | 0.079924 | 54821 |
| ERCC6L | JW-7-52-1          | -0.07218 | 0.453372 | 54821 |
| ERCC6L | KIN001-055         | 0.047881 | 0.428955 | 54821 |
| ERCC6L | KIN001-102         | -0.05362 | 0.143415 | 54821 |
| ERCC6L | KIN001-135         | 0.050816 | 0.640643 | 54821 |
| ERCC6L | KIN001-236         | -0.01576 | 0.704626 | 54821 |
| ERCC6L | KIN001-244         | -0.04423 | 0.248386 | 54821 |
| ERCC6L | KIN001-260         | -0.03983 | 0.296394 | 54821 |
| ERCC6L | KIN001-266         | -0.00596 | 0.919701 | 54821 |
| ERCC6L | KIN001-270         | -0.11085 | 0.003119 | 54821 |
| ERCC6L | KU-55933           | -0.05253 | 0.365984 | 54821 |
| ERCC6L | LAQ824             | -0.03595 | 0.390633 | 54821 |
| ERCC6L | LFM-A13            | 0.033016 | 0.543967 | 54821 |
| ERCC6L | LY317615           | -0.02745 | 0.563839 | 54821 |
| ERCC6L | Lapatinib          | 0.106906 | 0.086429 | 54821 |
| ERCC6L | Lenalidomide       | -0.07655 | 0.206974 | 54821 |
| ERCC6L | Linifanib          | 0.052898 | 0.287126 | 54821 |
| ERCC6L | Lisitinib          | 0.083557 | 0.114664 | 54821 |
| ERCC6L | MG-132             | -0.08079 | 0.335633 | 54821 |
| ERCC6L | MK-2206            | -0.08359 | 0.079186 | 54821 |
| ERCC6L | MLN4924            | 0.028352 | 0.648265 | 54821 |

|        |                     |          |          |       |
|--------|---------------------|----------|----------|-------|
| ERCC6L | MP470               | -0.0156  | 0.750953 | 54821 |
| ERCC6L | MPS-1-IN-1          | 0.002866 | 0.950384 | 54821 |
| ERCC6L | MS-275              | -0.08878 | 0.25197  | 54821 |
| ERCC6L | Masitinib           | -0.0319  | 0.42802  | 54821 |
| ERCC6L | Methotrexate        | -0.06229 | 0.099984 | 54821 |
| ERCC6L | Midostaurin         | 0.025416 | 0.605126 | 54821 |
| ERCC6L | Mitomycin C         | 0.008035 | 0.903302 | 54821 |
| ERCC6L | NG-25               | -0.04455 | 0.236236 | 54821 |
| ERCC6L | NPK76-II-72-1       | -0.12006 | 0.000565 | 54821 |
| ERCC6L | NSC-207895          | -0.14551 | 0.000217 | 54821 |
| ERCC6L | NSC-87877           | 0.086733 | 0.090581 | 54821 |
| ERCC6L | NU-7441             | -0.03499 | 0.648672 | 54821 |
| ERCC6L | Navitoclax          | -0.06581 | 0.082469 | 54821 |
| ERCC6L | Nilotinib           | -0.04021 | 0.451057 | 54821 |
| ERCC6L | Nutlin-3a (-)       | 0.102438 | 0.016315 | 54821 |
| ERCC6L | OSI-027             | -0.05826 | 0.114828 | 54821 |
| ERCC6L | OSI-930             | -0.03296 | 0.425297 | 54821 |
| ERCC6L | OSU-03012           | -0.018   | 0.757267 | 54821 |
| ERCC6L | Obatoclax Mesylate  | -0.00516 | 0.932645 | 54821 |
| ERCC6L | Olaparib            | 0.032902 | 0.475069 | 54821 |
| ERCC6L | PAC-1               | -0.04405 | 0.312809 | 54821 |
| ERCC6L | PD-0325901          | 0.116327 | 0.002444 | 54821 |
| ERCC6L | PD-0332991          | 0.020151 | 0.760531 | 54821 |
| ERCC6L | PD-173074           | -0.03382 | 0.829174 | 54821 |
| ERCC6L | PF-4708671          | 0.055737 | 0.535089 | 54821 |
| ERCC6L | PF-562271           | -0.00025 | 0.997467 | 54821 |
| ERCC6L | PFI-1               | 0.0093   | 0.879436 | 54821 |
| ERCC6L | PHA-665752          | 0.085852 | 0.528136 | 54821 |
| ERCC6L | PHA-793887          | -0.04013 | 0.275879 | 54821 |
| ERCC6L | PI-103              | -0.06321 | 0.085302 | 54821 |
| ERCC6L | PIK-93              | -0.08606 | 0.015354 | 54821 |
| ERCC6L | PLX4720             | 0.068555 | 0.090473 | 54821 |
| ERCC6L | Paclitaxel          | -0.10058 | 0.278389 | 54821 |
| ERCC6L | Parthenolide        | -0.03274 | 0.783154 | 54821 |
| ERCC6L | Pazopanib           | 0.022333 | 0.72147  | 54821 |
| ERCC6L | Phenformin          | -0.00792 | 0.853939 | 54821 |
| ERCC6L | Pyrimethamine       | -0.01603 | 0.910668 | 54821 |
| ERCC6L | QL-VIII-58          | -0.02256 | 0.810831 | 54821 |
| ERCC6L | QL-X-138            | -0.07852 | 0.032596 | 54821 |
| ERCC6L | QL-XI-92            | -0.07034 | 0.054266 | 54821 |
| ERCC6L | QL-XII-47           | -0.03276 | 0.440903 | 54821 |
| ERCC6L | QL-XII-61           | -0.06281 | 0.347222 | 54821 |
| ERCC6L | QS11                | -0.00707 | 0.934908 | 54821 |
| ERCC6L | RDEA119             | 0.153188 | 1.09E-05 | 54821 |
| ERCC6L | RO-3306             | 0.01136  | 0.813503 | 54821 |
| ERCC6L | Rapamycin           | -0.09372 | 0.368279 | 54821 |
| ERCC6L | Roscovitine         | 0.050554 | 0.774184 | 54821 |
| ERCC6L | Ruxolitinib         | -0.02831 | 0.619745 | 54821 |
| ERCC6L | S-Trytyl-L-cysteine | -0.0676  | 0.406858 | 54821 |
| ERCC6L | SB 216763           | 0.041349 | 0.416596 | 54821 |

|        |              |          |          |       |
|--------|--------------|----------|----------|-------|
| ERCC6L | SB 505124    | 0.025343 | 0.771332 | 54821 |
| ERCC6L | SB52334      | 0.031255 | 0.54479  | 54821 |
| ERCC6L | SB590885     | 0.106179 | 0.015796 | 54821 |
| ERCC6L | SGC0946      | -0.00031 | 0.996778 | 54821 |
| ERCC6L | SL 0101-1    | 0.069113 | 0.343581 | 54821 |
| ERCC6L | SN-38        | -0.02429 | 0.623349 | 54821 |
| ERCC6L | SNX-2112     | -0.05017 | 0.183067 | 54821 |
| ERCC6L | STF-62247    | -0.07266 | 0.066701 | 54821 |
| ERCC6L | Salubrinal   | 0.012623 | 0.907568 | 54821 |
| ERCC6L | Saracatinib  | -0.06297 | 0.454465 | 54821 |
| ERCC6L | Shikonin     | -0.02974 | 0.606524 | 54821 |
| ERCC6L | Sorafenib    | 0.117227 | 0.172316 | 54821 |
| ERCC6L | Sunitinib    | 0.016939 | 0.858756 | 54821 |
| ERCC6L | T0901317     | -0.04903 | 0.240256 | 54821 |
| ERCC6L | TAE684       | -0.05578 | 0.626344 | 54821 |
| ERCC6L | TAK-715      | -0.04191 | 0.270141 | 54821 |
| ERCC6L | TG101348     | -0.04262 | 0.255387 | 54821 |
| ERCC6L | TGX221       | 0.041282 | 0.551656 | 54821 |
| ERCC6L | THZ-2-102-1  | -0.08475 | 0.019364 | 54821 |
| ERCC6L | THZ-2-49     | -0.04023 | 0.296492 | 54821 |
| ERCC6L | TL-1-85      | -0.04475 | 0.236367 | 54821 |
| ERCC6L | TL-2-105     | -0.03901 | 0.318627 | 54821 |
| ERCC6L | TPCA-1       | -0.08743 | 0.01383  | 54821 |
| ERCC6L | TW 37        | -0.08151 | 0.052934 | 54821 |
| ERCC6L | Talazoparib  | 0.00599  | 0.915067 | 54821 |
| ERCC6L | Tamoxifen    | 0.03008  | 0.814148 | 54821 |
| ERCC6L | Temozolomide | -0.01528 | 0.866878 | 54821 |
| ERCC6L | Temsirolimus | -0.09701 | 0.024724 | 54821 |
| ERCC6L | Thapsigargin | -0.02526 | 0.737202 | 54821 |
| ERCC6L | Tipifarnib   | -0.00138 | 0.98816  | 54821 |
| ERCC6L | Tivozanib    | -0.04581 | 0.42411  | 54821 |
| ERCC6L | Trametinib   | 0.157301 | 9.52E-06 | 54821 |
| ERCC6L | Tubastatin A | -0.03776 | 0.314749 | 54821 |
| ERCC6L | UNC0638      | -0.04159 | 0.25735  | 54821 |
| ERCC6L | UNC1215      | 0.051051 | 0.305608 | 54821 |
| ERCC6L | VNLG/124     | 0.031955 | 0.471806 | 54821 |
| ERCC6L | VX-11e       | 0.100306 | 0.017306 | 54821 |
| ERCC6L | VX-680       | -0.06378 | 0.497518 | 54821 |
| ERCC6L | VX-702       | 0.012932 | 0.963653 | 54821 |
| ERCC6L | Veliparib    | 0.018023 | 0.823935 | 54821 |
| ERCC6L | Vinblastine  | -0.09192 | 0.026608 | 54821 |
| ERCC6L | Vinorelbine  | -0.05457 | 0.301982 | 54821 |
| ERCC6L | Vorinostat   | -0.11895 | 0.001065 | 54821 |
| ERCC6L | WH-4-023     | -0.03744 | 0.663944 | 54821 |
| ERCC6L | WZ-1-84      | 0.025837 | 0.775313 | 54821 |
| ERCC6L | WZ3105       | -0.06633 | 0.067164 | 54821 |
| ERCC6L | XAV939       | 0.005318 | 0.909516 | 54821 |
| ERCC6L | XL-184       | 0.035278 | 0.473513 | 54821 |
| ERCC6L | XMD11-85h    | 0.025137 | 0.900288 | 54821 |
| ERCC6L | XMD13-2      | -0.03824 | 0.313733 | 54821 |

|        |                    |          |          |        |
|--------|--------------------|----------|----------|--------|
| ERCC6L | XMD14-99           | 0.032655 | 0.422258 | 54821  |
| ERCC6L | XMD15-27           | -0.01827 | 0.737946 | 54821  |
| ERCC6L | XMD8-85            | 0.035904 | 0.699446 | 54821  |
| ERCC6L | XMD8-92            | -0.05989 | 0.573198 | 54821  |
| ERCC6L | Y-39983            | -0.12728 | 0.000406 | 54821  |
| ERCC6L | YK 4-279           | -0.06398 | 0.205564 | 54821  |
| ERCC6L | YM155              | -0.09348 | 0.037219 | 54821  |
| ERCC6L | YM201636           | -0.05076 | 0.180078 | 54821  |
| ERCC6L | Z-LLN1e-CHO        | -0.04404 | 0.58624  | 54821  |
| ERCC6L | ZG-10              | -0.09021 | 0.14888  | 54821  |
| ERCC6L | ZM-447439          | -0.06839 | 0.125304 | 54821  |
| ERCC6L | ZSTK474            | -0.06561 | 0.074727 | 54821  |
| ERCC6L | Zibotentan         | -0.02226 | 0.949888 | 54821  |
| ERCC6L | piperlongumine     | -0.04363 | 0.328411 | 54821  |
| ERCC6L | rTRAIL             | 0.042195 | 0.566393 | 54821  |
| ERCC6L | selumetinib        | 0.162343 | 3.15E-06 | 54821  |
| ESC02  | (5Z)-7-oxozeaenol  | 0.112071 | 0.003094 | 157570 |
| ESC02  | 17-AAG             | 0.215953 | 1.43E-09 | 157570 |
| ESC02  | 5-Fluorouracil     | -0.11991 | 0.000799 | 157570 |
| ESC02  | 681640             | 0.027234 | 0.67706  | 157570 |
| ESC02  | A-443654           | -0.09317 | 0.514381 | 157570 |
| ESC02  | A-770041           | -0.07647 | 0.330197 | 157570 |
| ESC02  | AC220              | -0.07609 | 0.080285 | 157570 |
| ESC02  | AG-014699          | 0.082648 | 0.044567 | 157570 |
| ESC02  | AICAR              | -0.15872 | 2.51E-05 | 157570 |
| ESC02  | AKT inhibitor VIII | 0.092052 | 0.029744 | 157570 |
| ESC02  | AMG-706            | 0.080882 | 0.118164 | 157570 |
| ESC02  | AP-24534           | -0.16243 | 1.43E-05 | 157570 |
| ESC02  | AR-42              | -0.20363 | 3.57E-09 | 157570 |
| ESC02  | AS601245           | 0.074199 | 0.132469 | 157570 |
| ESC02  | AS605240           | -0.04885 | 0.260838 | 157570 |
| ESC02  | AT-7519            | -0.20723 | 1.51E-09 | 157570 |
| ESC02  | ATRA               | -0.11431 | 0.006996 | 157570 |
| ESC02  | AUY922             | 0.009704 | 0.888883 | 157570 |
| ESC02  | AZ628              | 0.051572 | 0.521536 | 157570 |
| ESC02  | AZD6482            | -0.01515 | 0.795033 | 157570 |
| ESC02  | AZD7762            | -0.21541 | 5.17E-09 | 157570 |
| ESC02  | AZD8055            | -0.2     | 6.79E-08 | 157570 |
| ESC02  | Afatinib           | 0.114912 | 0.001342 | 157570 |
| ESC02  | Axitinib           | -0.085   | 0.068418 | 157570 |
| ESC02  | BAY 61-3606        | -0.13009 | 0.00072  | 157570 |
| ESC02  | BEZ235             | -0.0362  | 0.480953 | 157570 |
| ESC02  | BHG712             | -0.20716 | 1.83E-09 | 157570 |
| ESC02  | BI-2536            | -0.1475  | 0.089113 | 157570 |
| ESC02  | BIRB 0796          | 0.081633 | 0.087293 | 157570 |
| ESC02  | BIX02189           | -0.21852 | 2.35E-10 | 157570 |
| ESC02  | BMS-509744         | 0.012199 | 0.915822 | 157570 |
| ESC02  | BMS-536924         | -0.00989 | 0.920004 | 157570 |
| ESC02  | BMS-708163         | 0.120268 | 0.001741 | 157570 |
| ESC02  | BMS-754807         | 0.046926 | 0.389161 | 157570 |

|       |                   |          |          |        |
|-------|-------------------|----------|----------|--------|
| ESC02 | BMS345541         | -0.22839 | 2.47E-11 | 157570 |
| ESC02 | BX-795            | -0.10201 | 0.013922 | 157570 |
| ESC02 | BX-912            | -0.24153 | 9.42E-13 | 157570 |
| ESC02 | Belinostat        | -0.17048 | 1.69E-06 | 157570 |
| ESC02 | Bexarotene        | -0.02318 | 0.791755 | 157570 |
| ESC02 | Bicalutamide      | 0.051397 | 0.24784  | 157570 |
| ESC02 | Bleomycin         | 0.050912 | 0.350044 | 157570 |
| ESC02 | Bleomycin (50 uM) | 0.183342 | 1.48E-07 | 157570 |
| ESC02 | Bortezomib        | -0.01786 | 0.861093 | 157570 |
| ESC02 | Bosutinib         | -0.09138 | 0.044824 | 157570 |
| ESC02 | Bryostatins 1     | 0.069626 | 0.151889 | 157570 |
| ESC02 | CAL-101           | -0.20763 | 2.79E-09 | 157570 |
| ESC02 | CAY10603          | -0.19934 | 7.31E-09 | 157570 |
| ESC02 | CCT007093         | 0.128917 | 0.001214 | 157570 |
| ESC02 | CCT018159         | 0.032369 | 0.55696  | 157570 |
| ESC02 | CEP-701           | -0.16295 | 1.5E-05  | 157570 |
| ESC02 | CGP-082996        | -0.00671 | 0.96101  | 157570 |
| ESC02 | CGP-60474         | -0.02127 | 0.842267 | 157570 |
| ESC02 | CH5424802         | -0.01531 | 0.835979 | 157570 |
| ESC02 | CHIR-99021        | 0.062441 | 0.103455 | 157570 |
| ESC02 | CI-1040           | 0.081356 | 0.051146 | 157570 |
| ESC02 | CMK               | -0.02671 | 0.850474 | 157570 |
| ESC02 | CP466722          | -0.22438 | 4.83E-11 | 157570 |
| ESC02 | CP724714          | 0.070906 | 0.143672 | 157570 |
| ESC02 | CUDC-101          | -0.19122 | 5.11E-08 | 157570 |
| ESC02 | CX-5461           | -0.16904 | 1.47E-06 | 157570 |
| ESC02 | Camptothecin      | -0.10494 | 0.009348 | 157570 |
| ESC02 | Cetuximab         | 0.132946 | 0.000493 | 157570 |
| ESC02 | Cisplatin         | 0.031367 | 0.552403 | 157570 |
| ESC02 | Crizotinib        | -0.08769 | 0.455238 | 157570 |
| ESC02 | Cyclophosphamide  | -0.04334 | 0.712864 | 157570 |
| ESC02 | Cytarabine        | -0.0197  | 0.738135 | 157570 |
| ESC02 | DMOG              | -0.13764 | 0.000482 | 157570 |
| ESC02 | Dabrafenib        | 0.082224 | 0.04465  | 157570 |
| ESC02 | Dasatinib         | 0.007166 | 0.929675 | 157570 |
| ESC02 | Docetaxel         | 0.163573 | 7.5E-06  | 157570 |
| ESC02 | Doxorubicin       | -0.01452 | 0.856232 | 157570 |
| ESC02 | EHT 1864          | 0.030986 | 0.669544 | 157570 |
| ESC02 | EKB-569           | -0.12886 | 0.000577 | 157570 |
| ESC02 | EX-527            | -0.01941 | 0.87659  | 157570 |
| ESC02 | Elesclomol        | 0.020256 | 0.688311 | 157570 |
| ESC02 | Embelin           | 0.023896 | 0.73032  | 157570 |
| ESC02 | Epothilone B      | 0.031202 | 0.568604 | 157570 |
| ESC02 | Erlotinib         | 0.112557 | 0.108401 | 157570 |
| ESC02 | Etoposide         | -0.09842 | 0.020695 | 157570 |
| ESC02 | FH535             | 0.093207 | 0.030492 | 157570 |
| ESC02 | FK866             | -0.23441 | 1.01E-11 | 157570 |
| ESC02 | FMK               | -0.06493 | 0.292637 | 157570 |
| ESC02 | FR-180204         | -0.07935 | 0.088286 | 157570 |
| ESC02 | FTI-277           | 0.191347 | 5.23E-07 | 157570 |



|       |                    |          |          |        |
|-------|--------------------|----------|----------|--------|
| ESC02 | Foretinib          | -0.16659 | 5.2E-06  | 157570 |
| ESC02 | GDC0449            | -0.01548 | 0.905858 | 157570 |
| ESC02 | GDC0941            | -0.09861 | 0.031277 | 157570 |
| ESC02 | GNF-2              | -0.05861 | 0.80029  | 157570 |
| ESC02 | GSK-650394         | -0.04641 | 0.510902 | 157570 |
| ESC02 | GSK1070916         | -0.25417 | 1.51E-13 | 157570 |
| ESC02 | GSK1904529A        | 0.081773 | 0.060192 | 157570 |
| ESC02 | GSK2126458         | -0.19597 | 2.4E-08  | 157570 |
| ESC02 | GSK269962A         | -0.018   | 0.772832 | 157570 |
| ESC02 | GSK429286A         | -0.16307 | 9.92E-06 | 157570 |
| ESC02 | GSK690693          | -0.24247 | 1.72E-12 | 157570 |
| ESC02 | GW 441756          | -0.00666 | 0.990735 | 157570 |
| ESC02 | GW-2580            | -0.01402 | 0.986416 | 157570 |
| ESC02 | GW843682X          | -0.1513  | 0.040082 | 157570 |
| ESC02 | Gefitinib          | 0.106515 | 0.007141 | 157570 |
| ESC02 | Gemcitabine        | -0.08639 | 0.054737 | 157570 |
| ESC02 | Genentech Cpd 10   | -0.18277 | 1.56E-07 | 157570 |
| ESC02 | HG-5-113-01        | -0.07721 | 0.254837 | 157570 |
| ESC02 | HG-5-88-01         | 0.012093 | 0.95712  | 157570 |
| ESC02 | HG-6-64-1          | -0.05144 | 0.280451 | 157570 |
| ESC02 | I-BET-762          | -0.28482 | 1.29E-17 | 157570 |
| ESC02 | IOX2               | 0.033817 | 0.579428 | 157570 |
| ESC02 | IPA-3              | -0.15055 | 5.21E-05 | 157570 |
| ESC02 | Imatinib           | -0.1004  | 0.359009 | 157570 |
| ESC02 | Ispinesib Mesylate | -0.14856 | 2.49E-05 | 157570 |
| ESC02 | JNJ-26854165       | 0.052594 | 0.290776 | 157570 |
| ESC02 | JNK Inhibitor VIII | 0.10287  | 0.011214 | 157570 |
| ESC02 | JNK-9L             | -0.04182 | 0.467663 | 157570 |
| ESC02 | JQ1                | -0.07394 | 0.072627 | 157570 |
| ESC02 | JQ12               | -0.02616 | 0.663632 | 157570 |
| ESC02 | JW-7-24-1          | -0.217   | 2.16E-10 | 157570 |
| ESC02 | JW-7-52-1          | -0.0196  | 0.878443 | 157570 |
| ESC02 | KIN001-055         | -0.00611 | 0.947124 | 157570 |
| ESC02 | KIN001-102         | -0.22566 | 3.52E-11 | 157570 |
| ESC02 | KIN001-135         | 0.078556 | 0.417894 | 157570 |
| ESC02 | KIN001-236         | -0.17776 | 4.22E-07 | 157570 |
| ESC02 | KIN001-244         | -0.21803 | 3.3E-10  | 157570 |
| ESC02 | KIN001-260         | -0.21477 | 4.73E-10 | 157570 |
| ESC02 | KIN001-266         | -0.10103 | 0.019729 | 157570 |
| ESC02 | KIN001-270         | -0.13055 | 0.000437 | 157570 |
| ESC02 | KU-55933           | -0.0965  | 0.052845 | 157570 |
| ESC02 | LAQ824             | -0.14652 | 8.41E-05 | 157570 |
| ESC02 | LFM-A13            | 0.052927 | 0.287317 | 157570 |
| ESC02 | LY317615           | -0.10783 | 0.007007 | 157570 |
| ESC02 | Lapatinib          | 0.189862 | 0.001189 | 157570 |
| ESC02 | Lenalidomide       | -0.06895 | 0.274315 | 157570 |
| ESC02 | Linifanib          | -0.05582 | 0.255701 | 157570 |
| ESC02 | Lisitinib          | 0.047831 | 0.445551 | 157570 |
| ESC02 | MG-132             | 0.012426 | 0.921204 | 157570 |
| ESC02 | MK-2206            | -0.14574 | 0.000924 | 157570 |

|       |                     |          |          |        |
|-------|---------------------|----------|----------|--------|
| ESC02 | MLN4924             | 0.083654 | 0.110055 | 157570 |
| ESC02 | MP470               | -0.05482 | 0.203663 | 157570 |
| ESC02 | MPS-1-IN-1          | -0.11604 | 0.001471 | 157570 |
| ESC02 | MS-275              | -0.1695  | 0.014489 | 157570 |
| ESC02 | Masitinib           | -0.16406 | 4.03E-06 | 157570 |
| ESC02 | Methotrexate        | -0.23423 | 3.36E-11 | 157570 |
| ESC02 | Midostaurin         | 0.046994 | 0.301286 | 157570 |
| ESC02 | Mitomycin C         | -0.09255 | 0.040536 | 157570 |
| ESC02 | NG-25               | -0.2409  | 1.44E-12 | 157570 |
| ESC02 | NPK76-II-72-1       | -0.31694 | 7.75E-22 | 157570 |
| ESC02 | NSC-207895          | -0.15606 | 6.9E-05  | 157570 |
| ESC02 | NSC-87877           | 0.130718 | 0.009192 | 157570 |
| ESC02 | NU-7441             | -0.06133 | 0.348837 | 157570 |
| ESC02 | Navitoclax          | -0.29962 | 7.62E-18 | 157570 |
| ESC02 | Nilotinib           | -0.11018 | 0.01211  | 157570 |
| ESC02 | Nutlin-3a (-)       | -0.00684 | 0.911105 | 157570 |
| ESC02 | OSI-027             | -0.20194 | 5.54E-09 | 157570 |
| ESC02 | OSI-930             | -0.1141  | 0.002109 | 157570 |
| ESC02 | OSU-03012           | -0.04759 | 0.337743 | 157570 |
| ESC02 | Obatoclax Mesylate  | -0.02283 | 0.671537 | 157570 |
| ESC02 | Olaparib            | 0.064788 | 0.129992 | 157570 |
| ESC02 | PAC-1               | -0.15654 | 4.29E-05 | 157570 |
| ESC02 | PD-0325901          | 0.167066 | 7.86E-06 | 157570 |
| ESC02 | PD-0332991          | -0.00952 | 0.898149 | 157570 |
| ESC02 | PD-173074           | -0.03485 | 0.823865 | 157570 |
| ESC02 | PF-4708671          | 0.043078 | 0.658073 | 157570 |
| ESC02 | PF-562271           | 0.029898 | 0.625211 | 157570 |
| ESC02 | PFI-1               | -0.03412 | 0.505828 | 157570 |
| ESC02 | PHA-665752          | 0.026487 | 0.875673 | 157570 |
| ESC02 | PHA-793887          | -0.2116  | 4.73E-10 | 157570 |
| ESC02 | PI-103              | -0.22064 | 1.49E-10 | 157570 |
| ESC02 | PIK-93              | -0.29629 | 5.83E-19 | 157570 |
| ESC02 | PLX4720             | 0.093947 | 0.015793 | 157570 |
| ESC02 | Paclitaxel          | -0.01909 | 0.899018 | 157570 |
| ESC02 | Parthenolide        | -0.07253 | 0.464234 | 157570 |
| ESC02 | Pazopanib           | 0.025283 | 0.680099 | 157570 |
| ESC02 | Phenformin          | -0.12484 | 0.000549 | 157570 |
| ESC02 | Pyrimethamine       | -0.03821 | 0.764465 | 157570 |
| ESC02 | QL-VIII-58          | -0.00201 | 0.986614 | 157570 |
| ESC02 | QL-X-138            | -0.20784 | 2.18E-09 | 157570 |
| ESC02 | QL-XI-92            | -0.22333 | 7.63E-11 | 157570 |
| ESC02 | QL-XII-47           | -0.12049 | 0.00136  | 157570 |
| ESC02 | QL-XII-61           | -0.15218 | 0.007797 | 157570 |
| ESC02 | QS11                | -0.09649 | 0.070222 | 157570 |
| ESC02 | RDEA119             | 0.178267 | 2.4E-07  | 157570 |
| ESC02 | RO-3306             | 0.104569 | 0.009809 | 157570 |
| ESC02 | Rapamycin           | -0.08815 | 0.40127  | 157570 |
| ESC02 | Roscovitine         | 0.084741 | 0.574217 | 157570 |
| ESC02 | Ruxolitinib         | -0.03382 | 0.535598 | 157570 |
| ESC02 | S-Trityl-L-cysteine | -0.09756 | 0.19843  | 157570 |

|       |              |          |          |        |
|-------|--------------|----------|----------|--------|
| ESC02 | SB 216763    | 0.058764 | 0.232287 | 157570 |
| ESC02 | SB 505124    | 0.044249 | 0.546338 | 157570 |
| ESC02 | SB52334      | -0.02898 | 0.580334 | 157570 |
| ESC02 | SB590885     | 0.123886 | 0.003647 | 157570 |
| ESC02 | SGC0946      | 0.079274 | 0.088413 | 157570 |
| ESC02 | SL 0101-1    | 0.043268 | 0.574678 | 157570 |
| ESC02 | SN-38        | -0.0015  | 0.979994 | 157570 |
| ESC02 | SNX-2112     | -0.19899 | 9.21E-09 | 157570 |
| ESC02 | STF-62247    | -0.14883 | 7.72E-05 | 157570 |
| ESC02 | Salubrinol   | -0.04877 | 0.587531 | 157570 |
| ESC02 | Saracatinib  | -0.06823 | 0.411433 | 157570 |
| ESC02 | Shikonin     | -0.06679 | 0.177655 | 157570 |
| ESC02 | Sorafenib    | -0.02013 | 0.882182 | 157570 |
| ESC02 | Sunitinib    | -0.11341 | 0.095334 | 157570 |
| ESC02 | T0901317     | -0.15241 | 4.37E-05 | 157570 |
| ESC02 | TAE684       | 0.036109 | 0.786723 | 157570 |
| ESC02 | TAK-715      | -0.19232 | 3.16E-08 | 157570 |
| ESC02 | TG101348     | -0.21372 | 4.04E-10 | 157570 |
| ESC02 | TGX221       | 0.133541 | 0.029598 | 157570 |
| ESC02 | THZ-2-102-1  | -0.23518 | 8.2E-12  | 157570 |
| ESC02 | THZ-2-49     | -0.14235 | 6.85E-05 | 157570 |
| ESC02 | TL-1-85      | -0.22724 | 3.01E-11 | 157570 |
| ESC02 | TL-2-105     | -0.16993 | 1.55E-06 | 157570 |
| ESC02 | TPCA-1       | -0.2753  | 2.21E-16 | 157570 |
| ESC02 | TW 37        | -0.04961 | 0.281295 | 157570 |
| ESC02 | Talazoparib  | 0.024475 | 0.624256 | 157570 |
| ESC02 | Tamoxifen    | 0.003127 | 0.986862 | 157570 |
| ESC02 | Temozolomide | -0.00872 | 0.930296 | 157570 |
| ESC02 | Temsirolimus | -0.11562 | 0.005966 | 157570 |
| ESC02 | Thapsigargin | 0.022163 | 0.776248 | 157570 |
| ESC02 | Tipifarnib   | 0.005494 | 0.954484 | 157570 |
| ESC02 | Tivozanib    | -0.07476 | 0.132012 | 157570 |
| ESC02 | Trametinib   | 0.234253 | 1.52E-11 | 157570 |
| ESC02 | Tubastatin A | -0.18714 | 5.69E-08 | 157570 |
| ESC02 | UNC0638      | -0.17402 | 2.81E-07 | 157570 |
| ESC02 | UNC1215      | 0.102889 | 0.021312 | 157570 |
| ESC02 | VNLG/124     | -0.12237 | 0.001297 | 157570 |
| ESC02 | VX-11e       | 0.011937 | 0.842369 | 157570 |
| ESC02 | VX-680       | -0.13111 | 0.101798 | 157570 |
| ESC02 | VX-702       | -0.05429 | 0.754305 | 157570 |
| ESC02 | Veliparib    | -0.00584 | 0.951423 | 157570 |
| ESC02 | Vinblastine  | -0.07197 | 0.09127  | 157570 |
| ESC02 | Vinorelbine  | -0.08176 | 0.094414 | 157570 |
| ESC02 | Vorinostat   | -0.2615  | 9.72E-14 | 157570 |
| ESC02 | WH-4-023     | 0.035115 | 0.687172 | 157570 |
| ESC02 | WZ-1-84      | 0.012854 | 0.891967 | 157570 |
| ESC02 | WZ3105       | -0.19822 | 7.43E-09 | 157570 |
| ESC02 | XAV939       | 0.065755 | 0.091684 | 157570 |
| ESC02 | XL-184       | -0.10451 | 0.01121  | 157570 |
| ESC02 | XMD11-85h    | 0.001581 | 0.995823 | 157570 |

|       |                    |          |          |        |
|-------|--------------------|----------|----------|--------|
| ESC02 | XMD13-2            | -0.20419 | 2.77E-09 | 157570 |
| ESC02 | XMD14-99           | -0.09344 | 0.011694 | 157570 |
| ESC02 | XMD15-27           | -0.08442 | 0.05048  | 157570 |
| ESC02 | XMD8-85            | -0.05342 | 0.5344   | 157570 |
| ESC02 | XMD8-92            | -0.07006 | 0.487019 | 157570 |
| ESC02 | Y-39983            | -0.24247 | 2.58E-12 | 157570 |
| ESC02 | YK 4-279           | 0.048055 | 0.370821 | 157570 |
| ESC02 | YM155              | -0.07663 | 0.10018  | 157570 |
| ESC02 | YM201636           | -0.21769 | 3.26E-10 | 157570 |
| ESC02 | Z-LLN1e-CHO        | -0.05909 | 0.440015 | 157570 |
| ESC02 | ZG-10              | -0.13895 | 0.016507 | 157570 |
| ESC02 | ZM-447439          | -0.16311 | 4.97E-05 | 157570 |
| ESC02 | ZSTK474            | -0.22367 | 8.35E-11 | 157570 |
| ESC02 | Zibotentan         | -0.03369 | 0.902712 | 157570 |
| ESC02 | piperlongumine     | 0.086524 | 0.033251 | 157570 |
| ESC02 | rTRAIL             | 0.027592 | 0.734495 | 157570 |
| ESC02 | selumetinib        | 0.192634 | 2.23E-08 | 157570 |
| EX01  | (5Z)-7-Oxozeaenol  | 0.145931 | 7.8E-05  | 9156   |
| EX01  | 17-AAG             | 0.207567 | 6.4E-09  | 9156   |
| EX01  | 5-Fluorouracil     | -0.07654 | 0.036706 | 9156   |
| EX01  | 681640             | 0.029579 | 0.647118 | 9156   |
| EX01  | A-443654           | -0.01405 | 0.957562 | 9156   |
| EX01  | A-770041           | 0.073424 | 0.353124 | 9156   |
| EX01  | AC220              | -0.04606 | 0.335478 | 9156   |
| EX01  | AG-014699          | 0.078753 | 0.056219 | 9156   |
| EX01  | AICAR              | -0.11814 | 0.002029 | 9156   |
| EX01  | AKT inhibitor VIII | 0.108575 | 0.009148 | 9156   |
| EX01  | AMG-706            | 0.048629 | 0.409366 | 9156   |
| EX01  | AP-24534           | -0.03138 | 0.48041  | 9156   |
| EX01  | AR-42              | -0.16351 | 2.74E-06 | 9156   |
| EX01  | AS601245           | 0.106226 | 0.019676 | 9156   |
| EX01  | AS605240           | -0.03327 | 0.469644 | 9156   |
| EX01  | AT-7519            | -0.1298  | 0.000216 | 9156   |
| EX01  | ATRA               | -0.04493 | 0.366508 | 9156   |
| EX01  | AUY922             | 0.097111 | 0.031227 | 9156   |
| EX01  | AZ628              | 0.115553 | 0.091781 | 9156   |
| EX01  | AZD6482            | 0.066938 | 0.121473 | 9156   |
| EX01  | AZD7762            | -0.13248 | 0.000513 | 9156   |
| EX01  | AZD8055            | -0.08451 | 0.030607 | 9156   |
| EX01  | Afatinib           | 0.129146 | 0.000276 | 9156   |
| EX01  | Axitinib           | -0.0703  | 0.146679 | 9156   |
| EX01  | BAY 61-3606        | -0.01575 | 0.734686 | 9156   |
| EX01  | BEZ235             | 0.082252 | 0.065857 | 9156   |
| EX01  | BHG712             | -0.08799 | 0.014836 | 9156   |
| EX01  | BI-2536            | -0.04873 | 0.663175 | 9156   |
| EX01  | BIRB 0796          | 0.067674 | 0.167859 | 9156   |
| EX01  | BIX02189           | -0.10688 | 0.002919 | 9156   |
| EX01  | BMS-509744         | 0.026632 | 0.803116 | 9156   |
| EX01  | BMS-536924         | -0.01345 | 0.883851 | 9156   |
| EX01  | BMS-708163         | 0.118779 | 0.002013 | 9156   |

|      |                   |          |          |      |
|------|-------------------|----------|----------|------|
| EX01 | BMS-754807        | 0.047915 | 0.378101 | 9156 |
| EX01 | BMS345541         | -0.17257 | 6.55E-07 | 9156 |
| EX01 | BX-795            | -0.04279 | 0.364123 | 9156 |
| EX01 | BX-912            | -0.16368 | 2.14E-06 | 9156 |
| EX01 | Belinostat        | -0.13056 | 0.000303 | 9156 |
| EX01 | Bexarotene        | 0.037223 | 0.632558 | 9156 |
| EX01 | Bicalutamide      | 0.068807 | 0.108768 | 9156 |
| EX01 | Bleomycin         | 0.115042 | 0.011966 | 9156 |
| EX01 | Bleomycin (50 uM) | 0.185365 | 1.06E-07 | 9156 |
| EX01 | Bortezomib        | 0.095498 | 0.192104 | 9156 |
| EX01 | Bosutinib         | 0.01948  | 0.761446 | 9156 |
| EX01 | Bryostatins 1     | 0.090141 | 0.052954 | 9156 |
| EX01 | CAL-101           | -0.09066 | 0.014167 | 9156 |
| EX01 | CAY10603          | -0.14961 | 1.86E-05 | 9156 |
| EX01 | CCT007093         | 0.083738 | 0.042202 | 9156 |
| EX01 | CCT018159         | 0.060195 | 0.21858  | 9156 |
| EX01 | CEP-701           | -0.07638 | 0.056703 | 9156 |
| EX01 | CGP-082996        | 0.017778 | 0.887581 | 9156 |
| EX01 | CGP-60474         | 0.09857  | 0.200271 | 9156 |
| EX01 | CH5424802         | -0.06369 | 0.226259 | 9156 |
| EX01 | CHIR-99021        | 0.090964 | 0.014486 | 9156 |
| EX01 | CI-1040           | 0.125523 | 0.001548 | 9156 |
| EX01 | CMK               | 0.040587 | 0.752835 | 9156 |
| EX01 | CP466722          | -0.17029 | 8.78E-07 | 9156 |
| EX01 | CP724714          | 0.046404 | 0.385855 | 9156 |
| EX01 | CUDC-101          | -0.13218 | 0.000225 | 9156 |
| EX01 | CX-5461           | -0.13626 | 0.000127 | 9156 |
| EX01 | Camptothecin      | -0.05711 | 0.19228  | 9156 |
| EX01 | Cetuximab         | 0.09414  | 0.016633 | 9156 |
| EX01 | Cisplatin         | -0.00231 | 0.972246 | 9156 |
| EX01 | Crizotinib        | -0.02566 | 0.884085 | 9156 |
| EX01 | Cyclopamine       | 0.007628 | 0.959289 | 9156 |
| EX01 | Cytarabine        | -0.01773 | 0.765848 | 9156 |
| EX01 | DMOG              | -0.05    | 0.271538 | 9156 |
| EX01 | Dabrafenib        | 0.094932 | 0.018135 | 9156 |
| EX01 | Dasatinib         | 0.130499 | 0.038385 | 9156 |
| EX01 | Docetaxel         | 0.160367 | 1.15E-05 | 9156 |
| EX01 | Doxorubicin       | 0.049621 | 0.42259  | 9156 |
| EX01 | EHT 1864          | 0.004564 | 0.96217  | 9156 |
| EX01 | EKB-569           | -0.05856 | 0.1455   | 9156 |
| EX01 | EX-527            | -0.02801 | 0.814851 | 9156 |
| EX01 | Elesclomol        | 0.008509 | 0.87391  | 9156 |
| EX01 | Embelin           | 0.056174 | 0.31282  | 9156 |
| EX01 | Epothilone B      | 0.080427 | 0.089084 | 9156 |
| EX01 | Erlotinib         | 0.176538 | 0.006947 | 9156 |
| EX01 | Etoposide         | -0.05495 | 0.237902 | 9156 |
| EX01 | FH535             | 0.098398 | 0.021402 | 9156 |
| EX01 | FK866             | -0.17839 | 3.28E-07 | 9156 |
| EX01 | FMK               | 0.003083 | 0.973787 | 9156 |
| EX01 | FR-180204         | -0.02457 | 0.676046 | 9156 |

|      |                    |          |          |      |
|------|--------------------|----------|----------|------|
| EX01 | FTI-277            | 0.207706 | 4.71E-08 | 9156 |
| EX01 | Foretinib          | -0.06386 | 0.116258 | 9156 |
| EX01 | GDC0449            | 0.030488 | 0.778682 | 9156 |
| EX01 | GDC0941            | -7.1E-05 | 0.999317 | 9156 |
| EX01 | GNF-2              | -0.0384  | 0.885254 | 9156 |
| EX01 | GSK-650394         | 0.038833 | 0.602863 | 9156 |
| EX01 | GSK1070916         | -0.19441 | 2.63E-08 | 9156 |
| EX01 | GSK1904529A        | 0.069271 | 0.117618 | 9156 |
| EX01 | GSK2126458         | -0.09311 | 0.011493 | 9156 |
| EX01 | GSK269962A         | 0.050494 | 0.316445 | 9156 |
| EX01 | GSK429286A         | -0.10603 | 0.005752 | 9156 |
| EX01 | GSK690693          | -0.14398 | 4.89E-05 | 9156 |
| EX01 | GW 441756          | -0.02902 | 0.896458 | 9156 |
| EX01 | GW-2580            | 0.022289 | 0.967411 | 9156 |
| EX01 | GW843682X          | -0.07563 | 0.377327 | 9156 |
| EX01 | Gefitinib          | 0.130066 | 0.000829 | 9156 |
| EX01 | Gemcitabine        | -0.04039 | 0.428637 | 9156 |
| EX01 | Genentech Cpd 10   | -0.17069 | 1.06E-06 | 9156 |
| EX01 | HG-5-113-01        | -0.05143 | 0.485712 | 9156 |
| EX01 | HG-5-88-01         | -0.00151 | 0.995636 | 9156 |
| EX01 | HG-6-64-1          | 0.08027  | 0.066759 | 9156 |
| EX01 | I-BET-762          | -0.17902 | 1.6E-07  | 9156 |
| EX01 | IOX2               | 0.049379 | 0.382885 | 9156 |
| EX01 | IPA-3              | -0.06727 | 0.088491 | 9156 |
| EX01 | Imatinib           | -0.05941 | 0.698591 | 9156 |
| EX01 | Ispinesib Mesylate | -0.10751 | 0.002805 | 9156 |
| EX01 | JNJ-26854165       | 0.086147 | 0.057102 | 9156 |
| EX01 | JNK Inhibitor VIII | 0.068622 | 0.10275  | 9156 |
| EX01 | JNK-9L             | 0.038324 | 0.51515  | 9156 |
| EX01 | JQ1                | 0.010657 | 0.83922  | 9156 |
| EX01 | JQ12               | 0.003939 | 0.95622  | 9156 |
| EX01 | JW-7-24-1          | -0.15386 | 9.85E-06 | 9156 |
| EX01 | JW-7-52-1          | 0.038223 | 0.733786 | 9156 |
| EX01 | KIN001-055         | 0.020279 | 0.794578 | 9156 |
| EX01 | KIN001-102         | -0.174   | 4.51E-07 | 9156 |
| EX01 | KIN001-135         | 0.055405 | 0.603347 | 9156 |
| EX01 | KIN001-236         | -0.0833  | 0.023492 | 9156 |
| EX01 | KIN001-244         | -0.12107 | 0.000726 | 9156 |
| EX01 | KIN001-260         | -0.14173 | 5.87E-05 | 9156 |
| EX01 | KIN001-266         | -0.06199 | 0.17688  | 9156 |
| EX01 | KIN001-270         | -0.10691 | 0.004446 | 9156 |
| EX01 | KU-55933           | -0.0352  | 0.589817 | 9156 |
| EX01 | LAQ824             | -0.10177 | 0.00786  | 9156 |
| EX01 | LFM-A13            | 0.098878 | 0.030133 | 9156 |
| EX01 | LY317615           | -0.06591 | 0.121479 | 9156 |
| EX01 | Lapatinib          | 0.221989 | 0.000113 | 9156 |
| EX01 | Lenalidomide       | -0.03774 | 0.63016  | 9156 |
| EX01 | Linifanib          | 0.002536 | 0.971884 | 9156 |
| EX01 | Lisitinib          | 0.010948 | 0.89956  | 9156 |
| EX01 | MG-132             | 0.077798 | 0.358661 | 9156 |

|      |                    |          |          |      |
|------|--------------------|----------|----------|------|
| EX01 | MK-2206            | -0.06786 | 0.166967 | 9156 |
| EX01 | MLN4924            | 0.091493 | 0.076703 | 9156 |
| EX01 | MP470              | -0.09907 | 0.017384 | 9156 |
| EX01 | MPS-1-IN-1         | -0.09752 | 0.008189 | 9156 |
| EX01 | MS-275             | -0.15496 | 0.026566 | 9156 |
| EX01 | Masitinib          | -0.11332 | 0.001865 | 9156 |
| EX01 | Methotrexate       | -0.15573 | 1.58E-05 | 9156 |
| EX01 | Midostaurin        | 0.104463 | 0.011211 | 9156 |
| EX01 | Mitomycin C        | -0.05687 | 0.250777 | 9156 |
| EX01 | NG-25              | -0.13068 | 0.000202 | 9156 |
| EX01 | NPK76-II-72-1      | -0.23935 | 1.16E-12 | 9156 |
| EX01 | NSC-207895         | -0.11514 | 0.003989 | 9156 |
| EX01 | NSC-87877          | 0.104339 | 0.038038 | 9156 |
| EX01 | NU-7441            | 0.008123 | 0.942099 | 9156 |
| EX01 | Navitoclax         | -0.2226  | 3.67E-10 | 9156 |
| EX01 | Nilotinib          | -0.07672 | 0.100926 | 9156 |
| EX01 | Nutlin-3a (-)      | 0.063243 | 0.16866  | 9156 |
| EX01 | OSI-027            | -0.13572 | 0.000122 | 9156 |
| EX01 | OSI-930            | -0.05506 | 0.161704 | 9156 |
| EX01 | OSU-03012          | 0.033945 | 0.519155 | 9156 |
| EX01 | Obatoclax Mesylate | 0.031763 | 0.530298 | 9156 |
| EX01 | Olaparib           | 0.047491 | 0.28182  | 9156 |
| EX01 | PAC-1              | -0.08759 | 0.029928 | 9156 |
| EX01 | PD-0325901         | 0.186023 | 5.56E-07 | 9156 |
| EX01 | PD-0332991         | 0.042061 | 0.458376 | 9156 |
| EX01 | PD-173074          | -0.00402 | 0.990057 | 9156 |
| EX01 | PF-4708671         | 0.03687  | 0.732407 | 9156 |
| EX01 | PF-562271          | 0.076546 | 0.137187 | 9156 |
| EX01 | PFI-1              | 0.030914 | 0.553264 | 9156 |
| EX01 | PHA-665752         | 0.099052 | 0.437156 | 9156 |
| EX01 | PHA-793887         | -0.14593 | 2.42E-05 | 9156 |
| EX01 | PI-103             | -0.14005 | 7.18E-05 | 9156 |
| EX01 | PIK-93             | -0.17096 | 6.67E-07 | 9156 |
| EX01 | PLX4720            | 0.077459 | 0.052465 | 9156 |
| EX01 | Paclitaxel         | 0.055044 | 0.632577 | 9156 |
| EX01 | Parthenolide       | -0.01887 | 0.883671 | 9156 |
| EX01 | Pazopanib          | 0.060294 | 0.248094 | 9156 |
| EX01 | Phenformin         | -0.08568 | 0.020093 | 9156 |
| EX01 | Pyrimethamine      | -0.03182 | 0.803733 | 9156 |
| EX01 | QL-VIII-58         | 0.078444 | 0.268045 | 9156 |
| EX01 | QL-X-138           | -0.14202 | 6.35E-05 | 9156 |
| EX01 | QL-XI-92           | -0.13742 | 9.67E-05 | 9156 |
| EX01 | QL-XII-47          | -0.0789  | 0.042639 | 9156 |
| EX01 | QL-XII-61          | -0.1158  | 0.052437 | 9156 |
| EX01 | QS11               | -0.03679 | 0.571279 | 9156 |
| EX01 | RDEA119            | 0.218508 | 1.51E-10 | 9156 |
| EX01 | RO-3306            | 0.110124 | 0.006419 | 9156 |
| EX01 | Rapamycin          | 0.024527 | 0.873416 | 9156 |
| EX01 | Roscovitine        | 0.097663 | 0.499986 | 9156 |
| EX01 | Ruxolitinib        | -0.08622 | 0.052735 | 9156 |

|      |                     |          |          |      |
|------|---------------------|----------|----------|------|
| EX01 | S-Trytyl-L-cysteine | -0.02715 | 0.7807   | 9156 |
| EX01 | SB 216763           | 0.082642 | 0.081499 | 9156 |
| EX01 | SB 505124           | 0.061681 | 0.36184  | 9156 |
| EX01 | SB52334             | -0.07872 | 0.065474 | 9156 |
| EX01 | SB590885            | 0.100091 | 0.02452  | 9156 |
| EX01 | SGC0946             | 0.05504  | 0.280616 | 9156 |
| EX01 | SL 0101-1           | 0.040492 | 0.601897 | 9156 |
| EX01 | SN-38               | 0.035933 | 0.443731 | 9156 |
| EX01 | SNX-2112            | -0.08919 | 0.013886 | 9156 |
| EX01 | STF-62247           | -0.05392 | 0.18465  | 9156 |
| EX01 | Salubrinal          | -0.00724 | 0.950053 | 9156 |
| EX01 | Saracatinib         | 0.028599 | 0.761962 | 9156 |
| EX01 | Shikonin            | -0.01679 | 0.792984 | 9156 |
| EX01 | Sorafenib           | 0.028942 | 0.823316 | 9156 |
| EX01 | Sunitinib           | -0.02363 | 0.793927 | 9156 |
| EX01 | TO901317            | -0.06636 | 0.099632 | 9156 |
| EX01 | TAE684              | 0.016208 | 0.918327 | 9156 |
| EX01 | TAK-715             | -0.12845 | 0.000285 | 9156 |
| EX01 | TG101348            | -0.14711 | 2.45E-05 | 9156 |
| EX01 | TGX221              | 0.203932 | 0.000486 | 9156 |
| EX01 | THZ-2-102-1         | -0.16086 | 4.6E-06  | 9156 |
| EX01 | THZ-2-49            | -0.09924 | 0.006384 | 9156 |
| EX01 | TL-1-85             | -0.13389 | 0.000143 | 9156 |
| EX01 | TL-2-105            | -0.13051 | 0.00028  | 9156 |
| EX01 | TPCA-1              | -0.18877 | 3.56E-08 | 9156 |
| EX01 | TW 37               | -0.05391 | 0.235837 | 9156 |
| EX01 | Talazoparib         | -0.01671 | 0.749309 | 9156 |
| EX01 | Tamoxifen           | 0.071956 | 0.439415 | 9156 |
| EX01 | Temozolomide        | 0.024317 | 0.76604  | 9156 |
| EX01 | Temsirolimus        | 0.010206 | 0.86776  | 9156 |
| EX01 | Thapsigargin        | 0.03028  | 0.673224 | 9156 |
| EX01 | Tipifarnib          | 0.052784 | 0.394784 | 9156 |
| EX01 | Tivozanib           | -0.02948 | 0.643025 | 9156 |
| EX01 | Trametinib          | 0.26486  | 1.65E-14 | 9156 |
| EX01 | Tubastatin A        | -0.12302 | 0.000474 | 9156 |
| EX01 | UNC0638             | -0.13129 | 0.000136 | 9156 |
| EX01 | UNC1215             | 0.0737   | 0.11441  | 9156 |
| EX01 | VNLG/124            | -0.05348 | 0.198273 | 9156 |
| EX01 | VX-11e              | 0.075849 | 0.084884 | 9156 |
| EX01 | VX-680              | -0.05988 | 0.528757 | 9156 |
| EX01 | VX-702              | -0.0218  | 0.933016 | 9156 |
| EX01 | Veliparib           | 0.019751 | 0.806517 | 9156 |
| EX01 | Vinblastine         | -0.01307 | 0.806137 | 9156 |
| EX01 | Vinorelbine         | 0.00014  | 0.998867 | 9156 |
| EX01 | Vorinostat          | -0.22048 | 4.97E-10 | 9156 |
| EX01 | WH-4-023            | 0.110859 | 0.118896 | 9156 |
| EX01 | WZ-1-84             | 0.098805 | 0.17811  | 9156 |
| EX01 | WZ3105              | -0.16107 | 3.31E-06 | 9156 |
| EX01 | XAV939              | 0.092967 | 0.014789 | 9156 |
| EX01 | XL-184              | 0.01273  | 0.822218 | 9156 |



|       |                    |          |          |      |
|-------|--------------------|----------|----------|------|
| EX01  | XMD11-85h          | 0.032283 | 0.86628  | 9156 |
| EX01  | XMD13-2            | -0.12742 | 0.000296 | 9156 |
| EX01  | XMD14-99           | -0.0696  | 0.066203 | 9156 |
| EX01  | XMD15-27           | -0.0474  | 0.316493 | 9156 |
| EX01  | XMD8-85            | 0.069419 | 0.396889 | 9156 |
| EX01  | XMD8-92            | 0.022778 | 0.86601  | 9156 |
| EX01  | Y-39983            | -0.13075 | 0.000274 | 9156 |
| EX01  | YK 4-279           | 0.06465  | 0.200146 | 9156 |
| EX01  | YM155              | -0.04404 | 0.398876 | 9156 |
| EX01  | YM201636           | -0.17635 | 4.72E-07 | 9156 |
| EX01  | Z-LLN1e-CHO        | 0.077103 | 0.291813 | 9156 |
| EX01  | ZG-10              | -0.07024 | 0.281155 | 9156 |
| EX01  | ZM-447439          | -0.09579 | 0.024134 | 9156 |
| EX01  | ZSTK474            | -0.12845 | 0.000294 | 9156 |
| EX01  | Zibotentan         | -0.02039 | 0.951546 | 9156 |
| EX01  | piperlongumine     | 0.097919 | 0.014349 | 9156 |
| EX01  | rTRAIL             | 0.026557 | 0.743958 | 9156 |
| EX01  | selumetinib        | 0.218445 | 1.64E-10 | 9156 |
| KIF11 | (5Z)-7-oxozeaenol  | 0.1212   | 0.00127  | 3832 |
| KIF11 | 17-AAG             | 0.194839 | 5.51E-08 | 3832 |
| KIF11 | 5-Fluorouracil     | -0.07186 | 0.050752 | 3832 |
| KIF11 | 681640             | 8.3E-05  | 0.999077 | 3832 |
| KIF11 | A-443654           | -0.10501 | 0.454239 | 3832 |
| KIF11 | A-770041           | -0.07631 | 0.33127  | 3832 |
| KIF11 | AC220              | -0.03816 | 0.443804 | 3832 |
| KIF11 | AG-014699          | 0.040735 | 0.355235 | 3832 |
| KIF11 | AICAR              | -0.15861 | 2.55E-05 | 3832 |
| KIF11 | AKT inhibitor VIII | 0.089029 | 0.036042 | 3832 |
| KIF11 | AMG-706            | 0.063138 | 0.251119 | 3832 |
| KIF11 | AP-24534           | -0.10008 | 0.010509 | 3832 |
| KIF11 | AR-42              | -0.1633  | 2.83E-06 | 3832 |
| KIF11 | AS601245           | 0.06725  | 0.182231 | 3832 |
| KIF11 | AS605240           | -0.04318 | 0.329973 | 3832 |
| KIF11 | AT-7519            | -0.17451 | 4.58E-07 | 3832 |
| KIF11 | ATRA               | -0.05918 | 0.213506 | 3832 |
| KIF11 | AUY922             | 0.020203 | 0.742816 | 3832 |
| KIF11 | AZ628              | 0.127697 | 0.05716  | 3832 |
| KIF11 | AZD6482            | 0.01606  | 0.78212  | 3832 |
| KIF11 | AZD7762            | -0.19173 | 2.54E-07 | 3832 |
| KIF11 | AZD8055            | -0.13752 | 0.000284 | 3832 |
| KIF11 | Afatinib           | 0.118387 | 0.000929 | 3832 |
| KIF11 | Axitinib           | -0.075   | 0.116762 | 3832 |
| KIF11 | BAY 61-3606        | -0.06932 | 0.087199 | 3832 |
| KIF11 | BEZ235             | -0.01056 | 0.861065 | 3832 |
| KIF11 | BHG712             | -0.11453 | 0.001282 | 3832 |
| KIF11 | BI-2536            | -0.16424 | 0.054445 | 3832 |
| KIF11 | BIRB 0796          | 0.045407 | 0.383176 | 3832 |
| KIF11 | BIX02189           | -0.1493  | 2.26E-05 | 3832 |
| KIF11 | BMS-509744         | -0.02184 | 0.841996 | 3832 |
| KIF11 | BMS-536924         | -0.0315  | 0.677069 | 3832 |

|       |                   |          |          |      |
|-------|-------------------|----------|----------|------|
| KIF11 | BMS-708163        | 0.101082 | 0.00919  | 3832 |
| KIF11 | BMS-754807        | 0.018752 | 0.77131  | 3832 |
| KIF11 | BMS345541         | -0.18639 | 6.89E-08 | 3832 |
| KIF11 | BX-795            | -0.12555 | 0.001912 | 3832 |
| KIF11 | BX-912            | -0.22658 | 2.49E-11 | 3832 |
| KIF11 | Belinostat        | -0.1329  | 0.000232 | 3832 |
| KIF11 | Bexarotene        | 0.019052 | 0.838614 | 3832 |
| KIF11 | Bicalutamide      | 0.018946 | 0.709209 | 3832 |
| KIF11 | Bleomycin         | 0.058193 | 0.26957  | 3832 |
| KIF11 | Bleomycin (50 uM) | 0.097645 | 0.006535 | 3832 |
| KIF11 | Bortezomib        | 0.009483 | 0.929625 | 3832 |
| KIF11 | Bosutinib         | -0.05966 | 0.233649 | 3832 |
| KIF11 | Bryostatins 1     | 0.080308 | 0.090569 | 3832 |
| KIF11 | CAL-101           | -0.13893 | 0.000111 | 3832 |
| KIF11 | CAY10603          | -0.16262 | 2.95E-06 | 3832 |
| KIF11 | CCT007093         | 0.090255 | 0.027572 | 3832 |
| KIF11 | CCT018159         | 0.006989 | 0.919656 | 3832 |
| KIF11 | CEP-701           | -0.12818 | 0.000832 | 3832 |
| KIF11 | CGP-082996        | -0.0483  | 0.633861 | 3832 |
| KIF11 | CGP-60474         | -0.05229 | 0.562536 | 3832 |
| KIF11 | CH5424802         | -0.01954 | 0.785782 | 3832 |
| KIF11 | CHIR-99021        | 0.027462 | 0.507218 | 3832 |
| KIF11 | CI-1040           | 0.138291 | 0.000428 | 3832 |
| KIF11 | CMK               | -0.0517  | 0.672193 | 3832 |
| KIF11 | CP466722          | -0.20578 | 1.93E-09 | 3832 |
| KIF11 | CP724714          | 0.050859 | 0.331439 | 3832 |
| KIF11 | CUDC-101          | -0.1516  | 2.01E-05 | 3832 |
| KIF11 | CX-5461           | -0.16619 | 2.25E-06 | 3832 |
| KIF11 | Camptothecin      | -0.1234  | 0.001854 | 3832 |
| KIF11 | Cetuximab         | 0.096534 | 0.013774 | 3832 |
| KIF11 | Cisplatin         | -0.02661 | 0.624402 | 3832 |
| KIF11 | Crizotinib        | -0.05773 | 0.693397 | 3832 |
| KIF11 | Cyclopamine       | -0.03896 | 0.750471 | 3832 |
| KIF11 | Cytarabine        | -0.07091 | 0.133483 | 3832 |
| KIF11 | DMOG              | -0.0947  | 0.021995 | 3832 |
| KIF11 | Dabrafenib        | 0.143169 | 0.000189 | 3832 |
| KIF11 | Dasatinib         | 0.01834  | 0.814425 | 3832 |
| KIF11 | Docetaxel         | 0.083546 | 0.025936 | 3832 |
| KIF11 | Doxorubicin       | -0.01476 | 0.852318 | 3832 |
| KIF11 | EHT 1864          | 0.045364 | 0.482634 | 3832 |
| KIF11 | EKB-569           | -0.07697 | 0.049497 | 3832 |
| KIF11 | EX-527            | -0.01415 | 0.916277 | 3832 |
| KIF11 | Elesclomol        | -0.06365 | 0.14516  | 3832 |
| KIF11 | Embelin           | 0.019161 | 0.791756 | 3832 |
| KIF11 | Epothilone B      | 0.015249 | 0.802694 | 3832 |
| KIF11 | Erlotinib         | 0.132236 | 0.053261 | 3832 |
| KIF11 | Etoposide         | -0.11648 | 0.005118 | 3832 |
| KIF11 | FH535             | 0.117635 | 0.004877 | 3832 |
| KIF11 | FK866             | -0.19869 | 1.07E-08 | 3832 |
| KIF11 | FMK               | -0.02941 | 0.69309  | 3832 |

|       |                    |          |          |      |
|-------|--------------------|----------|----------|------|
| KIF11 | FR-180204          | -0.01238 | 0.85295  | 3832 |
| KIF11 | FTI-277            | 0.169079 | 1.12E-05 | 3832 |
| KIF11 | Foretinib          | -0.14935 | 5.04E-05 | 3832 |
| KIF11 | GDC0449            | 0.008591 | 0.95433  | 3832 |
| KIF11 | GDC0941            | -0.08483 | 0.073073 | 3832 |
| KIF11 | GNF-2              | -0.02371 | 0.934879 | 3832 |
| KIF11 | GSK-650394         | -0.02839 | 0.728373 | 3832 |
| KIF11 | GSK1070916         | -0.22344 | 1.14E-10 | 3832 |
| KIF11 | GSK1904529A        | 0.065254 | 0.142991 | 3832 |
| KIF11 | GSK2126458         | -0.14552 | 4.86E-05 | 3832 |
| KIF11 | GSK269962A         | -0.01239 | 0.850104 | 3832 |
| KIF11 | GSK429286A         | -0.14711 | 7.55E-05 | 3832 |
| KIF11 | GSK690693          | -0.1865  | 9.12E-08 | 3832 |
| KIF11 | GW 441756          | -0.0427  | 0.813754 | 3832 |
| KIF11 | GW-2580            | -0.00721 | 0.994893 | 3832 |
| KIF11 | GW843682X          | -0.184   | 0.011526 | 3832 |
| KIF11 | Gefitinib          | 0.112212 | 0.004423 | 3832 |
| KIF11 | Gemcitabine        | -0.08653 | 0.054267 | 3832 |
| KIF11 | Genentech Cpd 10   | -0.17642 | 4.34E-07 | 3832 |
| KIF11 | HG-5-113-01        | -0.12013 | 0.055758 | 3832 |
| KIF11 | HG-5-88-01         | -0.02471 | 0.894445 | 3832 |
| KIF11 | HG-6-64-1          | -0.00836 | 0.890703 | 3832 |
| KIF11 | I-BET-762          | -0.20074 | 3.54E-09 | 3832 |
| KIF11 | IOX2               | 0.002906 | 0.973893 | 3832 |
| KIF11 | IPA-3              | -0.12893 | 0.000605 | 3832 |
| KIF11 | Imatinib           | -0.05539 | 0.72413  | 3832 |
| KIF11 | Ispinesib Mesylate | -0.12426 | 0.00049  | 3832 |
| KIF11 | JNJ-26854165       | 0.012411 | 0.847133 | 3832 |
| KIF11 | JNK Inhibitor VIII | 0.067372 | 0.109662 | 3832 |
| KIF11 | JNK-9L             | 0.013105 | 0.856248 | 3832 |
| KIF11 | JQ1                | -0.0297  | 0.515735 | 3832 |
| KIF11 | JQ12               | 0.007011 | 0.919821 | 3832 |
| KIF11 | JW-7-24-1          | -0.16693 | 1.47E-06 | 3832 |
| KIF11 | JW-7-52-1          | -0.03665 | 0.745369 | 3832 |
| KIF11 | KIN001-055         | 0.028125 | 0.694522 | 3832 |
| KIF11 | KIN001-102         | -0.17653 | 3E-07    | 3832 |
| KIF11 | KIN001-135         | 0.078957 | 0.415169 | 3832 |
| KIF11 | KIN001-236         | -0.1132  | 0.001723 | 3832 |
| KIF11 | KIN001-244         | -0.14692 | 3.42E-05 | 3832 |
| KIF11 | KIN001-260         | -0.12597 | 0.000386 | 3832 |
| KIF11 | KIN001-266         | -0.05102 | 0.281696 | 3832 |
| KIF11 | KIN001-270         | -0.137   | 0.000213 | 3832 |
| KIF11 | KU-55933           | -0.08965 | 0.076232 | 3832 |
| KIF11 | LAQ824             | -0.10207 | 0.007669 | 3832 |
| KIF11 | LFM-A13            | 0.058927 | 0.228607 | 3832 |
| KIF11 | LY317615           | -0.07112 | 0.091009 | 3832 |
| KIF11 | Lapatinib          | 0.17385  | 0.003335 | 3832 |
| KIF11 | Lenalidomide       | -0.08254 | 0.161554 | 3832 |
| KIF11 | Linifanib          | -0.02135 | 0.725158 | 3832 |
| KIF11 | Lisitinib          | 0.007625 | 0.93396  | 3832 |

|       |                    |          |          |      |
|-------|--------------------|----------|----------|------|
| KIF11 | MG-132             | 0.036967 | 0.7149   | 3832 |
| KIF11 | MK-2206            | -0.12777 | 0.004392 | 3832 |
| KIF11 | MLN4924            | 0.06482  | 0.234013 | 3832 |
| KIF11 | MP470              | -0.07604 | 0.070958 | 3832 |
| KIF11 | MPS-1-IN-1         | -0.1137  | 0.001852 | 3832 |
| KIF11 | MS-275             | -0.16643 | 0.016438 | 3832 |
| KIF11 | Masitinib          | -0.09748 | 0.008054 | 3832 |
| KIF11 | Methotrexate       | -0.17572 | 9.55E-07 | 3832 |
| KIF11 | Midostaurin        | 0.01087  | 0.838874 | 3832 |
| KIF11 | Mitomycin C        | -0.0595  | 0.224716 | 3832 |
| KIF11 | NG-25              | -0.1592  | 4.74E-06 | 3832 |
| KIF11 | NPK76-II-72-1      | -0.26457 | 2.74E-15 | 3832 |
| KIF11 | NSC-207895         | -0.17044 | 1.29E-05 | 3832 |
| KIF11 | NSC-87877          | 0.133587 | 0.007691 | 3832 |
| KIF11 | NU-7441            | -0.02831 | 0.728308 | 3832 |
| KIF11 | Navitoclax         | -0.25002 | 1.35E-12 | 3832 |
| KIF11 | Nilotinib          | -0.05789 | 0.241742 | 3832 |
| KIF11 | Nutlin-3a (-)      | 0.032218 | 0.533579 | 3832 |
| KIF11 | OSI-027            | -0.16406 | 2.77E-06 | 3832 |
| KIF11 | OSI-930            | -0.07542 | 0.049262 | 3832 |
| KIF11 | OSU-03012          | -0.05118 | 0.297062 | 3832 |
| KIF11 | Obatoclax Mesylate | 0.004327 | 0.944967 | 3832 |
| KIF11 | Olaparib           | 0.02074  | 0.671067 | 3832 |
| KIF11 | PAC-1              | -0.0973  | 0.01485  | 3832 |
| KIF11 | PD-0325901         | 0.210592 | 1.14E-08 | 3832 |
| KIF11 | PD-0332991         | -0.02296 | 0.722642 | 3832 |
| KIF11 | PD-173074          | -0.03813 | 0.803092 | 3832 |
| KIF11 | PF-4708671         | 0.073525 | 0.387433 | 3832 |
| KIF11 | PF-562271          | 0.0123   | 0.858693 | 3832 |
| KIF11 | PFI-1              | 9.43E-06 | 0.999827 | 3832 |
| KIF11 | PHA-665752         | 0.065402 | 0.646797 | 3832 |
| KIF11 | PHA-793887         | -0.18057 | 1.34E-07 | 3832 |
| KIF11 | PI-103             | -0.16632 | 1.98E-06 | 3832 |
| KIF11 | PIK-93             | -0.22134 | 7.08E-11 | 3832 |
| KIF11 | PLX4720            | 0.151805 | 3.37E-05 | 3832 |
| KIF11 | Paclitaxel         | -0.05003 | 0.668448 | 3832 |
| KIF11 | Parthenolide       | -0.06351 | 0.535393 | 3832 |
| KIF11 | Pazopanib          | 0.014235 | 0.829906 | 3832 |
| KIF11 | Phenformin         | -0.09144 | 0.012787 | 3832 |
| KIF11 | Pyrimethamine      | -0.00776 | 0.961528 | 3832 |
| KIF11 | QL-VIII-58         | 0.011881 | 0.911336 | 3832 |
| KIF11 | QL-X-138           | -0.18775 | 7.69E-08 | 3832 |
| KIF11 | QL-XI-92           | -0.18131 | 1.8E-07  | 3832 |
| KIF11 | QL-XII-47          | -0.11724 | 0.001878 | 3832 |
| KIF11 | QL-XII-61          | -0.17538 | 0.001741 | 3832 |
| KIF11 | QS11               | -0.06831 | 0.225902 | 3832 |
| KIF11 | RDEA119            | 0.230607 | 1.19E-11 | 3832 |
| KIF11 | RO-3306            | 0.047737 | 0.265299 | 3832 |
| KIF11 | Rapamycin          | -0.07976 | 0.464856 | 3832 |
| KIF11 | Roscovitine        | 0.065492 | 0.682476 | 3832 |

|       |                     |          |          |      |
|-------|---------------------|----------|----------|------|
| KIF11 | Ruxolitinib         | -0.05118 | 0.302382 | 3832 |
| KIF11 | S-Trytyl-L-cysteine | -0.09835 | 0.193812 | 3832 |
| KIF11 | SB 216763           | 0.039746 | 0.438419 | 3832 |
| KIF11 | SB 505124           | 0.045706 | 0.529484 | 3832 |
| KIF11 | SB52334             | 0.008269 | 0.895592 | 3832 |
| KIF11 | SB590885            | 0.160359 | 7.33E-05 | 3832 |
| KIF11 | SGC0946             | 0.051638 | 0.317236 | 3832 |
| KIF11 | SL 0101-1           | 0.081037 | 0.268103 | 3832 |
| KIF11 | SN-38               | -0.03543 | 0.450997 | 3832 |
| KIF11 | SNX-2112            | -0.16503 | 2.45E-06 | 3832 |
| KIF11 | STF-62247           | -0.09276 | 0.017311 | 3832 |
| KIF11 | Salubrinal          | -0.06486 | 0.447009 | 3832 |
| KIF11 | Saracatinib         | -0.05355 | 0.535949 | 3832 |
| KIF11 | Shikonin            | -0.07768 | 0.107547 | 3832 |
| KIF11 | Sorafenib           | -0.01006 | 0.944078 | 3832 |
| KIF11 | Sunitinib           | -0.10044 | 0.147755 | 3832 |
| KIF11 | T0901317            | -0.13436 | 0.000375 | 3832 |
| KIF11 | TAE684              | -0.03008 | 0.824879 | 3832 |
| KIF11 | TAK-715             | -0.1221  | 0.000583 | 3832 |
| KIF11 | TG101348            | -0.19233 | 2.21E-08 | 3832 |
| KIF11 | TGX221              | 0.123575 | 0.045955 | 3832 |
| KIF11 | THZ-2-102-1         | -0.17607 | 4.67E-07 | 3832 |
| KIF11 | THZ-2-49            | -0.06543 | 0.079136 | 3832 |
| KIF11 | TL-1-85             | -0.14424 | 3.93E-05 | 3832 |
| KIF11 | TL-2-105            | -0.12667 | 0.000435 | 3832 |
| KIF11 | TPCA-1              | -0.20558 | 1.65E-09 | 3832 |
| KIF11 | TW 37               | -0.087   | 0.036407 | 3832 |
| KIF11 | Talazoparib         | -0.0217  | 0.668762 | 3832 |
| KIF11 | Tamoxifen           | -0.01635 | 0.912377 | 3832 |
| KIF11 | Temozolomide        | 0.016893 | 0.849269 | 3832 |
| KIF11 | Temsirolimus        | -0.10127 | 0.018164 | 3832 |
| KIF11 | Thapsigargin        | 0.015248 | 0.857027 | 3832 |
| KIF11 | Tipifarnib          | 0.019586 | 0.806928 | 3832 |
| KIF11 | Tivozanib           | -0.05638 | 0.297009 | 3832 |
| KIF11 | Trametinib          | 0.273436 | 0        | 3832 |
| KIF11 | Tubastatin A        | -0.15126 | 1.42E-05 | 3832 |
| KIF11 | UNC0638             | -0.11238 | 0.001211 | 3832 |
| KIF11 | UNC1215             | 0.077895 | 0.092808 | 3832 |
| KIF11 | VNLG/124            | -0.05946 | 0.147399 | 3832 |
| KIF11 | VX-11e              | 0.054333 | 0.243034 | 3832 |
| KIF11 | VX-680              | -0.14399 | 0.064655 | 3832 |
| KIF11 | VX-702              | -0.02456 | 0.921524 | 3832 |
| KIF11 | Veliparib           | 0.003577 | 0.970558 | 3832 |
| KIF11 | Vinblastine         | -0.08044 | 0.055867 | 3832 |
| KIF11 | Vinorelbine         | -0.05286 | 0.320784 | 3832 |
| KIF11 | Vorinostat          | -0.24015 | 1.01E-11 | 3832 |
| KIF11 | WH-4-023            | 0.027675 | 0.759817 | 3832 |
| KIF11 | WZ-1-84             | 0.031321 | 0.721403 | 3832 |
| KIF11 | WZ3105              | -0.15731 | 5.72E-06 | 3832 |
| KIF11 | XAV939              | 0.045744 | 0.253525 | 3832 |

|       |                    |          |          |       |
|-------|--------------------|----------|----------|-------|
| KIF11 | XL-184             | -0.07155 | 0.102566 | 3832  |
| KIF11 | XMD11-85h          | -0.01146 | 0.964062 | 3832  |
| KIF11 | XMD13-2            | -0.15799 | 5.73E-06 | 3832  |
| KIF11 | XMD14-99           | -0.0651  | 0.087756 | 3832  |
| KIF11 | XMD15-27           | -0.09153 | 0.031613 | 3832  |
| KIF11 | XMD8-85            | -0.02498 | 0.802484 | 3832  |
| KIF11 | XMD8-92            | -0.06628 | 0.51877  | 3832  |
| KIF11 | Y-39983            | -0.18602 | 1.25E-07 | 3832  |
| KIF11 | YK 4-279           | 0.022852 | 0.713653 | 3832  |
| KIF11 | YM155              | -0.08466 | 0.063362 | 3832  |
| KIF11 | YM201636           | -0.14852 | 2.65E-05 | 3832  |
| KIF11 | Z-LLN1e-CHO        | -0.00505 | 0.956894 | 3832  |
| KIF11 | ZG-10              | -0.13958 | 0.015967 | 3832  |
| KIF11 | ZM-447439          | -0.14074 | 0.000529 | 3832  |
| KIF11 | ZSTK474            | -0.16887 | 1.39E-06 | 3832  |
| KIF11 | Zibotentan         | -0.00728 | 0.988489 | 3832  |
| KIF11 | piperlongumine     | 0.022595 | 0.646484 | 3832  |
| KIF11 | rTRAIL             | 0.043841 | 0.548462 | 3832  |
| KIF11 | selumetinib        | 0.242821 | 8.69E-13 | 3832  |
| KIF15 | (5Z)-7-Oxozeaenol  | 0.101235 | 0.008149 | 56992 |
| KIF15 | 17-AAG             | 0.218268 | 9.36E-10 | 56992 |
| KIF15 | 5-Fluorouracil     | -0.1767  | 4.55E-07 | 56992 |
| KIF15 | 681640             | 0.026795 | 0.682    | 56992 |
| KIF15 | A-443654           | -0.05727 | 0.733808 | 56992 |
| KIF15 | A-770041           | 0.02994  | 0.7528   | 56992 |
| KIF15 | AC220              | -0.07924 | 0.066771 | 56992 |
| KIF15 | AG-014699          | 0.032746 | 0.470468 | 56992 |
| KIF15 | AICAR              | -0.15682 | 3.16E-05 | 56992 |
| KIF15 | AKT inhibitor VIII | 0.123149 | 0.002812 | 56992 |
| KIF15 | AMG-706            | 0.088276 | 0.082127 | 56992 |
| KIF15 | AP-24534           | -0.13863 | 0.000265 | 56992 |
| KIF15 | AR-42              | -0.22685 | 3.82E-11 | 56992 |
| KIF15 | AS601245           | 0.095578 | 0.039155 | 56992 |
| KIF15 | AS605240           | -0.06198 | 0.140184 | 56992 |
| KIF15 | AT-7519            | -0.23685 | 3.52E-12 | 56992 |
| KIF15 | ATRA               | -0.11422 | 0.00705  | 56992 |
| KIF15 | AUY922             | 0.01366  | 0.836377 | 56992 |
| KIF15 | AZ628              | 0.102044 | 0.145717 | 56992 |
| KIF15 | AZD6482            | 0.045651 | 0.327696 | 56992 |
| KIF15 | AZD7762            | -0.22194 | 1.65E-09 | 56992 |
| KIF15 | AZD8055            | -0.1535  | 4.57E-05 | 56992 |
| KIF15 | Afatinib           | 0.211527 | 6.79E-10 | 56992 |
| KIF15 | Axitinib           | -0.11805 | 0.007798 | 56992 |
| KIF15 | BAY 61-3606        | -0.09915 | 0.011635 | 56992 |
| KIF15 | BEZ235             | 0.016531 | 0.773965 | 56992 |
| KIF15 | BHG712             | -0.1873  | 6.36E-08 | 56992 |
| KIF15 | BI-2536            | -0.1682  | 0.049014 | 56992 |
| KIF15 | BIRB 0796          | 0.103237 | 0.026117 | 56992 |
| KIF15 | BIX02189           | -0.21229 | 8.05E-10 | 56992 |
| KIF15 | BMS-509744         | 0.011558 | 0.920399 | 56992 |

|       |                   |          |          |       |
|-------|-------------------|----------|----------|-------|
| KIF15 | BMS-536924        | -0.01112 | 0.90892  | 56992 |
| KIF15 | BMS-708163        | 0.122044 | 0.001483 | 56992 |
| KIF15 | BMS-754807        | 0.019426 | 0.761622 | 56992 |
| KIF15 | BMS345541         | -0.25247 | 1.18E-13 | 56992 |
| KIF15 | BX-795            | -0.16145 | 3.98E-05 | 56992 |
| KIF15 | BX-912            | -0.3005  | 1.85E-19 | 56992 |
| KIF15 | Belinostat        | -0.1972  | 2.42E-08 | 56992 |
| KIF15 | Bexarotene        | 0.009966 | 0.92788  | 56992 |
| KIF15 | Bicalutamide      | 0.097307 | 0.018425 | 56992 |
| KIF15 | Bleomycin         | 0.032494 | 0.58861  | 56992 |
| KIF15 | Bleomycin (50 uM) | 0.123022 | 0.000536 | 56992 |
| KIF15 | Bortezomib        | 0.016565 | 0.873037 | 56992 |
| KIF15 | Bosutinib         | -0.05043 | 0.335371 | 56992 |
| KIF15 | Bryostatins 1     | 0.109461 | 0.016459 | 56992 |
| KIF15 | CAL-101           | -0.18276 | 2.23E-07 | 56992 |
| KIF15 | CAY10603          | -0.23254 | 1.02E-11 | 56992 |
| KIF15 | CCT007093         | 0.148121 | 0.000183 | 56992 |
| KIF15 | CCT018159         | -0.01239 | 0.84947  | 56992 |
| KIF15 | CEP-701           | -0.17397 | 3.42E-06 | 56992 |
| KIF15 | CGP-082996        | 0.019328 | 0.875855 | 56992 |
| KIF15 | CGP-60474         | -0.00746 | 0.950247 | 56992 |
| KIF15 | CH5424802         | -0.07512 | 0.135237 | 56992 |
| KIF15 | CHIR-99021        | 0.079525 | 0.034308 | 56992 |
| KIF15 | CI-1040           | 0.121513 | 0.00226  | 56992 |
| KIF15 | CMK               | -0.00611 | 0.968588 | 56992 |
| KIF15 | CP466722          | -0.2639  | 5.79E-15 | 56992 |
| KIF15 | CP724714          | 0.090913 | 0.045114 | 56992 |
| KIF15 | CUDC-101          | -0.19923 | 1.26E-08 | 56992 |
| KIF15 | CX-5461           | -0.26105 | 2.62E-14 | 56992 |
| KIF15 | Camptothecin      | -0.1734  | 7.05E-06 | 56992 |
| KIF15 | Cetuximab         | 0.179406 | 1.5E-06  | 56992 |
| KIF15 | Cisplatin         | -0.03499 | 0.501289 | 56992 |
| KIF15 | Crizotinib        | -0.07872 | 0.527778 | 56992 |
| KIF15 | Cyclopamine       | 0.004198 | 0.976891 | 56992 |
| KIF15 | Cytarabine        | -0.09946 | 0.025057 | 56992 |
| KIF15 | DMOG              | -0.10582 | 0.009391 | 56992 |
| KIF15 | Dabrafenib        | 0.125738 | 0.001213 | 56992 |
| KIF15 | Dasatinib         | 0.104685 | 0.105206 | 56992 |
| KIF15 | Docetaxel         | 0.110752 | 0.002803 | 56992 |
| KIF15 | Doxorubicin       | -0.0133  | 0.869691 | 56992 |
| KIF15 | EHT 1864          | 0.063162 | 0.290838 | 56992 |
| KIF15 | EKB-569           | -0.10831 | 0.004319 | 56992 |
| KIF15 | EX-527            | 0.001064 | 0.99399  | 56992 |
| KIF15 | Elesclomol        | -0.01441 | 0.781698 | 56992 |
| KIF15 | Embelin           | 0.011954 | 0.879649 | 56992 |
| KIF15 | Epothilone B      | 0.034089 | 0.528123 | 56992 |
| KIF15 | Erlotinib         | 0.20391  | 0.001414 | 56992 |
| KIF15 | Etoposide         | -0.14868 | 0.000253 | 56992 |
| KIF15 | FH535             | 0.109011 | 0.009848 | 56992 |
| KIF15 | FK866             | -0.27501 | 7.88E-16 | 56992 |

|       |                    |          |          |       |
|-------|--------------------|----------|----------|-------|
| KIF15 | FMK                | -0.04257 | 0.536073 | 56992 |
| KIF15 | FR-180204          | -0.06159 | 0.20693  | 56992 |
| KIF15 | FTI-277            | 0.189088 | 7.21E-07 | 56992 |
| KIF15 | Foretinib          | -0.16711 | 4.84E-06 | 56992 |
| KIF15 | GDC0449            | -0.02384 | 0.839154 | 56992 |
| KIF15 | GDC0941            | -0.0552  | 0.296833 | 56992 |
| KIF15 | GNF-2              | -0.02543 | 0.930464 | 56992 |
| KIF15 | GSK-650394         | -0.03568 | 0.640796 | 56992 |
| KIF15 | GSK1070916         | -0.31527 | 1.07E-20 | 56992 |
| KIF15 | GSK1904529A        | 0.126009 | 0.002442 | 56992 |
| KIF15 | GSK2126458         | -0.18805 | 9.35E-08 | 56992 |
| KIF15 | GSK269962A         | -0.02649 | 0.649848 | 56992 |
| KIF15 | GSK429286A         | -0.19943 | 4.07E-08 | 56992 |
| KIF15 | GSK690693          | -0.2333  | 1.28E-11 | 56992 |
| KIF15 | GW 441756          | -0.02231 | 0.929412 | 56992 |
| KIF15 | GW-2580            | 0.006827 | 0.994893 | 56992 |
| KIF15 | GW843682X          | -0.19476 | 0.007252 | 56992 |
| KIF15 | Gefitinib          | 0.195264 | 1.89E-07 | 56992 |
| KIF15 | Gemcitabine        | -0.10086 | 0.021472 | 56992 |
| KIF15 | Genentech Cpd 10   | -0.25096 | 2.27E-13 | 56992 |
| KIF15 | HG-5-113-01        | -0.15861 | 0.008165 | 56992 |
| KIF15 | HG-5-88-01         | -0.0337  | 0.846066 | 56992 |
| KIF15 | HG-6-64-1          | -0.01952 | 0.728135 | 56992 |
| KIF15 | I-BET-762          | -0.26903 | 9.27E-16 | 56992 |
| KIF15 | IOX2               | 0.052725 | 0.346861 | 56992 |
| KIF15 | IPA-3              | -0.14362 | 0.00012  | 56992 |
| KIF15 | Imatinib           | -0.08449 | 0.488468 | 56992 |
| KIF15 | Ispinesib Mesylate | -0.18345 | 1.4E-07  | 56992 |
| KIF15 | JNJ-26854165       | 0.059327 | 0.223887 | 56992 |
| KIF15 | JNK Inhibitor VIII | 0.135037 | 0.000651 | 56992 |
| KIF15 | JNK-9L             | -0.01279 | 0.859963 | 56992 |
| KIF15 | JQ1                | -0.0357  | 0.426526 | 56992 |
| KIF15 | JQ12               | -0.00848 | 0.902805 | 56992 |
| KIF15 | JW-7-24-1          | -0.21412 | 3.85E-10 | 56992 |
| KIF15 | JW-7-52-1          | -0.02138 | 0.866158 | 56992 |
| KIF15 | KIN001-055         | 0.049922 | 0.403179 | 56992 |
| KIF15 | KIN001-102         | -0.24926 | 1.86E-13 | 56992 |
| KIF15 | KIN001-135         | 0.14007  | 0.102464 | 56992 |
| KIF15 | KIN001-236         | -0.18889 | 6.83E-08 | 56992 |
| KIF15 | KIN001-244         | -0.2129  | 8.87E-10 | 56992 |
| KIF15 | KIN001-260         | -0.17942 | 2.62E-07 | 56992 |
| KIF15 | KIN001-266         | -0.08628 | 0.050374 | 56992 |
| KIF15 | KIN001-270         | -0.16164 | 1.01E-05 | 56992 |
| KIF15 | KU-55933           | -0.09838 | 0.047271 | 56992 |
| KIF15 | LAQ824             | -0.13863 | 0.000211 | 56992 |
| KIF15 | LFM-A13            | 0.116001 | 0.00978  | 56992 |
| KIF15 | LY317615           | -0.09303 | 0.022162 | 56992 |
| KIF15 | Lapatinib          | 0.233957 | 4.27E-05 | 56992 |
| KIF15 | Lenalidomide       | -0.03047 | 0.719319 | 56992 |
| KIF15 | Linifanib          | -0.04507 | 0.383779 | 56992 |



|       |                    |          |          |       |
|-------|--------------------|----------|----------|-------|
| KIF15 | Lisitinib          | 0.020265 | 0.791814 | 56992 |
| KIF15 | MG-132             | 0.044917 | 0.642838 | 56992 |
| KIF15 | MK-2206            | -0.0917  | 0.050711 | 56992 |
| KIF15 | MLN4924            | 0.040072 | 0.497762 | 56992 |
| KIF15 | MP470              | -0.07883 | 0.060882 | 56992 |
| KIF15 | MPS-1-IN-1         | -0.18532 | 1.76E-07 | 56992 |
| KIF15 | MS-275             | -0.17383 | 0.012058 | 56992 |
| KIF15 | Masitinib          | -0.16527 | 3.4E-06  | 56992 |
| KIF15 | Methotrexate       | -0.24978 | 1.28E-12 | 56992 |
| KIF15 | Midostaurin        | 0.048678 | 0.281641 | 56992 |
| KIF15 | Mitomycin C        | -0.07279 | 0.123206 | 56992 |
| KIF15 | NG-25              | -0.2144  | 3.81E-10 | 56992 |
| KIF15 | NPK76-II-72-1      | -0.36019 | 2.25E-28 | 56992 |
| KIF15 | NSC-207895         | -0.15581 | 7.07E-05 | 56992 |
| KIF15 | NSC-87877          | 0.113385 | 0.024213 | 56992 |
| KIF15 | NU-7441            | -0.03819 | 0.611799 | 56992 |
| KIF15 | Navitoclax         | -0.3154  | 8.83E-20 | 56992 |
| KIF15 | Nilotinib          | -0.10934 | 0.012849 | 56992 |
| KIF15 | Nutlin-3a (-)      | 0.042446 | 0.390617 | 56992 |
| KIF15 | OSI-027            | -0.21349 | 6.31E-10 | 56992 |
| KIF15 | OSI-930            | -0.13219 | 0.000318 | 56992 |
| KIF15 | OSU-03012          | -0.05697 | 0.2353   | 56992 |
| KIF15 | Obatoclax Mesylate | -0.03568 | 0.472578 | 56992 |
| KIF15 | Olaparib           | -0.01786 | 0.719583 | 56992 |
| KIF15 | PAC-1              | -0.14583 | 0.000152 | 56992 |
| KIF15 | PD-0325901         | 0.222417 | 1.49E-09 | 56992 |
| KIF15 | PD-0332991         | -0.04809 | 0.382963 | 56992 |
| KIF15 | PD-173074          | -0.05196 | 0.700153 | 56992 |
| KIF15 | PF-4708671         | 0.071488 | 0.400451 | 56992 |
| KIF15 | PF-562271          | 0.015348 | 0.817749 | 56992 |
| KIF15 | PFI-1              | 0.008001 | 0.897049 | 56992 |
| KIF15 | PHA-665752         | 0.070181 | 0.616371 | 56992 |
| KIF15 | PHA-793887         | -0.24668 | 2.43E-13 | 56992 |
| KIF15 | PI-103             | -0.22137 | 1.29E-10 | 56992 |
| KIF15 | PIK-93             | -0.29811 | 3.42E-19 | 56992 |
| KIF15 | PLX4720            | 0.130884 | 0.000443 | 56992 |
| KIF15 | Paclitaxel         | -0.05583 | 0.6259   | 56992 |
| KIF15 | Parthenolide       | -0.0704  | 0.480527 | 56992 |
| KIF15 | Pazopanib          | 0.045095 | 0.41606  | 56992 |
| KIF15 | Phenformin         | -0.15373 | 1.76E-05 | 56992 |
| KIF15 | Pyrimethamine      | -0.07392 | 0.508657 | 56992 |
| KIF15 | QL-VIII-58         | -0.03483 | 0.68251  | 56992 |
| KIF15 | QL-X-138           | -0.23901 | 4.09E-12 | 56992 |
| KIF15 | QL-XI-92           | -0.23259 | 1.07E-11 | 56992 |
| KIF15 | QL-XII-47          | -0.14842 | 6.18E-05 | 56992 |
| KIF15 | QL-XII-61          | -0.18923 | 0.000642 | 56992 |
| KIF15 | QS11               | -0.08255 | 0.131845 | 56992 |
| KIF15 | RDEA119            | 0.239484 | 1.69E-12 | 56992 |
| KIF15 | RO-3306            | 0.096488 | 0.017688 | 56992 |
| KIF15 | Rapamycin          | -0.03946 | 0.770783 | 56992 |

|       |                     |          |          |       |
|-------|---------------------|----------|----------|-------|
| KIF15 | Roscovitine         | 0.073699 | 0.634357 | 56992 |
| KIF15 | Ruxolitinib         | -0.07698 | 0.090993 | 56992 |
| KIF15 | S-Trityl-L-cysteine | -0.10511 | 0.159806 | 56992 |
| KIF15 | SB 216763           | 0.101404 | 0.029141 | 56992 |
| KIF15 | SB 505124           | 0.087018 | 0.151862 | 56992 |
| KIF15 | SB52334             | -0.01055 | 0.863076 | 56992 |
| KIF15 | SB590885            | 0.1388   | 0.000868 | 56992 |
| KIF15 | SGC0946             | 0.094526 | 0.036534 | 56992 |
| KIF15 | SL 0101-1           | 0.058806 | 0.427287 | 56992 |
| KIF15 | SN-38               | -0.09209 | 0.022103 | 56992 |
| KIF15 | SNX-2112            | -0.23781 | 4.04E-12 | 56992 |
| KIF15 | STF-62247           | -0.11804 | 0.002033 | 56992 |
| KIF15 | Salubrinal          | -0.04211 | 0.647419 | 56992 |
| KIF15 | Saracatinib         | 0.044487 | 0.618561 | 56992 |
| KIF15 | Shikonin            | -0.07517 | 0.121371 | 56992 |
| KIF15 | Sorafenib           | -0.01434 | 0.918215 | 56992 |
| KIF15 | Sunitinib           | -0.09191 | 0.194149 | 56992 |
| KIF15 | T0901317            | -0.13936 | 0.000212 | 56992 |
| KIF15 | TAE684              | -0.01015 | 0.950555 | 56992 |
| KIF15 | TAK-715             | -0.18189 | 1.78E-07 | 56992 |
| KIF15 | TG101348            | -0.25234 | 9.06E-14 | 56992 |
| KIF15 | TGX221              | 0.187166 | 0.001522 | 56992 |
| KIF15 | THZ-2-102-1         | -0.26444 | 1.04E-14 | 56992 |
| KIF15 | THZ-2-49            | -0.18348 | 2E-07    | 56992 |
| KIF15 | TL-1-85             | -0.20836 | 1.33E-09 | 56992 |
| KIF15 | TL-2-105            | -0.20329 | 6.18E-09 | 56992 |
| KIF15 | TPCA-1              | -0.27913 | 7.91E-17 | 56992 |
| KIF15 | TW 37               | -0.0561  | 0.213866 | 56992 |
| KIF15 | Talazoparib         | -0.06324 | 0.149054 | 56992 |
| KIF15 | Tamoxifen           | 0.061386 | 0.547227 | 56992 |
| KIF15 | Temozolomide        | 0.006576 | 0.949344 | 56992 |
| KIF15 | Temsirolimus        | -0.07313 | 0.108871 | 56992 |
| KIF15 | Thapsigargin        | -0.01687 | 0.838782 | 56992 |
| KIF15 | Tipifarnib          | -0.01285 | 0.88229  | 56992 |
| KIF15 | Tivozanib           | -0.0849  | 0.078711 | 56992 |
| KIF15 | Trametinib          | 0.293503 | 0        | 56992 |
| KIF15 | Tubastatin A        | -0.22912 | 1.86E-11 | 56992 |
| KIF15 | UNC0638             | -0.18915 | 2.07E-08 | 56992 |
| KIF15 | UNC1215             | 0.136424 | 0.002077 | 56992 |
| KIF15 | VNLG/124            | -0.12012 | 0.001614 | 56992 |
| KIF15 | VX-11e              | 0.020157 | 0.715151 | 56992 |
| KIF15 | VX-680              | -0.17518 | 0.020261 | 56992 |
| KIF15 | VX-702              | 1.7E-05  | 0.999887 | 56992 |
| KIF15 | Veliparib           | 0.036961 | 0.600988 | 56992 |
| KIF15 | Vinblastine         | -0.11845 | 0.003248 | 56992 |
| KIF15 | Vinorelbine         | -0.06617 | 0.193612 | 56992 |
| KIF15 | Vorinostat          | -0.28611 | 2.57E-16 | 56992 |
| KIF15 | WH-4-023            | 0.107834 | 0.131559 | 56992 |
| KIF15 | WZ-1-84             | 0.075215 | 0.329994 | 56992 |
| KIF15 | WZ3105              | -0.27054 | 1.02E-15 | 56992 |

|        |                    |          |          |       |
|--------|--------------------|----------|----------|-------|
| KIF15  | XAV939             | 0.166529 | 5.63E-06 | 56992 |
| KIF15  | XL-184             | -0.09605 | 0.021369 | 56992 |
| KIF15  | XMD11-85h          | 0.023663 | 0.908066 | 56992 |
| KIF15  | XMD13-2            | -0.23287 | 8.5E-12  | 56992 |
| KIF15  | XMD14-99           | -0.12215 | 0.000814 | 56992 |
| KIF15  | XMD15-27           | -0.11386 | 0.005666 | 56992 |
| KIF15  | XMD8-85            | -0.01776 | 0.864214 | 56992 |
| KIF15  | XMD8-92            | -0.03373 | 0.77869  | 56992 |
| KIF15  | Y-39983            | -0.23712 | 8.04E-12 | 56992 |
| KIF15  | YK 4-279           | -0.02098 | 0.739955 | 56992 |
| KIF15  | YM155              | -0.08694 | 0.055339 | 56992 |
| KIF15  | YM201636           | -0.21051 | 1.28E-09 | 56992 |
| KIF15  | Z-LLN1e-CHO        | -0.00614 | 0.949708 | 56992 |
| KIF15  | ZG-10              | -0.16406 | 0.003872 | 56992 |
| KIF15  | ZM-447439          | -0.20016 | 4.74E-07 | 56992 |
| KIF15  | ZSTK474            | -0.20267 | 4.93E-09 | 56992 |
| KIF15  | Zibotentan         | 0.02259  | 0.947871 | 56992 |
| KIF15  | piperlongumine     | 0.028085 | 0.556871 | 56992 |
| KIF15  | rTRAIL             | 0.020122 | 0.817482 | 56992 |
| KIF15  | selumetinib        | 0.259802 | 1.99E-14 | 56992 |
| KIF18A | (5Z)-7-Oxozeaenol  | 0.073832 | 0.063704 | 81930 |
| KIF18A | 17-AAG             | 0.059647 | 0.116943 | 81930 |
| KIF18A | 5-Fluorouracil     | 0.04022  | 0.292975 | 81930 |
| KIF18A | 681640             | 0.001771 | 0.982713 | 81930 |
| KIF18A | A-443654           | -0.07336 | 0.64137  | 81930 |
| KIF18A | A-770041           | -0.11984 | 0.091647 | 81930 |
| KIF18A | AC220              | 0.035091 | 0.488653 | 81930 |
| KIF18A | AG-014699          | -0.01354 | 0.784945 | 81930 |
| KIF18A | AICAR              | -0.03164 | 0.458508 | 81930 |
| KIF18A | AKT inhibitor VIII | 0.049625 | 0.275976 | 81930 |
| KIF18A | AMG-706            | 0.014118 | 0.85176  | 81930 |
| KIF18A | AP-24534           | -0.04205 | 0.32803  | 81930 |
| KIF18A | AR-42              | -0.03755 | 0.318018 | 81930 |
| KIF18A | AS601245           | 0.018025 | 0.781879 | 81930 |
| KIF18A | AS605240           | 0.054813 | 0.199008 | 81930 |
| KIF18A | AT-7519            | -0.08499 | 0.01759  | 81930 |
| KIF18A | ATRA               | 0.087392 | 0.048429 | 81930 |
| KIF18A | AUY922             | -0.01045 | 0.879818 | 81930 |
| KIF18A | AZ628              | 0.135048 | 0.042394 | 81930 |
| KIF18A | AZD6482            | -0.02216 | 0.686339 | 81930 |
| KIF18A | AZD7762            | -0.10287 | 0.008164 | 81930 |
| KIF18A | AZD8055            | -0.06447 | 0.105912 | 81930 |
| KIF18A | Afatinib           | 0.070764 | 0.056099 | 81930 |
| KIF18A | Axitinib           | -0.01116 | 0.871877 | 81930 |
| KIF18A | BAY 61-3606        | -0.01938 | 0.672244 | 81930 |
| KIF18A | BEZ235             | -0.07552 | 0.095947 | 81930 |
| KIF18A | BHG712             | 0.018173 | 0.64752  | 81930 |
| KIF18A | BI-2536            | -0.14088 | 0.106523 | 81930 |
| KIF18A | BIRB 0796          | -0.01994 | 0.733174 | 81930 |
| KIF18A | BIX02189           | -0.02455 | 0.534181 | 81930 |

|        |                   |          |          |       |
|--------|-------------------|----------|----------|-------|
| KIF18A | BMS-509744        | -0.00934 | 0.936325 | 81930 |
| KIF18A | BMS-536924        | 0.056157 | 0.360512 | 81930 |
| KIF18A | BMS-708163        | 0.03816  | 0.36202  | 81930 |
| KIF18A | BMS-754807        | 0.073474 | 0.145277 | 81930 |
| KIF18A | BMS345541         | -0.04716 | 0.205969 | 81930 |
| KIF18A | BX-795            | -0.08427 | 0.048395 | 81930 |
| KIF18A | BX-912            | -0.06809 | 0.059142 | 81930 |
| KIF18A | Belinostat        | -0.03339 | 0.396752 | 81930 |
| KIF18A | Bexarotene        | 0.006796 | 0.95523  | 81930 |
| KIF18A | Bicalutamide      | -0.08089 | 0.055257 | 81930 |
| KIF18A | Bleomycin         | 0.002322 | 0.977203 | 81930 |
| KIF18A | Bleomycin (50 uM) | -0.04638 | 0.216112 | 81930 |
| KIF18A | Bortezomib        | -0.0377  | 0.676076 | 81930 |
| KIF18A | Bosutinib         | -0.05312 | 0.302945 | 81930 |
| KIF18A | Bryostatins 1     | 0.041364 | 0.437918 | 81930 |
| KIF18A | CAL-101           | -0.05175 | 0.181175 | 81930 |
| KIF18A | CAY10603          | -0.05308 | 0.149584 | 81930 |
| KIF18A | CCT007093         | 0.075364 | 0.071188 | 81930 |
| KIF18A | CCT018159         | -0.04244 | 0.416003 | 81930 |
| KIF18A | CEP-701           | -0.05026 | 0.227842 | 81930 |
| KIF18A | CGP-082996        | -0.0623  | 0.515029 | 81930 |
| KIF18A | CGP-60474         | -0.10053 | 0.189151 | 81930 |
| KIF18A | CH5424802         | -0.03241 | 0.610861 | 81930 |
| KIF18A | CHIR-99021        | -0.06509 | 0.088641 | 81930 |
| KIF18A | CI-1040           | 0.109956 | 0.006251 | 81930 |
| KIF18A | CMK               | -0.09617 | 0.344038 | 81930 |
| KIF18A | CP466722          | -0.06616 | 0.069152 | 81930 |
| KIF18A | CP724714          | 0.04495  | 0.404855 | 81930 |
| KIF18A | CUDC-101          | -0.03026 | 0.442038 | 81930 |
| KIF18A | CX-5461           | -0.00317 | 0.941581 | 81930 |
| KIF18A | Camptothecin      | -0.07419 | 0.079479 | 81930 |
| KIF18A | Cetuximab         | 0.035306 | 0.410981 | 81930 |
| KIF18A | Cisplatin         | -0.04838 | 0.329784 | 81930 |
| KIF18A | Crizotinib        | -0.09444 | 0.402242 | 81930 |
| KIF18A | Cyclopamine       | -0.05763 | 0.59799  | 81930 |
| KIF18A | Cytarabine        | -0.05786 | 0.236937 | 81930 |
| KIF18A | DMOG              | -0.08    | 0.059293 | 81930 |
| KIF18A | Dabrafenib        | 0.080308 | 0.050479 | 81930 |
| KIF18A | Dasatinib         | -0.06992 | 0.304689 | 81930 |
| KIF18A | Docetaxel         | -0.05674 | 0.138277 | 81930 |
| KIF18A | Doxorubicin       | -0.00844 | 0.920411 | 81930 |
| KIF18A | EHT 1864          | 0.097211 | 0.068459 | 81930 |
| KIF18A | EKB-569           | 0.006063 | 0.900804 | 81930 |
| KIF18A | EX-527            | 0.014274 | 0.914823 | 81930 |
| KIF18A | Elesclomol        | -0.10721 | 0.009294 | 81930 |
| KIF18A | Embelin           | -0.01821 | 0.802521 | 81930 |
| KIF18A | Epothilone B      | -0.03902 | 0.460116 | 81930 |
| KIF18A | Erlotinib         | 0.156545 | 0.018637 | 81930 |
| KIF18A | Etoposide         | -0.06626 | 0.140831 | 81930 |
| KIF18A | FH535             | 0.042686 | 0.387568 | 81930 |

|        |                    |          |          |       |
|--------|--------------------|----------|----------|-------|
| KIF18A | FK866              | -0.09966 | 0.00562  | 81930 |
| KIF18A | FMK                | 0.017084 | 0.834787 | 81930 |
| KIF18A | FR-180204          | 0.069415 | 0.145195 | 81930 |
| KIF18A | FTI-277            | 0.022924 | 0.612729 | 81930 |
| KIF18A | Foretinib          | -0.07328 | 0.066263 | 81930 |
| KIF18A | GDC0449            | 0.023607 | 0.840817 | 81930 |
| KIF18A | GDC0941            | -0.06412 | 0.208264 | 81930 |
| KIF18A | GNF-2              | -0.05826 | 0.80029  | 81930 |
| KIF18A | GSK-650394         | -0.01922 | 0.831893 | 81930 |
| KIF18A | GSK1070916         | -0.0548  | 0.147909 | 81930 |
| KIF18A | GSK1904529A        | 0.000405 | 0.994507 | 81930 |
| KIF18A | GSK2126458         | -0.01456 | 0.732151 | 81930 |
| KIF18A | GSK269962A         | -0.0498  | 0.324866 | 81930 |
| KIF18A | GSK429286A         | -0.08135 | 0.039825 | 81930 |
| KIF18A | GSK690693          | -0.06354 | 0.089865 | 81930 |
| KIF18A | GW 441756          | 0.000505 | 0.997922 | 81930 |
| KIF18A | GW-2580            | 0.012141 | 0.989269 | 81930 |
| KIF18A | GW843682X          | -0.14173 | 0.057064 | 81930 |
| KIF18A | Gefitinib          | 0.086129 | 0.032858 | 81930 |
| KIF18A | Gemcitabine        | -0.07022 | 0.130625 | 81930 |
| KIF18A | Genentech Cpd 10   | -0.05926 | 0.115057 | 81930 |
| KIF18A | HG-5-113-01        | -0.06208 | 0.380899 | 81930 |
| KIF18A | HG-5-88-01         | 0.037546 | 0.82236  | 81930 |
| KIF18A | HG-6-64-1          | -0.03751 | 0.45777  | 81930 |
| KIF18A | I-BET-762          | -0.00579 | 0.885508 | 81930 |
| KIF18A | IOX2               | -0.044   | 0.448405 | 81930 |
| KIF18A | IPA-3              | -0.04142 | 0.314791 | 81930 |
| KIF18A | Imatinib           | -0.0445  | 0.793507 | 81930 |
| KIF18A | Ispinesib Mesylate | -0.02833 | 0.472255 | 81930 |
| KIF18A | JNJ-26854165       | -0.0011  | 0.989463 | 81930 |
| KIF18A | JNK Inhibitor VIII | -0.0062  | 0.904689 | 81930 |
| KIF18A | JNK-9L             | 0.009957 | 0.89418  | 81930 |
| KIF18A | JQ1                | 0.064772 | 0.120027 | 81930 |
| KIF18A | JQ12               | -0.00093 | 0.991265 | 81930 |
| KIF18A | JW-7-24-1          | -0.05572 | 0.129496 | 81930 |
| KIF18A | JW-7-52-1          | -0.10062 | 0.243315 | 81930 |
| KIF18A | KIN001-055         | 0.016479 | 0.843161 | 81930 |
| KIF18A | KIN001-102         | -0.03412 | 0.366516 | 81930 |
| KIF18A | KIN001-135         | 0.099416 | 0.277849 | 81930 |
| KIF18A | KIN001-236         | 0.02376  | 0.556174 | 81930 |
| KIF18A | KIN001-244         | -0.0266  | 0.504517 | 81930 |
| KIF18A | KIN001-260         | 0.00057  | 0.988856 | 81930 |
| KIF18A | KIN001-266         | 0.014496 | 0.795933 | 81930 |
| KIF18A | KIN001-270         | -0.08676 | 0.023428 | 81930 |
| KIF18A | KU-55933           | -0.04747 | 0.427291 | 81930 |
| KIF18A | LAQ824             | -0.04112 | 0.320236 | 81930 |
| KIF18A | LFM-A13            | 0.025969 | 0.649117 | 81930 |
| KIF18A | LY317615           | -0.02265 | 0.643099 | 81930 |
| KIF18A | Lapatinib          | 0.176911 | 0.002763 | 81930 |
| KIF18A | Lenalidomide       | -0.02195 | 0.812389 | 81930 |

|        |                    |          |          |       |
|--------|--------------------|----------|----------|-------|
| KIF18A | Linifanib          | 0.04306  | 0.410767 | 81930 |
| KIF18A | Lisitinib          | 0.080216 | 0.135923 | 81930 |
| KIF18A | MG-132             | -0.00236 | 0.986174 | 81930 |
| KIF18A | MK-2206            | -0.0754  | 0.118716 | 81930 |
| KIF18A | MLN4924            | 0.010195 | 0.886553 | 81930 |
| KIF18A | MP470              | -0.00947 | 0.854717 | 81930 |
| KIF18A | MPS-1-IN-1         | 0.009229 | 0.835286 | 81930 |
| KIF18A | MS-275             | -0.12823 | 0.075277 | 81930 |
| KIF18A | Masitinib          | 0.000131 | 0.998079 | 81930 |
| KIF18A | Methotrexate       | -0.04798 | 0.212571 | 81930 |
| KIF18A | Midostaurin        | -0.03304 | 0.487509 | 81930 |
| KIF18A | Mitomycin C        | 0.006968 | 0.91802  | 81930 |
| KIF18A | NG-25              | -0.02968 | 0.441834 | 81930 |
| KIF18A | NPK76-II-72-1      | -0.09517 | 0.00685  | 81930 |
| KIF18A | NSC-207895         | -0.10466 | 0.009639 | 81930 |
| KIF18A | NSC-87877          | 0.063626 | 0.231667 | 81930 |
| KIF18A | NU-7441            | -0.03746 | 0.620531 | 81930 |
| KIF18A | Navitoclax         | -0.04952 | 0.200097 | 81930 |
| KIF18A | Nilotinib          | -0.02282 | 0.699255 | 81930 |
| KIF18A | Nutlin-3a (-)      | 0.126361 | 0.002365 | 81930 |
| KIF18A | OSI-027            | -0.05234 | 0.15961  | 81930 |
| KIF18A | OSI-930            | 0.007712 | 0.866446 | 81930 |
| KIF18A | OSU-03012          | -0.04823 | 0.330261 | 81930 |
| KIF18A | Obatoclax Mesylate | -0.01027 | 0.862607 | 81930 |
| KIF18A | Olaparib           | -0.03973 | 0.378132 | 81930 |
| KIF18A | PAC-1              | -0.04661 | 0.281977 | 81930 |
| KIF18A | PD-0325901         | 0.120593 | 0.001627 | 81930 |
| KIF18A | PD-0332991         | 0.012074 | 0.866868 | 81930 |
| KIF18A | PD-173074          | -0.00758 | 0.978834 | 81930 |
| KIF18A | PF-4708671         | 0.059799 | 0.50427  | 81930 |
| KIF18A | PF-562271          | -0.00604 | 0.935997 | 81930 |
| KIF18A | PFI-1              | 0.05168  | 0.276958 | 81930 |
| KIF18A | PHA-665752         | 0.015839 | 0.931022 | 81930 |
| KIF18A | PHA-793887         | -0.05447 | 0.1324   | 81930 |
| KIF18A | PI-103             | -0.05404 | 0.145462 | 81930 |
| KIF18A | PIK-93             | -0.06299 | 0.081455 | 81930 |
| KIF18A | PLX4720            | 0.118013 | 0.001764 | 81930 |
| KIF18A | Paclitaxel         | -0.09313 | 0.325148 | 81930 |
| KIF18A | Parthenolide       | -0.05718 | 0.585982 | 81930 |
| KIF18A | Pazopanib          | -0.01555 | 0.813391 | 81930 |
| KIF18A | Phenformin         | 0.018306 | 0.65747  | 81930 |
| KIF18A | Pyrimethamine      | -0.05185 | 0.661677 | 81930 |
| KIF18A | QL-VIII-58         | -0.12675 | 0.045322 | 81930 |
| KIF18A | QL-X-138           | -0.06572 | 0.076721 | 81930 |
| KIF18A | QL-XI-92           | -0.06851 | 0.061398 | 81930 |
| KIF18A | QL-XII-47          | -0.03946 | 0.344718 | 81930 |
| KIF18A | QL-XII-61          | -0.05523 | 0.421284 | 81930 |
| KIF18A | QS11               | -0.02371 | 0.741112 | 81930 |
| KIF18A | RDEA119            | 0.150762 | 1.53E-05 | 81930 |
| KIF18A | RO-3306            | -0.03617 | 0.408545 | 81930 |

|        |                     |          |          |       |
|--------|---------------------|----------|----------|-------|
| KIF18A | Rapamycin           | -0.06777 | 0.555203 | 81930 |
| KIF18A | Roscovitine         | -0.00696 | 0.979146 | 81930 |
| KIF18A | Ruxolitinib         | -0.01543 | 0.809016 | 81930 |
| KIF18A | S-Trityl-L-cysteine | -0.07268 | 0.364947 | 81930 |
| KIF18A | SB 216763           | 0.018266 | 0.743023 | 81930 |
| KIF18A | SB 505124           | 0.014404 | 0.885301 | 81930 |
| KIF18A | SB52334             | 0.084091 | 0.046415 | 81930 |
| KIF18A | SB590885            | 0.152314 | 0.000193 | 81930 |
| KIF18A | SGC0946             | 0.032328 | 0.571769 | 81930 |
| KIF18A | SL 0101-1           | 0.077101 | 0.29271  | 81930 |
| KIF18A | SN-38               | -0.06281 | 0.140607 | 81930 |
| KIF18A | SNX-2112            | -0.04338 | 0.25512  | 81930 |
| KIF18A | STF-62247           | -0.05472 | 0.177651 | 81930 |
| KIF18A | Salubrinal          | -0.0224  | 0.826632 | 81930 |
| KIF18A | Saracatinib         | -0.03436 | 0.708616 | 81930 |
| KIF18A | Shikonin            | -0.03814 | 0.490484 | 81930 |
| KIF18A | Sorafenib           | 0.042212 | 0.728621 | 81930 |
| KIF18A | Sunitinib           | -0.04392 | 0.591305 | 81930 |
| KIF18A | T0901317            | -0.05878 | 0.150332 | 81930 |
| KIF18A | TAE684              | -0.03476 | 0.794683 | 81930 |
| KIF18A | TAK-715             | -0.01577 | 0.696032 | 81930 |
| KIF18A | TG101348            | -0.04612 | 0.216528 | 81930 |
| KIF18A | TGX221              | 0.008108 | 0.91855  | 81930 |
| KIF18A | THZ-2-102-1         | -0.03134 | 0.416756 | 81930 |
| KIF18A | THZ-2-49            | -0.02868 | 0.467265 | 81930 |
| KIF18A | TL-1-85             | -0.03061 | 0.430828 | 81930 |
| KIF18A | TL-2-105            | -0.01909 | 0.643301 | 81930 |
| KIF18A | TPCA-1              | -0.04501 | 0.222844 | 81930 |
| KIF18A | TW 37               | -0.10463 | 0.00935  | 81930 |
| KIF18A | Talazoparib         | -0.02752 | 0.576369 | 81930 |
| KIF18A | Tamoxifen           | -0.00206 | 0.991495 | 81930 |
| KIF18A | Temozolomide        | -0.01612 | 0.857712 | 81930 |
| KIF18A | Temsirolimus        | -0.12185 | 0.003453 | 81930 |
| KIF18A | Thapsigargin        | -0.03375 | 0.625414 | 81930 |
| KIF18A | Tipifarnib          | 0.009808 | 0.912783 | 81930 |
| KIF18A | Tivozanib           | -0.01901 | 0.783603 | 81930 |
| KIF18A | Trametinib          | 0.128196 | 0.000368 | 81930 |
| KIF18A | Tubastatin A        | 0.0104   | 0.79709  | 81930 |
| KIF18A | UNC0638             | -0.01231 | 0.757152 | 81930 |
| KIF18A | UNC1215             | 0.02881  | 0.605304 | 81930 |
| KIF18A | VNLG/124            | 0.041709 | 0.331114 | 81930 |
| KIF18A | VX-11e              | 0.111714 | 0.007051 | 81930 |
| KIF18A | VX-680              | -0.10116 | 0.233072 | 81930 |
| KIF18A | VX-702              | 0.035124 | 0.883998 | 81930 |
| KIF18A | Veliparib           | 0.002477 | 0.978938 | 81930 |
| KIF18A | Vinblastine         | -0.08624 | 0.038933 | 81930 |
| KIF18A | Vinorelbine         | -0.05143 | 0.337539 | 81930 |
| KIF18A | Vorinostat          | -0.07605 | 0.040007 | 81930 |
| KIF18A | WH-4-023            | -0.03117 | 0.726252 | 81930 |
| KIF18A | WZ-1-84             | 0.014435 | 0.878961 | 81930 |

|        |                    |          |          |       |
|--------|--------------------|----------|----------|-------|
| KIF18A | WZ3105             | -0.02497 | 0.516303 | 81930 |
| KIF18A | XAV939             | -0.05212 | 0.188897 | 81930 |
| KIF18A | XL-184             | -0.00523 | 0.93146  | 81930 |
| KIF18A | XMD11-85h          | 0.025684 | 0.897816 | 81930 |
| KIF18A | XMD13-2            | -0.01716 | 0.669372 | 81930 |
| KIF18A | XMD14-99           | 0.012765 | 0.772638 | 81930 |
| KIF18A | XMD15-27           | -0.03876 | 0.429112 | 81930 |
| KIF18A | XMD8-85            | 0.012024 | 0.9114   | 81930 |
| KIF18A | XMD8-92            | -0.01936 | 0.890659 | 81930 |
| KIF18A | Y-39983            | -0.10055 | 0.005992 | 81930 |
| KIF18A | YK 4-279           | -0.02919 | 0.623758 | 81930 |
| KIF18A | YM155              | -0.09668 | 0.030497 | 81930 |
| KIF18A | YM201636           | -0.02072 | 0.610764 | 81930 |
| KIF18A | Z-LLN1e-CHO        | -0.03465 | 0.679753 | 81930 |
| KIF18A | ZG-10              | -0.0802  | 0.208204 | 81930 |
| KIF18A | ZM-447439          | -0.02535 | 0.626671 | 81930 |
| KIF18A | ZSTK474            | -0.05158 | 0.1678   | 81930 |
| KIF18A | Zibotentan         | 0.006155 | 0.990687 | 81930 |
| KIF18A | piperlongumine     | -0.08306 | 0.042242 | 81930 |
| KIF18A | rTRAIL             | 0.049907 | 0.484303 | 81930 |
| KIF18A | selumetinib        | 0.170039 | 9.68E-07 | 81930 |
| KIF4A  | (5Z)-7-Oxozeaenol  | 0.172217 | 2.2E-06  | 24137 |
| KIF4A  | 17-AAG             | 0.092665 | 0.012627 | 24137 |
| KIF4A  | 5-Fluorouracil     | 0.084066 | 0.021072 | 24137 |
| KIF4A  | 681640             | 0.025319 | 0.699982 | 24137 |
| KIF4A  | A-443654           | -0.00444 | 0.987966 | 24137 |
| KIF4A  | A-770041           | -0.0115  | 0.915075 | 24137 |
| KIF4A  | AC220              | 0.026939 | 0.611912 | 24137 |
| KIF4A  | AG-014699          | 0.038909 | 0.38013  | 24137 |
| KIF4A  | AICAR              | -0.00255 | 0.956318 | 24137 |
| KIF4A  | AKT inhibitor VIII | 0.071652 | 0.100306 | 24137 |
| KIF4A  | AMG-706            | 0.011909 | 0.878796 | 24137 |
| KIF4A  | AP-24534           | 0.034064 | 0.439838 | 24137 |
| KIF4A  | AR-42              | -0.03542 | 0.348152 | 24137 |
| KIF4A  | AS601245           | 0.062807 | 0.218897 | 24137 |
| KIF4A  | AS605240           | 0.075004 | 0.067449 | 24137 |
| KIF4A  | AT-7519            | -0.02978 | 0.434891 | 24137 |
| KIF4A  | ATRA               | 0.01958  | 0.731305 | 24137 |
| KIF4A  | AUY922             | 0.079276 | 0.091492 | 24137 |
| KIF4A  | AZ628              | 0.207978 | 0.000763 | 24137 |
| KIF4A  | AZD6482            | 0.029529 | 0.568037 | 24137 |
| KIF4A  | AZD7762            | -0.05244 | 0.204439 | 24137 |
| KIF4A  | AZD8055            | 0.028256 | 0.50775  | 24137 |
| KIF4A  | Afatinib           | 0.092658 | 0.010857 | 24137 |
| KIF4A  | Axitinib           | -0.01932 | 0.764047 | 24137 |
| KIF4A  | BAY 61-3606        | 0.084687 | 0.033514 | 24137 |
| KIF4A  | BEZ235             | 0.02995  | 0.573383 | 24137 |
| KIF4A  | BHG712             | 0.056734 | 0.125988 | 24137 |
| KIF4A  | BI-2536            | -0.09219 | 0.326957 | 24137 |
| KIF4A  | BIRB 0796          | 0.039463 | 0.45821  | 24137 |



|       |                   |          |          |       |
|-------|-------------------|----------|----------|-------|
| KIF4A | BIX02189          | 0.00488  | 0.910306 | 24137 |
| KIF4A | BMS-509744        | 0.01358  | 0.905335 | 24137 |
| KIF4A | BMS-536924        | 0.06953  | 0.221145 | 24137 |
| KIF4A | BMS-708163        | 0.053945 | 0.183512 | 24137 |
| KIF4A | BMS-754807        | 0.090304 | 0.060914 | 24137 |
| KIF4A | BMS345541         | -0.04529 | 0.225858 | 24137 |
| KIF4A | BX-795            | -0.04039 | 0.396548 | 24137 |
| KIF4A | BX-912            | -0.05439 | 0.1364   | 24137 |
| KIF4A | Belinostat        | -0.02946 | 0.459195 | 24137 |
| KIF4A | Bexarotene        | 0.011608 | 0.913082 | 24137 |
| KIF4A | Bicalutamide      | 0.01334  | 0.802898 | 24137 |
| KIF4A | Bleomycin         | 0.108101 | 0.019683 | 24137 |
| KIF4A | Bleomycin (50 uM) | 0.094971 | 0.008246 | 24137 |
| KIF4A | Bortezomib        | 0.038415 | 0.669325 | 24137 |
| KIF4A | Bosutinib         | 0.027118 | 0.652343 | 24137 |
| KIF4A | Bryostatins 1     | 0.040477 | 0.448786 | 24137 |
| KIF4A | CAL-101           | 0.015911 | 0.709107 | 24137 |
| KIF4A | CAY10603          | -0.04284 | 0.251553 | 24137 |
| KIF4A | CCT007093         | 0.08273  | 0.045036 | 24137 |
| KIF4A | CCT018159         | 0.040824 | 0.436191 | 24137 |
| KIF4A | CEP-701           | 0.011823 | 0.80537  | 24137 |
| KIF4A | CGP-082996        | -0.03928 | 0.71366  | 24137 |
| KIF4A | CGP-60474         | 0.033744 | 0.729542 | 24137 |
| KIF4A | CH5424802         | -0.02917 | 0.657637 | 24137 |
| KIF4A | CHIR-99021        | 0.01291  | 0.76967  | 24137 |
| KIF4A | CI-1040           | 0.181268 | 2.44E-06 | 24137 |
| KIF4A | CMK               | 0.03637  | 0.784522 | 24137 |
| KIF4A | CP466722          | -0.02647 | 0.494546 | 24137 |
| KIF4A | CP724714          | 0.057403 | 0.261286 | 24137 |
| KIF4A | CUDC-101          | -0.03294 | 0.399717 | 24137 |
| KIF4A | CX-5461           | -0.00965 | 0.819897 | 24137 |
| KIF4A | Camptothecin      | -0.01722 | 0.740662 | 24137 |
| KIF4A | Cetuximab         | 0.075288 | 0.060266 | 24137 |
| KIF4A | Cisplatin         | -0.0177  | 0.762943 | 24137 |
| KIF4A | Crizotinib        | -0.02913 | 0.868158 | 24137 |
| KIF4A | Cyclophosphamide  | -0.01375 | 0.924033 | 24137 |
| KIF4A | Cytarabine        | 0.024564 | 0.667746 | 24137 |
| KIF4A | DMOG              | -0.01285 | 0.816346 | 24137 |
| KIF4A | Dabrafenib        | 0.13762  | 0.000348 | 24137 |
| KIF4A | Dasatinib         | 0.034418 | 0.640957 | 24137 |
| KIF4A | Docetaxel         | 0.027589 | 0.489422 | 24137 |
| KIF4A | Doxorubicin       | 0.055609 | 0.353671 | 24137 |
| KIF4A | EHT 1864          | 0.026187 | 0.730656 | 24137 |
| KIF4A | EKB-569           | 0.010842 | 0.821416 | 24137 |
| KIF4A | EX-527            | -0.0239  | 0.84773  | 24137 |
| KIF4A | Elesclomol        | -0.0403  | 0.383919 | 24137 |
| KIF4A | Embelin           | 0.051883 | 0.359956 | 24137 |
| KIF4A | Epothilone B      | 0.03497  | 0.516842 | 24137 |
| KIF4A | Erlotinib         | 0.095617 | 0.183014 | 24137 |
| KIF4A | Etoposide         | -0.02501 | 0.644663 | 24137 |

|       |                    |          |          |       |
|-------|--------------------|----------|----------|-------|
| KIF4A | FH535              | 0.048576 | 0.314891 | 24137 |
| KIF4A | FK866              | -0.0483  | 0.199486 | 24137 |
| KIF4A | FMK                | 0.064424 | 0.297962 | 24137 |
| KIF4A | FR-180204          | 0.056802 | 0.252064 | 24137 |
| KIF4A | FTI-277            | 0.100013 | 0.012052 | 24137 |
| KIF4A | Foretinib          | -0.00771 | 0.878123 | 24137 |
| KIF4A | GDC0449            | 0.050941 | 0.577763 | 24137 |
| KIF4A | GDC0941            | 0.003842 | 0.960277 | 24137 |
| KIF4A | GNF-2              | -0.00811 | 0.983292 | 24137 |
| KIF4A | GSK-650394         | 0.02178  | 0.805286 | 24137 |
| KIF4A | GSK1070916         | -0.07347 | 0.047585 | 24137 |
| KIF4A | GSK1904529A        | -0.00634 | 0.911693 | 24137 |
| KIF4A | GSK2126458         | 0.006842 | 0.877414 | 24137 |
| KIF4A | GSK269962A         | 0.039292 | 0.462966 | 24137 |
| KIF4A | GSK429286A         | -0.05068 | 0.227782 | 24137 |
| KIF4A | GSK690693          | -0.0772  | 0.036575 | 24137 |
| KIF4A | GW 441756          | -0.02097 | 0.93525  | 24137 |
| KIF4A | GW-2580            | 0.012176 | 0.989269 | 24137 |
| KIF4A | GW843682X          | -0.08684 | 0.296181 | 24137 |
| KIF4A | Gefitinib          | 0.12347  | 0.001574 | 24137 |
| KIF4A | Gemcitabine        | -0.01201 | 0.841128 | 24137 |
| KIF4A | Genentech Cpd 10   | -0.07126 | 0.054697 | 24137 |
| KIF4A | HG-5-113-01        | -0.00764 | 0.935928 | 24137 |
| KIF4A | HG-5-88-01         | 0.062919 | 0.636507 | 24137 |
| KIF4A | HG-6-64-1          | 0.075713 | 0.087206 | 24137 |
| KIF4A | I-BET-762          | -0.00701 | 0.861251 | 24137 |
| KIF4A | IOX2               | -0.00425 | 0.958791 | 24137 |
| KIF4A | IPA-3              | 0.012565 | 0.783803 | 24137 |
| KIF4A | Imatinib           | -0.00531 | 0.983232 | 24137 |
| KIF4A | Ispinesib Mesylate | 0.003172 | 0.9403   | 24137 |
| KIF4A | JNJ-26854165       | 0.034497 | 0.523353 | 24137 |
| KIF4A | JNK Inhibitor VIII | -0.00174 | 0.973883 | 24137 |
| KIF4A | JNK-9L             | 0.0994   | 0.035339 | 24137 |
| KIF4A | JQ1                | 0.074588 | 0.069907 | 24137 |
| KIF4A | JQ12               | 0.071621 | 0.154729 | 24137 |
| KIF4A | JW-7-24-1          | -0.03727 | 0.323621 | 24137 |
| KIF4A | JW-7-52-1          | 0.032577 | 0.781359 | 24137 |
| KIF4A | KIN001-055         | 0.062871 | 0.259947 | 24137 |
| KIF4A | KIN001-102         | -0.01665 | 0.674962 | 24137 |
| KIF4A | KIN001-135         | 0.041242 | 0.718349 | 24137 |
| KIF4A | KIN001-236         | 0.011098 | 0.794708 | 24137 |
| KIF4A | KIN001-244         | -0.00695 | 0.87168  | 24137 |
| KIF4A | KIN001-260         | 0.012662 | 0.759403 | 24137 |
| KIF4A | KIN001-266         | 0.007563 | 0.89728  | 24137 |
| KIF4A | KIN001-270         | -0.07231 | 0.062727 | 24137 |
| KIF4A | KU-55933           | -0.01361 | 0.864523 | 24137 |
| KIF4A | LAQ824             | 0.012072 | 0.791258 | 24137 |
| KIF4A | LFM-A13            | 0.000201 | 0.997693 | 24137 |
| KIF4A | LY317615           | -0.00708 | 0.89669  | 24137 |
| KIF4A | Lapatinib          | 0.099744 | 0.11121  | 24137 |

|       |                    |          |          |       |
|-------|--------------------|----------|----------|-------|
| KIF4A | Lenalidomide       | 0.001571 | 0.988744 | 24137 |
| KIF4A | Linifanib          | 0.058596 | 0.227035 | 24137 |
| KIF4A | Lisitinib          | 0.074633 | 0.17486  | 24137 |
| KIF4A | MG-132             | 0.003027 | 0.982185 | 24137 |
| KIF4A | MK-2206            | -0.04789 | 0.35362  | 24137 |
| KIF4A | MLN4924            | 0.078571 | 0.13624  | 24137 |
| KIF4A | MP470              | -0.01934 | 0.686382 | 24137 |
| KIF4A | MPS-1-IN-1         | 0.033997 | 0.396065 | 24137 |
| KIF4A | MS-275             | -0.06851 | 0.403868 | 24137 |
| KIF4A | Masitinib          | 0.024966 | 0.544512 | 24137 |
| KIF4A | Methotrexate       | -0.00149 | 0.972277 | 24137 |
| KIF4A | Midostaurin        | 0.059065 | 0.17863  | 24137 |
| KIF4A | Mitomycin C        | 0.028354 | 0.618096 | 24137 |
| KIF4A | NG-25              | 0.006228 | 0.880062 | 24137 |
| KIF4A | NPK76-II-72-1      | -0.0934  | 0.008021 | 24137 |
| KIF4A | NSC-207895         | -0.13375 | 0.00072  | 24137 |
| KIF4A | NSC-87877          | 0.071649 | 0.171146 | 24137 |
| KIF4A | NU-7441            | 0.008066 | 0.942656 | 24137 |
| KIF4A | Navitoclax         | -0.11347 | 0.002034 | 24137 |
| KIF4A | Nilotinib          | 0.001152 | 0.985698 | 24137 |
| KIF4A | Nutlin-3a (-)      | 0.19428  | 9.95E-07 | 24137 |
| KIF4A | OSI-027            | -0.0329  | 0.39158  | 24137 |
| KIF4A | OSI-930            | 0.026593 | 0.52844  | 24137 |
| KIF4A | OSU-03012          | 0.061439 | 0.195009 | 24137 |
| KIF4A | Obatoclax Mesylate | 0.073513 | 0.099368 | 24137 |
| KIF4A | Olaparib           | 0.033599 | 0.465722 | 24137 |
| KIF4A | PAC-1              | 0.024644 | 0.600353 | 24137 |
| KIF4A | PD-0325901         | 0.181078 | 1.14E-06 | 24137 |
| KIF4A | PD-0332991         | 0.098927 | 0.034858 | 24137 |
| KIF4A | PD-173074          | -0.00583 | 0.984441 | 24137 |
| KIF4A | PF-4708671         | 0.045105 | 0.636298 | 24137 |
| KIF4A | PF-562271          | 0.050673 | 0.356541 | 24137 |
| KIF4A | PFI-1              | 0.103569 | 0.014992 | 24137 |
| KIF4A | PHA-665752         | -0.00178 | 0.991921 | 24137 |
| KIF4A | PHA-793887         | -0.01681 | 0.664073 | 24137 |
| KIF4A | PI-103             | -0.01967 | 0.621613 | 24137 |
| KIF4A | PIK-93             | -0.03441 | 0.357729 | 24137 |
| KIF4A | PLX4720            | 0.118167 | 0.001732 | 24137 |
| KIF4A | Paclitaxel         | 0.002194 | 0.991781 | 24137 |
| KIF4A | Parthenolide       | 0.001141 | 0.994346 | 24137 |
| KIF4A | Pazopanib          | 0.03263  | 0.581838 | 24137 |
| KIF4A | Phenformin         | -0.00588 | 0.892281 | 24137 |
| KIF4A | Pyrimethamine      | 0.012432 | 0.934467 | 24137 |
| KIF4A | QL-VIII-58         | -0.00712 | 0.9471   | 24137 |
| KIF4A | QL-X-138           | -0.06695 | 0.071127 | 24137 |
| KIF4A | QL-XI-92           | -0.05189 | 0.16516  | 24137 |
| KIF4A | QL-XII-47          | -0.0175  | 0.699604 | 24137 |
| KIF4A | QL-XII-61          | -0.04543 | 0.524974 | 24137 |
| KIF4A | QS11               | -0.00518 | 0.953003 | 24137 |
| KIF4A | RDEA119            | 0.240572 | 1.32E-12 | 24137 |

|       |                     |          |          |       |
|-------|---------------------|----------|----------|-------|
| KIF4A | RO-3306             | 0.014968 | 0.750902 | 24137 |
| KIF4A | Rapamycin           | -0.02481 | 0.870904 | 24137 |
| KIF4A | Roscovitine         | 0.099108 | 0.489944 | 24137 |
| KIF4A | Ruxolitinib         | -0.01374 | 0.832226 | 24137 |
| KIF4A | S-Trityl-L-cysteine | 0.033401 | 0.723203 | 24137 |
| KIF4A | SB 216763           | 0.061789 | 0.206798 | 24137 |
| KIF4A | SB 505124           | 0.038516 | 0.614649 | 24137 |
| KIF4A | SB52334             | 0.029395 | 0.573834 | 24137 |
| KIF4A | SB590885            | 0.137429 | 0.000996 | 24137 |
| KIF4A | SGC0946             | 0.025695 | 0.670318 | 24137 |
| KIF4A | SL 0101-1           | 0.087449 | 0.232512 | 24137 |
| KIF4A | SN-38               | 0.038024 | 0.411576 | 24137 |
| KIF4A | SNX-2112            | 0.002883 | 0.946532 | 24137 |
| KIF4A | STF-62247           | -0.01468 | 0.756273 | 24137 |
| KIF4A | Salubrinal          | 0.019803 | 0.848386 | 24137 |
| KIF4A | Saracatinib         | 0.001052 | 0.993533 | 24137 |
| KIF4A | Shikonin            | 0.005871 | 0.931577 | 24137 |
| KIF4A | Sorafenib           | 0.082844 | 0.393392 | 24137 |
| KIF4A | Sunitinib           | 0.055689 | 0.480833 | 24137 |
| KIF4A | T0901317            | -0.02502 | 0.576504 | 24137 |
| KIF4A | TAE684              | 0.002381 | 0.98995  | 24137 |
| KIF4A | TAK-715             | 0.0025   | 0.953553 | 24137 |
| KIF4A | TG101348            | -0.01803 | 0.649804 | 24137 |
| KIF4A | TGX221              | 0.067678 | 0.304633 | 24137 |
| KIF4A | THZ-2-102-1         | -0.0375  | 0.325745 | 24137 |
| KIF4A | THZ-2-49            | -0.01358 | 0.744486 | 24137 |
| KIF4A | TL-1-85             | 0.000323 | 0.994217 | 24137 |
| KIF4A | TL-2-105            | -0.01561 | 0.708116 | 24137 |
| KIF4A | TPCA-1              | -0.01849 | 0.63512  | 24137 |
| KIF4A | TW 37               | -0.03187 | 0.522725 | 24137 |
| KIF4A | Talazoparib         | 0.037496 | 0.426005 | 24137 |
| KIF4A | Tamoxifen           | 0.049879 | 0.646381 | 24137 |
| KIF4A | Temozolomide        | 0.034231 | 0.64843  | 24137 |
| KIF4A | Temsirolimus        | -0.01118 | 0.853315 | 24137 |
| KIF4A | Thapsigargin        | 0.01442  | 0.867557 | 24137 |
| KIF4A | Tipifarnib          | 0.068867 | 0.230942 | 24137 |
| KIF4A | Tivozanib           | -0.01637 | 0.817651 | 24137 |
| KIF4A | Trametinib          | 0.267906 | 1.11E-14 | 24137 |
| KIF4A | Tubastatin A        | 0.010148 | 0.801721 | 24137 |
| KIF4A | UNC0638             | -0.00534 | 0.896102 | 24137 |
| KIF4A | UNC1215             | 0.063045 | 0.190087 | 24137 |
| KIF4A | VNLG/124            | 0.04101  | 0.340376 | 24137 |
| KIF4A | VX-11e              | 0.156946 | 8.24E-05 | 24137 |
| KIF4A | VX-680              | -0.03443 | 0.748686 | 24137 |
| KIF4A | VX-702              | 0.04356  | 0.830523 | 24137 |
| KIF4A | Veliparib           | 0.027598 | 0.707292 | 24137 |
| KIF4A | Vinblastine         | -0.00289 | 0.959782 | 24137 |
| KIF4A | Vinorelbine         | -0.00697 | 0.924351 | 24137 |
| KIF4A | Vorinostat          | -0.07393 | 0.046099 | 24137 |
| KIF4A | WH-4-023            | 0.022446 | 0.809085 | 24137 |

|        |                    |          |          |       |
|--------|--------------------|----------|----------|-------|
| KIF4A  | WZ-1-84            | 0.035169 | 0.685979 | 24137 |
| KIF4A  | WZ3105             | -0.03414 | 0.365042 | 24137 |
| KIF4A  | XAV939             | 0.052013 | 0.189742 | 24137 |
| KIF4A  | XL-184             | 0.040832 | 0.397403 | 24137 |
| KIF4A  | XMD11-85h          | 0.074698 | 0.623853 | 24137 |
| KIF4A  | XMD13-2            | -0.01443 | 0.721611 | 24137 |
| KIF4A  | XMD14-99           | 0.050694 | 0.193909 | 24137 |
| KIF4A  | XMD15-27           | -0.01854 | 0.734348 | 24137 |
| KIF4A  | XMD8-85            | 0.074556 | 0.354595 | 24137 |
| KIF4A  | XMD8-92            | 0.032822 | 0.787697 | 24137 |
| KIF4A  | Y-39983            | -0.02875 | 0.479051 | 24137 |
| KIF4A  | YK 4-279           | 0.05733  | 0.266674 | 24137 |
| KIF4A  | YM155              | -0.06609 | 0.168312 | 24137 |
| KIF4A  | YM201636           | -0.03123 | 0.426585 | 24137 |
| KIF4A  | Z-LLN1e-CHO        | 0.071759 | 0.331699 | 24137 |
| KIF4A  | ZG-10              | -0.09196 | 0.139661 | 24137 |
| KIF4A  | ZM-447439          | -0.0145  | 0.793748 | 24137 |
| KIF4A  | ZSTK474            | -0.01249 | 0.7626   | 24137 |
| KIF4A  | Zibotentan         | 0.000213 | 0.999995 | 24137 |
| KIF4A  | piperlongumine     | 0.023248 | 0.635777 | 24137 |
| KIF4A  | rTRAIL             | 0.046761 | 0.519427 | 24137 |
| KIF4A  | selumetinib        | 0.238959 | 2.11E-12 | 24137 |
| MAD2L1 | (5Z)-7-Oxozeaenol  | 0.142492 | 0.000119 | 4085  |
| MAD2L1 | 17-AAG             | 0.226595 | 1.94E-10 | 4085  |
| MAD2L1 | 5-Fluorouracil     | -0.09224 | 0.010956 | 4085  |
| MAD2L1 | 681640             | 0.040229 | 0.51364  | 4085  |
| MAD2L1 | A-443654           | 0.001408 | 0.996809 | 4085  |
| MAD2L1 | A-770041           | 0.043088 | 0.628405 | 4085  |
| MAD2L1 | AC220              | -0.03224 | 0.531357 | 4085  |
| MAD2L1 | AG-014699          | 0.079537 | 0.053623 | 4085  |
| MAD2L1 | AICAR              | -0.1161  | 0.002452 | 4085  |
| MAD2L1 | AKT inhibitor VIII | 0.116179 | 0.005074 | 4085  |
| MAD2L1 | AMG-706            | 0.075576 | 0.151897 | 4085  |
| MAD2L1 | AP-24534           | -0.07482 | 0.063638 | 4085  |
| MAD2L1 | AR-42              | -0.2014  | 5.4E-09  | 4085  |
| MAD2L1 | AS601245           | 0.100654 | 0.028418 | 4085  |
| MAD2L1 | AS605240           | -0.02442 | 0.611725 | 4085  |
| MAD2L1 | AT-7519            | -0.15412 | 9.52E-06 | 4085  |
| MAD2L1 | ATRA               | -0.06769 | 0.145031 | 4085  |
| MAD2L1 | AUY922             | 0.054727 | 0.277874 | 4085  |
| MAD2L1 | AZ628              | 0.106151 | 0.126962 | 4085  |
| MAD2L1 | AZD6482            | 0.081848 | 0.049965 | 4085  |
| MAD2L1 | AZD7762            | -0.18433 | 7.6E-07  | 4085  |
| MAD2L1 | AZD8055            | -0.09522 | 0.014057 | 4085  |
| MAD2L1 | Afatinib           | 0.166323 | 1.83E-06 | 4085  |
| MAD2L1 | Axitinib           | -0.07851 | 0.097132 | 4085  |
| MAD2L1 | BAY 61-3606        | -0.05103 | 0.220752 | 4085  |
| MAD2L1 | BEZ235             | 0.059924 | 0.202194 | 4085  |
| MAD2L1 | BHG712             | -0.12972 | 0.000239 | 4085  |
| MAD2L1 | BI-2536            | -0.08703 | 0.359983 | 4085  |

|        |                   |          |          |      |
|--------|-------------------|----------|----------|------|
| MAD2L1 | BIRB 0796         | 0.087488 | 0.064302 | 4085 |
| MAD2L1 | BIX02189          | -0.13535 | 0.000133 | 4085 |
| MAD2L1 | BMS-509744        | 0.068167 | 0.454684 | 4085 |
| MAD2L1 | BMS-536924        | 0.00648  | 0.946909 | 4085 |
| MAD2L1 | BMS-708163        | 0.115305 | 0.002723 | 4085 |
| MAD2L1 | BMS-754807        | 0.040609 | 0.468498 | 4085 |
| MAD2L1 | BMS345541         | -0.17497 | 4.49E-07 | 4085 |
| MAD2L1 | BX-795            | -0.06153 | 0.167671 | 4085 |
| MAD2L1 | BX-912            | -0.19078 | 2.6E-08  | 4085 |
| MAD2L1 | Belinostat        | -0.15508 | 1.48E-05 | 4085 |
| MAD2L1 | Bexarotene        | 0.034934 | 0.658801 | 4085 |
| MAD2L1 | Bicalutamide      | 0.08247  | 0.050404 | 4085 |
| MAD2L1 | Bleomycin         | 0.078092 | 0.115552 | 4085 |
| MAD2L1 | Bleomycin (50 uM) | 0.183449 | 1.45E-07 | 4085 |
| MAD2L1 | Bortezomib        | 0.088918 | 0.232389 | 4085 |
| MAD2L1 | Bosutinib         | 0.018359 | 0.776912 | 4085 |
| MAD2L1 | Bryostatins 1     | 0.095061 | 0.039577 | 4085 |
| MAD2L1 | CAL-101           | -0.05988 | 0.117105 | 4085 |
| MAD2L1 | CAY10603          | -0.18838 | 4.99E-08 | 4085 |
| MAD2L1 | CCT007093         | 0.121372 | 0.002413 | 4085 |
| MAD2L1 | CCT018159         | 0.049431 | 0.330721 | 4085 |
| MAD2L1 | CEP-701           | -0.0966  | 0.013774 | 4085 |
| MAD2L1 | CGP-082996        | 0.041074 | 0.697245 | 4085 |
| MAD2L1 | CGP-60474         | 0.055334 | 0.534524 | 4085 |
| MAD2L1 | CH5424802         | -0.02641 | 0.692129 | 4085 |
| MAD2L1 | CHIR-99021        | 0.076211 | 0.043136 | 4085 |
| MAD2L1 | CI-1040           | 0.125592 | 0.001538 | 4085 |
| MAD2L1 | CMK               | 0.005758 | 0.970753 | 4085 |
| MAD2L1 | CP466722          | -0.16937 | 1.01E-06 | 4085 |
| MAD2L1 | CP724714          | 0.081264 | 0.082101 | 4085 |
| MAD2L1 | CUDC-101          | -0.16147 | 5.21E-06 | 4085 |
| MAD2L1 | CX-5461           | -0.15528 | 1.07E-05 | 4085 |
| MAD2L1 | Camptothecin      | -0.09121 | 0.026709 | 4085 |
| MAD2L1 | Cetuximab         | 0.126233 | 0.000975 | 4085 |
| MAD2L1 | Cisplatin         | 0.043079 | 0.394636 | 4085 |
| MAD2L1 | Crizotinib        | -0.04015 | 0.802061 | 4085 |
| MAD2L1 | Cyclopamine       | 0.013397 | 0.924843 | 4085 |
| MAD2L1 | Cytarabine        | -0.03453 | 0.521228 | 4085 |
| MAD2L1 | DMOG              | -0.05379 | 0.231807 | 4085 |
| MAD2L1 | Dabrafenib        | 0.097002 | 0.015584 | 4085 |
| MAD2L1 | Dasatinib         | 0.1272   | 0.044093 | 4085 |
| MAD2L1 | Docetaxel         | 0.147027 | 6.12E-05 | 4085 |
| MAD2L1 | Doxorubicin       | 0.021175 | 0.77918  | 4085 |
| MAD2L1 | EHT 1864          | 0.053088 | 0.392082 | 4085 |
| MAD2L1 | EKB-569           | -0.02758 | 0.529699 | 4085 |
| MAD2L1 | EX-527            | 0.008579 | 0.952298 | 4085 |
| MAD2L1 | Elesclomol        | 0.019762 | 0.696677 | 4085 |
| MAD2L1 | Embelin           | 0.017169 | 0.815246 | 4085 |
| MAD2L1 | Epothilone B      | 0.062023 | 0.208686 | 4085 |
| MAD2L1 | Erlotinib         | 0.196862 | 0.002201 | 4085 |

|        |                    |          |          |      |
|--------|--------------------|----------|----------|------|
| MAD2L1 | Etoposide          | -0.08316 | 0.056194 | 4085 |
| MAD2L1 | FH535              | 0.09459  | 0.027752 | 4085 |
| MAD2L1 | FK866              | -0.20131 | 6.69E-09 | 4085 |
| MAD2L1 | FMK                | -0.00246 | 0.979478 | 4085 |
| MAD2L1 | FR-180204          | -0.00085 | 0.991918 | 4085 |
| MAD2L1 | FTI-277            | 0.183808 | 1.55E-06 | 4085 |
| MAD2L1 | Foretinib          | -0.10852 | 0.004318 | 4085 |
| MAD2L1 | GDC0449            | 0.033874 | 0.747895 | 4085 |
| MAD2L1 | GDC0941            | -0.00448 | 0.95236  | 4085 |
| MAD2L1 | GNF-2              | -0.01875 | 0.948211 | 4085 |
| MAD2L1 | GSK-650394         | -0.00764 | 0.940921 | 4085 |
| MAD2L1 | GSK1070916         | -0.19514 | 2.32E-08 | 4085 |
| MAD2L1 | GSK1904529A        | 0.107994 | 0.010607 | 4085 |
| MAD2L1 | GSK2126458         | -0.08762 | 0.017865 | 4085 |
| MAD2L1 | GSK269962A         | 0.019976 | 0.745088 | 4085 |
| MAD2L1 | GSK429286A         | -0.11817 | 0.001849 | 4085 |
| MAD2L1 | GSK690693          | -0.1547  | 1.18E-05 | 4085 |
| MAD2L1 | GW 441756          | 0.015902 | 0.961176 | 4085 |
| MAD2L1 | GW-2580            | 0.017343 | 0.977243 | 4085 |
| MAD2L1 | GW843682X          | -0.12777 | 0.092889 | 4085 |
| MAD2L1 | Gefitinib          | 0.187203 | 6.49E-07 | 4085 |
| MAD2L1 | Gemcitabine        | -0.0588  | 0.218351 | 4085 |
| MAD2L1 | Genentech Cpd 10   | -0.1656  | 2.29E-06 | 4085 |
| MAD2L1 | HG-5-113-01        | -0.05089 | 0.491732 | 4085 |
| MAD2L1 | HG-5-88-01         | 0.033923 | 0.844594 | 4085 |
| MAD2L1 | HG-6-64-1          | 0.044956 | 0.357321 | 4085 |
| MAD2L1 | I-BET-762          | -0.21548 | 2.02E-10 | 4085 |
| MAD2L1 | IOX2               | 0.041656 | 0.477119 | 4085 |
| MAD2L1 | IPA-3              | -0.10812 | 0.004489 | 4085 |
| MAD2L1 | Imatinib           | -0.05945 | 0.698493 | 4085 |
| MAD2L1 | Ispinesib Mesylate | -0.13179 | 0.000206 | 4085 |
| MAD2L1 | JNJ-26854165       | 0.048413 | 0.338433 | 4085 |
| MAD2L1 | JNK Inhibitor VIII | 0.116352 | 0.00377  | 4085 |
| MAD2L1 | JNK-9L             | 0.029278 | 0.639445 | 4085 |
| MAD2L1 | JQ1                | -0.01959 | 0.684846 | 4085 |
| MAD2L1 | JQ12               | -0.01629 | 0.799946 | 4085 |
| MAD2L1 | JW-7-24-1          | -0.15209 | 1.26E-05 | 4085 |
| MAD2L1 | JW-7-52-1          | 0.039346 | 0.724774 | 4085 |
| MAD2L1 | KIN001-055         | 0.051895 | 0.378837 | 4085 |
| MAD2L1 | KIN001-102         | -0.1606  | 3.5E-06  | 4085 |
| MAD2L1 | KIN001-135         | 0.14888  | 0.078974 | 4085 |
| MAD2L1 | KIN001-236         | -0.10987 | 0.002398 | 4085 |
| MAD2L1 | KIN001-244         | -0.13166 | 0.000224 | 4085 |
| MAD2L1 | KIN001-260         | -0.1427  | 5.18E-05 | 4085 |
| MAD2L1 | KIN001-266         | -0.06148 | 0.181342 | 4085 |
| MAD2L1 | KIN001-270         | -0.13858 | 0.000178 | 4085 |
| MAD2L1 | KU-55933           | -0.04728 | 0.430272 | 4085 |
| MAD2L1 | LAQ824             | -0.11707 | 0.001994 | 4085 |
| MAD2L1 | LFM-A13            | 0.076396 | 0.10622  | 4085 |
| MAD2L1 | LY317615           | -0.06265 | 0.143038 | 4085 |

|        |                    |          |          |      |
|--------|--------------------|----------|----------|------|
| MAD2L1 | Lapatinib          | 0.204067 | 0.000444 | 4085 |
| MAD2L1 | Lenalidomide       | -0.0463  | 0.52224  | 4085 |
| MAD2L1 | Linifanib          | -0.01081 | 0.870812 | 4085 |
| MAD2L1 | Lisitinib          | 0.009834 | 0.911937 | 4085 |
| MAD2L1 | MG-132             | 0.086419 | 0.292894 | 4085 |
| MAD2L1 | MK-2206            | -0.05952 | 0.232873 | 4085 |
| MAD2L1 | MLN4924            | 0.083366 | 0.111532 | 4085 |
| MAD2L1 | MP470              | -0.08261 | 0.048695 | 4085 |
| MAD2L1 | MPS-1-IN-1         | -0.1079  | 0.003222 | 4085 |
| MAD2L1 | MS-275             | -0.20469 | 0.002823 | 4085 |
| MAD2L1 | Masitinib          | -0.12544 | 0.000527 | 4085 |
| MAD2L1 | Methotrexate       | -0.17566 | 9.64E-07 | 4085 |
| MAD2L1 | Midostaurin        | 0.081347 | 0.054549 | 4085 |
| MAD2L1 | Mitomycin C        | -0.03106 | 0.577048 | 4085 |
| MAD2L1 | NG-25              | -0.1653  | 1.94E-06 | 4085 |
| MAD2L1 | NPK76-II-72-1      | -0.27992 | 4.62E-17 | 4085 |
| MAD2L1 | NSC-207895         | -0.13744 | 0.000495 | 4085 |
| MAD2L1 | NSC-87877          | 0.103191 | 0.040356 | 4085 |
| MAD2L1 | NU-7441            | 0.002418 | 0.982701 | 4085 |
| MAD2L1 | Navitoclax         | -0.24085 | 9.56E-12 | 4085 |
| MAD2L1 | Nilotinib          | -0.09969 | 0.025599 | 4085 |
| MAD2L1 | Nutlin-3a (-)      | 0.102704 | 0.015977 | 4085 |
| MAD2L1 | OSI-027            | -0.1341  | 0.000148 | 4085 |
| MAD2L1 | OSI-930            | -0.07965 | 0.036866 | 4085 |
| MAD2L1 | OSU-03012          | -0.00431 | 0.9499   | 4085 |
| MAD2L1 | Obatoclax Mesylate | -0.00626 | 0.917902 | 4085 |
| MAD2L1 | Olaparib           | 0.065351 | 0.126633 | 4085 |
| MAD2L1 | PAC-1              | -0.14346 | 0.0002   | 4085 |
| MAD2L1 | PD-0325901         | 0.213277 | 7.18E-09 | 4085 |
| MAD2L1 | PD-0332991         | 0.047332 | 0.392068 | 4085 |
| MAD2L1 | PD-173074          | -0.02255 | 0.903328 | 4085 |
| MAD2L1 | PF-4708671         | 0.076719 | 0.363137 | 4085 |
| MAD2L1 | PF-562271          | 0.067711 | 0.197443 | 4085 |
| MAD2L1 | PFI-1              | 0.028081 | 0.595591 | 4085 |
| MAD2L1 | PHA-665752         | 0.103659 | 0.411373 | 4085 |
| MAD2L1 | PHA-793887         | -0.18083 | 1.29E-07 | 4085 |
| MAD2L1 | PI-103             | -0.14234 | 5.36E-05 | 4085 |
| MAD2L1 | PIK-93             | -0.18795 | 4.05E-08 | 4085 |
| MAD2L1 | PLX4720            | 0.108863 | 0.004326 | 4085 |
| MAD2L1 | Paclitaxel         | 0.051276 | 0.660325 | 4085 |
| MAD2L1 | Parthenolide       | -0.05891 | 0.572581 | 4085 |
| MAD2L1 | Pazopanib          | 0.066935 | 0.191483 | 4085 |
| MAD2L1 | Phenformin         | -0.09988 | 0.006313 | 4085 |
| MAD2L1 | Pyrimethamine      | -0.04225 | 0.731438 | 4085 |
| MAD2L1 | QL-VIII-58         | 0.086654 | 0.212076 | 4085 |
| MAD2L1 | QL-X-138           | -0.1539  | 1.32E-05 | 4085 |
| MAD2L1 | QL-XI-92           | -0.16525 | 2.21E-06 | 4085 |
| MAD2L1 | QL-XII-47          | -0.10588 | 0.005337 | 4085 |
| MAD2L1 | QL-XII-61          | -0.1425  | 0.013576 | 4085 |
| MAD2L1 | QS11               | -0.06822 | 0.226392 | 4085 |



|        |                     |          |          |      |
|--------|---------------------|----------|----------|------|
| MAD2L1 | RDEA119             | 0.23485  | 4.76E-12 | 4085 |
| MAD2L1 | RO-3306             | 0.116601 | 0.003796 | 4085 |
| MAD2L1 | Rapamycin           | 0.004021 | 0.983206 | 4085 |
| MAD2L1 | Roscovitine         | 0.068905 | 0.663652 | 4085 |
| MAD2L1 | Ruxolitinib         | -0.04794 | 0.340388 | 4085 |
| MAD2L1 | S-Trityl-L-cysteine | -0.05406 | 0.528138 | 4085 |
| MAD2L1 | SB 216763           | 0.075927 | 0.112033 | 4085 |
| MAD2L1 | SB 505124           | 0.068144 | 0.301048 | 4085 |
| MAD2L1 | SB52334             | -0.02275 | 0.677181 | 4085 |
| MAD2L1 | SB590885            | 0.130461 | 0.001965 | 4085 |
| MAD2L1 | SGC0946             | 0.085464 | 0.062646 | 4085 |
| MAD2L1 | SL 0101-1           | 0.101122 | 0.172468 | 4085 |
| MAD2L1 | SN-38               | -8.9E-05 | 0.998946 | 4085 |
| MAD2L1 | SNX-2112            | -0.14808 | 2.63E-05 | 4085 |
| MAD2L1 | STF-62247           | -0.07603 | 0.054033 | 4085 |
| MAD2L1 | Salubrinal          | -0.03566 | 0.705139 | 4085 |
| MAD2L1 | Saracatinib         | 0.049497 | 0.571783 | 4085 |
| MAD2L1 | Shikonin            | -0.02528 | 0.670571 | 4085 |
| MAD2L1 | Sorafenib           | 0.007304 | 0.959139 | 4085 |
| MAD2L1 | Sunitinib           | -0.03152 | 0.712743 | 4085 |
| MAD2L1 | T0901317            | -0.09419 | 0.01571  | 4085 |
| MAD2L1 | TAE684              | 0.027736 | 0.840081 | 4085 |
| MAD2L1 | TAK-715             | -0.11209 | 0.001675 | 4085 |
| MAD2L1 | TG101348            | -0.17452 | 4.43E-07 | 4085 |
| MAD2L1 | TGX221              | 0.228154 | 7.63E-05 | 4085 |
| MAD2L1 | THZ-2-102-1         | -0.2065  | 2.5E-09  | 4085 |
| MAD2L1 | THZ-2-49            | -0.12017 | 0.000847 | 4085 |
| MAD2L1 | TL-1-85             | -0.16817 | 1.33E-06 | 4085 |
| MAD2L1 | TL-2-105            | -0.15836 | 8.26E-06 | 4085 |
| MAD2L1 | TPCA-1              | -0.19434 | 1.32E-08 | 4085 |
| MAD2L1 | TW 37               | -0.05364 | 0.238518 | 4085 |
| MAD2L1 | Talazoparib         | 0.010996 | 0.839223 | 4085 |
| MAD2L1 | Tamoxifen           | 0.077744 | 0.383244 | 4085 |
| MAD2L1 | Temozolomide        | 0.01354  | 0.884996 | 4085 |
| MAD2L1 | Temsirolimus        | 0.004421 | 0.945142 | 4085 |
| MAD2L1 | Thapsigargin        | 0.007631 | 0.933586 | 4085 |
| MAD2L1 | Tipifarnib          | 0.047963 | 0.454266 | 4085 |
| MAD2L1 | Tivozanib           | -0.0511  | 0.359255 | 4085 |
| MAD2L1 | Trametinib          | 0.276121 | 0        | 4085 |
| MAD2L1 | Tubastatin A        | -0.16775 | 1.31E-06 | 4085 |
| MAD2L1 | UNC0638             | -0.13188 | 0.000126 | 4085 |
| MAD2L1 | UNC1215             | 0.147012 | 0.000893 | 4085 |
| MAD2L1 | VNLG/124            | -0.03875 | 0.371978 | 4085 |
| MAD2L1 | VX-11e              | 0.064319 | 0.155248 | 4085 |
| MAD2L1 | VX-680              | -0.09207 | 0.287615 | 4085 |
| MAD2L1 | VX-702              | -0.00524 | 0.986254 | 4085 |
| MAD2L1 | Veliparib           | 0.056829 | 0.382325 | 4085 |
| MAD2L1 | Vinblastine         | -0.06636 | 0.123512 | 4085 |
| MAD2L1 | Vinorelbine         | -0.02162 | 0.731589 | 4085 |
| MAD2L1 | Vorinostat          | -0.2402  | 1E-11    | 4085 |

|        |                    |          |          |       |
|--------|--------------------|----------|----------|-------|
| MAD2L1 | WH-4-023           | 0.099722 | 0.170331 | 4085  |
| MAD2L1 | WZ-1-84            | 0.169832 | 0.010802 | 4085  |
| MAD2L1 | WZ3105             | -0.15225 | 1.17E-05 | 4085  |
| MAD2L1 | XAV939             | 0.112949 | 0.0027   | 4085  |
| MAD2L1 | XL-184             | -0.03833 | 0.431499 | 4085  |
| MAD2L1 | XMD11-85h          | 0.014065 | 0.951462 | 4085  |
| MAD2L1 | XMD13-2            | -0.15141 | 1.44E-05 | 4085  |
| MAD2L1 | XMD14-99           | -0.06301 | 0.099485 | 4085  |
| MAD2L1 | XMD15-27           | -0.04329 | 0.369072 | 4085  |
| MAD2L1 | XMD8-85            | 0.026805 | 0.785431 | 4085  |
| MAD2L1 | XMD8-92            | -0.01216 | 0.937957 | 4085  |
| MAD2L1 | Y-39983            | -0.15869 | 7.93E-06 | 4085  |
| MAD2L1 | YK 4-279           | 0.028208 | 0.637799 | 4085  |
| MAD2L1 | YM155              | -0.07458 | 0.1115   | 4085  |
| MAD2L1 | YM201636           | -0.15163 | 1.75E-05 | 4085  |
| MAD2L1 | Z-LLN1e-CHO        | 0.061885 | 0.415844 | 4085  |
| MAD2L1 | ZG-10              | -0.08027 | 0.207867 | 4085  |
| MAD2L1 | ZM-447439          | -0.0986  | 0.019781 | 4085  |
| MAD2L1 | ZSTK474            | -0.12001 | 0.00075  | 4085  |
| MAD2L1 | Zibotentan         | 0.024184 | 0.943268 | 4085  |
| MAD2L1 | piperlongumine     | 0.078597 | 0.05646  | 4085  |
| MAD2L1 | rTRAIL             | 0.040297 | 0.588777 | 4085  |
| MAD2L1 | selumetinib        | 0.242902 | 8.56E-13 | 4085  |
| MCM10  | (5Z)-7-oxozeaenol  | 0.125199 | 0.000837 | 55388 |
| MCM10  | 17-AAG             | 0.236548 | 2.76E-11 | 55388 |
| MCM10  | 5-Fluorouracil     | -0.1467  | 3.36E-05 | 55388 |
| MCM10  | 681640             | 0.021061 | 0.755974 | 55388 |
| MCM10  | A-443654           | -0.02478 | 0.914276 | 55388 |
| MCM10  | A-770041           | 0.014853 | 0.887936 | 55388 |
| MCM10  | AC220              | -0.10082 | 0.01578  | 55388 |
| MCM10  | AG-014699          | 0.049315 | 0.252475 | 55388 |
| MCM10  | AICAR              | -0.21551 | 5.01E-09 | 55388 |
| MCM10  | AKT inhibitor VIII | 0.098742 | 0.018829 | 55388 |
| MCM10  | AMG-706            | 0.046047 | 0.441565 | 55388 |
| MCM10  | AP-24534           | -0.14255 | 0.000172 | 55388 |
| MCM10  | AR-42              | -0.22358 | 7.47E-11 | 55388 |
| MCM10  | AS601245           | 0.065382 | 0.196904 | 55388 |
| MCM10  | AS605240           | -0.06799 | 0.101647 | 55388 |
| MCM10  | AT-7519            | -0.20571 | 2.01E-09 | 55388 |
| MCM10  | ATRA               | -0.10265 | 0.017573 | 55388 |
| MCM10  | AUY922             | 0.015334 | 0.812694 | 55388 |
| MCM10  | AZ628              | 0.076234 | 0.302826 | 55388 |
| MCM10  | AZD6482            | 0.042146 | 0.375882 | 55388 |
| MCM10  | AZD7762            | -0.222   | 1.64E-09 | 55388 |
| MCM10  | AZD8055            | -0.19415 | 1.72E-07 | 55388 |
| MCM10  | Afatinib           | 0.136569 | 0.000114 | 55388 |
| MCM10  | Axitinib           | -0.17011 | 5.25E-05 | 55388 |
| MCM10  | BAY 61-3606        | -0.10916 | 0.005112 | 55388 |
| MCM10  | BEZ235             | 0.028666 | 0.592093 | 55388 |
| MCM10  | BHG712             | -0.20312 | 3.89E-09 | 55388 |

|       |                   |          |          |       |
|-------|-------------------|----------|----------|-------|
| MCM10 | BI-2536           | -0.10895 | 0.231374 | 55388 |
| MCM10 | BIRB 0796         | 0.076593 | 0.112042 | 55388 |
| MCM10 | BIX02189          | -0.22504 | 6.25E-11 | 55388 |
| MCM10 | BMS-509744        | 0.048434 | 0.616367 | 55388 |
| MCM10 | BMS-536924        | -0.0366  | 0.609735 | 55388 |
| MCM10 | BMS-708163        | 0.125303 | 0.00108  | 55388 |
| MCM10 | BMS-754807        | 0.040899 | 0.465249 | 55388 |
| MCM10 | BMS345541         | -0.25306 | 1.02E-13 | 55388 |
| MCM10 | BX-795            | -0.13234 | 0.001005 | 55388 |
| MCM10 | BX-912            | -0.26525 | 3.19E-15 | 55388 |
| MCM10 | Belinostat        | -0.17887 | 4.74E-07 | 55388 |
| MCM10 | Bexarotene        | 0.009216 | 0.934816 | 55388 |
| MCM10 | Bicalutamide      | 0.074209 | 0.081823 | 55388 |
| MCM10 | Bleomycin         | 0.045246 | 0.417356 | 55388 |
| MCM10 | Bleomycin (50 uM) | 0.168224 | 1.56E-06 | 55388 |
| MCM10 | Bortezomib        | 0.028977 | 0.759701 | 55388 |
| MCM10 | Bosutinib         | -0.05668 | 0.263534 | 55388 |
| MCM10 | Bryostatins 1     | 0.11376  | 0.01223  | 55388 |
| MCM10 | CAL-101           | -0.14179 | 7.83E-05 | 55388 |
| MCM10 | CAY10603          | -0.2187  | 1.79E-10 | 55388 |
| MCM10 | CCT007093         | 0.120274 | 0.002638 | 55388 |
| MCM10 | CCT018159         | -0.00035 | 0.995455 | 55388 |
| MCM10 | CEP-701           | -0.14377 | 0.000156 | 55388 |
| MCM10 | CGP-082996        | 0.021067 | 0.864746 | 55388 |
| MCM10 | CGP-60474         | 0.055188 | 0.535658 | 55388 |
| MCM10 | CH5424802         | -0.05389 | 0.327065 | 55388 |
| MCM10 | CHIR-99021        | 0.084418 | 0.023983 | 55388 |
| MCM10 | CI-1040           | 0.126388 | 0.001425 | 55388 |
| MCM10 | CMK               | -0.01196 | 0.937058 | 55388 |
| MCM10 | CP466722          | -0.27038 | 1.11E-15 | 55388 |
| MCM10 | CP724714          | 0.054801 | 0.286854 | 55388 |
| MCM10 | CUDC-101          | -0.18383 | 1.74E-07 | 55388 |
| MCM10 | CX-5461           | -0.22685 | 5E-11    | 55388 |
| MCM10 | Camptothecin      | -0.11039 | 0.00592  | 55388 |
| MCM10 | Cetuximab         | 0.137282 | 0.000307 | 55388 |
| MCM10 | Cisplatin         | -0.00133 | 0.983987 | 55388 |
| MCM10 | Crizotinib        | -0.07948 | 0.520733 | 55388 |
| MCM10 | Cyclopamine       | 0.044019 | 0.706818 | 55388 |
| MCM10 | Cytarabine        | -0.07474 | 0.109662 | 55388 |
| MCM10 | DMOG              | -0.10919 | 0.007145 | 55388 |
| MCM10 | Dabrafenib        | 0.137789 | 0.000341 | 55388 |
| MCM10 | Dasatinib         | 0.072035 | 0.288957 | 55388 |
| MCM10 | Docetaxel         | 0.174329 | 1.69E-06 | 55388 |
| MCM10 | Doxorubicin       | 0.004782 | 0.955517 | 55388 |
| MCM10 | EHT 1864          | -0.00653 | 0.944818 | 55388 |
| MCM10 | EKB-569           | -0.12758 | 0.00066  | 55388 |
| MCM10 | EX-527            | 0.02422  | 0.845476 | 55388 |
| MCM10 | Elesclomol        | -0.00506 | 0.925595 | 55388 |
| MCM10 | Embelin           | 0.046181 | 0.428549 | 55388 |
| MCM10 | Epothilone B      | 0.052187 | 0.300612 | 55388 |

|       |                    |          |          |       |
|-------|--------------------|----------|----------|-------|
| MCM10 | Erlotinib          | 0.148712 | 0.026894 | 55388 |
| MCM10 | Etoposide          | -0.09881 | 0.020141 | 55388 |
| MCM10 | FH535              | 0.0972   | 0.023335 | 55388 |
| MCM10 | FK866              | -0.24888 | 4.21E-13 | 55388 |
| MCM10 | FMK                | -0.06243 | 0.316894 | 55388 |
| MCM10 | FR-180204          | -0.06469 | 0.180868 | 55388 |
| MCM10 | FTI-277            | 0.186391 | 1.06E-06 | 55388 |
| MCM10 | Foretinib          | -0.1603  | 1.24E-05 | 55388 |
| MCM10 | GDC0449            | -0.0202  | 0.866977 | 55388 |
| MCM10 | GDC0941            | -0.05969 | 0.248968 | 55388 |
| MCM10 | GNF-2              | -0.06584 | 0.769374 | 55388 |
| MCM10 | GSK-650394         | -0.01749 | 0.850771 | 55388 |
| MCM10 | GSK1070916         | -0.2834  | 1.03E-16 | 55388 |
| MCM10 | GSK1904529A        | 0.089555 | 0.038002 | 55388 |
| MCM10 | GSK2126458         | -0.15519 | 1.35E-05 | 55388 |
| MCM10 | GSK269962A         | -0.01719 | 0.785618 | 55388 |
| MCM10 | GSK429286A         | -0.19349 | 1.06E-07 | 55388 |
| MCM10 | GSK690693          | -0.20919 | 1.63E-09 | 55388 |
| MCM10 | GW 441756          | -0.03806 | 0.846614 | 55388 |
| MCM10 | GW-2580            | -0.01915 | 0.969081 | 55388 |
| MCM10 | GW843682X          | -0.14261 | 0.055411 | 55388 |
| MCM10 | Gefitinib          | 0.143515 | 0.000197 | 55388 |
| MCM10 | Gemcitabine        | -0.07336 | 0.112278 | 55388 |
| MCM10 | Genentech Cpd 10   | -0.23896 | 3.36E-12 | 55388 |
| MCM10 | HG-5-113-01        | -0.12459 | 0.045907 | 55388 |
| MCM10 | HG-5-88-01         | -0.00512 | 0.983427 | 55388 |
| MCM10 | HG-6-64-1          | -0.00642 | 0.919017 | 55388 |
| MCM10 | I-BET-762          | -0.27546 | 1.68E-16 | 55388 |
| MCM10 | IOX2               | 0.09075  | 0.076795 | 55388 |
| MCM10 | IPA-3              | -0.14849 | 6.71E-05 | 55388 |
| MCM10 | Imatinib           | -0.13618 | 0.131427 | 55388 |
| MCM10 | Ispinesib Mesylate | -0.16861 | 1.46E-06 | 55388 |
| MCM10 | JNJ-26854165       | 0.064917 | 0.174851 | 55388 |
| MCM10 | JNK Inhibitor VIII | 0.087534 | 0.033494 | 55388 |
| MCM10 | JNK-9L             | -0.02151 | 0.746643 | 55388 |
| MCM10 | JQ1                | -0.05648 | 0.18273  | 55388 |
| MCM10 | JQ12               | -0.06411 | 0.211985 | 55388 |
| MCM10 | JW-7-24-1          | -0.22533 | 3.92E-11 | 55388 |
| MCM10 | JW-7-52-1          | -0.01978 | 0.877446 | 55388 |
| MCM10 | KIN001-055         | 0.005334 | 0.954474 | 55388 |
| MCM10 | KIN001-102         | -0.25406 | 6.03E-14 | 55388 |
| MCM10 | KIN001-135         | 0.133533 | 0.124167 | 55388 |
| MCM10 | KIN001-236         | -0.18209 | 2.11E-07 | 55388 |
| MCM10 | KIN001-244         | -0.20825 | 2.16E-09 | 55388 |
| MCM10 | KIN001-260         | -0.19146 | 3.49E-08 | 55388 |
| MCM10 | KIN001-266         | -0.09852 | 0.023055 | 55388 |
| MCM10 | KIN001-270         | -0.1765  | 1.27E-06 | 55388 |
| MCM10 | KU-55933           | -0.10481 | 0.032202 | 55388 |
| MCM10 | LAQ824             | -0.17251 | 2.88E-06 | 55388 |
| MCM10 | LFM-A13            | 0.074266 | 0.1173   | 55388 |

|       |                    |          |          |       |
|-------|--------------------|----------|----------|-------|
| MCM10 | LY317615           | -0.11284 | 0.004537 | 55388 |
| MCM10 | Lapatinib          | 0.167422 | 0.004908 | 55388 |
| MCM10 | Lenalidomide       | -0.06687 | 0.29361  | 55388 |
| MCM10 | Linifanib          | -0.06429 | 0.1779   | 55388 |
| MCM10 | Lisitinib          | 0.023111 | 0.757405 | 55388 |
| MCM10 | MG-132             | 0.029261 | 0.783809 | 55388 |
| MCM10 | MK-2206            | -0.11879 | 0.008644 | 55388 |
| MCM10 | MLN4924            | 0.038871 | 0.511926 | 55388 |
| MCM10 | MP470              | -0.12164 | 0.003422 | 55388 |
| MCM10 | MPS-1-IN-1         | -0.16043 | 7.36E-06 | 55388 |
| MCM10 | MS-275             | -0.20203 | 0.003238 | 55388 |
| MCM10 | Masitinib          | -0.19257 | 4.56E-08 | 55388 |
| MCM10 | Methotrexate       | -0.23365 | 3.77E-11 | 55388 |
| MCM10 | Midostaurin        | 0.061487 | 0.159783 | 55388 |
| MCM10 | Mitomycin C        | -0.07514 | 0.109524 | 55388 |
| MCM10 | NG-25              | -0.24219 | 1.08E-12 | 55388 |
| MCM10 | NPK76-II-72-1      | -0.3404  | 3.02E-25 | 55388 |
| MCM10 | NSC-207895         | -0.16049 | 4.2E-05  | 55388 |
| MCM10 | NSC-87877          | 0.115755 | 0.02088  | 55388 |
| MCM10 | NU-7441            | -0.0337  | 0.663646 | 55388 |
| MCM10 | Navitoclax         | -0.32385 | 7.2E-21  | 55388 |
| MCM10 | Nilotinib          | -0.1586  | 0.000135 | 55388 |
| MCM10 | Nutlin-3a (-)      | -0.00877 | 0.884933 | 55388 |
| MCM10 | OSI-027            | -0.19828 | 1.07E-08 | 55388 |
| MCM10 | OSI-930            | -0.16283 | 7.02E-06 | 55388 |
| MCM10 | OSU-03012          | -0.0509  | 0.300536 | 55388 |
| MCM10 | Obatoclax Mesylate | -0.03744 | 0.448508 | 55388 |
| MCM10 | Olaparib           | 0.037321 | 0.411364 | 55388 |
| MCM10 | PAC-1              | -0.15239 | 7.09E-05 | 55388 |
| MCM10 | PD-0325901         | 0.222071 | 1.57E-09 | 55388 |
| MCM10 | PD-0332991         | -0.05641 | 0.288598 | 55388 |
| MCM10 | PD-173074          | -0.05404 | 0.688988 | 55388 |
| MCM10 | PF-4708671         | 0.016876 | 0.901566 | 55388 |
| MCM10 | PF-562271          | 0.057354 | 0.287134 | 55388 |
| MCM10 | PFI-1              | -0.01851 | 0.741847 | 55388 |
| MCM10 | PHA-665752         | 0.063457 | 0.659103 | 55388 |
| MCM10 | PHA-793887         | -0.22954 | 1.16E-11 | 55388 |
| MCM10 | PI-103             | -0.20688 | 2.19E-09 | 55388 |
| MCM10 | PIK-93             | -0.27002 | 8.74E-16 | 55388 |
| MCM10 | PLX4720            | 0.154881 | 2.21E-05 | 55388 |
| MCM10 | Paclitaxel         | 0.027904 | 0.835741 | 55388 |
| MCM10 | Parthenolide       | -0.03644 | 0.753023 | 55388 |
| MCM10 | Pazopanib          | 0.045034 | 0.416541 | 55388 |
| MCM10 | Phenformin         | -0.11982 | 0.000938 | 55388 |
| MCM10 | Pyrimethamine      | -0.05094 | 0.668352 | 55388 |
| MCM10 | QL-VIII-58         | 0.028036 | 0.757286 | 55388 |
| MCM10 | QL-X-138           | -0.21529 | 5.3E-10  | 55388 |
| MCM10 | QL-XI-92           | -0.23808 | 3.21E-12 | 55388 |
| MCM10 | QL-XII-47          | -0.13342 | 0.000352 | 55388 |
| MCM10 | QL-XII-61          | -0.12805 | 0.02888  | 55388 |

|       |                     |          |          |       |
|-------|---------------------|----------|----------|-------|
| MCM10 | QS11                | -0.08811 | 0.102439 | 55388 |
| MCM10 | RDEA119             | 0.240693 | 1.29E-12 | 55388 |
| MCM10 | RO-3306             | 0.121048 | 0.0026   | 55388 |
| MCM10 | Rapamycin           | -0.01103 | 0.94959  | 55388 |
| MCM10 | Roscovitine         | 0.115608 | 0.387725 | 55388 |
| MCM10 | Ruxolitinib         | -0.09517 | 0.029258 | 55388 |
| MCM10 | S-Trityl-L-cysteine | -0.09726 | 0.20027  | 55388 |
| MCM10 | SB 216763           | 0.075786 | 0.112814 | 55388 |
| MCM10 | SB 505124           | 0.05156  | 0.464347 | 55388 |
| MCM10 | SB52334             | -0.02735 | 0.60624  | 55388 |
| MCM10 | SB590885            | 0.171361 | 1.79E-05 | 55388 |
| MCM10 | SGC0946             | 0.098728 | 0.027998 | 55388 |
| MCM10 | SL 0101-1           | 0.061282 | 0.404147 | 55388 |
| MCM10 | SN-38               | -0.01257 | 0.817003 | 55388 |
| MCM10 | SNX-2112            | -0.20525 | 2.94E-09 | 55388 |
| MCM10 | STF-62247           | -0.13267 | 0.000481 | 55388 |
| MCM10 | Salubrinal          | -0.06917 | 0.4136   | 55388 |
| MCM10 | Saracatinib         | -0.02053 | 0.833059 | 55388 |
| MCM10 | Shikonin            | -0.06605 | 0.183355 | 55388 |
| MCM10 | Sorafenib           | -0.01157 | 0.934528 | 55388 |
| MCM10 | Sunitinib           | -0.08964 | 0.207948 | 55388 |
| MCM10 | T0901317            | -0.12929 | 0.000638 | 55388 |
| MCM10 | TAE684              | 0.031576 | 0.814975 | 55388 |
| MCM10 | TAK-715             | -0.1824  | 1.64E-07 | 55388 |
| MCM10 | TG101348            | -0.25383 | 6.34E-14 | 55388 |
| MCM10 | TGX221              | 0.208716 | 0.000342 | 55388 |
| MCM10 | THZ-2-102-1         | -0.24157 | 2.07E-12 | 55388 |
| MCM10 | THZ-2-49            | -0.1336  | 0.000195 | 55388 |
| MCM10 | TL-1-85             | -0.23385 | 7.4E-12  | 55388 |
| MCM10 | TL-2-105            | -0.21287 | 1.05E-09 | 55388 |
| MCM10 | TPCA-1              | -0.28523 | 1.49E-17 | 55388 |
| MCM10 | TW 37               | -0.08621 | 0.038593 | 55388 |
| MCM10 | Talazoparib         | -0.01627 | 0.755926 | 55388 |
| MCM10 | Tamoxifen           | 0.065675 | 0.50408  | 55388 |
| MCM10 | Temozolomide        | 0.017364 | 0.844282 | 55388 |
| MCM10 | Temsirolimus        | -0.04674 | 0.350381 | 55388 |
| MCM10 | Thapsigargin        | -0.02749 | 0.710005 | 55388 |
| MCM10 | Tipifarnib          | 0.005277 | 0.955803 | 55388 |
| MCM10 | Tivozanib           | -0.125   | 0.004263 | 55388 |
| MCM10 | Trametinib          | 0.270009 | 0        | 55388 |
| MCM10 | Tubastatin A        | -0.21677 | 2.35E-10 | 55388 |
| MCM10 | UNC0638             | -0.16151 | 2.06E-06 | 55388 |
| MCM10 | UNC1215             | 0.108384 | 0.015074 | 55388 |
| MCM10 | VNLG/124            | -0.10664 | 0.005683 | 55388 |
| MCM10 | VX-11e              | 0.007093 | 0.912304 | 55388 |
| MCM10 | VX-680              | -0.12241 | 0.133312 | 55388 |
| MCM10 | VX-702              | -0.0459  | 0.813357 | 55388 |
| MCM10 | Veliparib           | 0.01713  | 0.835065 | 55388 |
| MCM10 | Vinblastine         | -0.093   | 0.024656 | 55388 |
| MCM10 | Vinorelbine         | -0.05292 | 0.319997 | 55388 |

|       |                    |          |          |       |
|-------|--------------------|----------|----------|-------|
| MCM10 | Vorinostat         | -0.32309 | 8.34E-21 | 55388 |
| MCM10 | WH-4-023           | 0.054728 | 0.499722 | 55388 |
| MCM10 | WZ-1-84            | 0.088637 | 0.237184 | 55388 |
| MCM10 | WZ3105             | -0.2346  | 5.18E-12 | 55388 |
| MCM10 | XAV939             | 0.099162 | 0.008952 | 55388 |
| MCM10 | XL-184             | -0.08351 | 0.050681 | 55388 |
| MCM10 | XMD11-85h          | 0.004256 | 0.986281 | 55388 |
| MCM10 | XMD13-2            | -0.19113 | 2.96E-08 | 55388 |
| MCM10 | XMD14-99           | -0.11442 | 0.001775 | 55388 |
| MCM10 | XMD15-27           | -0.10479 | 0.012029 | 55388 |
| MCM10 | XMD8-85            | 0.00332  | 0.975412 | 55388 |
| MCM10 | XMD8-92            | -0.01898 | 0.893296 | 55388 |
| MCM10 | Y-39983            | -0.23332 | 1.81E-11 | 55388 |
| MCM10 | YK 4-279           | 0.016094 | 0.808854 | 55388 |
| MCM10 | YM155              | -0.06225 | 0.200304 | 55388 |
| MCM10 | YM201636           | -0.22636 | 5.72E-11 | 55388 |
| MCM10 | Z-LLN1e-CHO        | -0.0168  | 0.854475 | 55388 |
| MCM10 | ZG-10              | -0.10241 | 0.093354 | 55388 |
| MCM10 | ZM-447439          | -0.17955 | 7.08E-06 | 55388 |
| MCM10 | ZSTK474            | -0.19229 | 3.13E-08 | 55388 |
| MCM10 | Zibotentan         | -0.04998 | 0.812258 | 55388 |
| MCM10 | piperlongumine     | 0.064251 | 0.129298 | 55388 |
| MCM10 | rTRAIL             | 0.024208 | 0.772033 | 55388 |
| MCM10 | selumetinib        | 0.260097 | 1.99E-14 | 55388 |
| MND1  | (5Z)-7-Oxozeaenol  | 0.08886  | 0.022163 | 84057 |
| MND1  | 17-AAG             | 0.249231 | 1.98E-12 | 84057 |
| MND1  | 5-Fluorouracil     | -0.19635 | 1.74E-08 | 84057 |
| MND1  | 681640             | 0.024066 | 0.716202 | 84057 |
| MND1  | A-443654           | -0.04242 | 0.824313 | 84057 |
| MND1  | A-770041           | -0.06463 | 0.426196 | 84057 |
| MND1  | AC220              | -0.06624 | 0.137873 | 84057 |
| MND1  | AG-014699          | 0.084724 | 0.039196 | 84057 |
| MND1  | AICAR              | -0.19922 | 7.84E-08 | 84057 |
| MND1  | AKT inhibitor VIII | 0.119633 | 0.00378  | 84057 |
| MND1  | AMG-706            | 0.090616 | 0.073497 | 84057 |
| MND1  | AP-24534           | -0.16718 | 7.58E-06 | 84057 |
| MND1  | AR-42              | -0.27324 | 7.99E-16 | 84057 |
| MND1  | AS601245           | 0.030376 | 0.606052 | 84057 |
| MND1  | AS605240           | -0.10584 | 0.007307 | 84057 |
| MND1  | AT-7519            | -0.26007 | 1.61E-14 | 84057 |
| MND1  | ATRA               | -0.11429 | 0.007004 | 84057 |
| MND1  | AUY922             | -0.02605 | 0.657743 | 84057 |
| MND1  | AZ628              | 0.067111 | 0.376263 | 84057 |
| MND1  | AZD6482            | 0.025151 | 0.638425 | 84057 |
| MND1  | AZD7762            | -0.25962 | 1E-12    | 84057 |
| MND1  | AZD8055            | -0.23199 | 2.61E-10 | 84057 |
| MND1  | Afatinib           | 0.203442 | 3.27E-09 | 84057 |
| MND1  | Axitinib           | -0.10886 | 0.015433 | 84057 |
| MND1  | BAY 61-3606        | -0.15217 | 6.09E-05 | 84057 |
| MND1  | BEZ235             | -0.01033 | 0.864493 | 84057 |

|      |                   |          |          |       |
|------|-------------------|----------|----------|-------|
| MND1 | BHG712            | -0.26096 | 1.59E-14 | 84057 |
| MND1 | BI-2536           | -0.14197 | 0.103639 | 84057 |
| MND1 | BIRB 0796         | 0.110417 | 0.016391 | 84057 |
| MND1 | BIX02189          | -0.25522 | 7.92E-14 | 84057 |
| MND1 | BMS-509744        | 0.037023 | 0.712139 | 84057 |
| MND1 | BMS-536924        | -0.00367 | 0.969781 | 84057 |
| MND1 | BMS-708163        | 0.149221 | 8.99E-05 | 84057 |
| MND1 | BMS-754807        | 0.05237  | 0.3291   | 84057 |
| MND1 | BMS345541         | -0.28548 | 2.38E-17 | 84057 |
| MND1 | BX-795            | -0.12577 | 0.001876 | 84057 |
| MND1 | BX-912            | -0.30154 | 1.37E-19 | 84057 |
| MND1 | Belinostat        | -0.24023 | 6.05E-12 | 84057 |
| MND1 | Bexarotene        | -0.01081 | 0.91994  | 84057 |
| MND1 | Bicalutamide      | 0.108465 | 0.008002 | 84057 |
| MND1 | Bleomycin         | 0.011347 | 0.875528 | 84057 |
| MND1 | Bleomycin (50 uM) | 0.179404 | 2.8E-07  | 84057 |
| MND1 | Bortezomib        | 0.075596 | 0.325974 | 84057 |
| MND1 | Bosutinib         | -0.0699  | 0.147802 | 84057 |
| MND1 | Bryostatins 1     | 0.096092 | 0.037129 | 84057 |
| MND1 | CAL-101           | -0.17822 | 4.67E-07 | 84057 |
| MND1 | CAY10603          | -0.26955 | 1.83E-15 | 84057 |
| MND1 | CCT007093         | 0.125742 | 0.001639 | 84057 |
| MND1 | CCT018159         | 0.006015 | 0.932805 | 84057 |
| MND1 | CEP-701           | -0.20256 | 4.46E-08 | 84057 |
| MND1 | CGP-082996        | -0.07354 | 0.41877  | 84057 |
| MND1 | CGP-60474         | -0.00953 | 0.936125 | 84057 |
| MND1 | CH5424802         | -0.02419 | 0.721986 | 84057 |
| MND1 | CHIR-99021        | 0.069762 | 0.066338 | 84057 |
| MND1 | CI-1040           | 0.075122 | 0.074592 | 84057 |
| MND1 | CMK               | -0.06519 | 0.566993 | 84057 |
| MND1 | CP466722          | -0.2842  | 2.66E-17 | 84057 |
| MND1 | CP724714          | 0.085721 | 0.062612 | 84057 |
| MND1 | CUDC-101          | -0.24778 | 7.35E-13 | 84057 |
| MND1 | CX-5461           | -0.24994 | 3.45E-13 | 84057 |
| MND1 | Camptothecin      | -0.15849 | 4.44E-05 | 84057 |
| MND1 | Cetuximab         | 0.187139 | 4.98E-07 | 84057 |
| MND1 | Cisplatin         | 0.027006 | 0.617431 | 84057 |
| MND1 | Crizotinib        | -0.01466 | 0.946299 | 84057 |
| MND1 | Cyclopamine       | -0.07942 | 0.424508 | 84057 |
| MND1 | Cytarabine        | -0.14094 | 0.000832 | 84057 |
| MND1 | DMOG              | -0.12457 | 0.001791 | 84057 |
| MND1 | Dabrafenib        | 0.057099 | 0.183513 | 84057 |
| MND1 | Dasatinib         | 0.056738 | 0.414297 | 84057 |
| MND1 | Docetaxel         | 0.173321 | 1.95E-06 | 84057 |
| MND1 | Doxorubicin       | -0.04623 | 0.463652 | 84057 |
| MND1 | EHT 1864          | 0.0201   | 0.806162 | 84057 |
| MND1 | EKB-569           | -0.14754 | 6.82E-05 | 84057 |
| MND1 | EX-527            | 0.049159 | 0.623207 | 84057 |
| MND1 | Elesclomol        | 0.022574 | 0.650774 | 84057 |
| MND1 | Embelin           | -0.02247 | 0.749308 | 84057 |



|      |                    |          |          |       |
|------|--------------------|----------|----------|-------|
| MND1 | Epothilone B       | 0.015554 | 0.798008 | 84057 |
| MND1 | Erlotinib          | 0.207672 | 0.001115 | 84057 |
| MND1 | Etoposide          | -0.14395 | 0.000404 | 84057 |
| MND1 | FH535              | 0.057642 | 0.217008 | 84057 |
| MND1 | FK866              | -0.27525 | 7.41E-16 | 84057 |
| MND1 | FMK                | -0.05923 | 0.350076 | 84057 |
| MND1 | FR-180204          | -0.05785 | 0.242417 | 84057 |
| MND1 | FTI-277            | 0.194632 | 3.31E-07 | 84057 |
| MND1 | Foretinib          | -0.16968 | 3.42E-06 | 84057 |
| MND1 | GDC0449            | -0.00367 | 0.982314 | 84057 |
| MND1 | GDC0941            | -0.05178 | 0.336234 | 84057 |
| MND1 | GNF-2              | -0.05122 | 0.834388 | 84057 |
| MND1 | GSK-650394         | -0.06471 | 0.314911 | 84057 |
| MND1 | GSK1070916         | -0.28152 | 1.72E-16 | 84057 |
| MND1 | GSK1904529A        | 0.134593 | 0.001119 | 84057 |
| MND1 | GSK2126458         | -0.20934 | 2.11E-09 | 84057 |
| MND1 | GSK269962A         | 0.018456 | 0.767172 | 84057 |
| MND1 | GSK429286A         | -0.15919 | 1.66E-05 | 84057 |
| MND1 | GSK690693          | -0.23707 | 5.64E-12 | 84057 |
| MND1 | GW 441756          | 0.025629 | 0.911881 | 84057 |
| MND1 | GW-2580            | 0.041756 | 0.903239 | 84057 |
| MND1 | GW843682X          | -0.20165 | 0.005854 | 84057 |
| MND1 | Gefitinib          | 0.190744 | 3.82E-07 | 84057 |
| MND1 | Gemcitabine        | -0.13512 | 0.001467 | 84057 |
| MND1 | Genentech Cpd 10   | -0.24632 | 6.46E-13 | 84057 |
| MND1 | HG-5-113-01        | -0.10925 | 0.085991 | 84057 |
| MND1 | HG-5-88-01         | 0.027436 | 0.882179 | 84057 |
| MND1 | HG-6-64-1          | -0.05647 | 0.227235 | 84057 |
| MND1 | I-BET-762          | -0.3389  | 5.75E-25 | 84057 |
| MND1 | IOX2               | 0.038349 | 0.52044  | 84057 |
| MND1 | IPA-3              | -0.20646 | 1.5E-08  | 84057 |
| MND1 | Imatinib           | -0.1008  | 0.356447 | 84057 |
| MND1 | Ispinesib Mesylate | -0.24354 | 1.25E-12 | 84057 |
| MND1 | JNJ-26854165       | 0.024494 | 0.671926 | 84057 |
| MND1 | JNK Inhibitor VIII | 0.130903 | 0.000987 | 84057 |
| MND1 | JNK-9L             | -0.04807 | 0.387579 | 84057 |
| MND1 | JQ1                | -0.07974 | 0.0506   | 84057 |
| MND1 | JQ12               | -0.07651 | 0.124661 | 84057 |
| MND1 | JW-7-24-1          | -0.26973 | 1.3E-15  | 84057 |
| MND1 | JW-7-52-1          | -0.07867 | 0.401011 | 84057 |
| MND1 | KIN001-055         | 0.027614 | 0.701807 | 84057 |
| MND1 | KIN001-102         | -0.29183 | 2.79E-18 | 84057 |
| MND1 | KIN001-135         | 0.147175 | 0.083304 | 84057 |
| MND1 | KIN001-236         | -0.20408 | 4.76E-09 | 84057 |
| MND1 | KIN001-244         | -0.24821 | 5.57E-13 | 84057 |
| MND1 | KIN001-260         | -0.212   | 8.13E-10 | 84057 |
| MND1 | KIN001-266         | -0.11196 | 0.008835 | 84057 |
| MND1 | KIN001-270         | -0.18054 | 6.99E-07 | 84057 |
| MND1 | KU-55933           | -0.10049 | 0.041376 | 84057 |
| MND1 | LAQ824             | -0.20577 | 1.75E-08 | 84057 |

|      |                    |          |          |       |
|------|--------------------|----------|----------|-------|
| MND1 | LFM-A13            | 0.108411 | 0.016441 | 84057 |
| MND1 | LY317615           | -0.13756 | 0.000413 | 84057 |
| MND1 | Lapatinib          | 0.265172 | 2.59E-06 | 84057 |
| MND1 | Lenalidomide       | -0.01532 | 0.879899 | 84057 |
| MND1 | Linifanib          | -0.037   | 0.495099 | 84057 |
| MND1 | Lisitinib          | 0.031667 | 0.650134 | 84057 |
| MND1 | MG-132             | 0.095181 | 0.23283  | 84057 |
| MND1 | MK-2206            | -0.13916 | 0.001684 | 84057 |
| MND1 | MLN4924            | 0.033477 | 0.581043 | 84057 |
| MND1 | MP470              | -0.10497 | 0.011628 | 84057 |
| MND1 | MPS-1-IN-1         | -0.16672 | 3.02E-06 | 84057 |
| MND1 | MS-275             | -0.18854 | 0.006118 | 84057 |
| MND1 | Masitinib          | -0.21501 | 7.88E-10 | 84057 |
| MND1 | Methotrexate       | -0.32471 | 4.67E-21 | 84057 |
| MND1 | Midostaurin        | 0.062703 | 0.150978 | 84057 |
| MND1 | Mitomycin C        | -0.10353 | 0.019717 | 84057 |
| MND1 | NG-25              | -0.29218 | 2.92E-18 | 84057 |
| MND1 | NPK76-II-72-1      | -0.36828 | 1.01E-29 | 84057 |
| MND1 | NSC-207895         | -0.14353 | 0.000267 | 84057 |
| MND1 | NSC-87877          | 0.097449 | 0.054511 | 84057 |
| MND1 | NU-7441            | -0.0518  | 0.44956  | 84057 |
| MND1 | Navitoclax         | -0.26642 | 3.36E-14 | 84057 |
| MND1 | Nilotinib          | -0.15771 | 0.000149 | 84057 |
| MND1 | Nutlin-3a (-)      | -0.00342 | 0.958124 | 84057 |
| MND1 | OSI-027            | -0.23978 | 2.76E-12 | 84057 |
| MND1 | OSI-930            | -0.15969 | 1.08E-05 | 84057 |
| MND1 | OSU-03012          | -0.11818 | 0.005885 | 84057 |
| MND1 | Obatoclax Mesylate | -0.10177 | 0.016265 | 84057 |
| MND1 | Olaparib           | 0.029347 | 0.529393 | 84057 |
| MND1 | PAC-1              | -0.19085 | 3.91E-07 | 84057 |
| MND1 | PD-0325901         | 0.188917 | 3.61E-07 | 84057 |
| MND1 | PD-0332991         | -0.07058 | 0.162347 | 84057 |
| MND1 | PD-173074          | 8.3E-05  | 0.999729 | 84057 |
| MND1 | PF-4708671         | 0.050565 | 0.579952 | 84057 |
| MND1 | PF-562271          | 0.035356 | 0.550583 | 84057 |
| MND1 | PFI-1              | -0.01749 | 0.75716  | 84057 |
| MND1 | PHA-665752         | 0.104376 | 0.40662  | 84057 |
| MND1 | PHA-793887         | -0.29921 | 2.16E-19 | 84057 |
| MND1 | PI-103             | -0.25532 | 7.68E-14 | 84057 |
| MND1 | PIK-93             | -0.32548 | 6.5E-23  | 84057 |
| MND1 | PLX4720            | 0.080985 | 0.041205 | 84057 |
| MND1 | Paclitaxel         | -0.03966 | 0.74713  | 84057 |
| MND1 | Parthenolide       | -0.10893 | 0.24144  | 84057 |
| MND1 | Pazopanib          | 0.072768 | 0.148243 | 84057 |
| MND1 | Phenformin         | -0.24373 | 2.67E-12 | 84057 |
| MND1 | Pyrimethamine      | -0.1385  | 0.161312 | 84057 |
| MND1 | QL-VIII-58         | -0.02961 | 0.740852 | 84057 |
| MND1 | QL-X-138           | -0.24976 | 3.68E-13 | 84057 |
| MND1 | QL-XI-92           | -0.25061 | 1.88E-13 | 84057 |
| MND1 | QL-XII-47          | -0.16598 | 6.31E-06 | 84057 |

|      |                     |          |          |       |
|------|---------------------|----------|----------|-------|
| MND1 | QL-XII-61           | -0.20526 | 0.000178 | 84057 |
| MND1 | QS11                | -0.12579 | 0.016611 | 84057 |
| MND1 | RDEA119             | 0.211268 | 6.29E-10 | 84057 |
| MND1 | RO-3306             | 0.167758 | 2.09E-05 | 84057 |
| MND1 | Rapamycin           | -0.09583 | 0.355597 | 84057 |
| MND1 | Roscovitine         | 0.044055 | 0.813333 | 84057 |
| MND1 | Ruxolitinib         | -0.08257 | 0.066049 | 84057 |
| MND1 | S-Trytyl-L-cysteine | -0.16763 | 0.016832 | 84057 |
| MND1 | SB 216763           | 0.126308 | 0.005483 | 84057 |
| MND1 | SB 505124           | 0.063783 | 0.34165  | 84057 |
| MND1 | SB52334             | -0.00518 | 0.937699 | 84057 |
| MND1 | SB590885            | 0.107281 | 0.01463  | 84057 |
| MND1 | SGC0946             | 0.106459 | 0.016553 | 84057 |
| MND1 | SL 0101-1           | 0.064696 | 0.374169 | 84057 |
| MND1 | SN-38               | -0.05554 | 0.201099 | 84057 |
| MND1 | SNX-2112            | -0.2654  | 6.77E-15 | 84057 |
| MND1 | STF-62247           | -0.12045 | 0.00163  | 84057 |
| MND1 | Salubrinal          | -0.13926 | 0.063455 | 84057 |
| MND1 | Saracatinib         | 0.030754 | 0.743343 | 84057 |
| MND1 | Shikonin            | -0.09796 | 0.034256 | 84057 |
| MND1 | Sorafenib           | -0.03049 | 0.814148 | 84057 |
| MND1 | Sunitinib           | -0.13696 | 0.037231 | 84057 |
| MND1 | T0901317            | -0.20268 | 2.54E-08 | 84057 |
| MND1 | TAE684              | 0.072329 | 0.496674 | 84057 |
| MND1 | TAK-715             | -0.23726 | 5.3E-12  | 84057 |
| MND1 | TG101348            | -0.27363 | 4.38E-16 | 84057 |
| MND1 | TGX221              | 0.188108 | 0.001439 | 84057 |
| MND1 | THZ-2-102-1         | -0.31238 | 1.83E-20 | 84057 |
| MND1 | THZ-2-49            | -0.25047 | 4.71E-13 | 84057 |
| MND1 | TL-1-85             | -0.29497 | 1.45E-18 | 84057 |
| MND1 | TL-2-105            | -0.23108 | 2.81E-11 | 84057 |
| MND1 | TPCA-1              | -0.32018 | 3.97E-22 | 84057 |
| MND1 | TW 37               | -0.09989 | 0.013776 | 84057 |
| MND1 | Talazoparib         | -0.01474 | 0.780429 | 84057 |
| MND1 | Tamoxifen           | 0.009931 | 0.951946 | 84057 |
| MND1 | Temozolomide        | 0.017388 | 0.843983 | 84057 |
| MND1 | Temsirolimus        | -0.09766 | 0.023558 | 84057 |
| MND1 | Thapsigargin        | -0.03917 | 0.556248 | 84057 |
| MND1 | Tipifarnib          | -0.05718 | 0.346942 | 84057 |
| MND1 | Tivozanib           | -0.07409 | 0.136731 | 84057 |
| MND1 | Trametinib          | 0.260412 | 4.52E-14 | 84057 |
| MND1 | Tubastatin A        | -0.24809 | 2.77E-13 | 84057 |
| MND1 | UNC0638             | -0.1988  | 3.47E-09 | 84057 |
| MND1 | UNC1215             | 0.190125 | 3.97E-05 | 84057 |
| MND1 | VNLG/124            | -0.1257  | 0.000925 | 84057 |
| MND1 | VX-11e              | -0.01854 | 0.74145  | 84057 |
| MND1 | VX-680              | -0.17116 | 0.023161 | 84057 |
| MND1 | VX-702              | 0.014145 | 0.960225 | 84057 |
| MND1 | Veliparib           | 0.068848 | 0.278934 | 84057 |
| MND1 | Vinblastine         | -0.14438 | 0.000252 | 84057 |

|       |                    |          |          |       |
|-------|--------------------|----------|----------|-------|
| MND1  | Vinorelbine        | -0.0952  | 0.046227 | 84057 |
| MND1  | Vorinostat         | -0.32976 | 1.08E-21 | 84057 |
| MND1  | WH-4-023           | 0.037614 | 0.662367 | 84057 |
| MND1  | WZ-1-84            | 0.136873 | 0.047751 | 84057 |
| MND1  | WZ3105             | -0.27973 | 8.84E-17 | 84057 |
| MND1  | XAV939             | 0.142663 | 0.000117 | 84057 |
| MND1  | XL-184             | -0.10708 | 0.009048 | 84057 |
| MND1  | XMD11-85h          | -0.02581 | 0.896902 | 84057 |
| MND1  | XMD13-2            | -0.2295  | 1.75E-11 | 84057 |
| MND1  | XMD14-99           | -0.11329 | 0.001981 | 84057 |
| MND1  | XMD15-27           | -0.06023 | 0.184651 | 84057 |
| MND1  | XMD8-85            | -0.06109 | 0.467661 | 84057 |
| MND1  | XMD8-92            | -0.03608 | 0.761967 | 84057 |
| MND1  | Y-39983            | -0.21634 | 5.48E-10 | 84057 |
| MND1  | YK 4-279           | -0.00069 | 0.992992 | 84057 |
| MND1  | YM155              | -0.11298 | 0.009507 | 84057 |
| MND1  | YM201636           | -0.25092 | 2.89E-13 | 84057 |
| MND1  | Z-LLN1e-CHO        | -0.00291 | 0.975703 | 84057 |
| MND1  | ZG-10              | -0.12843 | 0.0284   | 84057 |
| MND1  | ZM-447439          | -0.19643 | 7.84E-07 | 84057 |
| MND1  | ZSTK474            | -0.2471  | 5.25E-13 | 84057 |
| MND1  | Zibotentan         | 0.049352 | 0.813359 | 84057 |
| MND1  | piperlongumine     | 0.058323 | 0.17321  | 84057 |
| MND1  | rTRAIL             | 0.020391 | 0.81441  | 84057 |
| MND1  | selumetinib        | 0.214714 | 3.5E-10  | 84057 |
| NCAPG | (5Z)-7-Oxozeaenol  | 0.114837 | 0.002386 | 64151 |
| NCAPG | 17-AAG             | 0.277892 | 0        | 64151 |
| NCAPG | 5-Fluorouracil     | -0.07751 | 0.034295 | 64151 |
| NCAPG | 681640             | 0.009878 | 0.896733 | 64151 |
| NCAPG | A-443654           | -0.00473 | 0.986826 | 64151 |
| NCAPG | A-770041           | 0.054435 | 0.52134  | 64151 |
| NCAPG | AC220              | -0.05608 | 0.221041 | 64151 |
| NCAPG | AG-014699          | 0.013656 | 0.783302 | 64151 |
| NCAPG | AICAR              | -0.12146 | 0.001484 | 64151 |
| NCAPG | AKT inhibitor VIII | 0.125967 | 0.002187 | 64151 |
| NCAPG | AMG-706            | 0.02697  | 0.696992 | 64151 |
| NCAPG | AP-24534           | -0.0712  | 0.079221 | 64151 |
| NCAPG | AR-42              | -0.19673 | 1.26E-08 | 64151 |
| NCAPG | AS601245           | 0.105968 | 0.020041 | 64151 |
| NCAPG | AS605240           | -0.00231 | 0.966689 | 64151 |
| NCAPG | AT-7519            | -0.18369 | 1.02E-07 | 64151 |
| NCAPG | ATRA               | -0.09209 | 0.036104 | 64151 |
| NCAPG | AUY922             | 0.059143 | 0.233813 | 64151 |
| NCAPG | AZ628              | 0.164019 | 0.010542 | 64151 |
| NCAPG | AZD6482            | 0.025384 | 0.634647 | 64151 |
| NCAPG | AZD7762            | -0.15359 | 4.7E-05  | 64151 |
| NCAPG | AZD8055            | -0.14637 | 0.000106 | 64151 |
| NCAPG | Afatinib           | 0.212738 | 5.33E-10 | 64151 |
| NCAPG | Axitinib           | -0.07795 | 0.100442 | 64151 |
| NCAPG | BAY 61-3606        | -0.06567 | 0.107244 | 64151 |

|       |                   |          |          |       |
|-------|-------------------|----------|----------|-------|
| NCAPG | BEZ235            | 0.002615 | 0.966788 | 64151 |
| NCAPG | BHG712            | -0.12261 | 0.000538 | 64151 |
| NCAPG | BI-2536           | -0.08406 | 0.381034 | 64151 |
| NCAPG | BIRB 0796         | 0.051197 | 0.317381 | 64151 |
| NCAPG | BIX02189          | -0.16118 | 4.36E-06 | 64151 |
| NCAPG | BMS-509744        | 0.029963 | 0.773349 | 64151 |
| NCAPG | BMS-536924        | -0.00553 | 0.954909 | 64151 |
| NCAPG | BMS-708163        | 0.114583 | 0.002904 | 64151 |
| NCAPG | BMS-754807        | 0.021591 | 0.728906 | 64151 |
| NCAPG | BMS345541         | -0.16577 | 1.86E-06 | 64151 |
| NCAPG | BX-795            | -0.11689 | 0.004102 | 64151 |
| NCAPG | BX-912            | -0.2422  | 8.11E-13 | 64151 |
| NCAPG | Belinostat        | -0.17173 | 1.4E-06  | 64151 |
| NCAPG | Bexarotene        | 0.032874 | 0.679727 | 64151 |
| NCAPG | Bicalutamide      | 0.035044 | 0.453618 | 64151 |
| NCAPG | Bleomycin         | 0.103602 | 0.026543 | 64151 |
| NCAPG | Bleomycin (50 uM) | 0.152724 | 1.43E-05 | 64151 |
| NCAPG | Bortezomib        | 0.105547 | 0.139111 | 64151 |
| NCAPG | Bosutinib         | 0.002285 | 0.975634 | 64151 |
| NCAPG | Bryostatins 1     | 0.084289 | 0.073445 | 64151 |
| NCAPG | CAL-101           | -0.11606 | 0.001421 | 64151 |
| NCAPG | CAY10603          | -0.20356 | 3.37E-09 | 64151 |
| NCAPG | CCT007093         | 0.12173  | 0.002347 | 64151 |
| NCAPG | CCT018159         | 0.054112 | 0.277079 | 64151 |
| NCAPG | CEP-701           | -0.12115 | 0.001665 | 64151 |
| NCAPG | CGP-082996        | 0.018583 | 0.881631 | 64151 |
| NCAPG | CGP-60474         | 0.038149 | 0.691171 | 64151 |
| NCAPG | CH5424802         | -0.07144 | 0.162282 | 64151 |
| NCAPG | CHIR-99021        | 0.048027 | 0.220984 | 64151 |
| NCAPG | CI-1040           | 0.15828  | 4.54E-05 | 64151 |
| NCAPG | CMK               | 0.010025 | 0.949537 | 64151 |
| NCAPG | CP466722          | -0.20146 | 4.35E-09 | 64151 |
| NCAPG | CP724714          | 0.123429 | 0.003203 | 64151 |
| NCAPG | CUDC-101          | -0.17692 | 5.21E-07 | 64151 |
| NCAPG | CX-5461           | -0.17759 | 3.94E-07 | 64151 |
| NCAPG | Camptothecin      | -0.11892 | 0.002819 | 64151 |
| NCAPG | Cetuximab         | 0.152078 | 5.49E-05 | 64151 |
| NCAPG | Cisplatin         | -0.02533 | 0.644417 | 64151 |
| NCAPG | Crizotinib        | -0.05405 | 0.718938 | 64151 |
| NCAPG | Cyclophosphamide  | -0.0105  | 0.942041 | 64151 |
| NCAPG | Cytarabine        | -0.03131 | 0.567556 | 64151 |
| NCAPG | DMOG              | -0.08707 | 0.037546 | 64151 |
| NCAPG | Dabrafenib        | 0.07688  | 0.062734 | 64151 |
| NCAPG | Dasatinib         | 0.110073 | 0.086682 | 64151 |
| NCAPG | Docetaxel         | 0.171007 | 2.7E-06  | 64151 |
| NCAPG | Doxorubicin       | 0.002237 | 0.97957  | 64151 |
| NCAPG | EHT 1864          | 0.035616 | 0.610665 | 64151 |
| NCAPG | EKB-569           | -0.01916 | 0.677307 | 64151 |
| NCAPG | EX-527            | -0.01635 | 0.900101 | 64151 |
| NCAPG | Elesclomol        | -0.01451 | 0.780341 | 64151 |

|       |                    |          |          |       |
|-------|--------------------|----------|----------|-------|
| NCAPG | Embelin            | 0.047028 | 0.417482 | 64151 |
| NCAPG | Epothilone B       | 0.080857 | 0.087306 | 64151 |
| NCAPG | Erlotinib          | 0.237664 | 0.000151 | 64151 |
| NCAPG | Etoposide          | -0.09997 | 0.018585 | 64151 |
| NCAPG | FH535              | 0.149444 | 0.000247 | 64151 |
| NCAPG | FK866              | -0.22442 | 7.92E-11 | 64151 |
| NCAPG | FMK                | -0.0046  | 0.95988  | 64151 |
| NCAPG | FR-180204          | -0.0204  | 0.738966 | 64151 |
| NCAPG | FTI-277            | 0.165301 | 1.83E-05 | 64151 |
| NCAPG | Foretinib          | -0.1466  | 7.15E-05 | 64151 |
| NCAPG | GDC0449            | -0.02291 | 0.846826 | 64151 |
| NCAPG | GDC0941            | -0.05119 | 0.343576 | 64151 |
| NCAPG | GNF-2              | -0.03172 | 0.909896 | 64151 |
| NCAPG | GSK-650394         | 0.017838 | 0.845765 | 64151 |
| NCAPG | GSK1070916         | -0.23172 | 2.07E-11 | 64151 |
| NCAPG | GSK1904529A        | 0.068    | 0.125268 | 64151 |
| NCAPG | GSK2126458         | -0.12128 | 0.000812 | 64151 |
| NCAPG | GSK269962A         | 0.00191  | 0.978763 | 64151 |
| NCAPG | GSK429286A         | -0.13977 | 0.000179 | 64151 |
| NCAPG | GSK690693          | -0.19135 | 3.99E-08 | 64151 |
| NCAPG | GW 441756          | 0.001231 | 0.995843 | 64151 |
| NCAPG | GW-2580            | -0.00246 | 0.99615  | 64151 |
| NCAPG | GW843682X          | -0.10343 | 0.193691 | 64151 |
| NCAPG | Gefitinib          | 0.191488 | 3.42E-07 | 64151 |
| NCAPG | Gemcitabine        | -0.05587 | 0.247126 | 64151 |
| NCAPG | Genentech Cpd 10   | -0.19379 | 2.4E-08  | 64151 |
| NCAPG | HG-5-113-01        | -0.08034 | 0.231777 | 64151 |
| NCAPG | HG-5-88-01         | -0.0524  | 0.72217  | 64151 |
| NCAPG | HG-6-64-1          | 0.020485 | 0.713265 | 64151 |
| NCAPG | I-BET-762          | -0.21802 | 1.2E-10  | 64151 |
| NCAPG | IOX2               | 0.021203 | 0.753618 | 64151 |
| NCAPG | IPA-3              | -0.11677 | 0.002035 | 64151 |
| NCAPG | Imatinib           | -0.04284 | 0.804496 | 64151 |
| NCAPG | Ispinesib Mesylate | -0.13481 | 0.000143 | 64151 |
| NCAPG | JNJ-26854165       | 0.032414 | 0.556394 | 64151 |
| NCAPG | JNK Inhibitor VIII | 0.071251 | 0.089176 | 64151 |
| NCAPG | JNK-9L             | 0.055016 | 0.305367 | 64151 |
| NCAPG | JQ1                | -0.01118 | 0.830502 | 64151 |
| NCAPG | JQ12               | -0.01073 | 0.876452 | 64151 |
| NCAPG | JW-7-24-1          | -0.22101 | 9.52E-11 | 64151 |
| NCAPG | JW-7-52-1          | 0.020548 | 0.871893 | 64151 |
| NCAPG | KIN001-055         | 0.059559 | 0.294244 | 64151 |
| NCAPG | KIN001-102         | -0.16924 | 9.55E-07 | 64151 |
| NCAPG | KIN001-135         | 0.105081 | 0.24348  | 64151 |
| NCAPG | KIN001-236         | -0.1306  | 0.000264 | 64151 |
| NCAPG | KIN001-244         | -0.16655 | 2.27E-06 | 64151 |
| NCAPG | KIN001-260         | -0.15491 | 1.02E-05 | 64151 |
| NCAPG | KIN001-266         | -0.07404 | 0.099969 | 64151 |
| NCAPG | KIN001-270         | -0.16178 | 9.98E-06 | 64151 |
| NCAPG | KU-55933           | -0.07753 | 0.137716 | 64151 |

|       |                    |          |          |       |
|-------|--------------------|----------|----------|-------|
| NCAPG | LAQ824             | -0.09596 | 0.012605 | 64151 |
| NCAPG | LFM-A13            | 0.057673 | 0.241036 | 64151 |
| NCAPG | LY317615           | -0.03003 | 0.522713 | 64151 |
| NCAPG | Lapatinib          | 0.269999 | 1.61E-06 | 64151 |
| NCAPG | Lenalidomide       | -0.04188 | 0.577556 | 64151 |
| NCAPG | Linifanib          | -0.00762 | 0.912847 | 64151 |
| NCAPG | Lisitinib          | 0.000888 | 0.992001 | 64151 |
| NCAPG | MG-132             | 0.092492 | 0.248991 | 64151 |
| NCAPG | MK-2206            | -0.09099 | 0.052722 | 64151 |
| NCAPG | MLN4924            | 0.10696  | 0.035388 | 64151 |
| NCAPG | MP470              | -0.09061 | 0.02987  | 64151 |
| NCAPG | MPS-1-IN-1         | -0.14684 | 4.44E-05 | 64151 |
| NCAPG | MS-275             | -0.13973 | 0.049046 | 64151 |
| NCAPG | Masitinib          | -0.14431 | 5.73E-05 | 64151 |
| NCAPG | Methotrexate       | -0.22558 | 1.85E-10 | 64151 |
| NCAPG | Midostaurin        | 0.0599   | 0.172099 | 64151 |
| NCAPG | Mitomycin C        | -0.01275 | 0.838158 | 64151 |
| NCAPG | NG-25              | -0.17032 | 9.09E-07 | 64151 |
| NCAPG | NPK76-II-72-1      | -0.29014 | 2.62E-18 | 64151 |
| NCAPG | NSC-207895         | -0.18924 | 1.34E-06 | 64151 |
| NCAPG | NSC-87877          | 0.086123 | 0.093588 | 64151 |
| NCAPG | NU-7441            | -0.03192 | 0.685882 | 64151 |
| NCAPG | Navitoclax         | -0.29375 | 3.7E-17  | 64151 |
| NCAPG | Nilotinib          | -0.08421 | 0.067005 | 64151 |
| NCAPG | Nutlin-3a (-)      | 0.039418 | 0.43056  | 64151 |
| NCAPG | OSI-027            | -0.19777 | 1.17E-08 | 64151 |
| NCAPG | OSI-930            | -0.05546 | 0.158653 | 64151 |
| NCAPG | OSU-03012          | -0.00355 | 0.959665 | 64151 |
| NCAPG | Obatoclax Mesylate | 0.009531 | 0.87289  | 64151 |
| NCAPG | Olaparib           | -0.02073 | 0.671094 | 64151 |
| NCAPG | PAC-1              | -0.11796 | 0.002651 | 64151 |
| NCAPG | PD-0325901         | 0.235602 | 1.31E-10 | 64151 |
| NCAPG | PD-0332991         | 0.020315 | 0.75839  | 64151 |
| NCAPG | PD-173074          | -0.01767 | 0.925057 | 64151 |
| NCAPG | PF-4708671         | 0.065946 | 0.45116  | 64151 |
| NCAPG | PF-562271          | 0.042474 | 0.452547 | 64151 |
| NCAPG | PFI-1              | 0.009224 | 0.880373 | 64151 |
| NCAPG | PHA-665752         | 0.053762 | 0.715304 | 64151 |
| NCAPG | PHA-793887         | -0.19433 | 1.23E-08 | 64151 |
| NCAPG | PI-103             | -0.20804 | 1.76E-09 | 64151 |
| NCAPG | PIK-93             | -0.23204 | 7.28E-12 | 64151 |
| NCAPG | PLX4720            | 0.08112  | 0.040843 | 64151 |
| NCAPG | Paclitaxel         | 0.033284 | 0.795607 | 64151 |
| NCAPG | Parthenolide       | -0.01136 | 0.932783 | 64151 |
| NCAPG | Pazopanib          | 0.019281 | 0.762661 | 64151 |
| NCAPG | Phenformin         | -0.09975 | 0.006383 | 64151 |
| NCAPG | Pyrimethamine      | -0.03494 | 0.785033 | 64151 |
| NCAPG | QL-VIII-58         | 0.017728 | 0.85705  | 64151 |
| NCAPG | QL-X-138           | -0.22755 | 4.55E-11 | 64151 |
| NCAPG | QL-XI-92           | -0.20325 | 3.86E-09 | 64151 |

|       |                     |          |          |       |
|-------|---------------------|----------|----------|-------|
| NCAPG | QL-XII-47           | -0.11751 | 0.001831 | 64151 |
| NCAPG | QL-XII-61           | -0.15019 | 0.008737 | 64151 |
| NCAPG | QS11                | -0.05475 | 0.358568 | 64151 |
| NCAPG | RDEA119             | 0.25661  | 2.94E-14 | 64151 |
| NCAPG | RO-3306             | 0.117994 | 0.003368 | 64151 |
| NCAPG | Rapamycin           | -0.00232 | 0.990215 | 64151 |
| NCAPG | Roscovitine         | 0.116407 | 0.381948 | 64151 |
| NCAPG | Ruxolitinib         | -0.057   | 0.240866 | 64151 |
| NCAPG | S-Trityl-L-cysteine | -0.02366 | 0.810121 | 64151 |
| NCAPG | SB 216763           | 0.08636  | 0.067624 | 64151 |
| NCAPG | SB 505124           | 0.031549 | 0.696286 | 64151 |
| NCAPG | SB52334             | -0.08726 | 0.037244 | 64151 |
| NCAPG | SB590885            | 0.136316 | 0.001117 | 64151 |
| NCAPG | SGC0946             | 0.061891 | 0.210961 | 64151 |
| NCAPG | SL 0101-1           | 0.051295 | 0.491186 | 64151 |
| NCAPG | SN-38               | -0.03265 | 0.49121  | 64151 |
| NCAPG | SNX-2112            | -0.14248 | 5.44E-05 | 64151 |
| NCAPG | STF-62247           | -0.08929 | 0.022179 | 64151 |
| NCAPG | Salubrinal          | -0.00673 | 0.95414  | 64151 |
| NCAPG | Saracatinib         | 0.065103 | 0.435668 | 64151 |
| NCAPG | Shikonin            | -0.06074 | 0.228648 | 64151 |
| NCAPG | Sorafenib           | 0.059119 | 0.591235 | 64151 |
| NCAPG | Sunitinib           | -0.01474 | 0.879258 | 64151 |
| NCAPG | T0901317            | -0.12779 | 0.000749 | 64151 |
| NCAPG | TAE684              | 0.031384 | 0.816499 | 64151 |
| NCAPG | TAK-715             | -0.11154 | 0.00177  | 64151 |
| NCAPG | TG101348            | -0.20794 | 1.24E-09 | 64151 |
| NCAPG | TGX221              | 0.151138 | 0.012527 | 64151 |
| NCAPG | THZ-2-102-1         | -0.20826 | 1.79E-09 | 64151 |
| NCAPG | THZ-2-49            | -0.1017  | 0.005137 | 64151 |
| NCAPG | TL-1-85             | -0.16581 | 1.91E-06 | 64151 |
| NCAPG | TL-2-105            | -0.16445 | 3.49E-06 | 64151 |
| NCAPG | TPCA-1              | -0.21782 | 1.47E-10 | 64151 |
| NCAPG | TW 37               | -0.05838 | 0.192459 | 64151 |
| NCAPG | Talazoparib         | -0.0174  | 0.738054 | 64151 |
| NCAPG | Tamoxifen           | 0.00378  | 0.983058 | 64151 |
| NCAPG | Temozolomide        | -0.01189 | 0.901057 | 64151 |
| NCAPG | Temsirolimus        | -0.05861 | 0.219652 | 64151 |
| NCAPG | Thapsigargin        | 0.026261 | 0.724965 | 64151 |
| NCAPG | Tipifarnib          | 0.048206 | 0.450715 | 64151 |
| NCAPG | Tivozanib           | -0.07798 | 0.112254 | 64151 |
| NCAPG | Trametinib          | 0.295417 | 0        | 64151 |
| NCAPG | Tubastatin A        | -0.20353 | 3.02E-09 | 64151 |
| NCAPG | UNC0638             | -0.19843 | 3.73E-09 | 64151 |
| NCAPG | UNC1215             | 0.10072  | 0.024489 | 64151 |
| NCAPG | VNLG/124            | -0.07491 | 0.060944 | 64151 |
| NCAPG | VX-11e              | 0.081021 | 0.063303 | 64151 |
| NCAPG | VX-680              | -0.09594 | 0.264193 | 64151 |
| NCAPG | VX-702              | -0.05155 | 0.774175 | 64151 |
| NCAPG | Veliparib           | 0.033157 | 0.643646 | 64151 |



|       |                    |          |          |       |
|-------|--------------------|----------|----------|-------|
| NCAPG | Vinblastine        | -0.06511 | 0.13168  | 64151 |
| NCAPG | Vinorelbine        | -0.0328  | 0.577849 | 64151 |
| NCAPG | Vorinostat         | -0.24892 | 1.59E-12 | 64151 |
| NCAPG | WH-4-023           | 0.093009 | 0.208028 | 64151 |
| NCAPG | WZ-1-84            | 0.119295 | 0.0931   | 64151 |
| NCAPG | WZ3105             | -0.17532 | 3.74E-07 | 64151 |
| NCAPG | XAV939             | 0.088042 | 0.02143  | 64151 |
| NCAPG | XL-184             | -0.06014 | 0.183141 | 64151 |
| NCAPG | XMD11-85h          | -0.01445 | 0.949867 | 64151 |
| NCAPG | XMD13-2            | -0.19452 | 1.63E-08 | 64151 |
| NCAPG | XMD14-99           | -0.1073  | 0.003519 | 64151 |
| NCAPG | XMD15-27           | -0.08816 | 0.039562 | 64151 |
| NCAPG | XMD8-85            | 0.05845  | 0.491301 | 64151 |
| NCAPG | XMD8-92            | -0.0461  | 0.679106 | 64151 |
| NCAPG | Y-39983            | -0.18535 | 1.4E-07  | 64151 |
| NCAPG | YK 4-279           | 0.062736 | 0.216777 | 64151 |
| NCAPG | YM155              | -0.09958 | 0.02506  | 64151 |
| NCAPG | YM201636           | -0.19172 | 3.78E-08 | 64151 |
| NCAPG | Z-LLN1e-CHO        | 0.071614 | 0.33278  | 64151 |
| NCAPG | ZG-10              | -0.14264 | 0.013384 | 64151 |
| NCAPG | ZM-447439          | -0.11625 | 0.005038 | 64151 |
| NCAPG | ZSTK474            | -0.16523 | 2.39E-06 | 64151 |
| NCAPG | Zibotentan         | -0.02157 | 0.949888 | 64151 |
| NCAPG | piperlongumine     | 0.032377 | 0.488452 | 64151 |
| NCAPG | rTRAIL             | 0.078062 | 0.212735 | 64151 |
| NCAPG | selumetinib        | 0.244376 | 6.13E-13 | 64151 |
| NDC80 | (5Z)-7-Oxozeaenol  | 0.178608 | 8.41E-07 | 10403 |
| NDC80 | 17-AAG             | 0.14247  | 9.03E-05 | 10403 |
| NDC80 | 5-Fluorouracil     | -0.01422 | 0.724751 | 10403 |
| NDC80 | 681640             | -0.00708 | 0.924328 | 10403 |
| NDC80 | A-443654           | -0.06056 | 0.714829 | 10403 |
| NDC80 | A-770041           | -0.05884 | 0.479206 | 10403 |
| NDC80 | AC220              | -0.01319 | 0.827179 | 10403 |
| NDC80 | AG-014699          | 0.037002 | 0.407424 | 10403 |
| NDC80 | AICAR              | -0.10045 | 0.009448 | 10403 |
| NDC80 | AKT inhibitor VIII | 0.067801 | 0.122535 | 10403 |
| NDC80 | AMG-706            | 0.036227 | 0.56998  | 10403 |
| NDC80 | AP-24534           | -0.07548 | 0.061015 | 10403 |
| NDC80 | AR-42              | -0.10002 | 0.005052 | 10403 |
| NDC80 | AS601245           | 0.063141 | 0.215874 | 10403 |
| NDC80 | AS605240           | 0.02366  | 0.623914 | 10403 |
| NDC80 | AT-7519            | -0.17926 | 2.13E-07 | 10403 |
| NDC80 | ATRA               | -0.02764 | 0.609999 | 10403 |
| NDC80 | AUY922             | -0.01064 | 0.876927 | 10403 |
| NDC80 | AZ628              | 0.185924 | 0.003103 | 10403 |
| NDC80 | AZD6482            | 0.035726 | 0.468362 | 10403 |
| NDC80 | AZD7762            | -0.15837 | 2.59E-05 | 10403 |
| NDC80 | AZD8055            | -0.08699 | 0.025715 | 10403 |
| NDC80 | Afatinib           | 0.091677 | 0.011784 | 10403 |
| NDC80 | Axitinib           | -0.05635 | 0.265845 | 10403 |

|       |                   |          |          |       |
|-------|-------------------|----------|----------|-------|
| NDC80 | BAY 61-3606       | -0.02153 | 0.635307 | 10403 |
| NDC80 | BEZ235            | -0.0224  | 0.685577 | 10403 |
| NDC80 | BHG712            | -0.05089 | 0.173251 | 10403 |
| NDC80 | BI-2536           | -0.13662 | 0.118532 | 10403 |
| NDC80 | BIRB 0796         | 0.012207 | 0.841308 | 10403 |
| NDC80 | BIX02189          | -0.10086 | 0.005142 | 10403 |
| NDC80 | BMS-509744        | 0.058789 | 0.53177  | 10403 |
| NDC80 | BMS-536924        | 0.037394 | 0.597262 | 10403 |
| NDC80 | BMS-708163        | 0.081389 | 0.038155 | 10403 |
| NDC80 | BMS-754807        | 0.078458 | 0.114814 | 10403 |
| NDC80 | BMS345541         | -0.14105 | 5.67E-05 | 10403 |
| NDC80 | BX-795            | -0.09524 | 0.022985 | 10403 |
| NDC80 | BX-912            | -0.15753 | 5.29E-06 | 10403 |
| NDC80 | Belinostat        | -0.09869 | 0.007172 | 10403 |
| NDC80 | Bexarotene        | 0.025815 | 0.761365 | 10403 |
| NDC80 | Bicalutamide      | 0.01793  | 0.725576 | 10403 |
| NDC80 | Bleomycin         | 0.034261 | 0.563543 | 10403 |
| NDC80 | Bleomycin (50 uM) | 0.044042 | 0.241472 | 10403 |
| NDC80 | Bortezomib        | 0.036325 | 0.688813 | 10403 |
| NDC80 | Bosutinib         | -0.06198 | 0.211034 | 10403 |
| NDC80 | Bryostatins 1     | 0.083881 | 0.075017 | 10403 |
| NDC80 | CAL-101           | -0.08131 | 0.029156 | 10403 |
| NDC80 | CAY10603          | -0.11253 | 0.001494 | 10403 |
| NDC80 | CCT007093         | 0.079016 | 0.057122 | 10403 |
| NDC80 | CCT018159         | -0.02234 | 0.701188 | 10403 |
| NDC80 | CEP-701           | -0.05465 | 0.186611 | 10403 |
| NDC80 | CGP-082996        | -0.06428 | 0.497831 | 10403 |
| NDC80 | CGP-60474         | -0.03541 | 0.715098 | 10403 |
| NDC80 | CH5424802         | -0.00987 | 0.902251 | 10403 |
| NDC80 | CHIR-99021        | 0.046356 | 0.239293 | 10403 |
| NDC80 | CI-1040           | 0.156547 | 5.56E-05 | 10403 |
| NDC80 | CMK               | -0.00814 | 0.95804  | 10403 |
| NDC80 | CP466722          | -0.12889 | 0.000243 | 10403 |
| NDC80 | CP724714          | 0.083979 | 0.069813 | 10403 |
| NDC80 | CUDC-101          | -0.12138 | 0.000743 | 10403 |
| NDC80 | CX-5461           | -0.0832  | 0.022928 | 10403 |
| NDC80 | Camptothecin      | -0.09711 | 0.017276 | 10403 |
| NDC80 | Cetuximab         | 0.065179 | 0.108939 | 10403 |
| NDC80 | Cisplatin         | -0.039   | 0.446901 | 10403 |
| NDC80 | Crizotinib        | -0.01494 | 0.945293 | 10403 |
| NDC80 | Cyclopamine       | -0.045   | 0.699296 | 10403 |
| NDC80 | Cytarabine        | -0.04974 | 0.324047 | 10403 |
| NDC80 | DMOG              | -0.09905 | 0.015855 | 10403 |
| NDC80 | Dabrafenib        | 0.168049 | 8.01E-06 | 10403 |
| NDC80 | Dasatinib         | 0.013938 | 0.859871 | 10403 |
| NDC80 | Docetaxel         | 0.001308 | 0.976037 | 10403 |
| NDC80 | Doxorubicin       | -0.02778 | 0.695811 | 10403 |
| NDC80 | EHT 1864          | 0.084262 | 0.124053 | 10403 |
| NDC80 | EKB-569           | -0.0552  | 0.172565 | 10403 |
| NDC80 | EX-527            | 0.003877 | 0.979279 | 10403 |

|       |                    |          |          |       |
|-------|--------------------|----------|----------|-------|
| NDC80 | Elesclomol         | -0.06977 | 0.107044 | 10403 |
| NDC80 | Embelin            | 0.01302  | 0.867845 | 10403 |
| NDC80 | Epothilone B       | -0.00986 | 0.877623 | 10403 |
| NDC80 | Erlotinib          | 0.147836 | 0.028025 | 10403 |
| NDC80 | Etoposide          | -0.11445 | 0.006028 | 10403 |
| NDC80 | FH535              | 0.093015 | 0.030839 | 10403 |
| NDC80 | FK866              | -0.16852 | 1.5E-06  | 10403 |
| NDC80 | FMK                | 0.032715 | 0.653417 | 10403 |
| NDC80 | FR-180204          | 0.013099 | 0.842984 | 10403 |
| NDC80 | FTI-277            | 0.145087 | 0.000188 | 10403 |
| NDC80 | Foretinib          | -0.08435 | 0.03128  | 10403 |
| NDC80 | GDC0449            | 0.00525  | 0.972896 | 10403 |
| NDC80 | GDC0941            | -0.03994 | 0.488228 | 10403 |
| NDC80 | GNF-2              | -0.05179 | 0.831145 | 10403 |
| NDC80 | GSK-650394         | -0.01757 | 0.849882 | 10403 |
| NDC80 | GSK1070916         | -0.14807 | 3.04E-05 | 10403 |
| NDC80 | GSK1904529A        | 0.059778 | 0.183675 | 10403 |
| NDC80 | GSK2126458         | -0.07302 | 0.05147  | 10403 |
| NDC80 | GSK269962A         | 0.028886 | 0.615357 | 10403 |
| NDC80 | GSK429286A         | -0.08754 | 0.02579  | 10403 |
| NDC80 | GSK690693          | -0.14361 | 5.13E-05 | 10403 |
| NDC80 | GW 441756          | -0.01548 | 0.961858 | 10403 |
| NDC80 | GW-2580            | 0.033075 | 0.938104 | 10403 |
| NDC80 | GW843682X          | -0.14579 | 0.048269 | 10403 |
| NDC80 | Gefitinib          | 0.07924  | 0.051228 | 10403 |
| NDC80 | Gemcitabine        | -0.08785 | 0.049928 | 10403 |
| NDC80 | Genentech Cpd 10   | -0.1323  | 0.000197 | 10403 |
| NDC80 | HG-5-113-01        | -0.02657 | 0.751528 | 10403 |
| NDC80 | HG-5-88-01         | 0.046364 | 0.764129 | 10403 |
| NDC80 | HG-6-64-1          | -0.01491 | 0.799816 | 10403 |
| NDC80 | I-BET-762          | -0.13663 | 7.58E-05 | 10403 |
| NDC80 | IOX2               | -0.01626 | 0.818766 | 10403 |
| NDC80 | IPA-3              | -0.09361 | 0.014932 | 10403 |
| NDC80 | Imatinib           | -0.07692 | 0.556712 | 10403 |
| NDC80 | Ispinesib Mesylate | -0.10205 | 0.004674 | 10403 |
| NDC80 | JNJ-26854165       | 0.014517 | 0.817605 | 10403 |
| NDC80 | JNK Inhibitor VIII | 0.011382 | 0.818099 | 10403 |
| NDC80 | JNK-9L             | -0.00566 | 0.944609 | 10403 |
| NDC80 | JQ1                | 0.013684 | 0.789089 | 10403 |
| NDC80 | JQ12               | 0.025219 | 0.677259 | 10403 |
| NDC80 | JW-7-24-1          | -0.12205 | 0.000525 | 10403 |
| NDC80 | JW-7-52-1          | -0.03999 | 0.720051 | 10403 |
| NDC80 | KIN001-055         | 0.009813 | 0.914551 | 10403 |
| NDC80 | KIN001-102         | -0.12542 | 0.000337 | 10403 |
| NDC80 | KIN001-135         | 0.098385 | 0.285196 | 10403 |
| NDC80 | KIN001-236         | -0.06407 | 0.087477 | 10403 |
| NDC80 | KIN001-244         | -0.08655 | 0.017901 | 10403 |
| NDC80 | KIN001-260         | -0.06975 | 0.056695 | 10403 |
| NDC80 | KIN001-266         | -0.01505 | 0.78739  | 10403 |
| NDC80 | KIN001-270         | -0.102   | 0.006878 | 10403 |

|       |                    |          |          |       |
|-------|--------------------|----------|----------|-------|
| NDC80 | KU-55933           | -0.0731  | 0.167749 | 10403 |
| NDC80 | LAQ824             | -0.06953 | 0.078758 | 10403 |
| NDC80 | LFM-A13            | 0.073343 | 0.122394 | 10403 |
| NDC80 | LY317615           | -0.04505 | 0.312809 | 10403 |
| NDC80 | Lapatinib          | 0.173106 | 0.003492 | 10403 |
| NDC80 | Lenalidomide       | -0.03793 | 0.62865  | 10403 |
| NDC80 | Linifanib          | 0.015002 | 0.81562  | 10403 |
| NDC80 | Lisitinib          | 0.068905 | 0.221732 | 10403 |
| NDC80 | MG-132             | 0.053012 | 0.569659 | 10403 |
| NDC80 | MK-2206            | -0.0922  | 0.049314 | 10403 |
| NDC80 | MLN4924            | 0.030614 | 0.618631 | 10403 |
| NDC80 | MP470              | -0.00386 | 0.943191 | 10403 |
| NDC80 | MPS-1-IN-1         | -0.01778 | 0.67408  | 10403 |
| NDC80 | MS-275             | -0.13875 | 0.050882 | 10403 |
| NDC80 | Masitinib          | -0.07346 | 0.050209 | 10403 |
| NDC80 | Methotrexate       | -0.13678 | 0.000164 | 10403 |
| NDC80 | Midostaurin        | 0.023371 | 0.638865 | 10403 |
| NDC80 | Mitomycin C        | -0.03449 | 0.528174 | 10403 |
| NDC80 | NG-25              | -0.10837 | 0.002271 | 10403 |
| NDC80 | NPK76-II-72-1      | -0.19569 | 8.81E-09 | 10403 |
| NDC80 | NSC-207895         | -0.104   | 0.010148 | 10403 |
| NDC80 | NSC-87877          | 0.089899 | 0.078334 | 10403 |
| NDC80 | NU-7441            | -0.0254  | 0.7629   | 10403 |
| NDC80 | Navitoclax         | -0.17033 | 2.25E-06 | 10403 |
| NDC80 | Nilotinib          | -0.07828 | 0.093001 | 10403 |
| NDC80 | Nutlin-3a (-)      | 0.148209 | 0.000278 | 10403 |
| NDC80 | OSI-027            | -0.09224 | 0.010347 | 10403 |
| NDC80 | OSI-930            | -0.03141 | 0.449564 | 10403 |
| NDC80 | OSU-03012          | -0.03997 | 0.435386 | 10403 |
| NDC80 | Obatoclax Mesylate | -0.00824 | 0.891436 | 10403 |
| NDC80 | Olaparib           | -0.00131 | 0.980895 | 10403 |
| NDC80 | PAC-1              | -0.0651  | 0.117995 | 10403 |
| NDC80 | PD-0325901         | 0.204284 | 3.26E-08 | 10403 |
| NDC80 | PD-0332991         | 0.05518  | 0.302271 | 10403 |
| NDC80 | PD-173074          | -0.02846 | 0.867408 | 10403 |
| NDC80 | PF-4708671         | 0.080412 | 0.342017 | 10403 |
| NDC80 | PF-562271          | 0.043515 | 0.439687 | 10403 |
| NDC80 | PFI-1              | 0.014249 | 0.80523  | 10403 |
| NDC80 | PHA-665752         | 0.073925 | 0.593248 | 10403 |
| NDC80 | PHA-793887         | -0.14557 | 2.54E-05 | 10403 |
| NDC80 | PI-103             | -0.11513 | 0.001216 | 10403 |
| NDC80 | PIK-93             | -0.15526 | 7.02E-06 | 10403 |
| NDC80 | PLX4720            | 0.164072 | 5.95E-06 | 10403 |
| NDC80 | Paclitaxel         | -0.06666 | 0.533574 | 10403 |
| NDC80 | Parthenolide       | -0.00849 | 0.951915 | 10403 |
| NDC80 | Pazopanib          | 0.043497 | 0.435412 | 10403 |
| NDC80 | Phenformin         | -0.07311 | 0.049609 | 10403 |
| NDC80 | Pyrimethamine      | -0.05388 | 0.647799 | 10403 |
| NDC80 | QL-VIII-58         | -0.03795 | 0.652042 | 10403 |
| NDC80 | QL-X-138           | -0.13295 | 0.000191 | 10403 |

|       |                     |          |          |       |
|-------|---------------------|----------|----------|-------|
| NDC80 | QL-XI-92            | -0.13454 | 0.000137 | 10403 |
| NDC80 | QL-XII-47           | -0.08172 | 0.035258 | 10403 |
| NDC80 | QL-XII-61           | -0.08508 | 0.175865 | 10403 |
| NDC80 | QS11                | -0.04568 | 0.463909 | 10403 |
| NDC80 | RDEA119             | 0.249252 | 1.77E-13 | 10403 |
| NDC80 | RO-3306             | 0.026944 | 0.550287 | 10403 |
| NDC80 | Rapamycin           | -0.10052 | 0.322688 | 10403 |
| NDC80 | Roscovitine         | 0.069301 | 0.66276  | 10403 |
| NDC80 | Ruxolitinib         | -0.03683 | 0.489635 | 10403 |
| NDC80 | S-Trytyl-L-cysteine | -0.06359 | 0.441914 | 10403 |
| NDC80 | SB 216763           | 0.099568 | 0.03246  | 10403 |
| NDC80 | SB 505124           | 0.051638 | 0.464265 | 10403 |
| NDC80 | SB52334             | 0.036802 | 0.461813 | 10403 |
| NDC80 | SB590885            | 0.183063 | 3.48E-06 | 10403 |
| NDC80 | SGC0946             | 0.065813 | 0.176032 | 10403 |
| NDC80 | SL 0101-1           | 0.06816  | 0.350389 | 10403 |
| NDC80 | SN-38               | -0.02042 | 0.686919 | 10403 |
| NDC80 | SNX-2112            | -0.11909 | 0.000834 | 10403 |
| NDC80 | STF-62247           | -0.07166 | 0.070936 | 10403 |
| NDC80 | Salubrinal          | -0.02083 | 0.83934  | 10403 |
| NDC80 | Saracatinib         | -0.01624 | 0.869953 | 10403 |
| NDC80 | Shikonin            | -0.02605 | 0.659856 | 10403 |
| NDC80 | Sorafenib           | 0.032509 | 0.799031 | 10403 |
| NDC80 | Sunitinib           | -0.04468 | 0.583799 | 10403 |
| NDC80 | TO901317            | -0.07508 | 0.05973  | 10403 |
| NDC80 | TAE684              | 0.056689 | 0.618371 | 10403 |
| NDC80 | TAK-715             | -0.09858 | 0.00604  | 10403 |
| NDC80 | TG101348            | -0.13313 | 0.000145 | 10403 |
| NDC80 | TGX221              | 0.152636 | 0.01163  | 10403 |
| NDC80 | THZ-2-102-1         | -0.14468 | 4.09E-05 | 10403 |
| NDC80 | THZ-2-49            | -0.05529 | 0.142429 | 10403 |
| NDC80 | TL-1-85             | -0.11064 | 0.001886 | 10403 |
| NDC80 | TL-2-105            | -0.10437 | 0.004182 | 10403 |
| NDC80 | TPCA-1              | -0.12909 | 0.000213 | 10403 |
| NDC80 | TW 37               | -0.06621 | 0.129175 | 10403 |
| NDC80 | Talazoparib         | -0.00789 | 0.887018 | 10403 |
| NDC80 | Tamoxifen           | -0.01644 | 0.912118 | 10403 |
| NDC80 | Temozolomide        | 0.001683 | 0.987981 | 10403 |
| NDC80 | Temsirolimus        | -0.06375 | 0.174252 | 10403 |
| NDC80 | Thapsigargin        | -0.04798 | 0.445474 | 10403 |
| NDC80 | Tipifarnib          | 0.03112  | 0.665256 | 10403 |
| NDC80 | Tivozanib           | -0.06466 | 0.209977 | 10403 |
| NDC80 | Trametinib          | 0.272103 | 0        | 10403 |
| NDC80 | Tubastatin A        | -0.06577 | 0.06994  | 10403 |
| NDC80 | UNC0638             | -0.09437 | 0.00715  | 10403 |
| NDC80 | UNC1215             | 0.092146 | 0.04162  | 10403 |
| NDC80 | VNLG/124            | -0.01965 | 0.677795 | 10403 |
| NDC80 | VX-11e              | 0.132578 | 0.00106  | 10403 |
| NDC80 | VX-680              | -0.06814 | 0.462417 | 10403 |
| NDC80 | VX-702              | -0.02131 | 0.934547 | 10403 |

|       |                    |          |          |       |
|-------|--------------------|----------|----------|-------|
| NDC80 | Veliparib          | 0.002338 | 0.98004  | 10403 |
| NDC80 | Vinblastine        | -0.10165 | 0.013031 | 10403 |
| NDC80 | Vinorelbine        | -0.10129 | 0.032328 | 10403 |
| NDC80 | Vorinostat         | -0.16152 | 7E-06    | 10403 |
| NDC80 | WH-4-023           | 0.035975 | 0.678813 | 10403 |
| NDC80 | WZ-1-84            | 0.050151 | 0.539403 | 10403 |
| NDC80 | WZ3105             | -0.13633 | 9.42E-05 | 10403 |
| NDC80 | XAV939             | 0.030969 | 0.454662 | 10403 |
| NDC80 | XL-184             | -0.0243  | 0.641172 | 10403 |
| NDC80 | XMD11-85h          | 0.033065 | 0.862989 | 10403 |
| NDC80 | XMD13-2            | -0.10117 | 0.004528 | 10403 |
| NDC80 | XMD14-99           | 0.015202 | 0.726968 | 10403 |
| NDC80 | XMD15-27           | -0.0356  | 0.474581 | 10403 |
| NDC80 | XMD8-85            | 0.016504 | 0.875329 | 10403 |
| NDC80 | XMD8-92            | -0.00198 | 0.989489 | 10403 |
| NDC80 | Y-39983            | -0.11765 | 0.001146 | 10403 |
| NDC80 | YK 4-279           | 0.010626 | 0.879142 | 10403 |
| NDC80 | YM155              | -0.09855 | 0.026912 | 10403 |
| NDC80 | YM201636           | -0.09141 | 0.011892 | 10403 |
| NDC80 | Z-LLN1e-CHO        | -0.02332 | 0.790488 | 10403 |
| NDC80 | ZG-10              | -0.08732 | 0.164395 | 10403 |
| NDC80 | ZM-447439          | -0.09048 | 0.034801 | 10403 |
| NDC80 | ZSTK474            | -0.11513 | 0.001247 | 10403 |
| NDC80 | Zibotentan         | 0.005217 | 0.991093 | 10403 |
| NDC80 | piperlongumine     | 0.021249 | 0.668708 | 10403 |
| NDC80 | rTRAIL             | 0.030231 | 0.706907 | 10403 |
| NDC80 | selumetinib        | 0.271311 | 0        | 10403 |
| NEIL3 | (5Z)-7-Oxozeaenol  | 0.10982  | 0.003823 | 55247 |
| NEIL3 | 17-AAG             | 0.102539 | 0.005564 | 55247 |
| NEIL3 | 5-Fluorouracil     | -0.06468 | 0.080614 | 55247 |
| NEIL3 | 681640             | -0.04518 | 0.458097 | 55247 |
| NEIL3 | A-443654           | -0.06807 | 0.669833 | 55247 |
| NEIL3 | A-770041           | -0.02099 | 0.831808 | 55247 |
| NEIL3 | AC220              | -0.04626 | 0.333178 | 55247 |
| NEIL3 | AG-014699          | 0.050776 | 0.237132 | 55247 |
| NEIL3 | AICAR              | -0.18069 | 1.31E-06 | 55247 |
| NEIL3 | AKT inhibitor VIII | 0.062388 | 0.159641 | 55247 |
| NEIL3 | AMG-706            | 0.010052 | 0.900605 | 55247 |
| NEIL3 | AP-24534           | -0.115   | 0.002925 | 55247 |
| NEIL3 | AR-42              | -0.13713 | 9.59E-05 | 55247 |
| NEIL3 | AS601245           | 0.030308 | 0.607103 | 55247 |
| NEIL3 | AS605240           | -0.04156 | 0.352307 | 55247 |
| NEIL3 | AT-7519            | -0.1926  | 2.23E-08 | 55247 |
| NEIL3 | ATRA               | -0.1074  | 0.012142 | 55247 |
| NEIL3 | AUY922             | -0.01929 | 0.756878 | 55247 |
| NEIL3 | AZ628              | 0.047161 | 0.56315  | 55247 |
| NEIL3 | AZD6482            | -0.00796 | 0.897668 | 55247 |
| NEIL3 | AZD7762            | -0.24159 | 4.03E-11 | 55247 |
| NEIL3 | AZD8055            | -0.16339 | 1.33E-05 | 55247 |
| NEIL3 | Afatinib           | 0.130676 | 0.000231 | 55247 |

|       |                   |          |          |       |
|-------|-------------------|----------|----------|-------|
| NEIL3 | Axitinib          | -0.08795 | 0.057734 | 55247 |
| NEIL3 | BAY 61-3606       | -0.07529 | 0.06134  | 55247 |
| NEIL3 | BEZ235            | -0.07623 | 0.092592 | 55247 |
| NEIL3 | BHG712            | -0.13478 | 0.000132 | 55247 |
| NEIL3 | BI-2536           | -0.16587 | 0.05253  | 55247 |
| NEIL3 | BIRB 0796         | 0.052385 | 0.304456 | 55247 |
| NEIL3 | BIX02189          | -0.21009 | 1.23E-09 | 55247 |
| NEIL3 | BMS-509744        | 0.000131 | 0.999989 | 55247 |
| NEIL3 | BMS-536924        | -0.00806 | 0.934271 | 55247 |
| NEIL3 | BMS-708163        | 0.09777  | 0.011948 | 55247 |
| NEIL3 | BMS-754807        | 0.056621 | 0.282955 | 55247 |
| NEIL3 | BMS345541         | -0.2214  | 1.04E-10 | 55247 |
| NEIL3 | BX-795            | -0.17362 | 8.49E-06 | 55247 |
| NEIL3 | BX-912            | -0.24836 | 1.94E-13 | 55247 |
| NEIL3 | Belinostat        | -0.10681 | 0.003471 | 55247 |
| NEIL3 | Bexarotene        | -0.03634 | 0.640536 | 55247 |
| NEIL3 | Bicalutamide      | 0.016043 | 0.758667 | 55247 |
| NEIL3 | Bleomycin         | -0.0085  | 0.907619 | 55247 |
| NEIL3 | Bleomycin (50 uM) | 0.05121  | 0.168628 | 55247 |
| NEIL3 | Bortezomib        | -0.00311 | 0.978117 | 55247 |
| NEIL3 | Bosutinib         | -0.08264 | 0.076041 | 55247 |
| NEIL3 | Bryostatins 1     | 0.017271 | 0.780819 | 55247 |
| NEIL3 | CAL-101           | -0.13394 | 0.000201 | 55247 |
| NEIL3 | CAY10603          | -0.14568 | 3.14E-05 | 55247 |
| NEIL3 | CCT007093         | 0.056554 | 0.191066 | 55247 |
| NEIL3 | CCT018159         | -0.03538 | 0.51238  | 55247 |
| NEIL3 | CEP-701           | -0.19271 | 2.14E-07 | 55247 |
| NEIL3 | CGP-082996        | -0.08004 | 0.368451 | 55247 |
| NEIL3 | CGP-60474         | -0.06549 | 0.445796 | 55247 |
| NEIL3 | CH5424802         | -0.13838 | 0.000976 | 55247 |
| NEIL3 | CHIR-99021        | 0.015621 | 0.719938 | 55247 |
| NEIL3 | CI-1040           | 0.109907 | 0.006272 | 55247 |
| NEIL3 | CMK               | -0.04918 | 0.69221  | 55247 |
| NEIL3 | CP466722          | -0.22896 | 1.84E-11 | 55247 |
| NEIL3 | CP724714          | 0.09753  | 0.028728 | 55247 |
| NEIL3 | CUDC-101          | -0.12476 | 0.000516 | 55247 |
| NEIL3 | CX-5461           | -0.13801 | 0.000102 | 55247 |
| NEIL3 | Camptothecin      | -0.18966 | 7.49E-07 | 55247 |
| NEIL3 | Cetuximab         | 0.104525 | 0.007215 | 55247 |
| NEIL3 | Cisplatin         | -0.03368 | 0.518589 | 55247 |
| NEIL3 | Crizotinib        | -0.11355 | 0.268738 | 55247 |
| NEIL3 | Cyclopamine       | -0.0902  | 0.345783 | 55247 |
| NEIL3 | Cytarabine        | -0.18673 | 4.93E-06 | 55247 |
| NEIL3 | DMOG              | -0.19845 | 1.55E-07 | 55247 |
| NEIL3 | Dabrafenib        | 0.086788 | 0.032911 | 55247 |
| NEIL3 | Dasatinib         | 0.025399 | 0.737867 | 55247 |
| NEIL3 | Docetaxel         | 0.09123  | 0.014604 | 55247 |
| NEIL3 | Doxorubicin       | -0.04467 | 0.482734 | 55247 |
| NEIL3 | EHT 1864          | 0.013435 | 0.880596 | 55247 |
| NEIL3 | EKB-569           | -0.11593 | 0.002125 | 55247 |

|       |                    |          |          |       |
|-------|--------------------|----------|----------|-------|
| NEIL3 | EX-527             | -0.02145 | 0.863096 | 55247 |
| NEIL3 | Elesclomol         | 0.002792 | 0.958997 | 55247 |
| NEIL3 | Embelin            | -0.05005 | 0.382396 | 55247 |
| NEIL3 | Epothilone B       | 0.002482 | 0.969047 | 55247 |
| NEIL3 | Erlotinib          | 0.140806 | 0.037809 | 55247 |
| NEIL3 | Etoposide          | -0.15814 | 9.39E-05 | 55247 |
| NEIL3 | FH535              | 0.081302 | 0.064897 | 55247 |
| NEIL3 | FK866              | -0.17482 | 5.76E-07 | 55247 |
| NEIL3 | FMK                | -0.09874 | 0.069192 | 55247 |
| NEIL3 | FR-180204          | -0.04442 | 0.396976 | 55247 |
| NEIL3 | FTI-277            | 0.096957 | 0.015267 | 55247 |
| NEIL3 | Foretinib          | -0.12796 | 0.000613 | 55247 |
| NEIL3 | GDC0449            | -0.01094 | 0.937271 | 55247 |
| NEIL3 | GDC0941            | -0.0798  | 0.096106 | 55247 |
| NEIL3 | GNF-2              | -0.06277 | 0.780166 | 55247 |
| NEIL3 | GSK-650394         | -0.07819 | 0.200022 | 55247 |
| NEIL3 | GSK1070916         | -0.23193 | 1.99E-11 | 55247 |
| NEIL3 | GSK1904529A        | 0.077054 | 0.078663 | 55247 |
| NEIL3 | GSK2126458         | -0.10967 | 0.002629 | 55247 |
| NEIL3 | GSK269962A         | -0.05215 | 0.298044 | 55247 |
| NEIL3 | GSK429286A         | -0.15234 | 3.99E-05 | 55247 |
| NEIL3 | GSK690693          | -0.15702 | 8.55E-06 | 55247 |
| NEIL3 | GW 441756          | -0.01824 | 0.948577 | 55247 |
| NEIL3 | GW-2580            | 0.031621 | 0.942331 | 55247 |
| NEIL3 | GW843682X          | -0.17271 | 0.018349 | 55247 |
| NEIL3 | Gefitinib          | 0.116459 | 0.003013 | 55247 |
| NEIL3 | Gemcitabine        | -0.15209 | 0.000304 | 55247 |
| NEIL3 | Genentech Cpd 10   | -0.21569 | 4.16E-10 | 55247 |
| NEIL3 | HG-5-113-01        | -0.11495 | 0.068875 | 55247 |
| NEIL3 | HG-5-88-01         | -0.03765 | 0.821768 | 55247 |
| NEIL3 | HG-6-64-1          | -0.06482 | 0.154946 | 55247 |
| NEIL3 | I-BET-762          | -0.20353 | 2.09E-09 | 55247 |
| NEIL3 | IOX2               | 0.043401 | 0.456112 | 55247 |
| NEIL3 | IPA-3              | -0.14175 | 0.000148 | 55247 |
| NEIL3 | Imatinib           | -0.07743 | 0.552973 | 55247 |
| NEIL3 | Ispinesib Mesylate | -0.1477  | 2.78E-05 | 55247 |
| NEIL3 | JNJ-26854165       | -0.0308  | 0.579497 | 55247 |
| NEIL3 | JNK Inhibitor VIII | 0.038857 | 0.380726 | 55247 |
| NEIL3 | JNK-9L             | -0.02814 | 0.652731 | 55247 |
| NEIL3 | JQ1                | -0.07047 | 0.088636 | 55247 |
| NEIL3 | JQ12               | -0.062   | 0.229972 | 55247 |
| NEIL3 | JW-7-24-1          | -0.16462 | 2.08E-06 | 55247 |
| NEIL3 | JW-7-52-1          | -0.05217 | 0.621014 | 55247 |
| NEIL3 | KIN001-055         | 0.007112 | 0.937802 | 55247 |
| NEIL3 | KIN001-102         | -0.22405 | 4.91E-11 | 55247 |
| NEIL3 | KIN001-135         | 0.100736 | 0.269746 | 55247 |
| NEIL3 | KIN001-236         | -0.19077 | 4.98E-08 | 55247 |
| NEIL3 | KIN001-244         | -0.17462 | 6.8E-07  | 55247 |
| NEIL3 | KIN001-260         | -0.17827 | 3.14E-07 | 55247 |
| NEIL3 | KIN001-266         | -0.06544 | 0.151181 | 55247 |



|       |                    |          |          |       |
|-------|--------------------|----------|----------|-------|
| NEIL3 | KIN001-270         | -0.11464 | 0.00218  | 55247 |
| NEIL3 | KU-55933           | -0.11427 | 0.017579 | 55247 |
| NEIL3 | LAQ824             | -0.10456 | 0.006209 | 55247 |
| NEIL3 | LFM-A13            | 0.002871 | 0.966018 | 55247 |
| NEIL3 | LY317615           | -0.15581 | 5.02E-05 | 55247 |
| NEIL3 | Lapatinib          | 0.176275 | 0.00287  | 55247 |
| NEIL3 | Lenalidomide       | 0.011552 | 0.914616 | 55247 |
| NEIL3 | Linifanib          | -0.03367 | 0.541234 | 55247 |
| NEIL3 | Lisitinib          | 0.045446 | 0.474193 | 55247 |
| NEIL3 | MG-132             | 0.019396 | 0.868005 | 55247 |
| NEIL3 | MK-2206            | -0.12789 | 0.004357 | 55247 |
| NEIL3 | MLN4924            | -0.00125 | 0.986131 | 55247 |
| NEIL3 | MP470              | 0.002307 | 0.965269 | 55247 |
| NEIL3 | MPS-1-IN-1         | -0.13657 | 0.000157 | 55247 |
| NEIL3 | MS-275             | -0.21263 | 0.001895 | 55247 |
| NEIL3 | Masitinib          | -0.12167 | 0.000796 | 55247 |
| NEIL3 | Methotrexate       | -0.31524 | 7.76E-20 | 55247 |
| NEIL3 | Midostaurin        | -0.04654 | 0.307163 | 55247 |
| NEIL3 | Mitomycin C        | -0.13044 | 0.002539 | 55247 |
| NEIL3 | NG-25              | -0.14267 | 4.56E-05 | 55247 |
| NEIL3 | NPK76-II-72-1      | -0.28002 | 4.5E-17  | 55247 |
| NEIL3 | NSC-207895         | -0.08394 | 0.043376 | 55247 |
| NEIL3 | NSC-87877          | 0.095164 | 0.060861 | 55247 |
| NEIL3 | NU-7441            | -0.05465 | 0.416049 | 55247 |
| NEIL3 | Navitoclax         | -0.23854 | 1.54E-11 | 55247 |
| NEIL3 | Nilotinib          | -0.10801 | 0.014158 | 55247 |
| NEIL3 | Nutlin-3a (-)      | 0.059716 | 0.198107 | 55247 |
| NEIL3 | OSI-027            | -0.12793 | 0.000305 | 55247 |
| NEIL3 | OSI-930            | -0.06986 | 0.07008  | 55247 |
| NEIL3 | OSU-03012          | -0.09373 | 0.034122 | 55247 |
| NEIL3 | Obatoclax Mesylate | -0.04481 | 0.352285 | 55247 |
| NEIL3 | Olaparib           | 0.004552 | 0.934227 | 55247 |
| NEIL3 | PAC-1              | -0.16094 | 2.5E-05  | 55247 |
| NEIL3 | PD-0325901         | 0.147791 | 8.91E-05 | 55247 |
| NEIL3 | PD-0332991         | -0.13725 | 0.00196  | 55247 |
| NEIL3 | PD-173074          | -0.03233 | 0.841615 | 55247 |
| NEIL3 | PF-4708671         | 0.070856 | 0.407267 | 55247 |
| NEIL3 | PF-562271          | -0.02666 | 0.669433 | 55247 |
| NEIL3 | PFI-1              | -0.04095 | 0.407747 | 55247 |
| NEIL3 | PHA-665752         | 0.057515 | 0.695998 | 55247 |
| NEIL3 | PHA-793887         | -0.18313 | 8.72E-08 | 55247 |
| NEIL3 | PI-103             | -0.13449 | 0.000141 | 55247 |
| NEIL3 | PIK-93             | -0.24038 | 1.14E-12 | 55247 |
| NEIL3 | PLX4720            | 0.111476 | 0.003369 | 55247 |
| NEIL3 | Paclitaxel         | -0.06126 | 0.580769 | 55247 |
| NEIL3 | Parthenolide       | -0.11868 | 0.195667 | 55247 |
| NEIL3 | Pazopanib          | -0.00301 | 0.968857 | 55247 |
| NEIL3 | Phenformin         | -0.08908 | 0.015453 | 55247 |
| NEIL3 | Pyrimethamine      | -0.10715 | 0.303232 | 55247 |
| NEIL3 | QL-VIII-58         | -0.07315 | 0.310903 | 55247 |

|       |                     |          |          |       |
|-------|---------------------|----------|----------|-------|
| NEIL3 | QL-X-138            | -0.15513 | 1.12E-05 | 55247 |
| NEIL3 | QL-XI-92            | -0.19352 | 2.26E-08 | 55247 |
| NEIL3 | QL-XII-47           | -0.10395 | 0.006339 | 55247 |
| NEIL3 | QL-XII-61           | -0.14443 | 0.012249 | 55247 |
| NEIL3 | QS11                | -0.07931 | 0.15059  | 55247 |
| NEIL3 | RDEA119             | 0.185242 | 7.38E-08 | 55247 |
| NEIL3 | RO-3306             | 0.024257 | 0.592755 | 55247 |
| NEIL3 | Rapamycin           | -0.05619 | 0.642562 | 55247 |
| NEIL3 | Roscovitine         | 0.037619 | 0.847233 | 55247 |
| NEIL3 | Ruxolitinib         | -0.07095 | 0.125817 | 55247 |
| NEIL3 | S-Trityl-L-cysteine | -0.10349 | 0.167208 | 55247 |
| NEIL3 | SB 216763           | 0.026101 | 0.626887 | 55247 |
| NEIL3 | SB 505124           | 0.010384 | 0.923217 | 55247 |
| NEIL3 | SB52334             | 0.069105 | 0.114729 | 55247 |
| NEIL3 | SB590885            | 0.135436 | 0.001225 | 55247 |
| NEIL3 | SGC0946             | 0.0526   | 0.307157 | 55247 |
| NEIL3 | SL 0101-1           | 0.054923 | 0.464551 | 55247 |
| NEIL3 | SN-38               | -0.11747 | 0.002591 | 55247 |
| NEIL3 | SNX-2112            | -0.18042 | 2.24E-07 | 55247 |
| NEIL3 | STF-62247           | -0.17933 | 1.26E-06 | 55247 |
| NEIL3 | Salubrinal          | -0.09142 | 0.254751 | 55247 |
| NEIL3 | Saracatinib         | -0.0053  | 0.962621 | 55247 |
| NEIL3 | Shikonin            | -0.05702 | 0.264275 | 55247 |
| NEIL3 | Sorafenib           | -0.00652 | 0.964024 | 55247 |
| NEIL3 | Sunitinib           | -0.1555  | 0.015469 | 55247 |
| NEIL3 | T0901317            | -0.15393 | 3.64E-05 | 55247 |
| NEIL3 | TAE684              | -0.06802 | 0.52933  | 55247 |
| NEIL3 | TAK-715             | -0.16475 | 2.53E-06 | 55247 |
| NEIL3 | TG101348            | -0.20265 | 3.41E-09 | 55247 |
| NEIL3 | TGX221              | 0.069031 | 0.294188 | 55247 |
| NEIL3 | THZ-2-102-1         | -0.16395 | 2.94E-06 | 55247 |
| NEIL3 | THZ-2-49            | -0.19796 | 1.72E-08 | 55247 |
| NEIL3 | TL-1-85             | -0.15612 | 7.82E-06 | 55247 |
| NEIL3 | TL-2-105            | -0.16302 | 4.28E-06 | 55247 |
| NEIL3 | TPCA-1              | -0.20286 | 2.76E-09 | 55247 |
| NEIL3 | TW 37               | -0.05935 | 0.183976 | 55247 |
| NEIL3 | Talazoparib         | -0.05774 | 0.193042 | 55247 |
| NEIL3 | Tamoxifen           | -0.04885 | 0.651968 | 55247 |
| NEIL3 | Temozolomide        | -0.05127 | 0.448059 | 55247 |
| NEIL3 | Temsirolimus        | -0.1082  | 0.010883 | 55247 |
| NEIL3 | Thapsigargin        | 0.003755 | 0.969469 | 55247 |
| NEIL3 | Tipifarnib          | -0.01232 | 0.888045 | 55247 |
| NEIL3 | Tivozanib           | -0.05981 | 0.259706 | 55247 |
| NEIL3 | Trametinib          | 0.24718  | 9.29E-13 | 55247 |
| NEIL3 | Tubastatin A        | -0.17929 | 2.11E-07 | 55247 |
| NEIL3 | UNC0638             | -0.14393 | 2.61E-05 | 55247 |
| NEIL3 | UNC1215             | 0.10334  | 0.020738 | 55247 |
| NEIL3 | VNLG/124            | -0.13069 | 0.000551 | 55247 |
| NEIL3 | VX-11e              | 0.057739 | 0.210317 | 55247 |
| NEIL3 | VX-680              | -0.18376 | 0.013724 | 55247 |

|       |                    |          |          |       |
|-------|--------------------|----------|----------|-------|
| NEIL3 | VX-702             | -0.01567 | 0.95291  | 55247 |
| NEIL3 | Veliparib          | 0.03016  | 0.67977  | 55247 |
| NEIL3 | Vinblastine        | -0.16962 | 1.32E-05 | 55247 |
| NEIL3 | Vinorelbine        | -0.07554 | 0.127452 | 55247 |
| NEIL3 | Vorinostat         | -0.21071 | 2.99E-09 | 55247 |
| NEIL3 | WH-4-023           | 0.011286 | 0.90772  | 55247 |
| NEIL3 | WZ-1-84            | -0.00263 | 0.979391 | 55247 |
| NEIL3 | WZ3105             | -0.20546 | 1.95E-09 | 55247 |
| NEIL3 | XAV939             | 0.034867 | 0.395484 | 55247 |
| NEIL3 | XL-184             | -0.07642 | 0.077595 | 55247 |
| NEIL3 | XMD11-85h          | -0.07957 | 0.584688 | 55247 |
| NEIL3 | XMD13-2            | -0.17691 | 3.21E-07 | 55247 |
| NEIL3 | XMD14-99           | -0.14085 | 9.83E-05 | 55247 |
| NEIL3 | XMD15-27           | -0.12295 | 0.002521 | 55247 |
| NEIL3 | XMD8-85            | -0.09669 | 0.203383 | 55247 |
| NEIL3 | XMD8-92            | -0.06608 | 0.519468 | 55247 |
| NEIL3 | Y-39983            | -0.21926 | 3.15E-10 | 55247 |
| NEIL3 | YK 4-279           | -0.04834 | 0.367221 | 55247 |
| NEIL3 | YM155              | -0.07232 | 0.124696 | 55247 |
| NEIL3 | YM201636           | -0.17818 | 3.55E-07 | 55247 |
| NEIL3 | Z-LLN1e-CHO        | -0.06354 | 0.401461 | 55247 |
| NEIL3 | ZG-10              | -0.13401 | 0.021366 | 55247 |
| NEIL3 | ZM-447439          | -0.18113 | 5.79E-06 | 55247 |
| NEIL3 | ZSTK474            | -0.16687 | 1.87E-06 | 55247 |
| NEIL3 | Zibotentan         | -0.03712 | 0.882923 | 55247 |
| NEIL3 | piperlongumine     | -0.00457 | 0.93724  | 55247 |
| NEIL3 | rTRAIL             | 1.89E-05 | 0.999712 | 55247 |
| NEIL3 | selumetinib        | 0.182279 | 1.34E-07 | 55247 |
| NUF2  | (5Z)-7-Oxozeaenol  | 0.162705 | 8.74E-06 | 83540 |
| NUF2  | 17-AAG             | 0.227783 | 1.54E-10 | 83540 |
| NUF2  | 5-Fluorouracil     | -0.06662 | 0.071245 | 83540 |
| NUF2  | 681640             | 0.049848 | 0.40394  | 83540 |
| NUF2  | A-443654           | -0.05298 | 0.760534 | 83540 |
| NUF2  | A-770041           | 0.01898  | 0.851581 | 83540 |
| NUF2  | AC220              | 0.006006 | 0.929536 | 83540 |
| NUF2  | AG-014699          | 0.073514 | 0.076371 | 83540 |
| NUF2  | AICAR              | -0.10785 | 0.005085 | 83540 |
| NUF2  | AKT inhibitor VIII | 0.141846 | 0.000494 | 83540 |
| NUF2  | AMG-706            | 0.088902 | 0.07972  | 83540 |
| NUF2  | AP-24534           | -0.0203  | 0.662331 | 83540 |
| NUF2  | AR-42              | -0.17706 | 3.47E-07 | 83540 |
| NUF2  | AS601245           | 0.119576 | 0.007344 | 83540 |
| NUF2  | AS605240           | 0.006055 | 0.910254 | 83540 |
| NUF2  | AT-7519            | -0.16648 | 1.57E-06 | 83540 |
| NUF2  | ATRA               | -0.02665 | 0.625477 | 83540 |
| NUF2  | AUY922             | 0.069444 | 0.149924 | 83540 |
| NUF2  | AZ628              | 0.17033  | 0.007428 | 83540 |
| NUF2  | AZD6482            | 0.069122 | 0.107129 | 83540 |
| NUF2  | AZD7762            | -0.11839 | 0.00208  | 83540 |
| NUF2  | AZD8055            | -0.07368 | 0.061778 | 83540 |

|      |                   |          |          |       |
|------|-------------------|----------|----------|-------|
| NUF2 | Afatinib          | 0.180199 | 2.02E-07 | 83540 |
| NUF2 | Axitinib          | -0.01557 | 0.815308 | 83540 |
| NUF2 | BAY 61-3606       | -0.03945 | 0.358731 | 83540 |
| NUF2 | BEZ235            | 0.043796 | 0.379213 | 83540 |
| NUF2 | BHG712            | -0.07158 | 0.050363 | 83540 |
| NUF2 | BI-2536           | -0.07598 | 0.440105 | 83540 |
| NUF2 | BIRB 0796         | 0.091712 | 0.051497 | 83540 |
| NUF2 | BIX02189          | -0.0924  | 0.010754 | 83540 |
| NUF2 | BMS-509744        | 0.030174 | 0.771611 | 83540 |
| NUF2 | BMS-536924        | 0.009703 | 0.921981 | 83540 |
| NUF2 | BMS-708163        | 0.127746 | 0.000859 | 83540 |
| NUF2 | BMS-754807        | 0.042569 | 0.443814 | 83540 |
| NUF2 | BMS345541         | -0.15843 | 5.41E-06 | 83540 |
| NUF2 | BX-795            | -0.07005 | 0.109463 | 83540 |
| NUF2 | BX-912            | -0.18041 | 1.53E-07 | 83540 |
| NUF2 | Belinostat        | -0.15483 | 1.53E-05 | 83540 |
| NUF2 | Bexarotene        | 0.046535 | 0.515252 | 83540 |
| NUF2 | Bicalutamide      | 0.048918 | 0.274571 | 83540 |
| NUF2 | Bleomycin         | 0.089502 | 0.063785 | 83540 |
| NUF2 | Bleomycin (50 uM) | 0.14388  | 4.55E-05 | 83540 |
| NUF2 | Bortezomib        | 0.064653 | 0.419821 | 83540 |
| NUF2 | Bosutinib         | 0.032438 | 0.573958 | 83540 |
| NUF2 | Bryostatins 1     | 0.088674 | 0.057302 | 83540 |
| NUF2 | CAL-101           | -0.09132 | 0.01345  | 83540 |
| NUF2 | CAY10603          | -0.18161 | 1.55E-07 | 83540 |
| NUF2 | CCT007093         | 0.126602 | 0.001507 | 83540 |
| NUF2 | CCT018159         | 0.027985 | 0.619462 | 83540 |
| NUF2 | CEP-701           | -0.0685  | 0.091096 | 83540 |
| NUF2 | CGP-082996        | -0.00513 | 0.970049 | 83540 |
| NUF2 | CGP-60474         | -0.01939 | 0.856763 | 83540 |
| NUF2 | CH5424802         | -0.06476 | 0.216892 | 83540 |
| NUF2 | CHIR-99021        | 0.040315 | 0.311278 | 83540 |
| NUF2 | CI-1040           | 0.16167  | 3.05E-05 | 83540 |
| NUF2 | CMK               | 0.006306 | 0.967793 | 83540 |
| NUF2 | CP466722          | -0.16033 | 3.92E-06 | 83540 |
| NUF2 | CP724714          | 0.084297 | 0.068323 | 83540 |
| NUF2 | CUDC-101          | -0.15179 | 1.96E-05 | 83540 |
| NUF2 | CX-5461           | -0.14833 | 2.74E-05 | 83540 |
| NUF2 | Camptothecin      | -0.08851 | 0.032169 | 83540 |
| NUF2 | Cetuximab         | 0.132588 | 0.000512 | 83540 |
| NUF2 | Cisplatin         | 0.002099 | 0.974797 | 83540 |
| NUF2 | Crizotinib        | -0.04128 | 0.79553  | 83540 |
| NUF2 | Cyclopamine       | -0.0143  | 0.9213   | 83540 |
| NUF2 | Cytarabine        | -0.01325 | 0.829197 | 83540 |
| NUF2 | DMOG              | -0.07193 | 0.095228 | 83540 |
| NUF2 | Dabrafenib        | 0.142381 | 0.000205 | 83540 |
| NUF2 | Dasatinib         | 0.094646 | 0.148764 | 83540 |
| NUF2 | Docetaxel         | 0.145777 | 7.08E-05 | 83540 |
| NUF2 | Doxorubicin       | 0.020384 | 0.788906 | 83540 |
| NUF2 | EHT 1864          | 0.094537 | 0.077927 | 83540 |

|      |                    |          |          |       |
|------|--------------------|----------|----------|-------|
| NUF2 | EKB-569            | -0.00663 | 0.891261 | 83540 |
| NUF2 | EX-527             | 0.019796 | 0.874962 | 83540 |
| NUF2 | Elesclomol         | 0.008778 | 0.869613 | 83540 |
| NUF2 | Embelin            | 0.035293 | 0.573292 | 83540 |
| NUF2 | Epothilone B       | 0.064444 | 0.188613 | 83540 |
| NUF2 | Erlotinib          | 0.140869 | 0.037694 | 83540 |
| NUF2 | Etoposide          | -0.09986 | 0.018723 | 83540 |
| NUF2 | FH535              | 0.118389 | 0.004614 | 83540 |
| NUF2 | FK866              | -0.2099  | 1.36E-09 | 83540 |
| NUF2 | FMK                | 0.009983 | 0.910838 | 83540 |
| NUF2 | FR-180204          | 0.039034 | 0.467557 | 83540 |
| NUF2 | FTI-277            | 0.16547  | 1.79E-05 | 83540 |
| NUF2 | Foretinib          | -0.07787 | 0.049359 | 83540 |
| NUF2 | GDC0449            | 0.047872 | 0.61033  | 83540 |
| NUF2 | GDC0941            | -0.00983 | 0.89148  | 83540 |
| NUF2 | GNF-2              | 0.023843 | 0.934378 | 83540 |
| NUF2 | GSK-650394         | 0.033807 | 0.664782 | 83540 |
| NUF2 | GSK1070916         | -0.17975 | 3.01E-07 | 83540 |
| NUF2 | GSK1904529A        | 0.090151 | 0.036601 | 83540 |
| NUF2 | GSK2126458         | -0.09806 | 0.007592 | 83540 |
| NUF2 | GSK269962A         | 0.029018 | 0.613706 | 83540 |
| NUF2 | GSK429286A         | -0.11382 | 0.002821 | 83540 |
| NUF2 | GSK690693          | -0.18195 | 1.94E-07 | 83540 |
| NUF2 | GW 441756          | 0.005418 | 0.991337 | 83540 |
| NUF2 | GW-2580            | 0.031551 | 0.942708 | 83540 |
| NUF2 | GW843682X          | -0.10632 | 0.178086 | 83540 |
| NUF2 | Gefitinib          | 0.17209  | 5.63E-06 | 83540 |
| NUF2 | Gemcitabine        | -0.05327 | 0.272849 | 83540 |
| NUF2 | Genentech Cpd 10   | -0.16476 | 2.59E-06 | 83540 |
| NUF2 | HG-5-113-01        | -0.06437 | 0.360153 | 83540 |
| NUF2 | HG-5-88-01         | -0.0162  | 0.936049 | 83540 |
| NUF2 | HG-6-64-1          | 0.085463 | 0.048328 | 83540 |
| NUF2 | I-BET-762          | -0.17858 | 1.72E-07 | 83540 |
| NUF2 | IOX2               | 0.019057 | 0.784304 | 83540 |
| NUF2 | IPA-3              | -0.10791 | 0.00457  | 83540 |
| NUF2 | Imatinib           | -0.0093  | 0.967994 | 83540 |
| NUF2 | Ispinesib Mesylate | -0.09897 | 0.006166 | 83540 |
| NUF2 | JNJ-26854165       | 0.097776 | 0.027365 | 83540 |
| NUF2 | JNK Inhibitor VIII | 0.101124 | 0.01278  | 83540 |
| NUF2 | JNK-9L             | 0.042355 | 0.461654 | 83540 |
| NUF2 | JQ1                | 0.018899 | 0.696865 | 83540 |
| NUF2 | JQ12               | 0.007146 | 0.918477 | 83540 |
| NUF2 | JW-7-24-1          | -0.15391 | 9.79E-06 | 83540 |
| NUF2 | JW-7-52-1          | 0.035646 | 0.753387 | 83540 |
| NUF2 | KIN001-055         | 0.073749 | 0.16525  | 83540 |
| NUF2 | KIN001-102         | -0.14335 | 3.77E-05 | 83540 |
| NUF2 | KIN001-135         | 0.078203 | 0.420727 | 83540 |
| NUF2 | KIN001-236         | -0.08895 | 0.015114 | 83540 |
| NUF2 | KIN001-244         | -0.1247  | 0.00049  | 83540 |
| NUF2 | KIN001-260         | -0.11925 | 0.000804 | 83540 |

|      |                    |          |          |       |
|------|--------------------|----------|----------|-------|
| NUF2 | KIN001-266         | -0.0439  | 0.365726 | 83540 |
| NUF2 | KIN001-270         | -0.15663 | 1.94E-05 | 83540 |
| NUF2 | KU-55933           | -0.03839 | 0.548267 | 83540 |
| NUF2 | LAQ824             | -0.09669 | 0.011899 | 83540 |
| NUF2 | LFM-A13            | 0.077375 | 0.101175 | 83540 |
| NUF2 | LY317615           | -0.04019 | 0.374791 | 83540 |
| NUF2 | Lapatinib          | 0.192914 | 0.000969 | 83540 |
| NUF2 | Lenalidomide       | -0.00921 | 0.935175 | 83540 |
| NUF2 | Linifanib          | 0.049302 | 0.33057  | 83540 |
| NUF2 | Lisitinib          | 0.017453 | 0.826478 | 83540 |
| NUF2 | MG-132             | 0.051053 | 0.58694  | 83540 |
| NUF2 | MK-2206            | -0.07165 | 0.140811 | 83540 |
| NUF2 | MLN4924            | 0.092814 | 0.071951 | 83540 |
| NUF2 | MP470              | -0.09242 | 0.026791 | 83540 |
| NUF2 | MPS-1-IN-1         | -0.10759 | 0.003311 | 83540 |
| NUF2 | MS-275             | -0.15323 | 0.02856  | 83540 |
| NUF2 | Masitinib          | -0.0676  | 0.073458 | 83540 |
| NUF2 | Methotrexate       | -0.15478 | 1.79E-05 | 83540 |
| NUF2 | Midostaurin        | 0.065824 | 0.12995  | 83540 |
| NUF2 | Mitomycin C        | -0.03095 | 0.578707 | 83540 |
| NUF2 | NG-25              | -0.12205 | 0.00054  | 83540 |
| NUF2 | NPK76-II-72-1      | -0.23595 | 2.5E-12  | 83540 |
| NUF2 | NSC-207895         | -0.14632 | 0.000198 | 83540 |
| NUF2 | NSC-87877          | 0.132306 | 0.008567 | 83540 |
| NUF2 | NU-7441            | -0.00516 | 0.964206 | 83540 |
| NUF2 | Navitoclax         | -0.2146  | 1.64E-09 | 83540 |
| NUF2 | Nilotinib          | -0.03406 | 0.535621 | 83540 |
| NUF2 | Nutlin-3a (-)      | 0.125343 | 0.002586 | 83540 |
| NUF2 | OSI-027            | -0.14093 | 6.44E-05 | 83540 |
| NUF2 | OSI-930            | -0.02114 | 0.625037 | 83540 |
| NUF2 | OSU-03012          | -0.00765 | 0.906929 | 83540 |
| NUF2 | Obatoclax Mesylate | 0.01577  | 0.779963 | 83540 |
| NUF2 | Olaparib           | 0.019163 | 0.697775 | 83540 |
| NUF2 | PAC-1              | -0.08058 | 0.047874 | 83540 |
| NUF2 | PD-0325901         | 0.20995  | 1.27E-08 | 83540 |
| NUF2 | PD-0332991         | 0.041362 | 0.466998 | 83540 |
| NUF2 | PD-173074          | 0.019687 | 0.91378  | 83540 |
| NUF2 | PF-4708671         | 0.094885 | 0.233459 | 83540 |
| NUF2 | PF-562271          | 0.049408 | 0.371422 | 83540 |
| NUF2 | PFI-1              | 0.064245 | 0.160658 | 83540 |
| NUF2 | PHA-665752         | 0.123119 | 0.279668 | 83540 |
| NUF2 | PHA-793887         | -0.17196 | 5.42E-07 | 83540 |
| NUF2 | PI-103             | -0.16179 | 3.83E-06 | 83540 |
| NUF2 | PIK-93             | -0.19256 | 1.81E-08 | 83540 |
| NUF2 | PLX4720            | 0.128169 | 0.000602 | 83540 |
| NUF2 | Paclitaxel         | 0.016579 | 0.914343 | 83540 |
| NUF2 | Parthenolide       | -0.03905 | 0.733782 | 83540 |
| NUF2 | Pazopanib          | 0.081612 | 0.097254 | 83540 |
| NUF2 | Phenformin         | -0.0891  | 0.015421 | 83540 |
| NUF2 | Pyrimethamine      | -0.05329 | 0.650298 | 83540 |

|      |                     |          |          |       |
|------|---------------------|----------|----------|-------|
| NUF2 | QL-VIII-58          | 7.13E-05 | 0.999404 | 83540 |
| NUF2 | QL-X-138            | -0.18275 | 1.75E-07 | 83540 |
| NUF2 | QL-XI-92            | -0.1463  | 3.11E-05 | 83540 |
| NUF2 | QL-XII-47           | -0.11437 | 0.002467 | 83540 |
| NUF2 | QL-XII-61           | -0.13227 | 0.02319  | 83540 |
| NUF2 | QS11                | -0.07563 | 0.172021 | 83540 |
| NUF2 | RDEA119             | 0.257581 | 2.32E-14 | 83540 |
| NUF2 | RO-3306             | 0.104893 | 0.009571 | 83540 |
| NUF2 | Rapamycin           | -0.04762 | 0.706514 | 83540 |
| NUF2 | Roscovitine         | 0.021764 | 0.918154 | 83540 |
| NUF2 | Ruxolitinib         | -0.05546 | 0.255876 | 83540 |
| NUF2 | S-Trytyl-L-cysteine | -0.05326 | 0.535606 | 83540 |
| NUF2 | SB 216763           | 0.110701 | 0.016195 | 83540 |
| NUF2 | SB 505124           | 0.082909 | 0.18123  | 83540 |
| NUF2 | SB52334             | -0.00446 | 0.946446 | 83540 |
| NUF2 | SB590885            | 0.150236 | 0.000247 | 83540 |
| NUF2 | SGC0946             | 0.07842  | 0.09306  | 83540 |
| NUF2 | SL 0101-1           | 0.097856 | 0.185569 | 83540 |
| NUF2 | SN-38               | -0.00749 | 0.89398  | 83540 |
| NUF2 | SNX-2112            | -0.12105 | 0.000676 | 83540 |
| NUF2 | STF-62247           | -0.06883 | 0.083686 | 83540 |
| NUF2 | Salubrinal          | -0.00424 | 0.969435 | 83540 |
| NUF2 | Saracatinib         | 0.043908 | 0.623475 | 83540 |
| NUF2 | Shikonin            | -0.04745 | 0.371499 | 83540 |
| NUF2 | Sorafenib           | 0.068745 | 0.508562 | 83540 |
| NUF2 | Sunitinib           | 0.000321 | 0.997857 | 83540 |
| NUF2 | T0901317            | -0.11275 | 0.003288 | 83540 |
| NUF2 | TAE684              | -0.02968 | 0.828112 | 83540 |
| NUF2 | TAK-715             | -0.09101 | 0.011593 | 83540 |
| NUF2 | TG101348            | -0.15244 | 1.18E-05 | 83540 |
| NUF2 | TGX221              | 0.176342 | 0.002999 | 83540 |
| NUF2 | THZ-2-102-1         | -0.17154 | 9.44E-07 | 83540 |
| NUF2 | THZ-2-49            | -0.09475 | 0.009403 | 83540 |
| NUF2 | TL-1-85             | -0.10522 | 0.003237 | 83540 |
| NUF2 | TL-2-105            | -0.11143 | 0.002128 | 83540 |
| NUF2 | TPCA-1              | -0.15709 | 5.44E-06 | 83540 |
| NUF2 | TW 37               | -0.05603 | 0.214433 | 83540 |
| NUF2 | Talazoparib         | -0.02123 | 0.676773 | 83540 |
| NUF2 | Tamoxifen           | 0.051413 | 0.629552 | 83540 |
| NUF2 | Temozolomide        | -0.00648 | 0.950274 | 83540 |
| NUF2 | Temsirolimus        | -0.03706 | 0.476231 | 83540 |
| NUF2 | Thapsigargin        | 0.002309 | 0.981564 | 83540 |
| NUF2 | Tipifarnib          | 0.07888  | 0.152812 | 83540 |
| NUF2 | Tivozanib           | -0.00079 | 0.992371 | 83540 |
| NUF2 | Trametinib          | 0.313489 | 0        | 83540 |
| NUF2 | Tubastatin A        | -0.1512  | 1.44E-05 | 83540 |
| NUF2 | UNC0638             | -0.14108 | 3.82E-05 | 83540 |
| NUF2 | UNC1215             | 0.113039 | 0.01105  | 83540 |
| NUF2 | VNLG/124            | -0.02452 | 0.594115 | 83540 |
| NUF2 | VX-11e              | 0.10679  | 0.010545 | 83540 |

|      |                    |          |          |       |
|------|--------------------|----------|----------|-------|
| NUF2 | VX-680             | -0.06674 | 0.473567 | 83540 |
| NUF2 | VX-702             | 0.010488 | 0.974173 | 83540 |
| NUF2 | Veliparib          | 0.070056 | 0.270186 | 83540 |
| NUF2 | Vinblastine        | -0.03672 | 0.431643 | 83540 |
| NUF2 | Vinorelbine        | -0.0182  | 0.780593 | 83540 |
| NUF2 | Vorinostat         | -0.22756 | 1.27E-10 | 83540 |
| NUF2 | WH-4-023           | 0.105495 | 0.142078 | 83540 |
| NUF2 | WZ-1-84            | 0.106752 | 0.139533 | 83540 |
| NUF2 | WZ3105             | -0.15948 | 4.16E-06 | 83540 |
| NUF2 | XAV939             | 0.093791 | 0.013871 | 83540 |
| NUF2 | XL-184             | 0.013408 | 0.812025 | 83540 |
| NUF2 | XMD11-85h          | 0.034359 | 0.856377 | 83540 |
| NUF2 | XMD13-2            | -0.13319 | 0.000151 | 83540 |
| NUF2 | XMD14-99           | -0.08278 | 0.026818 | 83540 |
| NUF2 | XMD15-27           | -0.05716 | 0.212045 | 83540 |
| NUF2 | XMD8-85            | 0.032667 | 0.730504 | 83540 |
| NUF2 | XMD8-92            | -0.00076 | 0.995583 | 83540 |
| NUF2 | Y-39983            | -0.16199 | 4.97E-06 | 83540 |
| NUF2 | YK 4-279           | 0.073819 | 0.134164 | 83540 |
| NUF2 | YM155              | -0.10603 | 0.015856 | 83540 |
| NUF2 | YM201636           | -0.14426 | 4.63E-05 | 83540 |
| NUF2 | Z-LLN1e-CHO        | 0.050727 | 0.522248 | 83540 |
| NUF2 | ZG-10              | -0.12286 | 0.037403 | 83540 |
| NUF2 | ZM-447439          | -0.06407 | 0.1552   | 83540 |
| NUF2 | ZSTK474            | -0.12502 | 0.000431 | 83540 |
| NUF2 | Zibotentan         | 0.033093 | 0.906877 | 83540 |
| NUF2 | piperlongumine     | 0.04197  | 0.350311 | 83540 |
| NUF2 | rTRAIL             | 0.069136 | 0.290128 | 83540 |
| NUF2 | selumetinib        | 0.276291 | 0        | 83540 |
| OIP5 | (5Z)-7-Oxozeaenol  | 0.226556 | 1.7E-10  | 11339 |
| OIP5 | 17-AAG             | 0.130729 | 0.000348 | 11339 |
| OIP5 | 5-Fluorouracil     | -0.03031 | 0.43554  | 11339 |
| OIP5 | 681640             | 0.000912 | 0.991215 | 11339 |
| OIP5 | A-443654           | -0.05626 | 0.739341 | 11339 |
| OIP5 | A-770041           | -0.02771 | 0.773135 | 11339 |
| OIP5 | AC220              | -0.00998 | 0.875487 | 11339 |
| OIP5 | AG-014699          | 0.075907 | 0.066516 | 11339 |
| OIP5 | AICAR              | -0.09231 | 0.017906 | 11339 |
| OIP5 | AKT inhibitor VIII | 0.039789 | 0.398778 | 11339 |
| OIP5 | AMG-706            | 0.050285 | 0.389731 | 11339 |
| OIP5 | AP-24534           | -0.00383 | 0.9425   | 11339 |
| OIP5 | AR-42              | -0.10788 | 0.002413 | 11339 |
| OIP5 | AS601245           | 0.07467  | 0.12899  | 11339 |
| OIP5 | AS605240           | 0.019758 | 0.687749 | 11339 |
| OIP5 | AT-7519            | -0.14106 | 5.46E-05 | 11339 |
| OIP5 | ATRA               | -0.06807 | 0.142294 | 11339 |
| OIP5 | AUY922             | 0.056583 | 0.259112 | 11339 |
| OIP5 | AZ628              | 0.209782 | 0.00067  | 11339 |
| OIP5 | AZD6482            | 0.06511  | 0.134693 | 11339 |
| OIP5 | AZD7762            | -0.0851  | 0.031383 | 11339 |



|      |                   |          |          |       |
|------|-------------------|----------|----------|-------|
| OIP5 | AZD8055           | -0.08983 | 0.020989 | 11339 |
| OIP5 | Afatinib          | 0.019505 | 0.635495 | 11339 |
| OIP5 | Axitinib          | -0.04334 | 0.416752 | 11339 |
| OIP5 | BAY 61-3606       | 0.021579 | 0.634457 | 11339 |
| OIP5 | BEZ235            | 0.036669 | 0.474593 | 11339 |
| OIP5 | BHG712            | -0.01981 | 0.616325 | 11339 |
| OIP5 | BI-2536           | -0.10072 | 0.274119 | 11339 |
| OIP5 | BIRB 0796         | 0.039841 | 0.453045 | 11339 |
| OIP5 | BIX02189          | -0.05678 | 0.129396 | 11339 |
| OIP5 | BMS-509744        | 0.050443 | 0.600638 | 11339 |
| OIP5 | BMS-536924        | -0.00251 | 0.980269 | 11339 |
| OIP5 | BMS-708163        | 0.086477 | 0.027315 | 11339 |
| OIP5 | BMS-754807        | 0.050303 | 0.351869 | 11339 |
| OIP5 | BMS345541         | -0.13715 | 9.26E-05 | 11339 |
| OIP5 | BX-795            | -0.03001 | 0.549769 | 11339 |
| OIP5 | BX-912            | -0.10618 | 0.002617 | 11339 |
| OIP5 | Belinostat        | -0.0764  | 0.040214 | 11339 |
| OIP5 | Bexarotene        | -0.0067  | 0.956133 | 11339 |
| OIP5 | Bicalutamide      | 0.030863 | 0.519045 | 11339 |
| OIP5 | Bleomycin         | 0.092119 | 0.054489 | 11339 |
| OIP5 | Bleomycin (50 uM) | 0.146552 | 3.22E-05 | 11339 |
| OIP5 | Bortezomib        | 0.048388 | 0.571302 | 11339 |
| OIP5 | Bosutinib         | -0.0547  | 0.284176 | 11339 |
| OIP5 | Bryostatins 1     | 0.06704  | 0.170407 | 11339 |
| OIP5 | CAL-101           | -0.04485 | 0.252931 | 11339 |
| OIP5 | CAY10603          | -0.0874  | 0.014769 | 11339 |
| OIP5 | CCT007093         | 0.033442 | 0.472079 | 11339 |
| OIP5 | CCT018159         | -0.00192 | 0.979625 | 11339 |
| OIP5 | CEP-701           | -0.03038 | 0.490197 | 11339 |
| OIP5 | CGP-082996        | -0.01743 | 0.889477 | 11339 |
| OIP5 | CGP-60474         | 0.022073 | 0.836056 | 11339 |
| OIP5 | CH5424802         | -0.01333 | 0.861929 | 11339 |
| OIP5 | CHIR-99021        | 0.134993 | 0.000174 | 11339 |
| OIP5 | CI-1040           | 0.150011 | 0.000118 | 11339 |
| OIP5 | CMK               | 0.050004 | 0.685618 | 11339 |
| OIP5 | CP466722          | -0.10986 | 0.001923 | 11339 |
| OIP5 | CP724714          | 0.015298 | 0.816984 | 11339 |
| OIP5 | CUDC-101          | -0.12704 | 0.000401 | 11339 |
| OIP5 | CX-5461           | -0.05339 | 0.156881 | 11339 |
| OIP5 | Camptothecin      | -0.00633 | 0.912627 | 11339 |
| OIP5 | Cetuximab         | 0.059465 | 0.146758 | 11339 |
| OIP5 | Cisplatin         | 0.033285 | 0.523797 | 11339 |
| OIP5 | Crizotinib        | 0.002461 | 0.992818 | 11339 |
| OIP5 | Cyclopamine       | -0.0153  | 0.915736 | 11339 |
| OIP5 | Cytarabine        | 0.028686 | 0.606827 | 11339 |
| OIP5 | DMOG              | -0.02847 | 0.567457 | 11339 |
| OIP5 | Dabrafenib        | 0.173604 | 3.71E-06 | 11339 |
| OIP5 | Dasatinib         | 0.064641 | 0.346218 | 11339 |
| OIP5 | Docetaxel         | 0.033603 | 0.393815 | 11339 |
| OIP5 | Doxorubicin       | 0.049649 | 0.422216 | 11339 |

|      |                    |          |          |       |
|------|--------------------|----------|----------|-------|
| OIP5 | EHT 1864           | 0.001805 | 0.985214 | 11339 |
| OIP5 | EKB-569            | -0.0825  | 0.034091 | 11339 |
| OIP5 | EX-527             | -0.01785 | 0.888041 | 11339 |
| OIP5 | Elesclomol         | -0.02071 | 0.680574 | 11339 |
| OIP5 | Embelin            | 0.054071 | 0.335576 | 11339 |
| OIP5 | Epothilone B       | -0.01282 | 0.83585  | 11339 |
| OIP5 | Erlotinib          | 0.075445 | 0.302049 | 11339 |
| OIP5 | Etoposide          | -0.03389 | 0.507703 | 11339 |
| OIP5 | FH535              | 0.062394 | 0.176803 | 11339 |
| OIP5 | FK866              | -0.13734 | 0.000104 | 11339 |
| OIP5 | FMK                | 0.061901 | 0.321841 | 11339 |
| OIP5 | FR-180204          | 0.036897 | 0.498234 | 11339 |
| OIP5 | FTI-277            | 0.149547 | 0.000115 | 11339 |
| OIP5 | Foretinib          | -0.03136 | 0.483521 | 11339 |
| OIP5 | GDC0449            | 0.017635 | 0.889536 | 11339 |
| OIP5 | GDC0941            | -0.02985 | 0.630206 | 11339 |
| OIP5 | GNF-2              | -0.01104 | 0.977257 | 11339 |
| OIP5 | GSK-650394         | -0.01838 | 0.840566 | 11339 |
| OIP5 | GSK1070916         | -0.12353 | 0.000578 | 11339 |
| OIP5 | GSK1904529A        | 0.030204 | 0.540441 | 11339 |
| OIP5 | GSK2126458         | -0.07503 | 0.044874 | 11339 |
| OIP5 | GSK269962A         | 0.075452 | 0.095969 | 11339 |
| OIP5 | GSK429286A         | -0.03469 | 0.432811 | 11339 |
| OIP5 | GSK690693          | -0.13304 | 0.000188 | 11339 |
| OIP5 | GW 441756          | -0.01119 | 0.976257 | 11339 |
| OIP5 | GW-2580            | 0.040961 | 0.907972 | 11339 |
| OIP5 | GW843682X          | -0.14268 | 0.055385 | 11339 |
| OIP5 | Gefitinib          | 0.006113 | 0.899058 | 11339 |
| OIP5 | Gemcitabine        | -0.02896 | 0.591886 | 11339 |
| OIP5 | Genentech Cpd 10   | -0.11736 | 0.001055 | 11339 |
| OIP5 | HG-5-113-01        | -0.04549 | 0.547319 | 11339 |
| OIP5 | HG-5-88-01         | 0.047681 | 0.756958 | 11339 |
| OIP5 | HG-6-64-1          | 0.062016 | 0.176954 | 11339 |
| OIP5 | I-BET-762          | -0.10861 | 0.001827 | 11339 |
| OIP5 | IOX2               | 0.040196 | 0.49646  | 11339 |
| OIP5 | IPA-3              | -0.02148 | 0.6237   | 11339 |
| OIP5 | Imatinib           | -0.01014 | 0.964787 | 11339 |
| OIP5 | Ispinesib Mesylate | -0.11658 | 0.001125 | 11339 |
| OIP5 | JNJ-26854165       | 0.056214 | 0.254277 | 11339 |
| OIP5 | JNK Inhibitor VIII | 0.031553 | 0.487168 | 11339 |
| OIP5 | JNK-9L             | 0.034884 | 0.562474 | 11339 |
| OIP5 | JQ1                | 0.019696 | 0.683712 | 11339 |
| OIP5 | JQ12               | 0.008934 | 0.897416 | 11339 |
| OIP5 | JW-7-24-1          | -0.10762 | 0.002369 | 11339 |
| OIP5 | JW-7-52-1          | 0.00131  | 0.993455 | 11339 |
| OIP5 | KIN001-055         | 0.00808  | 0.928642 | 11339 |
| OIP5 | KIN001-102         | -0.12882 | 0.000228 | 11339 |
| OIP5 | KIN001-135         | 0.150716 | 0.07548  | 11339 |
| OIP5 | KIN001-236         | -0.05366 | 0.157698 | 11339 |
| OIP5 | KIN001-244         | -0.0536  | 0.155879 | 11339 |

|      |                    |          |          |       |
|------|--------------------|----------|----------|-------|
| OIP5 | KIN001-260         | -0.06056 | 0.101227 | 11339 |
| OIP5 | KIN001-266         | -0.00902 | 0.876731 | 11339 |
| OIP5 | KIN001-270         | -0.08875 | 0.020115 | 11339 |
| OIP5 | KU-55933           | -0.05502 | 0.336901 | 11339 |
| OIP5 | LAQ824             | -0.08891 | 0.021511 | 11339 |
| OIP5 | LFM-A13            | 0.058729 | 0.230581 | 11339 |
| OIP5 | LY317615           | -0.04489 | 0.314641 | 11339 |
| OIP5 | Lapatinib          | 0.088761 | 0.159982 | 11339 |
| OIP5 | Lenalidomide       | -0.08202 | 0.165533 | 11339 |
| OIP5 | Linifanib          | 0.025754 | 0.660807 | 11339 |
| OIP5 | Lisitinib          | 0.025502 | 0.730919 | 11339 |
| OIP5 | MG-132             | 0.036373 | 0.720305 | 11339 |
| OIP5 | MK-2206            | -0.08856 | 0.060726 | 11339 |
| OIP5 | MLN4924            | 0.076857 | 0.146856 | 11339 |
| OIP5 | MP470              | -0.03302 | 0.468502 | 11339 |
| OIP5 | MPS-1-IN-1         | -0.04356 | 0.266477 | 11339 |
| OIP5 | MS-275             | -0.12809 | 0.075515 | 11339 |
| OIP5 | Masitinib          | -0.04625 | 0.234896 | 11339 |
| OIP5 | Methotrexate       | -0.10595 | 0.003934 | 11339 |
| OIP5 | Midostaurin        | 0.1031   | 0.012427 | 11339 |
| OIP5 | Mitomycin C        | -0.02504 | 0.665518 | 11339 |
| OIP5 | NG-25              | -0.07927 | 0.028389 | 11339 |
| OIP5 | NPK76-II-72-1      | -0.19032 | 2.31E-08 | 11339 |
| OIP5 | NSC-207895         | -0.10953 | 0.006449 | 11339 |
| OIP5 | NSC-87877          | 0.094196 | 0.064113 | 11339 |
| OIP5 | NU-7441            | 0.01099  | 0.915241 | 11339 |
| OIP5 | Navitoclax         | -0.13064 | 0.00035  | 11339 |
| OIP5 | Nilotinib          | -0.03516 | 0.52033  | 11339 |
| OIP5 | Nutlin-3a (-)      | 0.186332 | 2.96E-06 | 11339 |
| OIP5 | OSI-027            | -0.09621 | 0.007366 | 11339 |
| OIP5 | OSI-930            | -0.01349 | 0.7639   | 11339 |
| OIP5 | OSU-03012          | -0.01037 | 0.869075 | 11339 |
| OIP5 | Obatoclax Mesylate | 0.042173 | 0.386325 | 11339 |
| OIP5 | Olaparib           | 0.084959 | 0.040898 | 11339 |
| OIP5 | PAC-1              | -0.01998 | 0.680796 | 11339 |
| OIP5 | PD-0325901         | 0.205085 | 2.87E-08 | 11339 |
| OIP5 | PD-0332991         | 0.089743 | 0.060734 | 11339 |
| OIP5 | PD-173074          | 0.002902 | 0.992679 | 11339 |
| OIP5 | PF-4708671         | 0.05445  | 0.546323 | 11339 |
| OIP5 | PF-562271          | 0.043738 | 0.437783 | 11339 |
| OIP5 | PFI-1              | 0.073159 | 0.102927 | 11339 |
| OIP5 | PHA-665752         | 0.102846 | 0.413395 | 11339 |
| OIP5 | PHA-793887         | -0.11622 | 0.000864 | 11339 |
| OIP5 | PI-103             | -0.07601 | 0.036692 | 11339 |
| OIP5 | PIK-93             | -0.12863 | 0.000224 | 11339 |
| OIP5 | PLX4720            | 0.133918 | 0.000316 | 11339 |
| OIP5 | Paclitaxel         | -0.02748 | 0.838716 | 11339 |
| OIP5 | Parthenolide       | -0.02516 | 0.839241 | 11339 |
| OIP5 | Pazopanib          | 0.064988 | 0.206328 | 11339 |
| OIP5 | Phenformin         | -0.079   | 0.032949 | 11339 |

|      |                     |          |          |       |
|------|---------------------|----------|----------|-------|
| OIP5 | Pyrimethamine       | -0.01374 | 0.926526 | 11339 |
| OIP5 | QL-VIII-58          | 0.045636 | 0.576159 | 11339 |
| OIP5 | QL-X-138            | -0.12101 | 0.00073  | 11339 |
| OIP5 | QL-XI-92            | -0.08311 | 0.021596 | 11339 |
| OIP5 | QL-XII-47           | -0.08635 | 0.02536  | 11339 |
| OIP5 | QL-XII-61           | -0.06913 | 0.29263  | 11339 |
| OIP5 | QS11                | -0.03033 | 0.652928 | 11339 |
| OIP5 | RDEA119             | 0.23575  | 3.91E-12 | 11339 |
| OIP5 | RO-3306             | 0.013596 | 0.774304 | 11339 |
| OIP5 | Rapamycin           | -0.02671 | 0.860326 | 11339 |
| OIP5 | Roscovitine         | 0.053254 | 0.756324 | 11339 |
| OIP5 | Ruxolitinib         | -0.02842 | 0.61758  | 11339 |
| OIP5 | S-Trityl-L-cysteine | -0.06213 | 0.454756 | 11339 |
| OIP5 | SB 216763           | 0.06324  | 0.194493 | 11339 |
| OIP5 | SB 505124           | 0.050673 | 0.473878 | 11339 |
| OIP5 | SB52334             | 0.041088 | 0.400869 | 11339 |
| OIP5 | SB590885            | 0.149957 | 0.000255 | 11339 |
| OIP5 | SGC0946             | 0.061889 | 0.210961 | 11339 |
| OIP5 | SL 0101-1           | 0.068904 | 0.345451 | 11339 |
| OIP5 | SN-38               | 0.073146 | 0.07874  | 11339 |
| OIP5 | SNX-2112            | -0.07811 | 0.032761 | 11339 |
| OIP5 | STF-62247           | -0.03837 | 0.363334 | 11339 |
| OIP5 | Salubrinal          | -0.05066 | 0.571052 | 11339 |
| OIP5 | Saracatinib         | -0.02824 | 0.764819 | 11339 |
| OIP5 | Shikonin            | 0.031066 | 0.590092 | 11339 |
| OIP5 | Sorafenib           | 0.033831 | 0.790956 | 11339 |
| OIP5 | Sunitinib           | -0.02731 | 0.755817 | 11339 |
| OIP5 | T0901317            | -0.08073 | 0.041168 | 11339 |
| OIP5 | TAE684              | 0.033705 | 0.801229 | 11339 |
| OIP5 | TAK-715             | -0.11459 | 0.001294 | 11339 |
| OIP5 | TG101348            | -0.08679 | 0.01537  | 11339 |
| OIP5 | TGX221              | 0.133822 | 0.029196 | 11339 |
| OIP5 | THZ-2-102-1         | -0.13795 | 9.53E-05 | 11339 |
| OIP5 | THZ-2-49            | -0.06811 | 0.067022 | 11339 |
| OIP5 | TL-1-85             | -0.07156 | 0.050303 | 11339 |
| OIP5 | TL-2-105            | -0.07306 | 0.049845 | 11339 |
| OIP5 | TPCA-1              | -0.1109  | 0.001588 | 11339 |
| OIP5 | TW 37               | -0.03651 | 0.453487 | 11339 |
| OIP5 | Talazoparib         | 0.082444 | 0.050364 | 11339 |
| OIP5 | Tamoxifen           | 0.033603 | 0.787996 | 11339 |
| OIP5 | Temozolomide        | 0.032014 | 0.672955 | 11339 |
| OIP5 | Temsirolimus        | -0.02708 | 0.622609 | 11339 |
| OIP5 | Thapsigargin        | 0.010772 | 0.904402 | 11339 |
| OIP5 | Tipifarnib          | 0.029455 | 0.685621 | 11339 |
| OIP5 | Tivozanib           | 0.001261 | 0.987102 | 11339 |
| OIP5 | Trametinib          | 0.277302 | 0        | 11339 |
| OIP5 | Tubastatin A        | -0.05631 | 0.12399  | 11339 |
| OIP5 | UNC0638             | -0.0265  | 0.484549 | 11339 |
| OIP5 | UNC1215             | 0.080887 | 0.0799   | 11339 |
| OIP5 | VNLG/124            | -0.03137 | 0.480957 | 11339 |

|      |                    |          |          |       |
|------|--------------------|----------|----------|-------|
| OIP5 | VX-11e             | 0.110779 | 0.007591 | 11339 |
| OIP5 | VX-680             | -0.06137 | 0.516278 | 11339 |
| OIP5 | VX-702             | -0.05023 | 0.781002 | 11339 |
| OIP5 | Veliparib          | -0.0111  | 0.896633 | 11339 |
| OIP5 | Vinblastine        | -0.06736 | 0.117278 | 11339 |
| OIP5 | Vinorelbine        | -0.04679 | 0.39395  | 11339 |
| OIP5 | Vorinostat         | -0.17307 | 1.37E-06 | 11339 |
| OIP5 | WH-4-023           | 0.069699 | 0.369852 | 11339 |
| OIP5 | WZ-1-84            | 0.022133 | 0.808426 | 11339 |
| OIP5 | WZ3105             | -0.12677 | 0.000298 | 11339 |
| OIP5 | XAV939             | 0.053827 | 0.17405  | 11339 |
| OIP5 | XL-184             | 0.004383 | 0.942639 | 11339 |
| OIP5 | XMD11-85h          | 0.093195 | 0.481812 | 11339 |
| OIP5 | XMD13-2            | -0.11224 | 0.001548 | 11339 |
| OIP5 | XMD14-99           | 0.027762 | 0.500626 | 11339 |
| OIP5 | XMD15-27           | -0.01074 | 0.853428 | 11339 |
| OIP5 | XMD8-85            | 0.049405 | 0.570249 | 11339 |
| OIP5 | XMD8-92            | 0.031061 | 0.798567 | 11339 |
| OIP5 | Y-39983            | -0.06748 | 0.073094 | 11339 |
| OIP5 | YK 4-279           | 0.014412 | 0.831595 | 11339 |
| OIP5 | YM155              | -0.05003 | 0.325564 | 11339 |
| OIP5 | YM201636           | -0.09026 | 0.013095 | 11339 |
| OIP5 | Z-LLN1e-CHO        | 0.041679 | 0.608991 | 11339 |
| OIP5 | ZG-10              | -0.04219 | 0.555294 | 11339 |
| OIP5 | ZM-447439          | -0.0649  | 0.149094 | 11339 |
| OIP5 | ZSTK474            | -0.09626 | 0.007501 | 11339 |
| OIP5 | Zibotentan         | 0.016751 | 0.96343  | 11339 |
| OIP5 | piperlongumine     | 0.069748 | 0.095505 | 11339 |
| OIP5 | rTRAIL             | 0.043122 | 0.555049 | 11339 |
| OIP5 | selumetinib        | 0.246905 | 3.36E-13 | 11339 |
| PLK4 | (5Z)-7-Oxozeaenol  | 0.120223 | 0.001401 | 10733 |
| PLK4 | 17-AAG             | 0.212566 | 2.63E-09 | 10733 |
| PLK4 | 5-Fluorouracil     | -0.17115 | 1.08E-06 | 10733 |
| PLK4 | 681640             | 0.006478 | 0.930495 | 10733 |
| PLK4 | A-443654           | -0.07387 | 0.637899 | 10733 |
| PLK4 | A-770041           | -0.04545 | 0.604231 | 10733 |
| PLK4 | AC220              | -0.05368 | 0.245159 | 10733 |
| PLK4 | AG-014699          | 0.100638 | 0.012872 | 10733 |
| PLK4 | AICAR              | -0.224   | 1.1E-09  | 10733 |
| PLK4 | AKT inhibitor VIII | 0.057326 | 0.200919 | 10733 |
| PLK4 | AMG-706            | 0.078165 | 0.134388 | 10733 |
| PLK4 | AP-24534           | -0.17464 | 2.67E-06 | 10733 |
| PLK4 | AR-42              | -0.23519 | 6.49E-12 | 10733 |
| PLK4 | AS601245           | 0.032226 | 0.578848 | 10733 |
| PLK4 | AS605240           | -0.08039 | 0.04786  | 10733 |
| PLK4 | AT-7519            | -0.28238 | 4.79E-17 | 10733 |
| PLK4 | ATRA               | -0.07796 | 0.08424  | 10733 |
| PLK4 | AUY922             | -0.04885 | 0.343914 | 10733 |
| PLK4 | AZ628              | 0.09177  | 0.199487 | 10733 |
| PLK4 | AZD6482            | -0.03297 | 0.511309 | 10733 |

|      |                   |          |          |       |
|------|-------------------|----------|----------|-------|
| PLK4 | AZD7762           | -0.25486 | 2.57E-12 | 10733 |
| PLK4 | AZD8055           | -0.19651 | 1.19E-07 | 10733 |
| PLK4 | Afatinib          | 0.142108 | 5.62E-05 | 10733 |
| PLK4 | Axitinib          | -0.08985 | 0.051644 | 10733 |
| PLK4 | BAY 61-3606       | -0.14852 | 9.41E-05 | 10733 |
| PLK4 | BEZ235            | -0.00181 | 0.977768 | 10733 |
| PLK4 | BHG712            | -0.22536 | 5.01E-11 | 10733 |
| PLK4 | BI-2536           | -0.20829 | 0.015438 | 10733 |
| PLK4 | BIRB 0796         | 0.10207  | 0.027966 | 10733 |
| PLK4 | BIX02189          | -0.264   | 9.72E-15 | 10733 |
| PLK4 | BMS-509744        | 0.019153 | 0.862352 | 10733 |
| PLK4 | BMS-536924        | 0.018889 | 0.822797 | 10733 |
| PLK4 | BMS-708163        | 0.138464 | 0.000285 | 10733 |
| PLK4 | BMS-754807        | 0.081787 | 0.097188 | 10733 |
| PLK4 | BMS345541         | -0.28533 | 2.48E-17 | 10733 |
| PLK4 | BX-795            | -0.12154 | 0.002736 | 10733 |
| PLK4 | BX-912            | -0.2877  | 7.55E-18 | 10733 |
| PLK4 | Belinostat        | -0.20099 | 1.25E-08 | 10733 |
| PLK4 | Bexarotene        | 0.018482 | 0.843961 | 10733 |
| PLK4 | Bicalutamide      | 0.07912  | 0.061363 | 10733 |
| PLK4 | Bleomycin         | -0.02033 | 0.754806 | 10733 |
| PLK4 | Bleomycin (50 uM) | 0.143073 | 5.03E-05 | 10733 |
| PLK4 | Bortezomib        | -0.0066  | 0.952725 | 10733 |
| PLK4 | Bosutinib         | -0.10056 | 0.024649 | 10733 |
| PLK4 | Bryostatins 1     | 0.104346 | 0.022633 | 10733 |
| PLK4 | CAL-101           | -0.21264 | 1.07E-09 | 10733 |
| PLK4 | CAY10603          | -0.23848 | 2.82E-12 | 10733 |
| PLK4 | CCT007093         | 0.113429 | 0.004716 | 10733 |
| PLK4 | CCT018159         | -0.0025  | 0.974022 | 10733 |
| PLK4 | CEP-701           | -0.18151 | 1.15E-06 | 10733 |
| PLK4 | CGP-082996        | -0.052   | 0.60496  | 10733 |
| PLK4 | CGP-60474         | -0.08128 | 0.317599 | 10733 |
| PLK4 | CH5424802         | -0.09887 | 0.035007 | 10733 |
| PLK4 | CHIR-99021        | 0.094576 | 0.010783 | 10733 |
| PLK4 | CI-1040           | 0.10416  | 0.010055 | 10733 |
| PLK4 | CMK               | -0.08341 | 0.432572 | 10733 |
| PLK4 | CP466722          | -0.28213 | 4.72E-17 | 10733 |
| PLK4 | CP724714          | 0.064016 | 0.19892  | 10733 |
| PLK4 | CUDC-101          | -0.22689 | 6.51E-11 | 10733 |
| PLK4 | CX-5461           | -0.22987 | 2.72E-11 | 10733 |
| PLK4 | Camptothecin      | -0.132   | 0.000804 | 10733 |
| PLK4 | Cetuximab         | 0.150644 | 6.51E-05 | 10733 |
| PLK4 | Cisplatin         | 0.033424 | 0.521717 | 10733 |
| PLK4 | Crizotinib        | -0.10649 | 0.3171   | 10733 |
| PLK4 | Cyclophosphamide  | -0.08538 | 0.38028  | 10733 |
| PLK4 | Cytarabine        | -0.09884 | 0.0262   | 10733 |
| PLK4 | DMOG              | -0.15668 | 5.28E-05 | 10733 |
| PLK4 | Dabrafenib        | 0.122863 | 0.001599 | 10733 |
| PLK4 | Dasatinib         | 0.021796 | 0.776926 | 10733 |
| PLK4 | Docetaxel         | 0.170379 | 2.95E-06 | 10733 |

|      |                    |          |          |       |
|------|--------------------|----------|----------|-------|
| PLK4 | Doxorubicin        | -0.06599 | 0.248597 | 10733 |
| PLK4 | EHT 1864           | 0.059231 | 0.328239 | 10733 |
| PLK4 | EKB-569            | -0.1639  | 8.15E-06 | 10733 |
| PLK4 | EX-527             | 0.024606 | 0.840666 | 10733 |
| PLK4 | Elesclomol         | -0.00026 | 0.995665 | 10733 |
| PLK4 | Embelin            | -0.04787 | 0.407311 | 10733 |
| PLK4 | Epothilone B       | 0.008624 | 0.892274 | 10733 |
| PLK4 | Erlotinib          | 0.202085 | 0.001583 | 10733 |
| PLK4 | Etoposide          | -0.16625 | 3.91E-05 | 10733 |
| PLK4 | FH535              | 0.084622 | 0.052914 | 10733 |
| PLK4 | FK866              | -0.24846 | 4.63E-13 | 10733 |
| PLK4 | FMK                | -0.12646 | 0.012063 | 10733 |
| PLK4 | FR-180204          | -0.07381 | 0.117749 | 10733 |
| PLK4 | FTI-277            | 0.172936 | 6.81E-06 | 10733 |
| PLK4 | Foretinib          | -0.1627  | 8.96E-06 | 10733 |
| PLK4 | GDC0449            | -0.00928 | 0.948573 | 10733 |
| PLK4 | GDC0941            | -0.09957 | 0.029214 | 10733 |
| PLK4 | GNF-2              | -0.05245 | 0.829085 | 10733 |
| PLK4 | GSK-650394         | -0.07657 | 0.212011 | 10733 |
| PLK4 | GSK1070916         | -0.28798 | 2.97E-17 | 10733 |
| PLK4 | GSK1904529A        | 0.097444 | 0.022745 | 10733 |
| PLK4 | GSK2126458         | -0.21502 | 7.19E-10 | 10733 |
| PLK4 | GSK269962A         | -0.00177 | 0.980495 | 10733 |
| PLK4 | GSK429286A         | -0.17493 | 1.8E-06  | 10733 |
| PLK4 | GSK690693          | -0.25068 | 2.62E-13 | 10733 |
| PLK4 | GW 441756          | -0.0071  | 0.989034 | 10733 |
| PLK4 | GW-2580            | 0.020094 | 0.967521 | 10733 |
| PLK4 | GW843682X          | -0.22892 | 0.001699 | 10733 |
| PLK4 | Gefitinib          | 0.149231 | 0.000103 | 10733 |
| PLK4 | Gemcitabine        | -0.14662 | 0.000515 | 10733 |
| PLK4 | Genentech Cpd 10   | -0.25962 | 3.03E-14 | 10733 |
| PLK4 | HG-5-113-01        | -0.12241 | 0.050638 | 10733 |
| PLK4 | HG-5-88-01         | -0.02864 | 0.875654 | 10733 |
| PLK4 | HG-6-64-1          | -0.05142 | 0.280609 | 10733 |
| PLK4 | I-BET-762          | -0.30529 | 3.29E-20 | 10733 |
| PLK4 | IOX2               | 0.072944 | 0.167757 | 10733 |
| PLK4 | IPA-3              | -0.21053 | 7.55E-09 | 10733 |
| PLK4 | Imatinib           | -0.10748 | 0.309363 | 10733 |
| PLK4 | Ispinesib Mesylate | -0.23525 | 7.5E-12  | 10733 |
| PLK4 | JNJ-26854165       | 0.027719 | 0.626294 | 10733 |
| PLK4 | JNK Inhibitor VIII | 0.125006 | 0.001714 | 10733 |
| PLK4 | JNK-9L             | -0.03884 | 0.507984 | 10733 |
| PLK4 | JQ1                | -0.0642  | 0.123685 | 10733 |
| PLK4 | JQ12               | -0.08296 | 0.092197 | 10733 |
| PLK4 | JW-7-24-1          | -0.23539 | 4.55E-12 | 10733 |
| PLK4 | JW-7-52-1          | -0.05328 | 0.61077  | 10733 |
| PLK4 | KIN001-055         | 0.008538 | 0.924731 | 10733 |
| PLK4 | KIN001-102         | -0.29662 | 6.89E-19 | 10733 |
| PLK4 | KIN001-135         | 0.16561  | 0.049515 | 10733 |
| PLK4 | KIN001-236         | -0.21515 | 5.89E-10 | 10733 |

|      |                    |          |          |       |
|------|--------------------|----------|----------|-------|
| PLK4 | KIN001-244         | -0.25067 | 3.17E-13 | 10733 |
| PLK4 | KIN001-260         | -0.20025 | 7.28E-09 | 10733 |
| PLK4 | KIN001-266         | -0.07929 | 0.074995 | 10733 |
| PLK4 | KIN001-270         | -0.17236 | 2.28E-06 | 10733 |
| PLK4 | KU-55933           | -0.12159 | 0.01044  | 10733 |
| PLK4 | LAQ824             | -0.19176 | 1.63E-07 | 10733 |
| PLK4 | LFM-A13            | 0.075798 | 0.109442 | 10733 |
| PLK4 | LY317615           | -0.13965 | 0.000326 | 10733 |
| PLK4 | Lapatinib          | 0.195528 | 0.000806 | 10733 |
| PLK4 | Lenalidomide       | -0.05892 | 0.377518 | 10733 |
| PLK4 | Linifanib          | -0.03968 | 0.456049 | 10733 |
| PLK4 | Lisitinib          | 0.057053 | 0.338518 | 10733 |
| PLK4 | MG-132             | 0.004069 | 0.977186 | 10733 |
| PLK4 | MK-2206            | -0.15313 | 0.000457 | 10733 |
| PLK4 | MLN4924            | 0.057385 | 0.301114 | 10733 |
| PLK4 | MP470              | -0.0804  | 0.055509 | 10733 |
| PLK4 | MPS-1-IN-1         | -0.14158 | 8.55E-05 | 10733 |
| PLK4 | MS-275             | -0.18396 | 0.007411 | 10733 |
| PLK4 | Masitinib          | -0.18347 | 2.07E-07 | 10733 |
| PLK4 | Methotrexate       | -0.27804 | 1.84E-15 | 10733 |
| PLK4 | Midostaurin        | 0.053226 | 0.232022 | 10733 |
| PLK4 | Mitomycin C        | -0.12094 | 0.005323 | 10733 |
| PLK4 | NG-25              | -0.25747 | 2.97E-14 | 10733 |
| PLK4 | NPK76-II-72-1      | -0.36312 | 7.37E-29 | 10733 |
| PLK4 | NSC-207895         | -0.15286 | 9.78E-05 | 10733 |
| PLK4 | NSC-87877          | 0.106177 | 0.034686 | 10733 |
| PLK4 | NU-7441            | -0.06475 | 0.316319 | 10733 |
| PLK4 | Navitoclax         | -0.28852 | 1.49E-16 | 10733 |
| PLK4 | Nilotinib          | -0.13072 | 0.002232 | 10733 |
| PLK4 | Nutlin-3a (-)      | 0.067164 | 0.139935 | 10733 |
| PLK4 | OSI-027            | -0.2194  | 1.97E-10 | 10733 |
| PLK4 | OSI-930            | -0.13572 | 0.000214 | 10733 |
| PLK4 | OSU-03012          | -0.11488 | 0.007616 | 10733 |
| PLK4 | Obatoclax Mesylate | -0.11036 | 0.008349 | 10733 |
| PLK4 | Olaparib           | 0.045618 | 0.303699 | 10733 |
| PLK4 | PAC-1              | -0.22853 | 6.64E-10 | 10733 |
| PLK4 | PD-0325901         | 0.226768 | 6.73E-10 | 10733 |
| PLK4 | PD-0332991         | -0.02315 | 0.720325 | 10733 |
| PLK4 | PD-173074          | -0.00663 | 0.982618 | 10733 |
| PLK4 | PF-4708671         | 0.054726 | 0.545355 | 10733 |
| PLK4 | PF-562271          | 0.046881 | 0.399507 | 10733 |
| PLK4 | PFI-1              | -0.00795 | 0.89749  | 10733 |
| PLK4 | PHA-665752         | 0.043229 | 0.780391 | 10733 |
| PLK4 | PHA-793887         | -0.28799 | 5.67E-18 | 10733 |
| PLK4 | PI-103             | -0.24162 | 1.79E-12 | 10733 |
| PLK4 | PIK-93             | -0.33068 | 1.15E-23 | 10733 |
| PLK4 | PLX4720            | 0.137265 | 0.000211 | 10733 |
| PLK4 | Paclitaxel         | -0.07638 | 0.454517 | 10733 |
| PLK4 | Parthenolide       | -0.12067 | 0.186583 | 10733 |
| PLK4 | Pazopanib          | 0.062141 | 0.231156 | 10733 |



|      |                     |          |          |       |
|------|---------------------|----------|----------|-------|
| PLK4 | Phenformin          | -0.16568 | 3.38E-06 | 10733 |
| PLK4 | Pyrimethamine       | -0.05424 | 0.645324 | 10733 |
| PLK4 | QL-VIII-58          | -0.02363 | 0.801362 | 10733 |
| PLK4 | QL-X-138            | -0.24342 | 1.53E-12 | 10733 |
| PLK4 | QL-XI-92            | -0.25567 | 5.75E-14 | 10733 |
| PLK4 | QL-XII-47           | -0.16229 | 1.04E-05 | 10733 |
| PLK4 | QL-XII-61           | -0.19467 | 0.000424 | 10733 |
| PLK4 | QS11                | -0.10411 | 0.049442 | 10733 |
| PLK4 | RDEA119             | 0.233497 | 6.35E-12 | 10733 |
| PLK4 | RO-3306             | 0.099574 | 0.014201 | 10733 |
| PLK4 | Rapamycin           | -0.10657 | 0.285452 | 10733 |
| PLK4 | Roscovitine         | 0.027601 | 0.896026 | 10733 |
| PLK4 | Ruxolitinib         | -0.08274 | 0.065262 | 10733 |
| PLK4 | S-Trityl-L-cysteine | -0.1699  | 0.015543 | 10733 |
| PLK4 | SB 216763           | 0.084236 | 0.075124 | 10733 |
| PLK4 | SB 505124           | 0.054361 | 0.435165 | 10733 |
| PLK4 | SB52334             | 0.012435 | 0.836164 | 10733 |
| PLK4 | SB590885            | 0.155592 | 0.000131 | 10733 |
| PLK4 | SGC0946             | 0.084936 | 0.064687 | 10733 |
| PLK4 | SL 0101-1           | 0.061753 | 0.400464 | 10733 |
| PLK4 | SN-38               | -0.06536 | 0.123305 | 10733 |
| PLK4 | SNX-2112            | -0.27861 | 2.25E-16 | 10733 |
| PLK4 | STF-62247           | -0.1751  | 2.4E-06  | 10733 |
| PLK4 | Salubrinal          | -0.11719 | 0.128927 | 10733 |
| PLK4 | Saracatinib         | -0.00852 | 0.936506 | 10733 |
| PLK4 | Shikonin            | -0.09371 | 0.043967 | 10733 |
| PLK4 | Sorafenib           | -0.02707 | 0.835504 | 10733 |
| PLK4 | Sunitinib           | -0.14408 | 0.026756 | 10733 |
| PLK4 | T0901317            | -0.17736 | 1.42E-06 | 10733 |
| PLK4 | TAE684              | -0.0092  | 0.956447 | 10733 |
| PLK4 | TAK-715             | -0.23838 | 4.15E-12 | 10733 |
| PLK4 | TG101348            | -0.25683 | 3.07E-14 | 10733 |
| PLK4 | TGX221              | 0.130879 | 0.033547 | 10733 |
| PLK4 | THZ-2-102-1         | -0.27313 | 1.21E-15 | 10733 |
| PLK4 | THZ-2-49            | -0.21659 | 5.62E-10 | 10733 |
| PLK4 | TL-1-85             | -0.24266 | 1.07E-12 | 10733 |
| PLK4 | TL-2-105            | -0.204   | 5.42E-09 | 10733 |
| PLK4 | TPCA-1              | -0.2922  | 2.05E-18 | 10733 |
| PLK4 | TW 37               | -0.03156 | 0.528366 | 10733 |
| PLK4 | Talazoparib         | -0.00191 | 0.973504 | 10733 |
| PLK4 | Tamoxifen           | 0.001792 | 0.993474 | 10733 |
| PLK4 | Temozolomide        | -0.02805 | 0.719372 | 10733 |
| PLK4 | Temsirolimus        | -0.10493 | 0.013949 | 10733 |
| PLK4 | Thapsigargin        | -0.00833 | 0.926096 | 10733 |
| PLK4 | Tipifarnib          | -0.03872 | 0.569552 | 10733 |
| PLK4 | Tivozanib           | -0.08333 | 0.085064 | 10733 |
| PLK4 | Trametinib          | 0.280172 | 0        | 10733 |
| PLK4 | Tubastatin A        | -0.23677 | 3.57E-12 | 10733 |
| PLK4 | UNC0638             | -0.16703 | 8.75E-07 | 10733 |
| PLK4 | UNC1215             | 0.134677 | 0.002384 | 10733 |

|       |                    |          |          |       |
|-------|--------------------|----------|----------|-------|
| PLK4  | VNLG/124           | -0.09157 | 0.019387 | 10733 |
| PLK4  | VX-11e             | 0.023189 | 0.670934 | 10733 |
| PLK4  | VX-680             | -0.18217 | 0.014376 | 10733 |
| PLK4  | VX-702             | -0.01993 | 0.939314 | 10733 |
| PLK4  | Veliparib          | 0.044751 | 0.512902 | 10733 |
| PLK4  | Vinblastine        | -0.12369 | 0.002026 | 10733 |
| PLK4  | Vinorelbine        | -0.11407 | 0.014521 | 10733 |
| PLK4  | Vorinostat         | -0.28147 | 8.4E-16  | 10733 |
| PLK4  | WH-4-023           | 0.055171 | 0.495354 | 10733 |
| PLK4  | WZ-1-84            | 0.082072 | 0.281438 | 10733 |
| PLK4  | WZ3105             | -0.27134 | 8.34E-16 | 10733 |
| PLK4  | XAV939             | 0.085748 | 0.025367 | 10733 |
| PLK4  | XL-184             | -0.09819 | 0.018248 | 10733 |
| PLK4  | XMD11-85h          | -0.03371 | 0.85892  | 10733 |
| PLK4  | XMD13-2            | -0.23977 | 1.88E-12 | 10733 |
| PLK4  | XMD14-99           | -0.14221 | 8.35E-05 | 10733 |
| PLK4  | XMD15-27           | -0.12651 | 0.001814 | 10733 |
| PLK4  | XMD8-85            | -0.06681 | 0.419305 | 10733 |
| PLK4  | XMD8-92            | -0.0626  | 0.551204 | 10733 |
| PLK4  | Y-39983            | -0.25528 | 1.45E-13 | 10733 |
| PLK4  | YK 4-279           | -0.00342 | 0.965391 | 10733 |
| PLK4  | YM155              | -0.10944 | 0.012394 | 10733 |
| PLK4  | YM201636           | -0.2404  | 2.92E-12 | 10733 |
| PLK4  | Z-LLN1e-CHO        | -0.10271 | 0.13794  | 10733 |
| PLK4  | ZG-10              | -0.14627 | 0.01099  | 10733 |
| PLK4  | ZM-447439          | -0.16745 | 3E-05    | 10733 |
| PLK4  | ZSTK474            | -0.2579  | 4.09E-14 | 10733 |
| PLK4  | Zibotentan         | -0.00785 | 0.987731 | 10733 |
| PLK4  | piperlongumine     | 0.025387 | 0.601259 | 10733 |
| PLK4  | rTRAIL             | 0.038166 | 0.612319 | 10733 |
| PLK4  | selumetinib        | 0.243104 | 8.16E-13 | 10733 |
| RAD51 | (5Z)-7-Oxozeaenol  | 0.132468 | 0.000378 | 5888  |
| RAD51 | 17-AAG             | 0.148426 | 4.38E-05 | 5888  |
| RAD51 | 5-Fluorouracil     | -0.1299  | 0.000263 | 5888  |
| RAD51 | 681640             | -0.03252 | 0.610518 | 5888  |
| RAD51 | A-443654           | -0.03528 | 0.864752 | 5888  |
| RAD51 | A-770041           | -0.03111 | 0.742687 | 5888  |
| RAD51 | AC220              | -0.05603 | 0.221487 | 5888  |
| RAD51 | AG-014699          | 0.091444 | 0.025021 | 5888  |
| RAD51 | AICAR              | -0.22194 | 1.57E-09 | 5888  |
| RAD51 | AKT inhibitor VIII | 0.063848 | 0.148698 | 5888  |
| RAD51 | AMG-706            | 0.041345 | 0.502945 | 5888  |
| RAD51 | AP-24534           | -0.10757 | 0.005612 | 5888  |
| RAD51 | AR-42              | -0.1648  | 2.27E-06 | 5888  |
| RAD51 | AS601245           | 0.068723 | 0.170718 | 5888  |
| RAD51 | AS605240           | -0.0449  | 0.308547 | 5888  |
| RAD51 | AT-7519            | -0.21159 | 6.58E-10 | 5888  |
| RAD51 | ATRA               | -0.13372 | 0.001228 | 5888  |
| RAD51 | AUY922             | 0.030326 | 0.598416 | 5888  |
| RAD51 | AZ628              | 0.09252  | 0.1955   | 5888  |

|       |                   |          |          |      |
|-------|-------------------|----------|----------|------|
| RAD51 | AZD6482           | 0.007257 | 0.90731  | 5888 |
| RAD51 | AZD7762           | -0.20691 | 2.22E-08 | 5888 |
| RAD51 | AZD8055           | -0.16475 | 1.11E-05 | 5888 |
| RAD51 | Afatinib          | 0.017807 | 0.667506 | 5888 |
| RAD51 | Axitinib          | -0.11889 | 0.007295 | 5888 |
| RAD51 | BAY 61-3606       | -0.03206 | 0.463646 | 5888 |
| RAD51 | BEZ235            | 0.033539 | 0.519012 | 5888 |
| RAD51 | BHG712            | -0.15952 | 4.95E-06 | 5888 |
| RAD51 | BI-2536           | -0.11934 | 0.18157  | 5888 |
| RAD51 | BIRB 0796         | 0.074996 | 0.121067 | 5888 |
| RAD51 | BIX02189          | -0.17016 | 1.16E-06 | 5888 |
| RAD51 | BMS-509744        | 0.04168  | 0.672272 | 5888 |
| RAD51 | BMS-536924        | -0.00098 | 0.991699 | 5888 |
| RAD51 | BMS-708163        | 0.072163 | 0.068377 | 5888 |
| RAD51 | BMS-754807        | 0.064796 | 0.208516 | 5888 |
| RAD51 | BMS345541         | -0.22681 | 3.42E-11 | 5888 |
| RAD51 | BX-795            | -0.10387 | 0.012023 | 5888 |
| RAD51 | BX-912            | -0.20941 | 8.24E-10 | 5888 |
| RAD51 | Belinostat        | -0.12425 | 0.000605 | 5888 |
| RAD51 | Bexarotene        | 0.007203 | 0.952291 | 5888 |
| RAD51 | Bicalutamide      | 0.059794 | 0.171487 | 5888 |
| RAD51 | Bleomycin         | 0.078208 | 0.114918 | 5888 |
| RAD51 | Bleomycin (50 uM) | 0.181611 | 1.97E-07 | 5888 |
| RAD51 | Bortezomib        | 0.048549 | 0.569832 | 5888 |
| RAD51 | Bosutinib         | -0.10584 | 0.016961 | 5888 |
| RAD51 | Bryostatins 1     | 0.073432 | 0.126198 | 5888 |
| RAD51 | CAL-101           | -0.12902 | 0.000352 | 5888 |
| RAD51 | CAY10603          | -0.15277 | 1.21E-05 | 5888 |
| RAD51 | CCT007093         | 0.038678 | 0.396239 | 5888 |
| RAD51 | CCT018159         | -0.00582 | 0.935485 | 5888 |
| RAD51 | CEP-701           | -0.14182 | 0.000195 | 5888 |
| RAD51 | CGP-082996        | -0.04276 | 0.682769 | 5888 |
| RAD51 | CGP-60474         | 0.034118 | 0.726717 | 5888 |
| RAD51 | CH5424802         | -0.05909 | 0.2697   | 5888 |
| RAD51 | CHIR-99021        | 0.102253 | 0.005495 | 5888 |
| RAD51 | CI-1040           | 0.067159 | 0.116778 | 5888 |
| RAD51 | CMK               | -0.02262 | 0.87513  | 5888 |
| RAD51 | CP466722          | -0.20341 | 3.01E-09 | 5888 |
| RAD51 | CP724714          | -0.02606 | 0.669863 | 5888 |
| RAD51 | CUDC-101          | -0.17663 | 5.45E-07 | 5888 |
| RAD51 | CX-5461           | -0.15018 | 2.14E-05 | 5888 |
| RAD51 | Camptothecin      | -0.06248 | 0.1482   | 5888 |
| RAD51 | Cetuximab         | 0.07258  | 0.071164 | 5888 |
| RAD51 | Cisplatin         | 0.0521   | 0.290262 | 5888 |
| RAD51 | Crizotinib        | -0.06396 | 0.644904 | 5888 |
| RAD51 | Cyclopamine       | -0.0512  | 0.650581 | 5888 |
| RAD51 | Cytarabine        | -0.03533 | 0.510435 | 5888 |
| RAD51 | DMOG              | -0.05104 | 0.26008  | 5888 |
| RAD51 | Dabrafenib        | 0.140349 | 0.000258 | 5888 |
| RAD51 | Dasatinib         | 0.041561 | 0.564423 | 5888 |

|       |                    |          |          |      |
|-------|--------------------|----------|----------|------|
| RAD51 | Docetaxel          | 0.093473 | 0.012289 | 5888 |
| RAD51 | Doxorubicin        | 0.033022 | 0.629628 | 5888 |
| RAD51 | EHT 1864           | -0.01357 | 0.879546 | 5888 |
| RAD51 | EKB-569            | -0.19185 | 1.2E-07  | 5888 |
| RAD51 | EX-527             | 0.015716 | 0.90505  | 5888 |
| RAD51 | Elesclomol         | 0.006712 | 0.90162  | 5888 |
| RAD51 | Embelin            | 0.025394 | 0.709407 | 5888 |
| RAD51 | Epothilone B       | 0.018802 | 0.749421 | 5888 |
| RAD51 | Erlotinib          | 0.102558 | 0.14947  | 5888 |
| RAD51 | Etoposide          | -0.04313 | 0.375595 | 5888 |
| RAD51 | FH535              | 0.095083 | 0.026813 | 5888 |
| RAD51 | FK866              | -0.1466  | 3.24E-05 | 5888 |
| RAD51 | FMK                | -0.00883 | 0.921523 | 5888 |
| RAD51 | FR-180204          | -0.05743 | 0.246113 | 5888 |
| RAD51 | FTI-277            | 0.16788  | 1.31E-05 | 5888 |
| RAD51 | Foretinib          | -0.09346 | 0.015686 | 5888 |
| RAD51 | GDC0449            | -0.01585 | 0.90393  | 5888 |
| RAD51 | GDC0941            | -0.06019 | 0.243718 | 5888 |
| RAD51 | GNF-2              | -0.09491 | 0.604754 | 5888 |
| RAD51 | GSK-650394         | -0.01492 | 0.876887 | 5888 |
| RAD51 | GSK1070916         | -0.22926 | 3.47E-11 | 5888 |
| RAD51 | GSK1904529A        | 0.0797   | 0.067733 | 5888 |
| RAD51 | GSK2126458         | -0.15581 | 1.24E-05 | 5888 |
| RAD51 | GSK269962A         | 0.047294 | 0.353757 | 5888 |
| RAD51 | GSK429286A         | -0.08659 | 0.027588 | 5888 |
| RAD51 | GSK690693          | -0.19321 | 2.88E-08 | 5888 |
| RAD51 | GW 441756          | -0.01885 | 0.947563 | 5888 |
| RAD51 | GW-2580            | 0.04457  | 0.888023 | 5888 |
| RAD51 | GW843682X          | -0.15169 | 0.0396   | 5888 |
| RAD51 | Gefitinib          | 0.034628 | 0.424675 | 5888 |
| RAD51 | Gemcitabine        | -0.04211 | 0.405594 | 5888 |
| RAD51 | Genentech Cpd 10   | -0.1863  | 8.64E-08 | 5888 |
| RAD51 | HG-5-113-01        | -0.08288 | 0.215811 | 5888 |
| RAD51 | HG-5-88-01         | -0.03077 | 0.867689 | 5888 |
| RAD51 | HG-6-64-1          | 0.007625 | 0.901778 | 5888 |
| RAD51 | I-BET-762          | -0.23295 | 5.11E-12 | 5888 |
| RAD51 | IOX2               | 0.071169 | 0.180294 | 5888 |
| RAD51 | IPA-3              | -0.10519 | 0.005784 | 5888 |
| RAD51 | Imatinib           | -0.12196 | 0.20875  | 5888 |
| RAD51 | Ispinesib Mesylate | -0.16907 | 1.36E-06 | 5888 |
| RAD51 | JNJ-26854165       | 0.046585 | 0.360377 | 5888 |
| RAD51 | JNK Inhibitor VIII | 0.064878 | 0.124973 | 5888 |
| RAD51 | JNK-9L             | 0.000242 | 0.998097 | 5888 |
| RAD51 | JQ1                | -0.08176 | 0.044309 | 5888 |
| RAD51 | JQ12               | -0.0399  | 0.475546 | 5888 |
| RAD51 | JW-7-24-1          | -0.17486 | 4.3E-07  | 5888 |
| RAD51 | JW-7-52-1          | -0.03354 | 0.773804 | 5888 |
| RAD51 | KIN001-055         | -0.00747 | 0.935319 | 5888 |
| RAD51 | KIN001-102         | -0.22563 | 3.53E-11 | 5888 |
| RAD51 | KIN001-135         | 0.129967 | 0.134889 | 5888 |

|       |                    |          |          |      |
|-------|--------------------|----------|----------|------|
| RAD51 | KIN001-236         | -0.15797 | 8.03E-06 | 5888 |
| RAD51 | KIN001-244         | -0.15203 | 1.74E-05 | 5888 |
| RAD51 | KIN001-260         | -0.13777 | 9.64E-05 | 5888 |
| RAD51 | KIN001-266         | -0.05392 | 0.250899 | 5888 |
| RAD51 | KIN001-270         | -0.09508 | 0.012321 | 5888 |
| RAD51 | KU-55933           | -0.08644 | 0.090252 | 5888 |
| RAD51 | LAQ824             | -0.13986 | 0.000183 | 5888 |
| RAD51 | LFM-A13            | 0.086228 | 0.064215 | 5888 |
| RAD51 | LY317615           | -0.13133 | 0.000807 | 5888 |
| RAD51 | Lapatinib          | 0.081947 | 0.197635 | 5888 |
| RAD51 | Lenalidomide       | -0.11245 | 0.032663 | 5888 |
| RAD51 | Linifanib          | -0.03431 | 0.533389 | 5888 |
| RAD51 | Lisitinib          | 0.032781 | 0.635984 | 5888 |
| RAD51 | MG-132             | 0.060046 | 0.507676 | 5888 |
| RAD51 | MK-2206            | -0.13314 | 0.002896 | 5888 |
| RAD51 | MLN4924            | 0.072462 | 0.17532  | 5888 |
| RAD51 | MP470              | -0.07334 | 0.082259 | 5888 |
| RAD51 | MPS-1-IN-1         | -0.10691 | 0.003531 | 5888 |
| RAD51 | MS-275             | -0.18131 | 0.008536 | 5888 |
| RAD51 | Masitinib          | -0.16404 | 4.05E-06 | 5888 |
| RAD51 | Methotrexate       | -0.22522 | 1.98E-10 | 5888 |
| RAD51 | Midostaurin        | 0.080234 | 0.058281 | 5888 |
| RAD51 | Mitomycin C        | -0.04402 | 0.396407 | 5888 |
| RAD51 | NG-25              | -0.19618 | 1.19E-08 | 5888 |
| RAD51 | NPK76-II-72-1      | -0.27688 | 1.07E-16 | 5888 |
| RAD51 | NSC-207895         | -0.09945 | 0.014606 | 5888 |
| RAD51 | NSC-87877          | 0.101264 | 0.044829 | 5888 |
| RAD51 | NU-7441            | -0.02507 | 0.767069 | 5888 |
| RAD51 | Navitoclax         | -0.22781 | 1.33E-10 | 5888 |
| RAD51 | Nilotinib          | -0.141   | 0.00086  | 5888 |
| RAD51 | Nutlin-3a (-)      | 0.072269 | 0.108186 | 5888 |
| RAD51 | OSI-027            | -0.13472 | 0.000138 | 5888 |
| RAD51 | OSI-930            | -0.10509 | 0.004882 | 5888 |
| RAD51 | OSU-03012          | -0.05164 | 0.292446 | 5888 |
| RAD51 | Obatoclax Mesylate | -0.02003 | 0.714459 | 5888 |
| RAD51 | Olaparib           | 0.104435 | 0.010492 | 5888 |
| RAD51 | PAC-1              | -0.12412 | 0.001498 | 5888 |
| RAD51 | PD-0325901         | 0.163131 | 1.32E-05 | 5888 |
| RAD51 | PD-0332991         | -0.02838 | 0.647788 | 5888 |
| RAD51 | PD-173074          | -0.02768 | 0.871207 | 5888 |
| RAD51 | PF-4708671         | 0.019672 | 0.882403 | 5888 |
| RAD51 | PF-562271          | 0.032034 | 0.595656 | 5888 |
| RAD51 | PFI-1              | -0.00651 | 0.916342 | 5888 |
| RAD51 | PHA-665752         | 0.068316 | 0.628361 | 5888 |
| RAD51 | PHA-793887         | -0.20398 | 2.06E-09 | 5888 |
| RAD51 | PI-103             | -0.13537 | 0.000127 | 5888 |
| RAD51 | PIK-93             | -0.24136 | 9.14E-13 | 5888 |
| RAD51 | PLX4720            | 0.127279 | 0.000664 | 5888 |
| RAD51 | Paclitaxel         | -0.03204 | 0.805677 | 5888 |
| RAD51 | Parthenolide       | -0.05325 | 0.619122 | 5888 |

|       |                     |          |          |      |
|-------|---------------------|----------|----------|------|
| RAD51 | Pazopanib           | 0.089722 | 0.063253 | 5888 |
| RAD51 | Phenformin          | -0.12822 | 0.000382 | 5888 |
| RAD51 | Pyrimethamine       | -0.06297 | 0.586723 | 5888 |
| RAD51 | QL-VIII-58          | 0.035657 | 0.674851 | 5888 |
| RAD51 | QL-X-138            | -0.16249 | 4E-06    | 5888 |
| RAD51 | QL-XI-92            | -0.18074 | 1.97E-07 | 5888 |
| RAD51 | QL-XII-47           | -0.10698 | 0.004853 | 5888 |
| RAD51 | QL-XII-61           | -0.125   | 0.033782 | 5888 |
| RAD51 | QS11                | -0.05354 | 0.371718 | 5888 |
| RAD51 | RDEA119             | 0.175183 | 3.98E-07 | 5888 |
| RAD51 | RO-3306             | 0.071465 | 0.086158 | 5888 |
| RAD51 | Rapamycin           | -0.03361 | 0.813116 | 5888 |
| RAD51 | Roscovitine         | 0.089971 | 0.552846 | 5888 |
| RAD51 | Ruxolitinib         | -0.04811 | 0.337993 | 5888 |
| RAD51 | S-Trityl-L-cysteine | -0.11037 | 0.136544 | 5888 |
| RAD51 | SB 216763           | 0.057497 | 0.244077 | 5888 |
| RAD51 | SB 505124           | 0.03103  | 0.701542 | 5888 |
| RAD51 | SB52334             | 0.055598 | 0.224676 | 5888 |
| RAD51 | SB590885            | 0.137873 | 0.000958 | 5888 |
| RAD51 | SGC0946             | 0.108573 | 0.014486 | 5888 |
| RAD51 | SL 0101-1           | 0.051621 | 0.488917 | 5888 |
| RAD51 | SN-38               | 0.024165 | 0.625172 | 5888 |
| RAD51 | SNX-2112            | -0.1641  | 2.82E-06 | 5888 |
| RAD51 | STF-62247           | -0.0997  | 0.010082 | 5888 |
| RAD51 | Salubrinal          | -0.0904  | 0.261185 | 5888 |
| RAD51 | Saracatinib         | -0.04845 | 0.581468 | 5888 |
| RAD51 | Shikonin            | -0.05479 | 0.287687 | 5888 |
| RAD51 | Sorafenib           | -0.04037 | 0.744451 | 5888 |
| RAD51 | Sunitinib           | -0.10962 | 0.109004 | 5888 |
| RAD51 | T0901317            | -0.11013 | 0.00416  | 5888 |
| RAD51 | TAE684              | 0.015484 | 0.922325 | 5888 |
| RAD51 | TAK-715             | -0.18383 | 1.3E-07  | 5888 |
| RAD51 | TG101348            | -0.21082 | 7.12E-10 | 5888 |
| RAD51 | TGX221              | 0.167174 | 0.00519  | 5888 |
| RAD51 | THZ-2-102-1         | -0.22058 | 1.66E-10 | 5888 |
| RAD51 | THZ-2-49            | -0.13813 | 0.000114 | 5888 |
| RAD51 | TL-1-85             | -0.19606 | 1.31E-08 | 5888 |
| RAD51 | TL-2-105            | -0.14436 | 5.33E-05 | 5888 |
| RAD51 | TPCA-1              | -0.22177 | 6.58E-11 | 5888 |
| RAD51 | TW 37               | -0.02169 | 0.681251 | 5888 |
| RAD51 | Talazoparib         | 0.101003 | 0.013463 | 5888 |
| RAD51 | Tamoxifen           | 0.0045   | 0.978961 | 5888 |
| RAD51 | Temozolomide        | 0.022935 | 0.781401 | 5888 |
| RAD51 | Temsirolimus        | -0.04605 | 0.358811 | 5888 |
| RAD51 | Thapsigargin        | 0.015243 | 0.857043 | 5888 |
| RAD51 | Tipifarnib          | 0.012242 | 0.889165 | 5888 |
| RAD51 | Tivozanib           | -0.05525 | 0.30951  | 5888 |
| RAD51 | Trametinib          | 0.231586 | 2.63E-11 | 5888 |
| RAD51 | Tubastatin A        | -0.15318 | 1.09E-05 | 5888 |
| RAD51 | UNC0638             | -0.12899 | 0.00018  | 5888 |

|       |                    |          |          |        |
|-------|--------------------|----------|----------|--------|
| RAD51 | UNC1215            | 0.113382 | 0.010822 | 5888   |
| RAD51 | VNLG/124           | -0.10086 | 0.009313 | 5888   |
| RAD51 | VX-11e             | 0.020933 | 0.70393  | 5888   |
| RAD51 | VX-680             | -0.11357 | 0.170316 | 5888   |
| RAD51 | VX-702             | -0.03516 | 0.883641 | 5888   |
| RAD51 | Veliparib          | -0.00158 | 0.986855 | 5888   |
| RAD51 | Vinblastine        | -0.12496 | 0.001805 | 5888   |
| RAD51 | Vinorelbine        | -0.06441 | 0.20948  | 5888   |
| RAD51 | Vorinostat         | -0.25421 | 5.03E-13 | 5888   |
| RAD51 | WH-4-023           | 0.027967 | 0.757692 | 5888   |
| RAD51 | WZ-1-84            | 0.032237 | 0.712454 | 5888   |
| RAD51 | WZ3105             | -0.22686 | 2.7E-11  | 5888   |
| RAD51 | XAV939             | 0.084766 | 0.027162 | 5888   |
| RAD51 | XL-184             | -0.0628  | 0.161824 | 5888   |
| RAD51 | XMD11-85h          | 0.036729 | 0.847526 | 5888   |
| RAD51 | XMD13-2            | -0.18155 | 1.51E-07 | 5888   |
| RAD51 | XMD14-99           | -0.07269 | 0.054395 | 5888   |
| RAD51 | XMD15-27           | -0.09017 | 0.034482 | 5888   |
| RAD51 | XMD8-85            | -0.0294  | 0.762014 | 5888   |
| RAD51 | XMD8-92            | -0.02044 | 0.88257  | 5888   |
| RAD51 | Y-39983            | -0.16187 | 5.06E-06 | 5888   |
| RAD51 | YK 4-279           | -0.01338 | 0.844447 | 5888   |
| RAD51 | YM155              | -0.03614 | 0.507832 | 5888   |
| RAD51 | YM201636           | -0.1449  | 4.27E-05 | 5888   |
| RAD51 | Z-LLN1e-CHO        | -0.01649 | 0.856486 | 5888   |
| RAD51 | ZG-10              | -0.11356 | 0.057888 | 5888   |
| RAD51 | ZM-447439          | -0.17    | 2.21E-05 | 5888   |
| RAD51 | ZSTK474            | -0.1742  | 6.16E-07 | 5888   |
| RAD51 | Zibotentan         | 0.001809 | 0.996163 | 5888   |
| RAD51 | piperlongumine     | 0.071366 | 0.086788 | 5888   |
| RAD51 | rTRAIL             | 0.030177 | 0.70773  | 5888   |
| RAD51 | selumetinib        | 0.198965 | 7.11E-09 | 5888   |
| RTKN2 | (5Z)-7-oxozeaenol  | 0.193435 | 7.62E-08 | 219790 |
| RTKN2 | 17-AAG             | 0.172436 | 1.74E-06 | 219790 |
| RTKN2 | 5-Fluorouracil     | 0.037738 | 0.3255   | 219790 |
| RTKN2 | 681640             | 0.023431 | 0.724326 | 219790 |
| RTKN2 | A-443654           | -0.01459 | 0.954968 | 219790 |
| RTKN2 | A-770041           | 0.006643 | 0.952131 | 219790 |
| RTKN2 | AC220              | 0.043175 | 0.373501 | 219790 |
| RTKN2 | AG-014699          | 0.014701 | 0.765685 | 219790 |
| RTKN2 | AICAR              | -0.02127 | 0.629817 | 219790 |
| RTKN2 | AKT inhibitor VIII | -0.03337 | 0.490336 | 219790 |
| RTKN2 | AMG-706            | 0.079389 | 0.127122 | 219790 |
| RTKN2 | AP-24534           | 0.06083  | 0.140306 | 219790 |
| RTKN2 | AR-42              | -0.06944 | 0.055781 | 219790 |
| RTKN2 | AS601245           | 0.044549 | 0.41381  | 219790 |
| RTKN2 | AS605240           | 0.032777 | 0.476979 | 219790 |
| RTKN2 | AT-7519            | -0.05833 | 0.110756 | 219790 |
| RTKN2 | ATRA               | 0.059558 | 0.210004 | 219790 |
| RTKN2 | AUY922             | 0.09277  | 0.041259 | 219790 |

|       |                   |          |          |        |
|-------|-------------------|----------|----------|--------|
| RTKN2 | AZ628             | 0.196636 | 0.001605 | 219790 |
| RTKN2 | AZD6482           | 0.038492 | 0.426698 | 219790 |
| RTKN2 | AZD7762           | 0.037448 | 0.380631 | 219790 |
| RTKN2 | AZD8055           | 0.066713 | 0.093339 | 219790 |
| RTKN2 | Afatinib          | 0.027179 | 0.496806 | 219790 |
| RTKN2 | Axitinib          | 0.064154 | 0.194654 | 219790 |
| RTKN2 | BAY 61-3606       | 0.021342 | 0.638434 | 219790 |
| RTKN2 | BEZ235            | 0.113758 | 0.007351 | 219790 |
| RTKN2 | BHG712            | 0.035916 | 0.34891  | 219790 |
| RTKN2 | BI-2536           | -0.0501  | 0.65126  | 219790 |
| RTKN2 | BIRB 0796         | 0.046848 | 0.365426 | 219790 |
| RTKN2 | BIX02189          | 0.013515 | 0.74336  | 219790 |
| RTKN2 | BMS-509744        | -0.02372 | 0.827079 | 219790 |
| RTKN2 | BMS-536924        | 0.028196 | 0.716304 | 219790 |
| RTKN2 | BMS-708163        | -0.015   | 0.742167 | 219790 |
| RTKN2 | BMS-754807        | -0.05949 | 0.25533  | 219790 |
| RTKN2 | BMS345541         | -0.05234 | 0.15712  | 219790 |
| RTKN2 | BX-795            | 0.038111 | 0.4294   | 219790 |
| RTKN2 | BX-912            | -0.07398 | 0.039431 | 219790 |
| RTKN2 | Belinostat        | -0.07074 | 0.058781 | 219790 |
| RTKN2 | Bexarotene        | 0.109678 | 0.032741 | 219790 |
| RTKN2 | Bicalutamide      | 0.002955 | 0.959079 | 219790 |
| RTKN2 | Bleomycin         | 0.071938 | 0.154048 | 219790 |
| RTKN2 | Bleomycin (50 uM) | 0.137493 | 0.000101 | 219790 |
| RTKN2 | Bortezomib        | 0.145258 | 0.02949  | 219790 |
| RTKN2 | Bosutinib         | 0.08188  | 0.079088 | 219790 |
| RTKN2 | Bryostatine 1     | 0.053218 | 0.296792 | 219790 |
| RTKN2 | CAL-101           | -0.00869 | 0.843933 | 219790 |
| RTKN2 | CAY10603          | -0.05243 | 0.155059 | 219790 |
| RTKN2 | CCT007093         | 0.028504 | 0.548137 | 219790 |
| RTKN2 | CCT018159         | 0.124798 | 0.004499 | 219790 |
| RTKN2 | CEP-701           | 0.07445  | 0.06398  | 219790 |
| RTKN2 | CGP-082996        | -0.00879 | 0.947569 | 219790 |
| RTKN2 | CGP-60474         | 0.094982 | 0.222486 | 219790 |
| RTKN2 | CH5424802         | -0.0027  | 0.974594 | 219790 |
| RTKN2 | CHIR-99021        | 0.054041 | 0.164198 | 219790 |
| RTKN2 | CI-1040           | 0.167965 | 1.41E-05 | 219790 |
| RTKN2 | CMK               | 0.033003 | 0.807913 | 219790 |
| RTKN2 | CP466722          | -0.05604 | 0.127288 | 219790 |
| RTKN2 | CP724714          | -0.05862 | 0.24893  | 219790 |
| RTKN2 | CUDC-101          | -0.08123 | 0.027037 | 219790 |
| RTKN2 | CX-5461           | -0.08383 | 0.021865 | 219790 |
| RTKN2 | Camptothecin      | 0.032884 | 0.489338 | 219790 |
| RTKN2 | Cetuximab         | 0.053728 | 0.193511 | 219790 |
| RTKN2 | Cisplatin         | 0.034788 | 0.503927 | 219790 |
| RTKN2 | Crizotinib        | 0.09195  | 0.421909 | 219790 |
| RTKN2 | Cyclopamine       | 0.074852 | 0.458899 | 219790 |
| RTKN2 | Cytarabine        | 0.043567 | 0.398529 | 219790 |
| RTKN2 | DMOG              | 0.018369 | 0.729721 | 219790 |
| RTKN2 | Dabrafenib        | 0.125092 | 0.00129  | 219790 |



|       |                    |          |          |        |
|-------|--------------------|----------|----------|--------|
| RTKN2 | Dasatinib          | 0.066545 | 0.33     | 219790 |
| RTKN2 | Docetaxel          | 0.144734 | 8.01E-05 | 219790 |
| RTKN2 | Doxorubicin        | 0.027286 | 0.701161 | 219790 |
| RTKN2 | EHT 1864           | 0.057718 | 0.341996 | 219790 |
| RTKN2 | EKB-569            | -0.06269 | 0.116759 | 219790 |
| RTKN2 | EX-527             | 0.023498 | 0.849445 | 219790 |
| RTKN2 | Elesclomol         | 0.047924 | 0.29072  | 219790 |
| RTKN2 | Embelin            | 0.040366 | 0.505029 | 219790 |
| RTKN2 | Epothilone B       | 0.012009 | 0.849324 | 219790 |
| RTKN2 | Erlotinib          | 0.022196 | 0.786386 | 219790 |
| RTKN2 | Etoposide          | 0.016203 | 0.777876 | 219790 |
| RTKN2 | FH535              | 0.129101 | 0.001829 | 219790 |
| RTKN2 | FK866              | -0.0487  | 0.195684 | 219790 |
| RTKN2 | FMK                | -0.0069  | 0.940099 | 219790 |
| RTKN2 | FR-180204          | 0.009482 | 0.891587 | 219790 |
| RTKN2 | FTI-277            | 0.090182 | 0.02478  | 219790 |
| RTKN2 | Foretinib          | -0.02196 | 0.639849 | 219790 |
| RTKN2 | GDC0449            | 0.08364  | 0.273525 | 219790 |
| RTKN2 | GDC0941            | 0.00785  | 0.913933 | 219790 |
| RTKN2 | GNF-2              | 0.046938 | 0.85036  | 219790 |
| RTKN2 | GSK-650394         | -0.00923 | 0.929924 | 219790 |
| RTKN2 | GSK1070916         | -0.1321  | 0.00022  | 219790 |
| RTKN2 | GSK1904529A        | -0.03435 | 0.476614 | 219790 |
| RTKN2 | GSK2126458         | -0.06935 | 0.065259 | 219790 |
| RTKN2 | GSK269962A         | 0.072841 | 0.111008 | 219790 |
| RTKN2 | GSK429286A         | 0.000614 | 0.990509 | 219790 |
| RTKN2 | GSK690693          | -0.11805 | 0.001001 | 219790 |
| RTKN2 | GW 441756          | 0.037638 | 0.848405 | 219790 |
| RTKN2 | GW-2580            | -0.04526 | 0.879403 | 219790 |
| RTKN2 | GW843682X          | -0.04906 | 0.605013 | 219790 |
| RTKN2 | Gefitinib          | 0.050819 | 0.226934 | 219790 |
| RTKN2 | Gemcitabine        | 0.017135 | 0.765511 | 219790 |
| RTKN2 | Genentech Cpd 10   | -0.10093 | 0.00529  | 219790 |
| RTKN2 | HG-5-113-01        | -0.06864 | 0.322107 | 219790 |
| RTKN2 | HG-5-88-01         | -0.0359  | 0.830258 | 219790 |
| RTKN2 | HG-6-64-1          | 0.071555 | 0.109154 | 219790 |
| RTKN2 | I-BET-762          | -0.00319 | 0.937496 | 219790 |
| RTKN2 | IOX2               | 0.043142 | 0.45922  | 219790 |
| RTKN2 | IPA-3              | 0.012624 | 0.782533 | 219790 |
| RTKN2 | Imatinib           | 0.070433 | 0.614803 | 219790 |
| RTKN2 | Ispinesib Mesylate | -0.04808 | 0.205573 | 219790 |
| RTKN2 | JNJ-26854165       | 0.094407 | 0.034218 | 219790 |
| RTKN2 | JNK Inhibitor VIII | 0.061023 | 0.151486 | 219790 |
| RTKN2 | JNK-9L             | 0.057389 | 0.280743 | 219790 |
| RTKN2 | JQ1                | 0.044366 | 0.309334 | 219790 |
| RTKN2 | JQ12               | 0.023541 | 0.699943 | 219790 |
| RTKN2 | JW-7-24-1          | -0.03689 | 0.328854 | 219790 |
| RTKN2 | JW-7-52-1          | 0.078451 | 0.403215 | 219790 |
| RTKN2 | KIN001-055         | 0.016126 | 0.847417 | 219790 |
| RTKN2 | KIN001-102         | -0.08066 | 0.023899 | 219790 |

|       |                    |          |          |        |
|-------|--------------------|----------|----------|--------|
| RTKN2 | KIN001-135         | 0.020504 | 0.876037 | 219790 |
| RTKN2 | KIN001-236         | -0.03678 | 0.346298 | 219790 |
| RTKN2 | KIN001-244         | 0.006553 | 0.88033  | 219790 |
| RTKN2 | KIN001-260         | 0.046178 | 0.220915 | 219790 |
| RTKN2 | KIN001-266         | -0.07341 | 0.10325  | 219790 |
| RTKN2 | KIN001-270         | -0.0435  | 0.28586  | 219790 |
| RTKN2 | KU-55933           | 0.019492 | 0.794189 | 219790 |
| RTKN2 | LAQ824             | -0.05806 | 0.148032 | 219790 |
| RTKN2 | LFM-A13            | 0.056112 | 0.255233 | 219790 |
| RTKN2 | LY317615           | -0.05539 | 0.201846 | 219790 |
| RTKN2 | Lapatinib          | 0.020888 | 0.76659  | 219790 |
| RTKN2 | Lenalidomide       | 0.06873  | 0.27615  | 219790 |
| RTKN2 | Linifanib          | 0.068146 | 0.146604 | 219790 |
| RTKN2 | Lisitinib          | -0.03054 | 0.666344 | 219790 |
| RTKN2 | MG-132             | 0.161584 | 0.022708 | 219790 |
| RTKN2 | MK-2206            | -0.03338 | 0.54349  | 219790 |
| RTKN2 | MLN4924            | 0.123189 | 0.013869 | 219790 |
| RTKN2 | MP470              | -0.06227 | 0.145026 | 219790 |
| RTKN2 | MPS-1-IN-1         | -0.04868 | 0.210428 | 219790 |
| RTKN2 | MS-275             | -0.03066 | 0.749469 | 219790 |
| RTKN2 | Masitinib          | 0.05923  | 0.120553 | 219790 |
| RTKN2 | Methotrexate       | -0.00641 | 0.879824 | 219790 |
| RTKN2 | Midostaurin        | 0.061444 | 0.160116 | 219790 |
| RTKN2 | Mitomycin C        | -0.00024 | 0.99718  | 219790 |
| RTKN2 | NG-25              | 0.018545 | 0.641198 | 219790 |
| RTKN2 | NPK76-II-72-1      | -0.08508 | 0.016217 | 219790 |
| RTKN2 | NSC-207895         | -0.08474 | 0.04118  | 219790 |
| RTKN2 | NSC-87877          | 0.02598  | 0.674704 | 219790 |
| RTKN2 | NU-7441            | 0.03536  | 0.643902 | 219790 |
| RTKN2 | Navitoclax         | -0.13439 | 0.00023  | 219790 |
| RTKN2 | Nilotinib          | 0.085108 | 0.063614 | 219790 |
| RTKN2 | Nutlin-3a (-)      | 0.137948 | 0.000801 | 219790 |
| RTKN2 | OSI-027            | -0.04986 | 0.1815   | 219790 |
| RTKN2 | OSI-930            | 0.039242 | 0.334385 | 219790 |
| RTKN2 | OSU-03012          | -0.00782 | 0.904584 | 219790 |
| RTKN2 | Obatoclax Mesylate | 0.053363 | 0.256573 | 219790 |
| RTKN2 | Olaparib           | 0.029415 | 0.528483 | 219790 |
| RTKN2 | PAC-1              | -0.04219 | 0.33589  | 219790 |
| RTKN2 | PD-0325901         | 0.174931 | 2.7E-06  | 219790 |
| RTKN2 | PD-0332991         | 0.015688 | 0.820455 | 219790 |
| RTKN2 | PD-173074          | 0.02491  | 0.892985 | 219790 |
| RTKN2 | PF-4708671         | 0.044096 | 0.646626 | 219790 |
| RTKN2 | PF-562271          | 0.011923 | 0.863507 | 219790 |
| RTKN2 | PFI-1              | 0.093845 | 0.029631 | 219790 |
| RTKN2 | PHA-665752         | 0.074406 | 0.591928 | 219790 |
| RTKN2 | PHA-793887         | -0.04256 | 0.246274 | 219790 |
| RTKN2 | PI-103             | -0.04184 | 0.267957 | 219790 |
| RTKN2 | PIK-93             | -0.04898 | 0.181278 | 219790 |
| RTKN2 | PLX4720            | 0.125489 | 0.000806 | 219790 |
| RTKN2 | Paclitaxel         | 0.039013 | 0.75204  | 219790 |

|       |                     |          |          |        |
|-------|---------------------|----------|----------|--------|
| RTKN2 | Parthenolide        | 0.030722 | 0.799665 | 219790 |
| RTKN2 | Pazopanib           | 0.061015 | 0.241848 | 219790 |
| RTKN2 | Phenformin          | 0.031928 | 0.419876 | 219790 |
| RTKN2 | Pyrimethamine       | 0.017285 | 0.904473 | 219790 |
| RTKN2 | QL-VIII-58          | 0.059477 | 0.436489 | 219790 |
| RTKN2 | QL-X-138            | -0.06981 | 0.059265 | 219790 |
| RTKN2 | QL-XI-92            | -0.00033 | 0.993801 | 219790 |
| RTKN2 | QL-XII-47           | -0.00296 | 0.952247 | 219790 |
| RTKN2 | QL-XII-61           | -0.01477 | 0.861759 | 219790 |
| RTKN2 | QS11                | -0.01272 | 0.876079 | 219790 |
| RTKN2 | RDEA119             | 0.197763 | 8.14E-09 | 219790 |
| RTKN2 | RO-3306             | 0.092725 | 0.023105 | 219790 |
| RTKN2 | Rapamycin           | -0.00423 | 0.983009 | 219790 |
| RTKN2 | Roscovitine         | 0.105662 | 0.442409 | 219790 |
| RTKN2 | Ruxolitinib         | 0.049947 | 0.316544 | 219790 |
| RTKN2 | S-Trityl-L-cysteine | 0.050635 | 0.560564 | 219790 |
| RTKN2 | SB 216763           | 0.086134 | 0.068333 | 219790 |
| RTKN2 | SB 505124           | -0.00451 | 0.969615 | 219790 |
| RTKN2 | SB52334             | -0.09862 | 0.016214 | 219790 |
| RTKN2 | SB590885            | 0.134023 | 0.001424 | 219790 |
| RTKN2 | SGC0946             | -0.01434 | 0.829934 | 219790 |
| RTKN2 | SL 0101-1           | 0.052826 | 0.481058 | 219790 |
| RTKN2 | SN-38               | 0.050743 | 0.250371 | 219790 |
| RTKN2 | SNX-2112            | 0.021487 | 0.591703 | 219790 |
| RTKN2 | STF-62247           | 0.019097 | 0.679018 | 219790 |
| RTKN2 | Salubrinal          | 0.03192  | 0.73936  | 219790 |
| RTKN2 | Saracatinib         | 0.018384 | 0.85312  | 219790 |
| RTKN2 | Shikonin            | -0.00991 | 0.880631 | 219790 |
| RTKN2 | Sorafenib           | 0.142676 | 0.074278 | 219790 |
| RTKN2 | Sunitinib           | 0.086309 | 0.228042 | 219790 |
| RTKN2 | T0901317            | -0.03646 | 0.39717  | 219790 |
| RTKN2 | TAE684              | 0.011171 | 0.945212 | 219790 |
| RTKN2 | TAK-715             | -0.03213 | 0.407828 | 219790 |
| RTKN2 | TG101348            | -0.00711 | 0.862588 | 219790 |
| RTKN2 | TGX221              | 0.083587 | 0.196052 | 219790 |
| RTKN2 | THZ-2-102-1         | -0.01096 | 0.789384 | 219790 |
| RTKN2 | THZ-2-49            | 0.021225 | 0.599193 | 219790 |
| RTKN2 | TL-1-85             | 0.049471 | 0.187725 | 219790 |
| RTKN2 | TL-2-105            | -0.00687 | 0.87301  | 219790 |
| RTKN2 | TPCA-1              | -0.0344  | 0.360153 | 219790 |
| RTKN2 | TW 37               | 0.060287 | 0.17629  | 219790 |
| RTKN2 | Talazoparib         | 0.0166   | 0.750962 | 219790 |
| RTKN2 | Tamoxifen           | 0.029838 | 0.815286 | 219790 |
| RTKN2 | Temozolomide        | 0.0971   | 0.058264 | 219790 |
| RTKN2 | Temsirolimus        | 0.097602 | 0.023635 | 219790 |
| RTKN2 | Thapsigargin        | -0.00673 | 0.942082 | 219790 |
| RTKN2 | Tipifarnib          | 0.039515 | 0.559779 | 219790 |
| RTKN2 | Tivozanib           | 0.054405 | 0.319104 | 219790 |
| RTKN2 | Trametinib          | 0.21027  | 1.73E-09 | 219790 |
| RTKN2 | Tubastatin A        | -0.04776 | 0.196602 | 219790 |

|       |                    |          |          |        |
|-------|--------------------|----------|----------|--------|
| RTKN2 | UNC0638            | 0.000552 | 0.989546 | 219790 |
| RTKN2 | UNC1215            | 0.026023 | 0.644524 | 219790 |
| RTKN2 | VNLG/124           | 0.068475 | 0.090076 | 219790 |
| RTKN2 | VX-11e             | 0.056914 | 0.217743 | 219790 |
| RTKN2 | VX-680             | -0.04892 | 0.623808 | 219790 |
| RTKN2 | VX-702             | 0.084214 | 0.490743 | 219790 |
| RTKN2 | Veliparib          | 0.081459 | 0.187487 | 219790 |
| RTKN2 | Vinblastine        | 0.113117 | 0.005143 | 219790 |
| RTKN2 | Vinorelbine        | -0.00906 | 0.898911 | 219790 |
| RTKN2 | Vorinostat         | -0.05419 | 0.150172 | 219790 |
| RTKN2 | WH-4-023           | 0.080753 | 0.286699 | 219790 |
| RTKN2 | WZ-1-84            | 0.009189 | 0.924791 | 219790 |
| RTKN2 | WZ3105             | -0.10288 | 0.003644 | 219790 |
| RTKN2 | XAV939             | 0.007211 | 0.875894 | 219790 |
| RTKN2 | XL-184             | 0.017127 | 0.753328 | 219790 |
| RTKN2 | XMD11-85h          | -0.00979 | 0.967877 | 219790 |
| RTKN2 | XMD13-2            | -0.04155 | 0.270199 | 219790 |
| RTKN2 | XMD14-99           | 0.004649 | 0.918421 | 219790 |
| RTKN2 | XMD15-27           | -0.01597 | 0.774608 | 219790 |
| RTKN2 | XMD8-85            | 0.126176 | 0.079776 | 219790 |
| RTKN2 | XMD8-92            | 0.020447 | 0.88257  | 219790 |
| RTKN2 | Y-39983            | -0.00548 | 0.902056 | 219790 |
| RTKN2 | YK 4-279           | 0.080291 | 0.09785  | 219790 |
| RTKN2 | YM155              | -0.05331 | 0.287525 | 219790 |
| RTKN2 | YM201636           | -0.06337 | 0.089017 | 219790 |
| RTKN2 | Z-LLN1e-CHO        | 0.173769 | 0.005505 | 219790 |
| RTKN2 | ZG-10              | -0.06521 | 0.32236  | 219790 |
| RTKN2 | ZM-447439          | -0.02754 | 0.593736 | 219790 |
| RTKN2 | ZSTK474            | -0.06361 | 0.084695 | 219790 |
| RTKN2 | Zibotentan         | 0.005666 | 0.990687 | 219790 |
| RTKN2 | piperlongumine     | 0.097014 | 0.015352 | 219790 |
| RTKN2 | rTRAIL             | 0.027932 | 0.731938 | 219790 |
| RTKN2 | selumetinib        | 0.183813 | 1.04E-07 | 219790 |
| SKA3  | (5Z)-7-Oxozeaenol  | 0.142258 | 0.000122 | 221150 |
| SKA3  | 17-AAG             | 0.193613 | 6.71E-08 | 221150 |
| SKA3  | 5-Fluorouracil     | -0.0973  | 0.007132 | 221150 |
| SKA3  | 681640             | 0.014305 | 0.841517 | 221150 |
| SKA3  | A-443654           | -0.00446 | 0.987925 | 221150 |
| SKA3  | A-770041           | 0.003415 | 0.976152 | 221150 |
| SKA3  | AC220              | -0.06842 | 0.12327  | 221150 |
| SKA3  | AG-014699          | 0.017345 | 0.720076 | 221150 |
| SKA3  | AICAR              | -0.10968 | 0.004338 | 221150 |
| SKA3  | AKT inhibitor VIII | 0.078488 | 0.068622 | 221150 |
| SKA3  | AMG-706            | 0.026358 | 0.705945 | 221150 |
| SKA3  | AP-24534           | -0.10318 | 0.008138 | 221150 |
| SKA3  | AR-42              | -0.16671 | 1.71E-06 | 221150 |
| SKA3  | AS601245           | 0.07502  | 0.126769 | 221150 |
| SKA3  | AS605240           | -0.05701 | 0.179156 | 221150 |
| SKA3  | AT-7519            | -0.1576  | 5.81E-06 | 221150 |
| SKA3  | ATRA               | -0.0549  | 0.255324 | 221150 |

|      |                   |          |          |        |
|------|-------------------|----------|----------|--------|
| SKA3 | AUY922            | 0.015677 | 0.808003 | 221150 |
| SKA3 | AZ628             | 0.070325 | 0.348809 | 221150 |
| SKA3 | AZD6482           | -0.0061  | 0.923029 | 221150 |
| SKA3 | AZD7762           | -0.15199 | 5.68E-05 | 221150 |
| SKA3 | AZD8055           | -0.11119 | 0.003763 | 221150 |
| SKA3 | Afatinib          | 0.117324 | 0.001044 | 221150 |
| SKA3 | Axitinib          | -0.06789 | 0.164045 | 221150 |
| SKA3 | BAY 61-3606       | -0.06149 | 0.133733 | 221150 |
| SKA3 | BEZ235            | 0.019853 | 0.724319 | 221150 |
| SKA3 | BHG712            | -0.14877 | 2.21E-05 | 221150 |
| SKA3 | BI-2536           | -0.15236 | 0.078709 | 221150 |
| SKA3 | BIRB 0796         | 0.047013 | 0.363733 | 221150 |
| SKA3 | BIX02189          | -0.19126 | 3.78E-08 | 221150 |
| SKA3 | BMS-509744        | -0.02012 | 0.85522  | 221150 |
| SKA3 | BMS-536924        | -0.01876 | 0.824342 | 221150 |
| SKA3 | BMS-708163        | 0.089672 | 0.021878 | 221150 |
| SKA3 | BMS-754807        | -0.00245 | 0.972274 | 221150 |
| SKA3 | BMS345541         | -0.20246 | 4.04E-09 | 221150 |
| SKA3 | BX-795            | -0.10319 | 0.012673 | 221150 |
| SKA3 | BX-912            | -0.21036 | 6.85E-10 | 221150 |
| SKA3 | Belinostat        | -0.13189 | 0.000261 | 221150 |
| SKA3 | Bexarotene        | 0.016159 | 0.869021 | 221150 |
| SKA3 | Bicalutamide      | 0.006994 | 0.90223  | 221150 |
| SKA3 | Bleomycin         | 0.046539 | 0.400795 | 221150 |
| SKA3 | Bleomycin (50 uM) | 0.154596 | 1.1E-05  | 221150 |
| SKA3 | Bortezomib        | 0.095582 | 0.191651 | 221150 |
| SKA3 | Bosutinib         | -0.04746 | 0.371649 | 221150 |
| SKA3 | Bryostatins 1     | 0.052019 | 0.309933 | 221150 |
| SKA3 | CAL-101           | -0.12404 | 0.00061  | 221150 |
| SKA3 | CAY10603          | -0.14631 | 2.89E-05 | 221150 |
| SKA3 | CCT007093         | 0.087751 | 0.032751 | 221150 |
| SKA3 | CCT018159         | 0.046102 | 0.37055  | 221150 |
| SKA3 | CEP-701           | -0.10347 | 0.008013 | 221150 |
| SKA3 | CGP-082996        | -0.0285  | 0.808834 | 221150 |
| SKA3 | CGP-60474         | 0.021195 | 0.84281  | 221150 |
| SKA3 | CH5424802         | -0.05372 | 0.329059 | 221150 |
| SKA3 | CHIR-99021        | 0.020658 | 0.628743 | 221150 |
| SKA3 | CI-1040           | 0.064988 | 0.131268 | 221150 |
| SKA3 | CMK               | 0.037018 | 0.780703 | 221150 |
| SKA3 | CP466722          | -0.18296 | 1.13E-07 | 221150 |
| SKA3 | CP724714          | 0.076881 | 0.104481 | 221150 |
| SKA3 | CUDC-101          | -0.12605 | 0.000447 | 221150 |
| SKA3 | CX-5461           | -0.14289 | 5.54E-05 | 221150 |
| SKA3 | Camptothecin      | -0.09979 | 0.014071 | 221150 |
| SKA3 | Cetuximab         | 0.122419 | 0.00142  | 221150 |
| SKA3 | Cisplatin         | -0.00385 | 0.954238 | 221150 |
| SKA3 | Crizotinib        | -0.09059 | 0.430642 | 221150 |
| SKA3 | Cyclopamine       | -0.03198 | 0.800202 | 221150 |
| SKA3 | Cytarabine        | -0.05618 | 0.25308  | 221150 |
| SKA3 | DMOG              | -0.07436 | 0.08319  | 221150 |

|      |                    |          |          |        |
|------|--------------------|----------|----------|--------|
| SKA3 | Dabrafenib         | 0.091389 | 0.023711 | 221150 |
| SKA3 | Dasatinib          | 0.06597  | 0.3349   | 221150 |
| SKA3 | Docetaxel          | 0.116795 | 0.001596 | 221150 |
| SKA3 | Doxorubicin        | 0.01016  | 0.903794 | 221150 |
| SKA3 | EHT 1864           | 0.0132   | 0.882253 | 221150 |
| SKA3 | EKB-569            | -0.11524 | 0.002271 | 221150 |
| SKA3 | EX-527             | -0.00925 | 0.947844 | 221150 |
| SKA3 | Elesclomol         | 0.006282 | 0.907889 | 221150 |
| SKA3 | Embelin            | 0.010706 | 0.893669 | 221150 |
| SKA3 | Epothilone B       | 0.032021 | 0.557502 | 221150 |
| SKA3 | Erlotinib          | 0.145117 | 0.031472 | 221150 |
| SKA3 | Etoposide          | -0.08063 | 0.065016 | 221150 |
| SKA3 | FH535              | 0.130245 | 0.001646 | 221150 |
| SKA3 | FK866              | -0.12422 | 0.000477 | 221150 |
| SKA3 | FMK                | -0.07827 | 0.179339 | 221150 |
| SKA3 | FR-180204          | -0.07736 | 0.098167 | 221150 |
| SKA3 | FTI-277            | 0.118988 | 0.002508 | 221150 |
| SKA3 | Foretinib          | -0.11584 | 0.002148 | 221150 |
| SKA3 | GDC0449            | -0.01273 | 0.925056 | 221150 |
| SKA3 | GDC0941            | -0.04782 | 0.38437  | 221150 |
| SKA3 | GNF-2              | -0.06773 | 0.759599 | 221150 |
| SKA3 | GSK-650394         | -0.0158  | 0.867426 | 221150 |
| SKA3 | GSK1070916         | -0.2436  | 1.64E-12 | 221150 |
| SKA3 | GSK1904529A        | 0.049618 | 0.280527 | 221150 |
| SKA3 | GSK2126458         | -0.13141 | 0.000267 | 221150 |
| SKA3 | GSK269962A         | 0.024529 | 0.681063 | 221150 |
| SKA3 | GSK429286A         | -0.14058 | 0.000163 | 221150 |
| SKA3 | GSK690693          | -0.16671 | 2.11E-06 | 221150 |
| SKA3 | GW 441756          | 0.026927 | 0.905152 | 221150 |
| SKA3 | GW-2580            | -0.0302  | 0.94536  | 221150 |
| SKA3 | GW843682X          | -0.15741 | 0.032444 | 221150 |
| SKA3 | Gefitinib          | 0.125596 | 0.001291 | 221150 |
| SKA3 | Gemcitabine        | -0.06449 | 0.170906 | 221150 |
| SKA3 | Genentech Cpd 10   | -0.18245 | 1.64E-07 | 221150 |
| SKA3 | HG-5-113-01        | -0.03781 | 0.631864 | 221150 |
| SKA3 | HG-5-88-01         | -0.01294 | 0.952514 | 221150 |
| SKA3 | HG-6-64-1          | -0.00684 | 0.913168 | 221150 |
| SKA3 | I-BET-762          | -0.20749 | 9.83E-10 | 221150 |
| SKA3 | IOX2               | 0.033165 | 0.587655 | 221150 |
| SKA3 | IPA-3              | -0.08355 | 0.031298 | 221150 |
| SKA3 | Imatinib           | -0.10601 | 0.32014  | 221150 |
| SKA3 | Ispinesib Mesylate | -0.1219  | 0.000636 | 221150 |
| SKA3 | JNJ-26854165       | 0.001264 | 0.988425 | 221150 |
| SKA3 | JNK Inhibitor VIII | 0.07114  | 0.08966  | 221150 |
| SKA3 | JNK-9L             | -0.01096 | 0.881815 | 221150 |
| SKA3 | JQ1                | -0.03208 | 0.479817 | 221150 |
| SKA3 | JQ12               | -0.02665 | 0.657931 | 221150 |
| SKA3 | JW-7-24-1          | -0.16387 | 2.32E-06 | 221150 |
| SKA3 | JW-7-52-1          | 0.002204 | 0.989896 | 221150 |
| SKA3 | KIN001-055         | 0.026913 | 0.710531 | 221150 |

|      |                    |          |          |        |
|------|--------------------|----------|----------|--------|
| SKA3 | KIN001-102         | -0.17406 | 4.47E-07 | 221150 |
| SKA3 | KIN001-135         | 0.077181 | 0.428196 | 221150 |
| SKA3 | KIN001-236         | -0.12331 | 0.0006   | 221150 |
| SKA3 | KIN001-244         | -0.14544 | 4.15E-05 | 221150 |
| SKA3 | KIN001-260         | -0.1303  | 0.000236 | 221150 |
| SKA3 | KIN001-266         | -0.07869 | 0.077251 | 221150 |
| SKA3 | KIN001-270         | -0.09596 | 0.011461 | 221150 |
| SKA3 | KU-55933           | -0.04597 | 0.446507 | 221150 |
| SKA3 | LAQ824             | -0.13266 | 0.000406 | 221150 |
| SKA3 | LFM-A13            | 0.049877 | 0.322973 | 221150 |
| SKA3 | LY317615           | -0.10732 | 0.007321 | 221150 |
| SKA3 | Lapatinib          | 0.191727 | 0.001052 | 221150 |
| SKA3 | Lenalidomide       | -0.03629 | 0.645897 | 221150 |
| SKA3 | Linifanib          | -0.0449  | 0.386084 | 221150 |
| SKA3 | Lisitinib          | -0.00781 | 0.932215 | 221150 |
| SKA3 | MG-132             | 0.086941 | 0.288674 | 221150 |
| SKA3 | MK-2206            | -0.09598 | 0.039695 | 221150 |
| SKA3 | MLN4924            | 0.102567 | 0.04447  | 221150 |
| SKA3 | MP470              | -0.03673 | 0.416292 | 221150 |
| SKA3 | MPS-1-IN-1         | -0.10934 | 0.002816 | 221150 |
| SKA3 | MS-275             | -0.15188 | 0.030158 | 221150 |
| SKA3 | Masitinib          | -0.1454  | 5E-05    | 221150 |
| SKA3 | Methotrexate       | -0.18606 | 1.95E-07 | 221150 |
| SKA3 | Midostaurin        | 0.028446 | 0.558762 | 221150 |
| SKA3 | Mitomycin C        | -0.06388 | 0.186777 | 221150 |
| SKA3 | NG-25              | -0.14792 | 2.29E-05 | 221150 |
| SKA3 | NPK76-II-72-1      | -0.2649  | 2.52E-15 | 221150 |
| SKA3 | NSC-207895         | -0.1129  | 0.004816 | 221150 |
| SKA3 | NSC-87877          | 0.068385 | 0.19447  | 221150 |
| SKA3 | NU-7441            | -0.02279 | 0.793044 | 221150 |
| SKA3 | Navitoclax         | -0.25309 | 6.88E-13 | 221150 |
| SKA3 | Nilotinib          | -0.10063 | 0.023978 | 221150 |
| SKA3 | Nutlin-3a (-)      | 0.03799  | 0.451234 | 221150 |
| SKA3 | OSI-027            | -0.14127 | 6.17E-05 | 221150 |
| SKA3 | OSI-930            | -0.08969 | 0.017691 | 221150 |
| SKA3 | OSU-03012          | -0.05388 | 0.266699 | 221150 |
| SKA3 | Obatoclax Mesylate | 0.001574 | 0.981335 | 221150 |
| SKA3 | Olaparib           | 0.016308 | 0.744477 | 221150 |
| SKA3 | PAC-1              | -0.16056 | 2.63E-05 | 221150 |
| SKA3 | PD-0325901         | 0.152371 | 5.15E-05 | 221150 |
| SKA3 | PD-0332991         | -0.04113 | 0.470001 | 221150 |
| SKA3 | PD-173074          | 0.008645 | 0.974013 | 221150 |
| SKA3 | PF-4708671         | 0.046579 | 0.618355 | 221150 |
| SKA3 | PF-562271          | 0.009021 | 0.900504 | 221150 |
| SKA3 | PFI-1              | 0.028457 | 0.590093 | 221150 |
| SKA3 | PHA-665752         | 0.017972 | 0.918175 | 221150 |
| SKA3 | PHA-793887         | -0.16445 | 1.72E-06 | 221150 |
| SKA3 | PI-103             | -0.12966 | 0.00025  | 221150 |
| SKA3 | PIK-93             | -0.19981 | 4.87E-09 | 221150 |
| SKA3 | PLX4720            | 0.096573 | 0.012822 | 221150 |

|      |                     |          |          |        |
|------|---------------------|----------|----------|--------|
| SKA3 | Paclitaxel          | 0.00574  | 0.973869 | 221150 |
| SKA3 | Parthenolide        | -0.02448 | 0.845281 | 221150 |
| SKA3 | Pazopanib           | 0.021442 | 0.73425  | 221150 |
| SKA3 | Phenformin          | -0.09915 | 0.006733 | 221150 |
| SKA3 | Pyrimethamine       | -0.09429 | 0.372382 | 221150 |
| SKA3 | QL-VIII-58          | 0.042364 | 0.607675 | 221150 |
| SKA3 | QL-X-138            | -0.15666 | 9.1E-06  | 221150 |
| SKA3 | QL-XI-92            | -0.17313 | 6.66E-07 | 221150 |
| SKA3 | QL-XII-47           | -0.07264 | 0.063949 | 221150 |
| SKA3 | QL-XII-61           | -0.1086  | 0.071837 | 221150 |
| SKA3 | QS11                | -0.08457 | 0.120655 | 221150 |
| SKA3 | RDEA119             | 0.165068 | 1.93E-06 | 221150 |
| SKA3 | RO-3306             | 0.103763 | 0.010423 | 221150 |
| SKA3 | Rapamycin           | 0.00989  | 0.955754 | 221150 |
| SKA3 | Roscovitine         | 0.080253 | 0.602306 | 221150 |
| SKA3 | Ruxolitinib         | -0.0429  | 0.403468 | 221150 |
| SKA3 | S-Trytyl-L-cysteine | -0.05354 | 0.532807 | 221150 |
| SKA3 | SB 216763           | 0.065556 | 0.177368 | 221150 |
| SKA3 | SB 505124           | 0.029497 | 0.718937 | 221150 |
| SKA3 | SB52334             | -0.03726 | 0.454786 | 221150 |
| SKA3 | SB590885            | 0.124288 | 0.003519 | 221150 |
| SKA3 | SGC0946             | 0.04909  | 0.346224 | 221150 |
| SKA3 | SL 0101-1           | 0.014408 | 0.878841 | 221150 |
| SKA3 | SN-38               | -0.02045 | 0.686328 | 221150 |
| SKA3 | SNX-2112            | -0.13986 | 7.57E-05 | 221150 |
| SKA3 | STF-62247           | -0.10435 | 0.006911 | 221150 |
| SKA3 | Salubrinal          | -0.05949 | 0.490235 | 221150 |
| SKA3 | Saracatinib         | -0.0182  | 0.854712 | 221150 |
| SKA3 | Shikonin            | -0.02259 | 0.709216 | 221150 |
| SKA3 | Sorafenib           | -0.02756 | 0.831812 | 221150 |
| SKA3 | Sunitinib           | -0.12137 | 0.070755 | 221150 |
| SKA3 | TO901317            | -0.09479 | 0.015005 | 221150 |
| SKA3 | TAE684              | -0.03192 | 0.813485 | 221150 |
| SKA3 | TAK-715             | -0.13815 | 9.04E-05 | 221150 |
| SKA3 | TG101348            | -0.20034 | 5.18E-09 | 221150 |
| SKA3 | TGX221              | 0.11266  | 0.071664 | 221150 |
| SKA3 | THZ-2-102-1         | -0.17173 | 9.17E-07 | 221150 |
| SKA3 | THZ-2-49            | -0.10462 | 0.003945 | 221150 |
| SKA3 | TL-1-85             | -0.16366 | 2.62E-06 | 221150 |
| SKA3 | TL-2-105            | -0.15023 | 2.47E-05 | 221150 |
| SKA3 | TPCA-1              | -0.1961  | 9.64E-09 | 221150 |
| SKA3 | TW 37               | 0.013504 | 0.810497 | 221150 |
| SKA3 | Talazoparib         | -0.01136 | 0.833281 | 221150 |
| SKA3 | Tamoxifen           | 0.026983 | 0.839806 | 221150 |
| SKA3 | Temozolomide        | 0.035894 | 0.630263 | 221150 |
| SKA3 | Temsirolimus        | -0.01051 | 0.86395  | 221150 |
| SKA3 | Thapsigargin        | 0.005292 | 0.955679 | 221150 |
| SKA3 | Tipifarnib          | 0.01748  | 0.831656 | 221150 |
| SKA3 | Tivozanib           | -0.0876  | 0.067565 | 221150 |
| SKA3 | Trametinib          | 0.223793 | 1.29E-10 | 221150 |



|      |                    |          |          |        |
|------|--------------------|----------|----------|--------|
| SKA3 | Tubastatin A       | -0.14926 | 1.87E-05 | 221150 |
| SKA3 | UNC0638            | -0.1498  | 1.15E-05 | 221150 |
| SKA3 | UNC1215            | 0.071373 | 0.127795 | 221150 |
| SKA3 | VNLG/124           | -0.08742 | 0.026365 | 221150 |
| SKA3 | VX-11e             | 0.02232  | 0.68298  | 221150 |
| SKA3 | VX-680             | -0.12236 | 0.133422 | 221150 |
| SKA3 | VX-702             | -0.02713 | 0.912545 | 221150 |
| SKA3 | Veliparib          | -0.01469 | 0.859417 | 221150 |
| SKA3 | Vinblastine        | -0.04661 | 0.301866 | 221150 |
| SKA3 | Vinorelbine        | -0.05104 | 0.34268  | 221150 |
| SKA3 | Vorinostat         | -0.17465 | 1.09E-06 | 221150 |
| SKA3 | WH-4-023           | 0.037211 | 0.666297 | 221150 |
| SKA3 | WZ-1-84            | 0.016808 | 0.858344 | 221150 |
| SKA3 | WZ3105             | -0.17611 | 3.3E-07  | 221150 |
| SKA3 | XAV939             | 0.05971  | 0.128956 | 221150 |
| SKA3 | XL-184             | -0.07064 | 0.107604 | 221150 |
| SKA3 | XMD11-85h          | 0.013745 | 0.953656 | 221150 |
| SKA3 | XMD13-2            | -0.16793 | 1.32E-06 | 221150 |
| SKA3 | XMD14-99           | -0.08556 | 0.021718 | 221150 |
| SKA3 | XMD15-27           | -0.06342 | 0.158951 | 221150 |
| SKA3 | XMD8-85            | -0.05368 | 0.531633 | 221150 |
| SKA3 | XMD8-92            | -0.03263 | 0.787803 | 221150 |
| SKA3 | Y-39983            | -0.17185 | 1.17E-06 | 221150 |
| SKA3 | YK 4-279           | 0.058669 | 0.253198 | 221150 |
| SKA3 | YM155              | -0.03881 | 0.469946 | 221150 |
| SKA3 | YM201636           | -0.12829 | 0.000317 | 221150 |
| SKA3 | Z-LLN1e-CHO        | 0.050745 | 0.522122 | 221150 |
| SKA3 | ZG-10              | -0.09882 | 0.107721 | 221150 |
| SKA3 | ZM-447439          | -0.14213 | 0.000461 | 221150 |
| SKA3 | ZSTK474            | -0.1444  | 4.2E-05  | 221150 |
| SKA3 | Zibotentan         | -0.01784 | 0.958851 | 221150 |
| SKA3 | piperlongumine     | 0.075375 | 0.068585 | 221150 |
| SKA3 | rTRAIL             | 0.024106 | 0.773622 | 221150 |
| SKA3 | selumetinib        | 0.166092 | 1.79E-06 | 221150 |
| TTK  | (5Z)-7-Oxozeaenol  | 0.169082 | 3.48E-06 | 7272   |
| TTK  | 17-AAG             | 0.138364 | 0.000146 | 7272   |
| TTK  | 5-Fluorouracil     | -0.00953 | 0.816637 | 7272   |
| TTK  | 681640             | -0.00551 | 0.940837 | 7272   |
| TTK  | A-443654           | -0.02592 | 0.911146 | 7272   |
| TTK  | A-770041           | -0.01844 | 0.856398 | 7272   |
| TTK  | AC220              | 0.000133 | 0.998189 | 7272   |
| TTK  | AG-014699          | 0.039723 | 0.368808 | 7272   |
| TTK  | AICAR              | -0.05913 | 0.143354 | 7272   |
| TTK  | AKT inhibitor VIII | 0.049369 | 0.278975 | 7272   |
| TTK  | AMG-706            | 0.040668 | 0.511837 | 7272   |
| TTK  | AP-24534           | -0.04176 | 0.33144  | 7272   |
| TTK  | AR-42              | -0.09996 | 0.005077 | 7272   |
| TTK  | AS601245           | 0.083463 | 0.081365 | 7272   |
| TTK  | AS605240           | 0.027713 | 0.556695 | 7272   |
| TTK  | AT-7519            | -0.13378 | 0.000135 | 7272   |

|     |                   |          |          |      |
|-----|-------------------|----------|----------|------|
| TTK | ATRA              | -0.02198 | 0.695722 | 7272 |
| TTK | AUY922            | 0.034994 | 0.531292 | 7272 |
| TTK | AZ628             | 0.183967 | 0.003474 | 7272 |
| TTK | AZD6482           | 0.046054 | 0.322983 | 7272 |
| TTK | AZD7762           | -0.09628 | 0.013768 | 7272 |
| TTK | AZD8055           | -0.0436  | 0.288783 | 7272 |
| TTK | Afatinib          | 0.072302 | 0.050523 | 7272 |
| TTK | Axitinib          | -0.06643 | 0.175237 | 7272 |
| TTK | BAY 61-3606       | 0.039836 | 0.353746 | 7272 |
| TTK | BEZ235            | 0.021961 | 0.6924   | 7272 |
| TTK | BHG712            | -0.04477 | 0.235296 | 7272 |
| TTK | BI-2536           | -0.11429 | 0.204518 | 7272 |
| TTK | BIRB 0796         | 0.040431 | 0.445694 | 7272 |
| TTK | BIX02189          | -0.05182 | 0.169111 | 7272 |
| TTK | BMS-509744        | 0.079689 | 0.369846 | 7272 |
| TTK | BMS-536924        | 0.064963 | 0.263096 | 7272 |
| TTK | BMS-708163        | 0.077646 | 0.048557 | 7272 |
| TTK | BMS-754807        | 0.083521 | 0.089318 | 7272 |
| TTK | BMS345541         | -0.11172 | 0.001613 | 7272 |
| TTK | BX-795            | -0.06616 | 0.133805 | 7272 |
| TTK | BX-912            | -0.12552 | 0.000334 | 7272 |
| TTK | Belinostat        | -0.08691 | 0.018726 | 7272 |
| TTK | Bexarotene        | 0.032571 | 0.68393  | 7272 |
| TTK | Bicalutamide      | 0.029989 | 0.532171 | 7272 |
| TTK | Bleomycin         | 0.054833 | 0.305926 | 7272 |
| TTK | Bleomycin (50 uM) | 0.071039 | 0.05165  | 7272 |
| TTK | Bortezomib        | 0.058879 | 0.471259 | 7272 |
| TTK | Bosutinib         | -0.03572 | 0.529098 | 7272 |
| TTK | Bryostatins 1     | 0.071528 | 0.139064 | 7272 |
| TTK | CAL-101           | -0.06205 | 0.103389 | 7272 |
| TTK | CAY10603          | -0.10962 | 0.002006 | 7272 |
| TTK | CCT007093         | 0.065593 | 0.122166 | 7272 |
| TTK | CCT018159         | -0.01186 | 0.85735  | 7272 |
| TTK | CEP-701           | -0.02276 | 0.614409 | 7272 |
| TTK | CGP-082996        | 0.007515 | 0.956265 | 7272 |
| TTK | CGP-60474         | 0.025279 | 0.80702  | 7272 |
| TTK | CH5424802         | -0.00047 | 0.996271 | 7272 |
| TTK | CHIR-99021        | 0.060456 | 0.115769 | 7272 |
| TTK | CI-1040           | 0.158272 | 4.54E-05 | 7272 |
| TTK | CMK               | 0.041546 | 0.745058 | 7272 |
| TTK | CP466722          | -0.0944  | 0.008183 | 7272 |
| TTK | CP724714          | 0.028641 | 0.6308   | 7272 |
| TTK | CUDC-101          | -0.10498 | 0.003784 | 7272 |
| TTK | CX-5461           | -0.09258 | 0.010826 | 7272 |
| TTK | Camptothecin      | -0.07706 | 0.067317 | 7272 |
| TTK | Cetuximab         | 0.04028  | 0.341541 | 7272 |
| TTK | Cisplatin         | -0.01378 | 0.819376 | 7272 |
| TTK | Crizotinib        | -0.03784 | 0.816487 | 7272 |
| TTK | Cyclopamine       | 0.004609 | 0.97485  | 7272 |
| TTK | Cytarabine        | -0.01599 | 0.790377 | 7272 |

|     |                    |          |          |      |
|-----|--------------------|----------|----------|------|
| TTK | DMOG               | -0.03446 | 0.476418 | 7272 |
| TTK | Dabrafenib         | 0.182041 | 1.06E-06 | 7272 |
| TTK | Dasatinib          | 0.036603 | 0.616957 | 7272 |
| TTK | Docetaxel          | -0.0013  | 0.97615  | 7272 |
| TTK | Doxorubicin        | 0.014601 | 0.855491 | 7272 |
| TTK | EHT 1864           | 0.052133 | 0.402449 | 7272 |
| TTK | EKB-569            | -0.05266 | 0.195473 | 7272 |
| TTK | EX-527             | 0.011708 | 0.933014 | 7272 |
| TTK | Elesclomol         | -0.03558 | 0.449312 | 7272 |
| TTK | Embelin            | 0.026301 | 0.696501 | 7272 |
| TTK | Epothilone B       | 0.00313  | 0.96103  | 7272 |
| TTK | Erlotinib          | 0.149327 | 0.026172 | 7272 |
| TTK | Etoposide          | -0.09163 | 0.032509 | 7272 |
| TTK | FH535              | 0.084985 | 0.051921 | 7272 |
| TTK | FK866              | -0.10661 | 0.002947 | 7272 |
| TTK | FMK                | 0.032009 | 0.661564 | 7272 |
| TTK | FR-180204          | 0.021866 | 0.717961 | 7272 |
| TTK | FTI-277            | 0.138353 | 0.000384 | 7272 |
| TTK | Foretinib          | -0.05601 | 0.175301 | 7272 |
| TTK | GDC0449            | 0.027389 | 0.810183 | 7272 |
| TTK | GDC0941            | -0.02547 | 0.691522 | 7272 |
| TTK | GNF-2              | -0.04358 | 0.865101 | 7272 |
| TTK | GSK-650394         | -0.00605 | 0.952702 | 7272 |
| TTK | GSK1070916         | -0.12627 | 0.000428 | 7272 |
| TTK | GSK1904529A        | 0.049363 | 0.283406 | 7272 |
| TTK | GSK2126458         | -0.07004 | 0.062483 | 7272 |
| TTK | GSK269962A         | 0.057244 | 0.240219 | 7272 |
| TTK | GSK429286A         | -0.07741 | 0.052107 | 7272 |
| TTK | GSK690693          | -0.12589 | 0.000428 | 7272 |
| TTK | GW 441756          | 0.013507 | 0.970373 | 7272 |
| TTK | GW-2580            | 0.022261 | 0.967411 | 7272 |
| TTK | GW843682X          | -0.13207 | 0.079952 | 7272 |
| TTK | Gefitinib          | 0.07379  | 0.071413 | 7272 |
| TTK | Gemcitabine        | -0.0573  | 0.232823 | 7272 |
| TTK | Genentech Cpd 10   | -0.11672 | 0.001127 | 7272 |
| TTK | HG-5-113-01        | -0.00873 | 0.926182 | 7272 |
| TTK | HG-5-88-01         | 0.052736 | 0.718896 | 7272 |
| TTK | HG-6-64-1          | 0.045766 | 0.347587 | 7272 |
| TTK | I-BET-762          | -0.08631 | 0.014185 | 7272 |
| TTK | IOX2               | -0.0087  | 0.910579 | 7272 |
| TTK | IPA-3              | -0.04742 | 0.243884 | 7272 |
| TTK | Imatinib           | -0.05793 | 0.709339 | 7272 |
| TTK | Ispinesib Mesylate | -0.07888 | 0.031304 | 7272 |
| TTK | JNJ-26854165       | 0.036415 | 0.494792 | 7272 |
| TTK | JNK Inhibitor VIII | 0.032092 | 0.479321 | 7272 |
| TTK | JNK-9L             | 0.043428 | 0.447253 | 7272 |
| TTK | JQ1                | 0.032697 | 0.470481 | 7272 |
| TTK | JQ12               | 0.022265 | 0.718275 | 7272 |
| TTK | JW-7-24-1          | -0.08568 | 0.016757 | 7272 |
| TTK | JW-7-52-1          | 0.024021 | 0.845787 | 7272 |

|     |                    |          |          |      |
|-----|--------------------|----------|----------|------|
| TTK | KIN001-055         | 0.02626  | 0.719057 | 7272 |
| TTK | KIN001-102         | -0.10836 | 0.002086 | 7272 |
| TTK | KIN001-135         | 0.077549 | 0.425168 | 7272 |
| TTK | KIN001-236         | -0.03382 | 0.389366 | 7272 |
| TTK | KIN001-244         | -0.07945 | 0.030622 | 7272 |
| TTK | KIN001-260         | -0.05652 | 0.127945 | 7272 |
| TTK | KIN001-266         | -0.01019 | 0.858811 | 7272 |
| TTK | KIN001-270         | -0.08928 | 0.019359 | 7272 |
| TTK | KU-55933           | -0.05139 | 0.378518 | 7272 |
| TTK | LAQ824             | -0.05876 | 0.142948 | 7272 |
| TTK | LFM-A13            | 0.07713  | 0.102259 | 7272 |
| TTK | LY317615           | -0.00963 | 0.85886  | 7272 |
| TTK | Lapatinib          | 0.155255 | 0.009615 | 7272 |
| TTK | Lenalidomide       | -0.00431 | 0.971792 | 7272 |
| TTK | Linifanib          | 0.022476 | 0.710602 | 7272 |
| TTK | Lisitinib          | 0.069747 | 0.213702 | 7272 |
| TTK | MG-132             | 0.060921 | 0.499525 | 7272 |
| TTK | MK-2206            | -0.09208 | 0.049664 | 7272 |
| TTK | MLN4924            | 0.04474  | 0.438855 | 7272 |
| TTK | MP470              | -0.04509 | 0.305879 | 7272 |
| TTK | MPS-1-IN-1         | -0.01579 | 0.710364 | 7272 |
| TTK | MS-275             | -0.09802 | 0.195278 | 7272 |
| TTK | Masitinib          | -0.05284 | 0.170275 | 7272 |
| TTK | Methotrexate       | -0.05327 | 0.163707 | 7272 |
| TTK | Midostaurin        | 0.05399  | 0.224099 | 7272 |
| TTK | Mitomycin C        | 0.002597 | 0.969984 | 7272 |
| TTK | NG-25              | -0.09045 | 0.011664 | 7272 |
| TTK | NPK76-II-72-1      | -0.18523 | 5.61E-08 | 7272 |
| TTK | NSC-207895         | -0.1586  | 5.22E-05 | 7272 |
| TTK | NSC-87877          | 0.084819 | 0.099104 | 7272 |
| TTK | NU-7441            | -0.01277 | 0.900815 | 7272 |
| TTK | Navitoclax         | -0.17565 | 1.03E-06 | 7272 |
| TTK | Nilotinib          | -0.08847 | 0.052486 | 7272 |
| TTK | Nutlin-3a (-)      | 0.210104 | 9.83E-08 | 7272 |
| TTK | OSI-027            | -0.09237 | 0.010243 | 7272 |
| TTK | OSI-930            | -0.02386 | 0.575719 | 7272 |
| TTK | OSU-03012          | -0.00542 | 0.936758 | 7272 |
| TTK | Obatoclax Mesylate | 0.027384 | 0.597076 | 7272 |
| TTK | Olaparib           | 0.00319  | 0.952783 | 7272 |
| TTK | PAC-1              | -0.02831 | 0.541813 | 7272 |
| TTK | PD-0325901         | 0.1918   | 2.33E-07 | 7272 |
| TTK | PD-0332991         | 0.064894 | 0.207352 | 7272 |
| TTK | PD-173074          | 0.000783 | 0.996072 | 7272 |
| TTK | PF-4708671         | 0.086719 | 0.285271 | 7272 |
| TTK | PF-562271          | 0.03292  | 0.585408 | 7272 |
| TTK | PFI-1              | 0.067921 | 0.134236 | 7272 |
| TTK | PHA-665752         | 0.091231 | 0.494896 | 7272 |
| TTK | PHA-793887         | -0.09344 | 0.007977 | 7272 |
| TTK | PI-103             | -0.09616 | 0.007417 | 7272 |
| TTK | PIK-93             | -0.11723 | 0.00081  | 7272 |

|     |                     |          |          |      |
|-----|---------------------|----------|----------|------|
| TTK | PLX4720             | 0.178907 | 5.88E-07 | 7272 |
| TTK | Paclitaxel          | -0.01513 | 0.922295 | 7272 |
| TTK | Parthenolide        | -0.01954 | 0.87983  | 7272 |
| TTK | Pazopanib           | 0.049059 | 0.368079 | 7272 |
| TTK | Phenformin          | -0.02659 | 0.507694 | 7272 |
| TTK | Pyrimethamine       | -0.03546 | 0.78008  | 7272 |
| TTK | QL-VIII-58          | -0.00275 | 0.981539 | 7272 |
| TTK | QL-X-138            | -0.11826 | 0.000978 | 7272 |
| TTK | QL-XI-92            | -0.08977 | 0.012655 | 7272 |
| TTK | QL-XII-47           | -0.06438 | 0.104674 | 7272 |
| TTK | QL-XII-61           | -0.04661 | 0.510489 | 7272 |
| TTK | QS11                | -0.04367 | 0.486864 | 7272 |
| TTK | RDEA119             | 0.226839 | 2.68E-11 | 7272 |
| TTK | RO-3306             | 0.020167 | 0.65987  | 7272 |
| TTK | Rapamycin           | -0.02691 | 0.85913  | 7272 |
| TTK | Roscovitine         | 0.082216 | 0.592831 | 7272 |
| TTK | Ruxolitinib         | -0.04154 | 0.423039 | 7272 |
| TTK | S-Trityl-L-cysteine | -0.03672 | 0.691991 | 7272 |
| TTK | SB 216763           | 0.048789 | 0.330723 | 7272 |
| TTK | SB 505124           | 0.058851 | 0.391247 | 7272 |
| TTK | SB52334             | 0.04762  | 0.315576 | 7272 |
| TTK | SB590885            | 0.188014 | 1.66E-06 | 7272 |
| TTK | SGC0946             | 0.064679 | 0.185542 | 7272 |
| TTK | SL 0101-1           | 0.080436 | 0.271668 | 7272 |
| TTK | SN-38               | 0.001589 | 0.978926 | 7272 |
| TTK | SNX-2112            | -0.07537 | 0.039895 | 7272 |
| TTK | STF-62247           | -0.01976 | 0.667043 | 7272 |
| TTK | Salubrinal          | 0.032385 | 0.735897 | 7272 |
| TTK | Saracatinib         | -0.03759 | 0.678611 | 7272 |
| TTK | Shikonin            | -0.02908 | 0.61683  | 7272 |
| TTK | Sorafenib           | 0.067454 | 0.519867 | 7272 |
| TTK | Sunitinib           | 0.012154 | 0.902263 | 7272 |
| TTK | T0901317            | -0.04731 | 0.258657 | 7272 |
| TTK | TAE684              | 0.035403 | 0.791265 | 7272 |
| TTK | TAK-715             | -0.08107 | 0.025536 | 7272 |
| TTK | TG101348            | -0.08121 | 0.023873 | 7272 |
| TTK | TGX221              | 0.161307 | 0.007302 | 7272 |
| TTK | THZ-2-102-1         | -0.12266 | 0.000557 | 7272 |
| TTK | THZ-2-49            | -0.02776 | 0.482994 | 7272 |
| TTK | TL-1-85             | -0.09167 | 0.010954 | 7272 |
| TTK | TL-2-105            | -0.0986  | 0.006979 | 7272 |
| TTK | TPCA-1              | -0.09386 | 0.008027 | 7272 |
| TTK | TW 37               | -0.0716  | 0.096247 | 7272 |
| TTK | Talazoparib         | 0.024673 | 0.620682 | 7272 |
| TTK | Tamoxifen           | 0.022898 | 0.868068 | 7272 |
| TTK | Temozolomide        | 0.012177 | 0.898805 | 7272 |
| TTK | Temsirolimus        | -0.00685 | 0.913993 | 7272 |
| TTK | Thapsigargin        | 0.011203 | 0.900962 | 7272 |
| TTK | Tipifarnib          | 0.036302 | 0.600687 | 7272 |
| TTK | Tivozanib           | -0.03613 | 0.551817 | 7272 |

|       |                    |          |          |       |
|-------|--------------------|----------|----------|-------|
| TTK   | Trametinib         | 0.257337 | 9.55E-14 | 7272  |
| TTK   | Tubastatin A       | -0.07083 | 0.050098 | 7272  |
| TTK   | UNC0638            | -0.05118 | 0.158031 | 7272  |
| TTK   | UNC1215            | 0.101221 | 0.023617 | 7272  |
| TTK   | VNLG/124           | -0.00868 | 0.863178 | 7272  |
| TTK   | VX-11e             | 0.1183   | 0.003998 | 7272  |
| TTK   | VX-680             | -0.06125 | 0.517218 | 7272  |
| TTK   | VX-702             | 0.017467 | 0.945864 | 7272  |
| TTK   | Veliparib          | 0.028824 | 0.692956 | 7272  |
| TTK   | Vinblastine        | -0.07424 | 0.080356 | 7272  |
| TTK   | Vinorelbine        | -0.06397 | 0.21314  | 7272  |
| TTK   | Vorinostat         | -0.14792 | 4.11E-05 | 7272  |
| TTK   | WH-4-023           | 0.038259 | 0.656009 | 7272  |
| TTK   | WZ-1-84            | 0.072294 | 0.353153 | 7272  |
| TTK   | WZ3105             | -0.11869 | 0.000733 | 7272  |
| TTK   | XAV939             | 0.015486 | 0.724462 | 7272  |
| TTK   | XL-184             | 0.000858 | 0.989499 | 7272  |
| TTK   | XMD11-85h          | 0.085165 | 0.546089 | 7272  |
| TTK   | XMD13-2            | -0.07388 | 0.041454 | 7272  |
| TTK   | XMD14-99           | 0.040301 | 0.312249 | 7272  |
| TTK   | XMD15-27           | 0.016033 | 0.773673 | 7272  |
| TTK   | XMD8-85            | 0.088221 | 0.255366 | 7272  |
| TTK   | XMD8-92            | 0.007222 | 0.963538 | 7272  |
| TTK   | Y-39983            | -0.08004 | 0.031379 | 7272  |
| TTK   | YK 4-279           | 0.023145 | 0.709015 | 7272  |
| TTK   | YM155              | -0.09683 | 0.030261 | 7272  |
| TTK   | YM201636           | -0.06611 | 0.075171 | 7272  |
| TTK   | Z-LLN1e-CHO        | 0.053811 | 0.492274 | 7272  |
| TTK   | ZG-10              | -0.06314 | 0.341994 | 7272  |
| TTK   | ZM-447439          | -0.06899 | 0.121597 | 7272  |
| TTK   | ZSTK474            | -0.09049 | 0.012259 | 7272  |
| TTK   | Zibotentan         | -0.01527 | 0.968639 | 7272  |
| TTK   | piperlongumine     | 0.027071 | 0.572839 | 7272  |
| TTK   | rTRAIL             | 0.073602 | 0.246262 | 7272  |
| TTK   | selumetinib        | 0.242762 | 8.82E-13 | 7272  |
| UBE2T | (5Z)-7-Oxozeaenol  | 0.184954 | 3.07E-07 | 29089 |
| UBE2T | 17-AAG             | 0.190666 | 1.08E-07 | 29089 |
| UBE2T | 5-Fluorouracil     | -0.03924 | 0.30572  | 29089 |
| UBE2T | 681640             | 0.069463 | 0.223191 | 29089 |
| UBE2T | A-443654           | 0.027911 | 0.9026   | 29089 |
| UBE2T | A-770041           | 0.158449 | 0.019396 | 29089 |
| UBE2T | AC220              | -0.01765 | 0.760436 | 29089 |
| UBE2T | AG-014699          | 0.070102 | 0.092287 | 29089 |
| UBE2T | AICAR              | -0.06626 | 0.098228 | 29089 |
| UBE2T | AKT inhibitor VIII | 0.1318   | 0.001284 | 29089 |
| UBE2T | AMG-706            | 0.079336 | 0.127423 | 29089 |
| UBE2T | AP-24534           | 0.058942 | 0.154751 | 29089 |
| UBE2T | AR-42              | -0.11868 | 0.000801 | 29089 |
| UBE2T | AS601245           | 0.155091 | 0.000311 | 29089 |
| UBE2T | AS605240           | -0.01069 | 0.837134 | 29089 |

|       |                   |          |          |       |
|-------|-------------------|----------|----------|-------|
| UBE2T | AT-7519           | -0.06188 | 0.089438 | 29089 |
| UBE2T | ATRA              | -0.00773 | 0.90165  | 29089 |
| UBE2T | AUY922            | 0.144518 | 0.000597 | 29089 |
| UBE2T | AZ628             | 0.171043 | 0.007143 | 29089 |
| UBE2T | AZD6482           | 0.159759 | 3.04E-05 | 29089 |
| UBE2T | AZD7762           | -0.02638 | 0.549987 | 29089 |
| UBE2T | AZD8055           | 0.021443 | 0.622075 | 29089 |
| UBE2T | Afatinib          | 0.100099 | 0.005658 | 29089 |
| UBE2T | Axitinib          | -0.03424 | 0.542823 | 29089 |
| UBE2T | BAY 61-3606       | 0.041336 | 0.333492 | 29089 |
| UBE2T | BEZ235            | 0.160556 | 7.71E-05 | 29089 |
| UBE2T | BHG712            | 0.012106 | 0.765604 | 29089 |
| UBE2T | BI-2536           | -0.01125 | 0.938442 | 29089 |
| UBE2T | BIRB 0796         | 0.091448 | 0.052314 | 29089 |
| UBE2T | BIX02189          | 0.008288 | 0.845515 | 29089 |
| UBE2T | BMS-509744        | 0.115139 | 0.174182 | 29089 |
| UBE2T | BMS-536924        | 0.027979 | 0.719366 | 29089 |
| UBE2T | BMS-708163        | 0.126843 | 0.000936 | 29089 |
| UBE2T | BMS-754807        | 0.052186 | 0.331266 | 29089 |
| UBE2T | BMS345541         | -0.09142 | 0.010698 | 29089 |
| UBE2T | BX-795            | 0.006309 | 0.917726 | 29089 |
| UBE2T | BX-912            | -0.09161 | 0.009918 | 29089 |
| UBE2T | Belinostat        | -0.09246 | 0.012105 | 29089 |
| UBE2T | Bexarotene        | 0.068085 | 0.264993 | 29089 |
| UBE2T | Bicalutamide      | 0.058671 | 0.180787 | 29089 |
| UBE2T | Bleomycin         | 0.129179 | 0.004013 | 29089 |
| UBE2T | Bleomycin (50 uM) | 0.188099 | 6.77E-08 | 29089 |
| UBE2T | Bortezomib        | 0.155123 | 0.018548 | 29089 |
| UBE2T | Bosutinib         | 0.083928 | 0.070831 | 29089 |
| UBE2T | Bryostatins 1     | 0.102971 | 0.024636 | 29089 |
| UBE2T | CAL-101           | -3.8E-05 | 0.999408 | 29089 |
| UBE2T | CAY10603          | -0.09637 | 0.006924 | 29089 |
| UBE2T | CCT007093         | 0.112524 | 0.005087 | 29089 |
| UBE2T | CCT018159         | 0.062781 | 0.196388 | 29089 |
| UBE2T | CEP-701           | 0.022022 | 0.627328 | 29089 |
| UBE2T | CGP-082996        | 0.061776 | 0.519468 | 29089 |
| UBE2T | CGP-60474         | 0.145151 | 0.039154 | 29089 |
| UBE2T | CH5424802         | -0.03889 | 0.519953 | 29089 |
| UBE2T | CHIR-99021        | 0.158624 | 8.21E-06 | 29089 |
| UBE2T | CI-1040           | 0.154364 | 7.17E-05 | 29089 |
| UBE2T | CMK               | 0.074936 | 0.493018 | 29089 |
| UBE2T | CP466722          | -0.0804  | 0.025505 | 29089 |
| UBE2T | CP724714          | 0.049962 | 0.341803 | 29089 |
| UBE2T | CUDC-101          | -0.09709 | 0.007659 | 29089 |
| UBE2T | CX-5461           | -0.10619 | 0.003222 | 29089 |
| UBE2T | Camptothecin      | -0.03304 | 0.486939 | 29089 |
| UBE2T | Cetuximab         | 0.102512 | 0.008534 | 29089 |
| UBE2T | Cisplatin         | 0.029244 | 0.584478 | 29089 |
| UBE2T | Crizotinib        | 0.003945 | 0.988655 | 29089 |
| UBE2T | Cyclopamine       | 0.111186 | 0.212135 | 29089 |

|       |                    |          |          |       |
|-------|--------------------|----------|----------|-------|
| UBE2T | Cytarabine         | 0.026922 | 0.633728 | 29089 |
| UBE2T | DMOG               | 0.025168 | 0.619544 | 29089 |
| UBE2T | Dabrafenib         | 0.152158 | 6.46E-05 | 29089 |
| UBE2T | Dasatinib          | 0.209952 | 0.000417 | 29089 |
| UBE2T | Docetaxel          | 0.170059 | 3.08E-06 | 29089 |
| UBE2T | Doxorubicin        | 0.071412 | 0.201053 | 29089 |
| UBE2T | EHT 1864           | 0.037675 | 0.582995 | 29089 |
| UBE2T | EKB-569            | 0.00402  | 0.934703 | 29089 |
| UBE2T | EX-527             | 0.022556 | 0.856192 | 29089 |
| UBE2T | Elesclomol         | 0.050668 | 0.259899 | 29089 |
| UBE2T | Embelin            | 0.062895 | 0.242423 | 29089 |
| UBE2T | Epothilone B       | 0.099524 | 0.029347 | 29089 |
| UBE2T | Erlotinib          | 0.103929 | 0.143568 | 29089 |
| UBE2T | Etoposide          | -0.05067 | 0.283044 | 29089 |
| UBE2T | FH535              | 0.080857 | 0.066738 | 29089 |
| UBE2T | FK866              | -0.1618  | 4.05E-06 | 29089 |
| UBE2T | FMK                | 0.054055 | 0.403169 | 29089 |
| UBE2T | FR-180204          | 0.039661 | 0.459748 | 29089 |
| UBE2T | FTI-277            | 0.177561 | 3.66E-06 | 29089 |
| UBE2T | Foretinib          | -0.01448 | 0.767535 | 29089 |
| UBE2T | GDC0449            | 0.075026 | 0.34838  | 29089 |
| UBE2T | GDC0941            | 0.064504 | 0.205071 | 29089 |
| UBE2T | GNF-2              | -0.00259 | 0.995323 | 29089 |
| UBE2T | GSK-650394         | 0.034857 | 0.649914 | 29089 |
| UBE2T | GSK1070916         | -0.15203 | 1.8E-05  | 29089 |
| UBE2T | GSK1904529A        | 0.078426 | 0.072903 | 29089 |
| UBE2T | GSK2126458         | -0.04056 | 0.301928 | 29089 |
| UBE2T | GSK269962A         | 0.084478 | 0.056025 | 29089 |
| UBE2T | GSK429286A         | -0.03263 | 0.463965 | 29089 |
| UBE2T | GSK690693          | -0.10029 | 0.005691 | 29089 |
| UBE2T | GW 441756          | -0.00618 | 0.990735 | 29089 |
| UBE2T | GW-2580            | 0.032369 | 0.938845 | 29089 |
| UBE2T | GW843682X          | -0.03565 | 0.723572 | 29089 |
| UBE2T | Gefitinib          | 0.107752 | 0.006444 | 29089 |
| UBE2T | Gemcitabine        | -0.00097 | 0.98903  | 29089 |
| UBE2T | Genentech Cpd 10   | -0.0995  | 0.006024 | 29089 |
| UBE2T | HG-5-113-01        | 0.001033 | 0.992354 | 29089 |
| UBE2T | HG-5-88-01         | 0.078127 | 0.513772 | 29089 |
| UBE2T | HG-6-64-1          | 0.18243  | 2.7E-06  | 29089 |
| UBE2T | I-BET-762          | -0.08685 | 0.01356  | 29089 |
| UBE2T | IOX2               | 0.051752 | 0.358021 | 29089 |
| UBE2T | IPA-3              | -0.00805 | 0.86412  | 29089 |
| UBE2T | Imatinib           | -0.01827 | 0.923845 | 29089 |
| UBE2T | Ispinesib Mesylate | -0.04229 | 0.269898 | 29089 |
| UBE2T | JNJ-26854165       | 0.121972 | 0.004609 | 29089 |
| UBE2T | JNK Inhibitor VIII | 0.065035 | 0.123975 | 29089 |
| UBE2T | JNK-9L             | 0.095201 | 0.044988 | 29089 |
| UBE2T | JQ1                | 0.064659 | 0.120649 | 29089 |
| UBE2T | JQ12               | 0.020004 | 0.749947 | 29089 |
| UBE2T | JW-7-24-1          | -0.062   | 0.089175 | 29089 |



|       |                    |          |          |       |
|-------|--------------------|----------|----------|-------|
| UBE2T | JW-7-52-1          | 0.149043 | 0.052057 | 29089 |
| UBE2T | KIN001-055         | 0.039769 | 0.534504 | 29089 |
| UBE2T | KIN001-102         | -0.10111 | 0.004201 | 29089 |
| UBE2T | KIN001-135         | 0.056893 | 0.591865 | 29089 |
| UBE2T | KIN001-236         | -0.01768 | 0.668322 | 29089 |
| UBE2T | KIN001-244         | -0.03588 | 0.356013 | 29089 |
| UBE2T | KIN001-260         | -0.01494 | 0.715186 | 29089 |
| UBE2T | KIN001-266         | -0.01747 | 0.749117 | 29089 |
| UBE2T | KIN001-270         | -0.05034 | 0.210504 | 29089 |
| UBE2T | KU-55933           | 0.022518 | 0.757193 | 29089 |
| UBE2T | LAQ824             | -0.05039 | 0.215261 | 29089 |
| UBE2T | LFM-A13            | 0.096036 | 0.036251 | 29089 |
| UBE2T | LY317615           | -0.01678 | 0.739873 | 29089 |
| UBE2T | Lapatinib          | 0.138475 | 0.022405 | 29089 |
| UBE2T | Lenalidomide       | -0.02596 | 0.770724 | 29089 |
| UBE2T | Linifanib          | 0.032449 | 0.55905  | 29089 |
| UBE2T | Lisitinib          | 0.030149 | 0.671054 | 29089 |
| UBE2T | MG-132             | 0.120241 | 0.109912 | 29089 |
| UBE2T | MK-2206            | 0.003581 | 0.960673 | 29089 |
| UBE2T | MLN4924            | 0.12044  | 0.016522 | 29089 |
| UBE2T | MP470              | -0.11469 | 0.005757 | 29089 |
| UBE2T | MPS-1-IN-1         | -0.07049 | 0.0618   | 29089 |
| UBE2T | MS-275             | -0.12363 | 0.087923 | 29089 |
| UBE2T | Masitinib          | -0.02452 | 0.552197 | 29089 |
| UBE2T | Methotrexate       | -0.07828 | 0.035968 | 29089 |
| UBE2T | Midostaurin        | 0.130738 | 0.001124 | 29089 |
| UBE2T | Mitomycin C        | -0.03543 | 0.51489  | 29089 |
| UBE2T | NG-25              | -0.02509 | 0.521199 | 29089 |
| UBE2T | NPK76-II-72-1      | -0.16765 | 1.01E-06 | 29089 |
| UBE2T | NSC-207895         | -0.10951 | 0.006449 | 29089 |
| UBE2T | NSC-87877          | 0.087996 | 0.085426 | 29089 |
| UBE2T | NU-7441            | 0.078088 | 0.195891 | 29089 |
| UBE2T | Navitoclax         | -0.20975 | 3.96E-09 | 29089 |
| UBE2T | Nilotinib          | -0.02247 | 0.704667 | 29089 |
| UBE2T | Nutlin-3a (-)      | 0.108918 | 0.010113 | 29089 |
| UBE2T | OSI-027            | -0.0621  | 0.0916   | 29089 |
| UBE2T | OSI-930            | 0.001992 | 0.967544 | 29089 |
| UBE2T | OSU-03012          | 0.064969 | 0.167228 | 29089 |
| UBE2T | Obatoclax Mesylate | 0.060245 | 0.190199 | 29089 |
| UBE2T | Olaparib           | 0.064511 | 0.131941 | 29089 |
| UBE2T | PAC-1              | -0.02925 | 0.526488 | 29089 |
| UBE2T | PD-0325901         | 0.211559 | 9.65E-09 | 29089 |
| UBE2T | PD-0332991         | 0.110357 | 0.016059 | 29089 |
| UBE2T | PD-173074          | 0.011712 | 0.957247 | 29089 |
| UBE2T | PF-4708671         | 0.084778 | 0.298798 | 29089 |
| UBE2T | PF-562271          | 0.107929 | 0.025474 | 29089 |
| UBE2T | PFI-1              | 0.116108 | 0.005854 | 29089 |
| UBE2T | PHA-665752         | 0.08294  | 0.547454 | 29089 |
| UBE2T | PHA-793887         | -0.08215 | 0.020401 | 29089 |
| UBE2T | PI-103             | -0.08855 | 0.014144 | 29089 |

|       |                     |          |          |       |
|-------|---------------------|----------|----------|-------|
| UBE2T | PIK-93              | -0.07469 | 0.036928 | 29089 |
| UBE2T | PLX4720             | 0.106731 | 0.005282 | 29089 |
| UBE2T | Paclitaxel          | 0.097309 | 0.298357 | 29089 |
| UBE2T | Parthenolide        | 0.012144 | 0.928485 | 29089 |
| UBE2T | Pazopanib           | 0.095648 | 0.044414 | 29089 |
| UBE2T | Phenformin          | -0.05381 | 0.15702  | 29089 |
| UBE2T | Pyrimethamine       | 0.01505  | 0.91801  | 29089 |
| UBE2T | QL-VIII-58          | 0.154679 | 0.010552 | 29089 |
| UBE2T | QL-X-138            | -0.08915 | 0.014484 | 29089 |
| UBE2T | QL-XI-92            | -0.0749  | 0.039545 | 29089 |
| UBE2T | QL-XII-47           | -0.04573 | 0.265808 | 29089 |
| UBE2T | QL-XII-61           | -0.03222 | 0.672069 | 29089 |
| UBE2T | QS11                | -0.02833 | 0.680005 | 29089 |
| UBE2T | RDEA119             | 0.24305  | 7.51E-13 | 29089 |
| UBE2T | RO-3306             | 0.094027 | 0.021094 | 29089 |
| UBE2T | Rapamycin           | 0.06797  | 0.554192 | 29089 |
| UBE2T | Roscovitine         | 0.151732 | 0.209241 | 29089 |
| UBE2T | Ruxolitinib         | -0.02205 | 0.710039 | 29089 |
| UBE2T | S-Trityl-L-cysteine | 0.01525  | 0.883214 | 29089 |
| UBE2T | SB 216763           | 0.081764 | 0.084784 | 29089 |
| UBE2T | SB 505124           | 0.068884 | 0.292188 | 29089 |
| UBE2T | SB52334             | -0.06364 | 0.151282 | 29089 |
| UBE2T | SB590885            | 0.135171 | 0.001258 | 29089 |
| UBE2T | SGC0946             | 0.050452 | 0.330255 | 29089 |
| UBE2T | SL 0101-1           | 0.083593 | 0.254436 | 29089 |
| UBE2T | SN-38               | 0.050784 | 0.249895 | 29089 |
| UBE2T | SNX-2112            | -0.03024 | 0.43982  | 29089 |
| UBE2T | STF-62247           | 0.004066 | 0.936269 | 29089 |
| UBE2T | Salubrinal          | 0.05135  | 0.563842 | 29089 |
| UBE2T | Saracatinib         | 0.094458 | 0.234423 | 29089 |
| UBE2T | Shikonin            | 0.035758 | 0.523915 | 29089 |
| UBE2T | Sorafenib           | 0.056213 | 0.616225 | 29089 |
| UBE2T | Sunitinib           | 0.06106  | 0.42962  | 29089 |
| UBE2T | T0901317            | -0.01922 | 0.676524 | 29089 |
| UBE2T | TAE684              | 0.031859 | 0.814106 | 29089 |
| UBE2T | TAK-715             | -0.05612 | 0.130718 | 29089 |
| UBE2T | TG101348            | -0.05995 | 0.101585 | 29089 |
| UBE2T | TGX221              | 0.265082 | 2.9E-06  | 29089 |
| UBE2T | THZ-2-102-1         | -0.09932 | 0.005689 | 29089 |
| UBE2T | THZ-2-49            | -0.01401 | 0.736002 | 29089 |
| UBE2T | TL-1-85             | -0.01387 | 0.734308 | 29089 |
| UBE2T | TL-2-105            | -0.08297 | 0.024738 | 29089 |
| UBE2T | TPCA-1              | -0.07437 | 0.037851 | 29089 |
| UBE2T | TW 37               | -0.00519 | 0.93225  | 29089 |
| UBE2T | Talazoparib         | 0.006941 | 0.900492 | 29089 |
| UBE2T | Tamoxifen           | 0.089019 | 0.285036 | 29089 |
| UBE2T | Temozolomide        | 0.033806 | 0.652801 | 29089 |
| UBE2T | Temsirolimus        | 0.100333 | 0.019435 | 29089 |
| UBE2T | Thapsigargin        | 0.036423 | 0.591594 | 29089 |
| UBE2T | Tipifarnib          | 0.086512 | 0.106405 | 29089 |

|       |                |          |          |       |
|-------|----------------|----------|----------|-------|
| UBE2T | Tivozanib      | 0.007995 | 0.917713 | 29089 |
| UBE2T | Trametinib     | 0.285657 | 0        | 29089 |
| UBE2T | Tubastatin A   | -0.06964 | 0.054199 | 29089 |
| UBE2T | UNC0638        | -0.05815 | 0.106318 | 29089 |
| UBE2T | UNC1215        | 0.092811 | 0.040334 | 29089 |
| UBE2T | VNLG/124       | 0.017306 | 0.719141 | 29089 |
| UBE2T | VX-11e         | 0.104756 | 0.012328 | 29089 |
| UBE2T | VX-680         | -0.02103 | 0.859654 | 29089 |
| UBE2T | VX-702         | 0.023455 | 0.926443 | 29089 |
| UBE2T | Veliparib      | 0.04449  | 0.516011 | 29089 |
| UBE2T | Vinblastine    | 0.0615   | 0.157398 | 29089 |
| UBE2T | Vinorelbine    | 0.038    | 0.50577  | 29089 |
| UBE2T | Vorinostat     | -0.1725  | 1.49E-06 | 29089 |
| UBE2T | WH-4-023       | 0.215685 | 0.000815 | 29089 |
| UBE2T | WZ-1-84        | 0.169103 | 0.011247 | 29089 |
| UBE2T | WZ3105         | -0.11028 | 0.001766 | 29089 |
| UBE2T | XAV939         | 0.090688 | 0.017608 | 29089 |
| UBE2T | XL-184         | 0.054888 | 0.231433 | 29089 |
| UBE2T | XMD11-85h      | 0.088335 | 0.522152 | 29089 |
| UBE2T | XMD13-2        | -0.05215 | 0.159123 | 29089 |
| UBE2T | XMD14-99       | -0.02341 | 0.575831 | 29089 |
| UBE2T | XMD15-27       | -0.01106 | 0.848861 | 29089 |
| UBE2T | XMD8-85        | 0.148731 | 0.0317   | 29089 |
| UBE2T | XMD8-92        | 0.114053 | 0.177839 | 29089 |
| UBE2T | Y-39983        | -0.0378  | 0.340141 | 29089 |
| UBE2T | YK 4-279       | 0.123664 | 0.006237 | 29089 |
| UBE2T | YM155          | -0.03679 | 0.498203 | 29089 |
| UBE2T | YM201636       | -0.0783  | 0.033041 | 29089 |
| UBE2T | Z-LLN1e-CHO    | 0.168045 | 0.007663 | 29089 |
| UBE2T | ZG-10          | 0.005039 | 0.956248 | 29089 |
| UBE2T | ZM-447439      | -0.04351 | 0.363768 | 29089 |
| UBE2T | ZSTK474        | -0.05463 | 0.142552 | 29089 |
| UBE2T | Zibotentan     | 0.060052 | 0.725079 | 29089 |
| UBE2T | piperlongumine | 0.126455 | 0.001117 | 29089 |
| UBE2T | rTRAIL         | 0.051828 | 0.463516 | 29089 |
| UBE2T | selumetinib    | 0.247458 | 2.93E-13 | 29089 |

Symbol:Name of gene

Drug:Name of drug

Cor:Correlation coefficient

Fdr:False Discovery Rate

Entrez:Gene ID in NCBI database
