# Supplementary material for: Identification of the molecular subtypes and construction of risk models in neuroblastoma
Source: PubMed Central journal article supplement (PMC10362029; doi:10.1038/s41598-023-35401-3), 2023-07-21
Supplement: 41598_2023_35401_MOESM2_ESM.pdf [file 41598_2023_35401_MOESM2_ESM.pdf]

# Scientific reports

## Supplementary Materials for Identification of the molecular subtypes and Construction of risk models in neuroblastoma

Enyang He, Bowen Shi, Ziyu Liu, Kaili Chang, Hailan Zhao, Wei Zhao, and Hualei Cui  
Correspondence should be addressed to Hualei Cui; [chlyfjp@163.com](mailto:chlyfjp@163.com)

### **The PDF file includes:**

Supplementary Figures: S1 to S8.

Supplementary Tables: T1 to T2.

**Additional notes:** The module gene results obtained from the WGCNA analysis and the results from the GDSC database analysis are uploaded as separate PDF files as supplementary material due to the size of the files. The file names of the PDFs are GDSC\_IC50 and WGCNAmodulegene respectively.

# Supplementary Figure S1

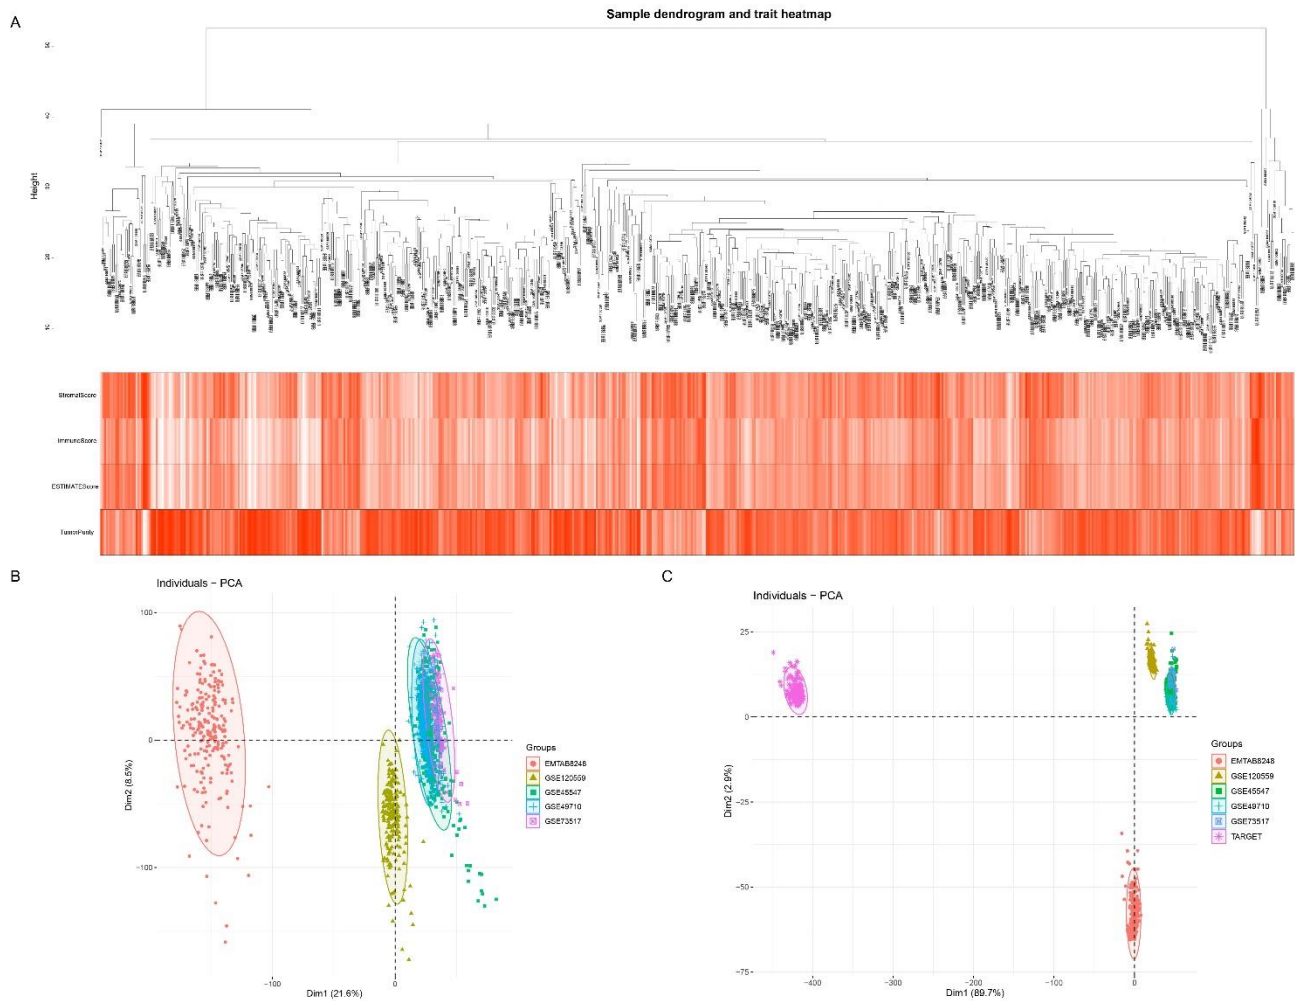

Supplementary Figure S1: Processing of data.

(S1A) From all the sample clusters, there are no outliers or abnormal values. Clustering dendrogram of samples based on their Euclidean distance.

(S1B, C) Principal component analysis (PCA) of the gene expression in datasets. The visualization of patients by scatter plots were based on the top two Dims of gene expression profiles without the removal of batch effect.

## Supplementary Figure S2

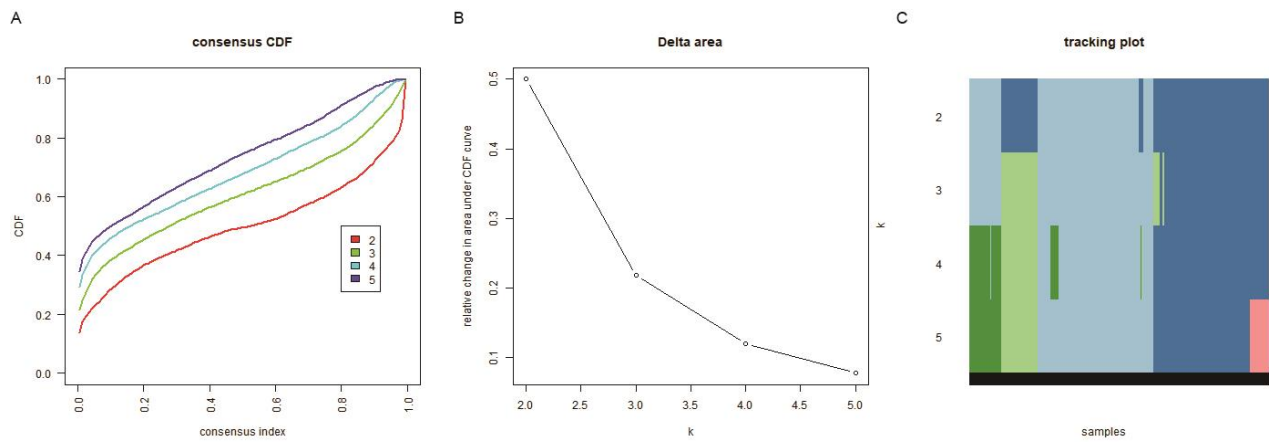

Supplementary Figure S2: The evidence for determining K values by cluster analysis.

(S2A) Consensus CDF with cluster count ( $k$ ) =2–5.

(S2B) Relative alterations in the area under CDF curve with cluster count ( $k$ ) =2–5.

(S2C) Tracking plot showing the sample classification with cluster count ( $k$ ) =2–5.

# Supplementary Figure S3

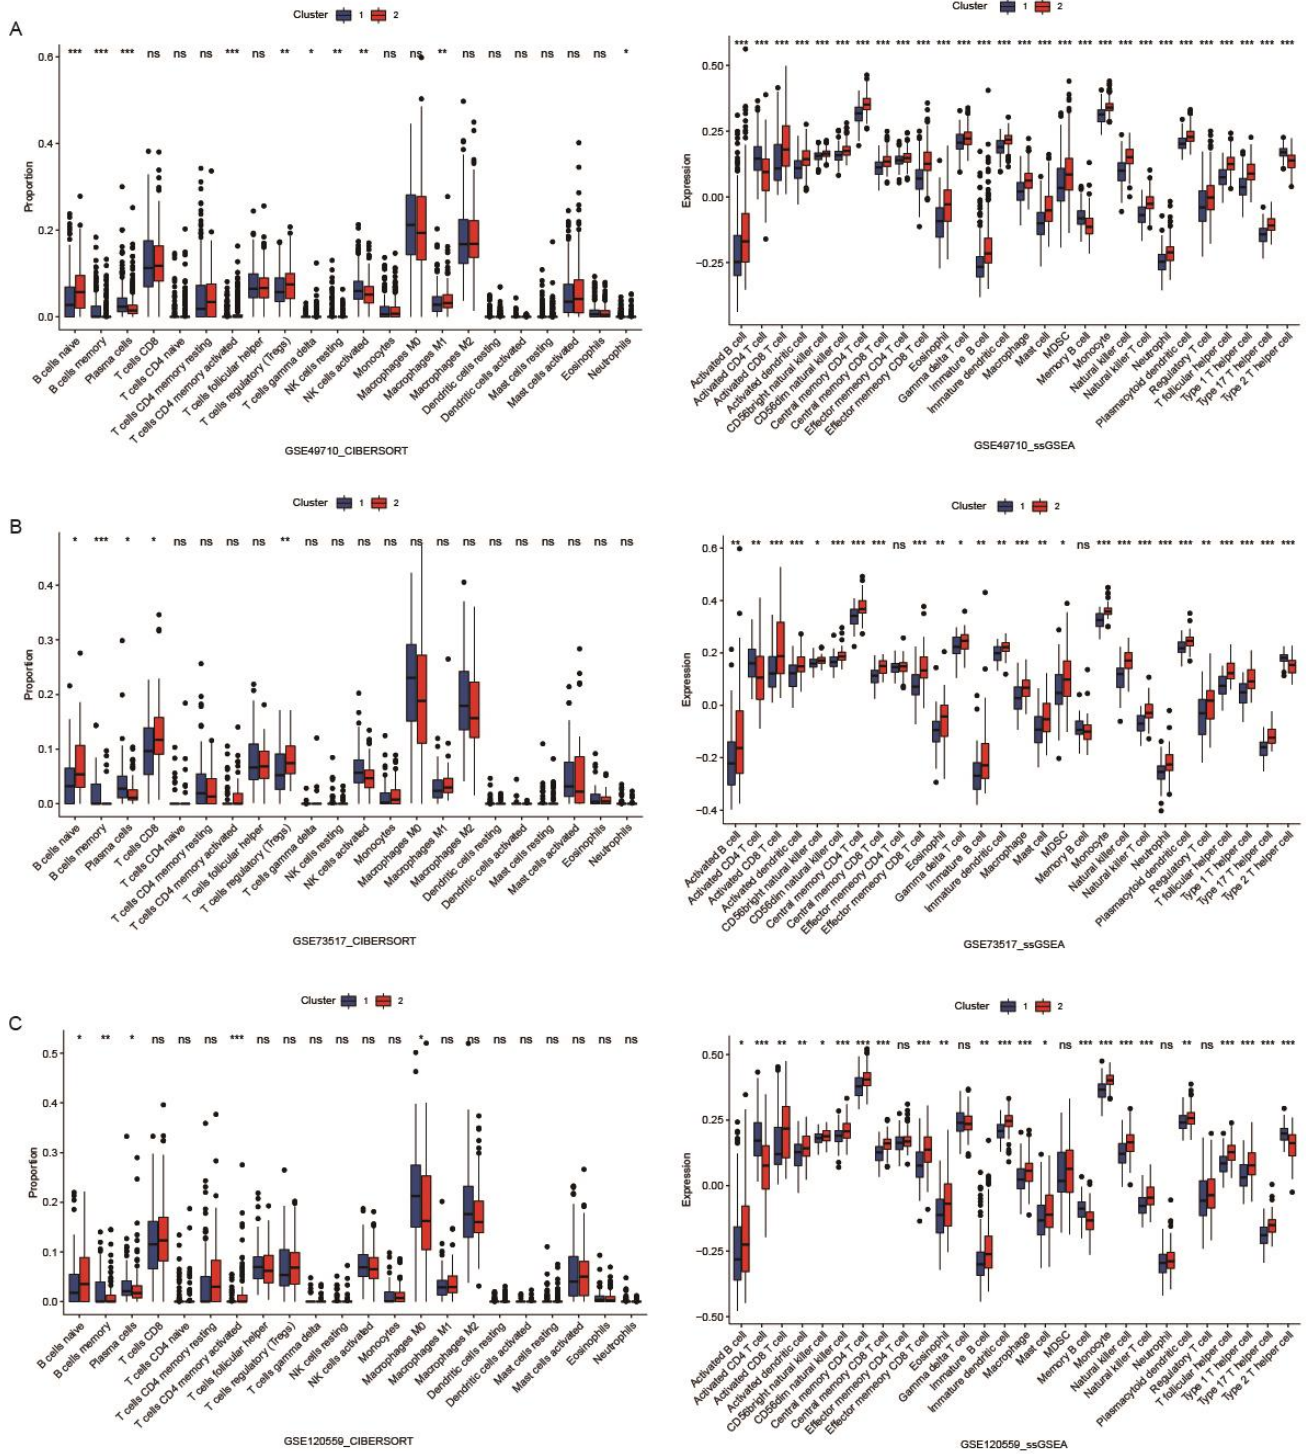

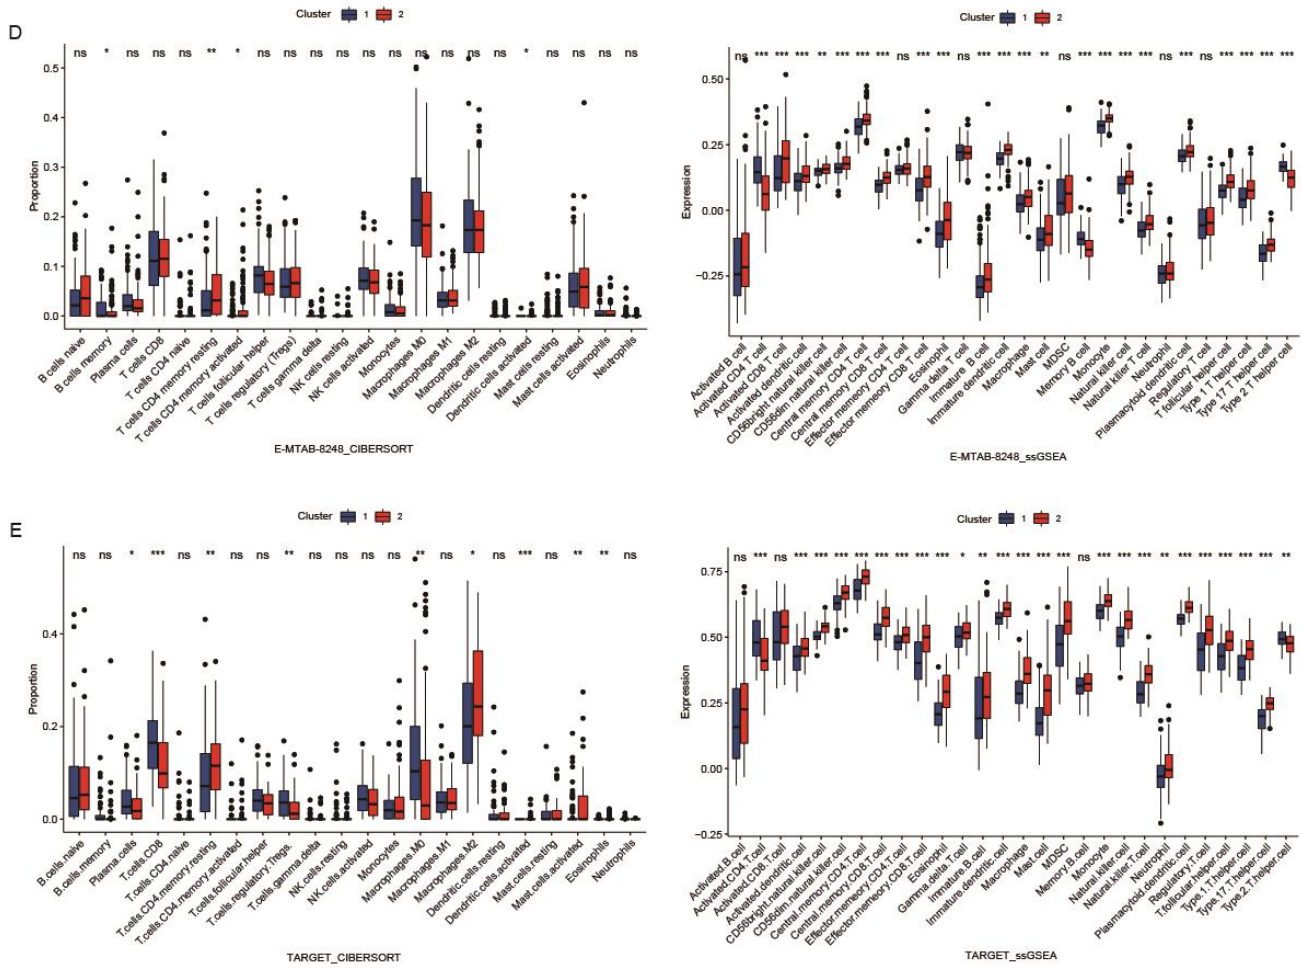

Supplementary Figure S3: Results of the immunity analysis for different clusters using different algorithms. (S3A) Box plot of the distribution of immune cell expression between the two clusters as calculated by the the CIBERSORT algorithm and ssGSEA algorithm in GSE49710 dataset. (\*:  $P < 0.05$ ; \*\*:  $P < 0.01$ ; \*\*\*:  $P < 0.001$ ). (S3B) Box plot of the distribution of immune cell expression between the two clusters as calculated by the the CIBERSORT algorithm and ssGSEA algorithm in GSE73517 dataset. (\*:  $P < 0.05$ ; \*\*:  $P < 0.01$ ; \*\*\*:  $P < 0.001$ ). (S3C) Box plot of the distribution of immune cell expression between the two clusters as calculated by the the CIBERSORT algorithm and ssGSEA algorithm in GSE120559 dataset. (\*:  $P < 0.05$ ; \*\*:  $P < 0.01$ ; \*\*\*:  $P < 0.001$ ). (S3D) Box plot of the distribution of immune cell expression between the two clusters as calculated by the the CIBERSORT algorithm and ssGSEA algorithm in E-MTAB-8248 dataset. (\*:  $P < 0.05$ ; \*\*:  $P < 0.01$ ; \*\*\*:  $P < 0.001$ ). (S3E) Box plot of the distribution of immune cell expression between the two clusters as calculated by the the CIBERSORT algorithm and ssGSEA algorithm in TARGET dataset. (\*:  $P < 0.05$ ; \*\*:  $P < 0.01$ ; \*\*\*:  $P < 0.001$ ).

# Supplementary Figure S4

A

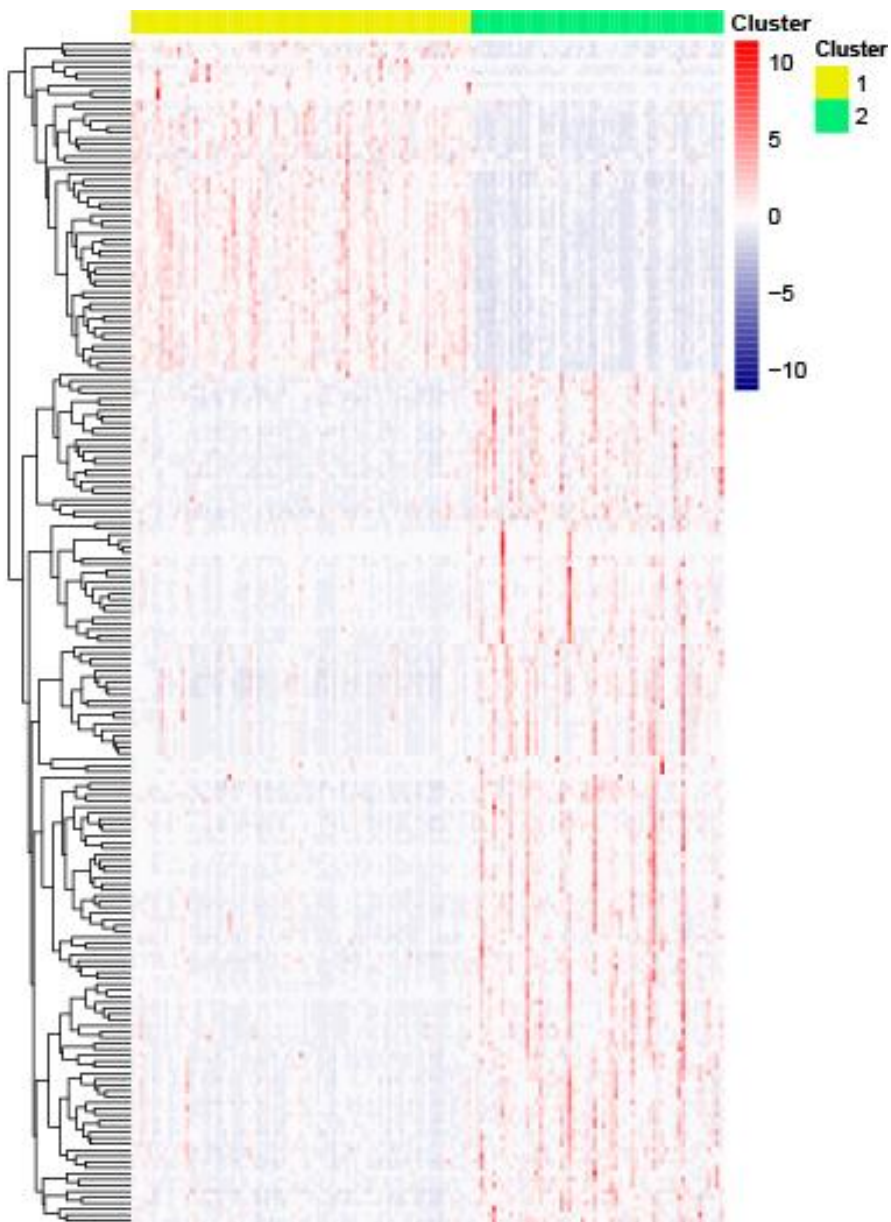

B

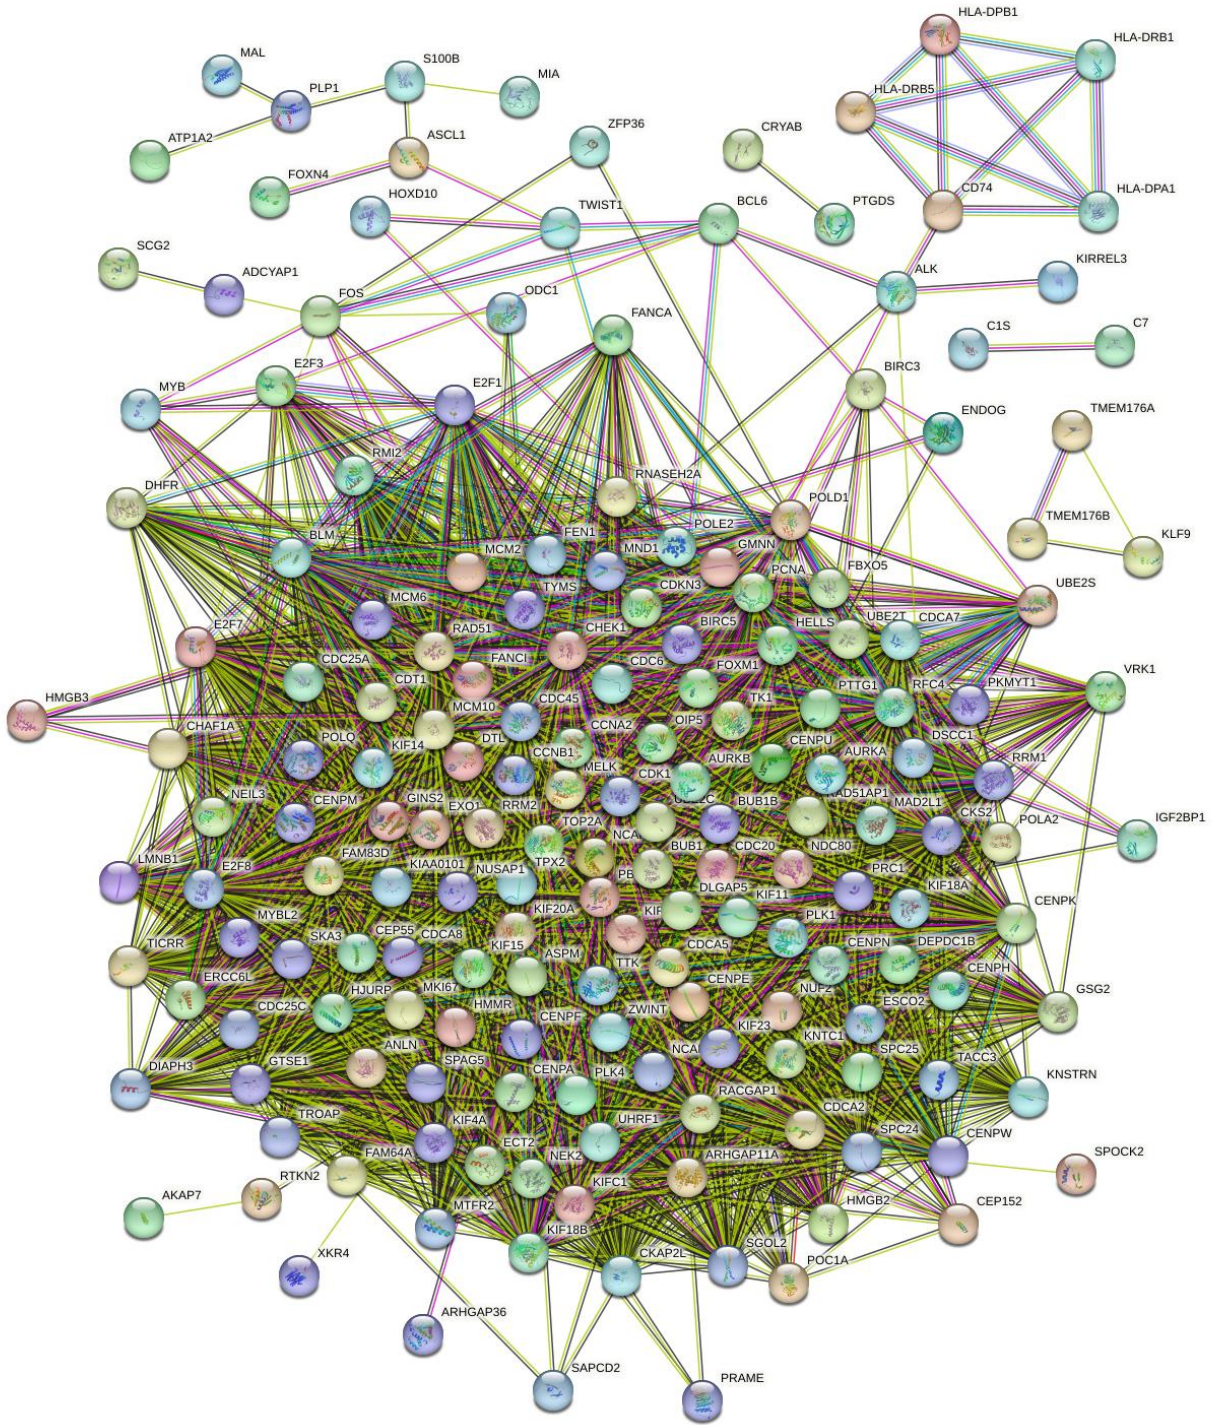

Supplementary Figure S4: Identification of differentially expressed genes.

(S4A) Heatmap showed differential gene expression in TARGET dataset. The genes shown in the heat map were the top 200 genes with the largest Median absolute deviation of gene expression.

(S4B) PPI network (206 DEGs) based on STRING database.

## Supplementary Figure S5

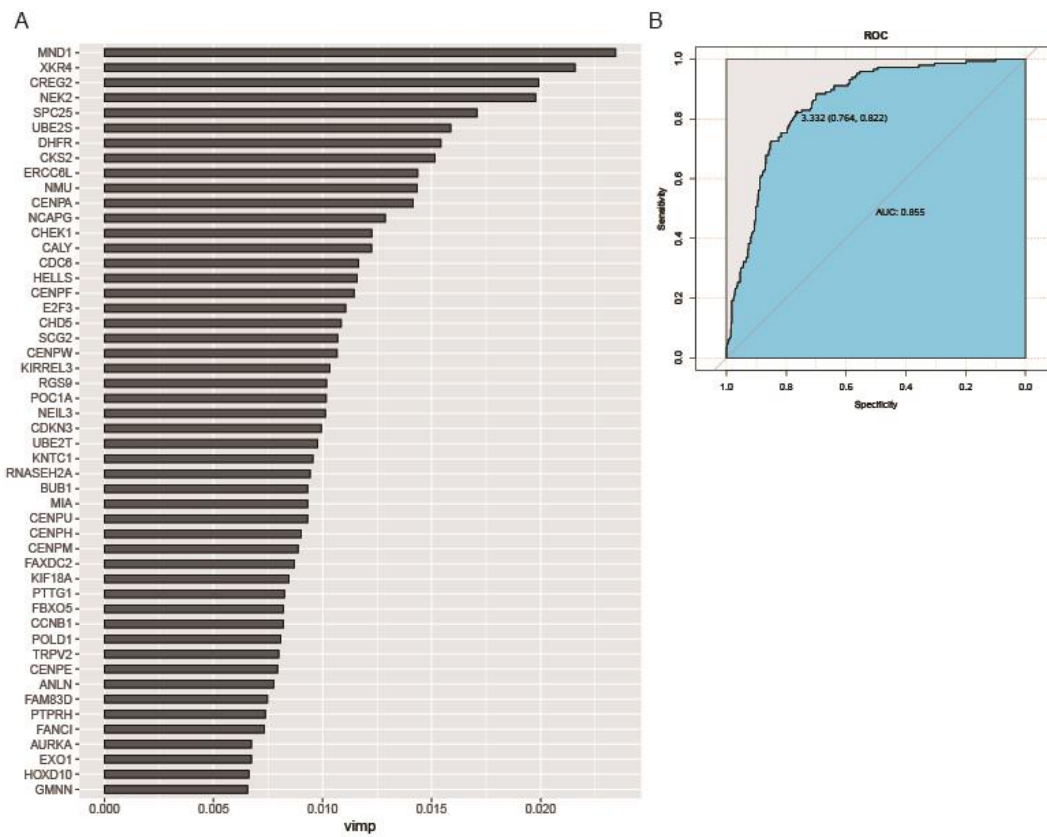

Supplementary Figure S5: Filtering for key genes and determining cut-off values.

(S5A) The bar chart showed the TOP 50 genes ranked according to the VIMP algorithm.

(S5B) Based on the ROC curves, we determined the optimal cutoff values for high and low risk groups.



# Supplementary Figure S6

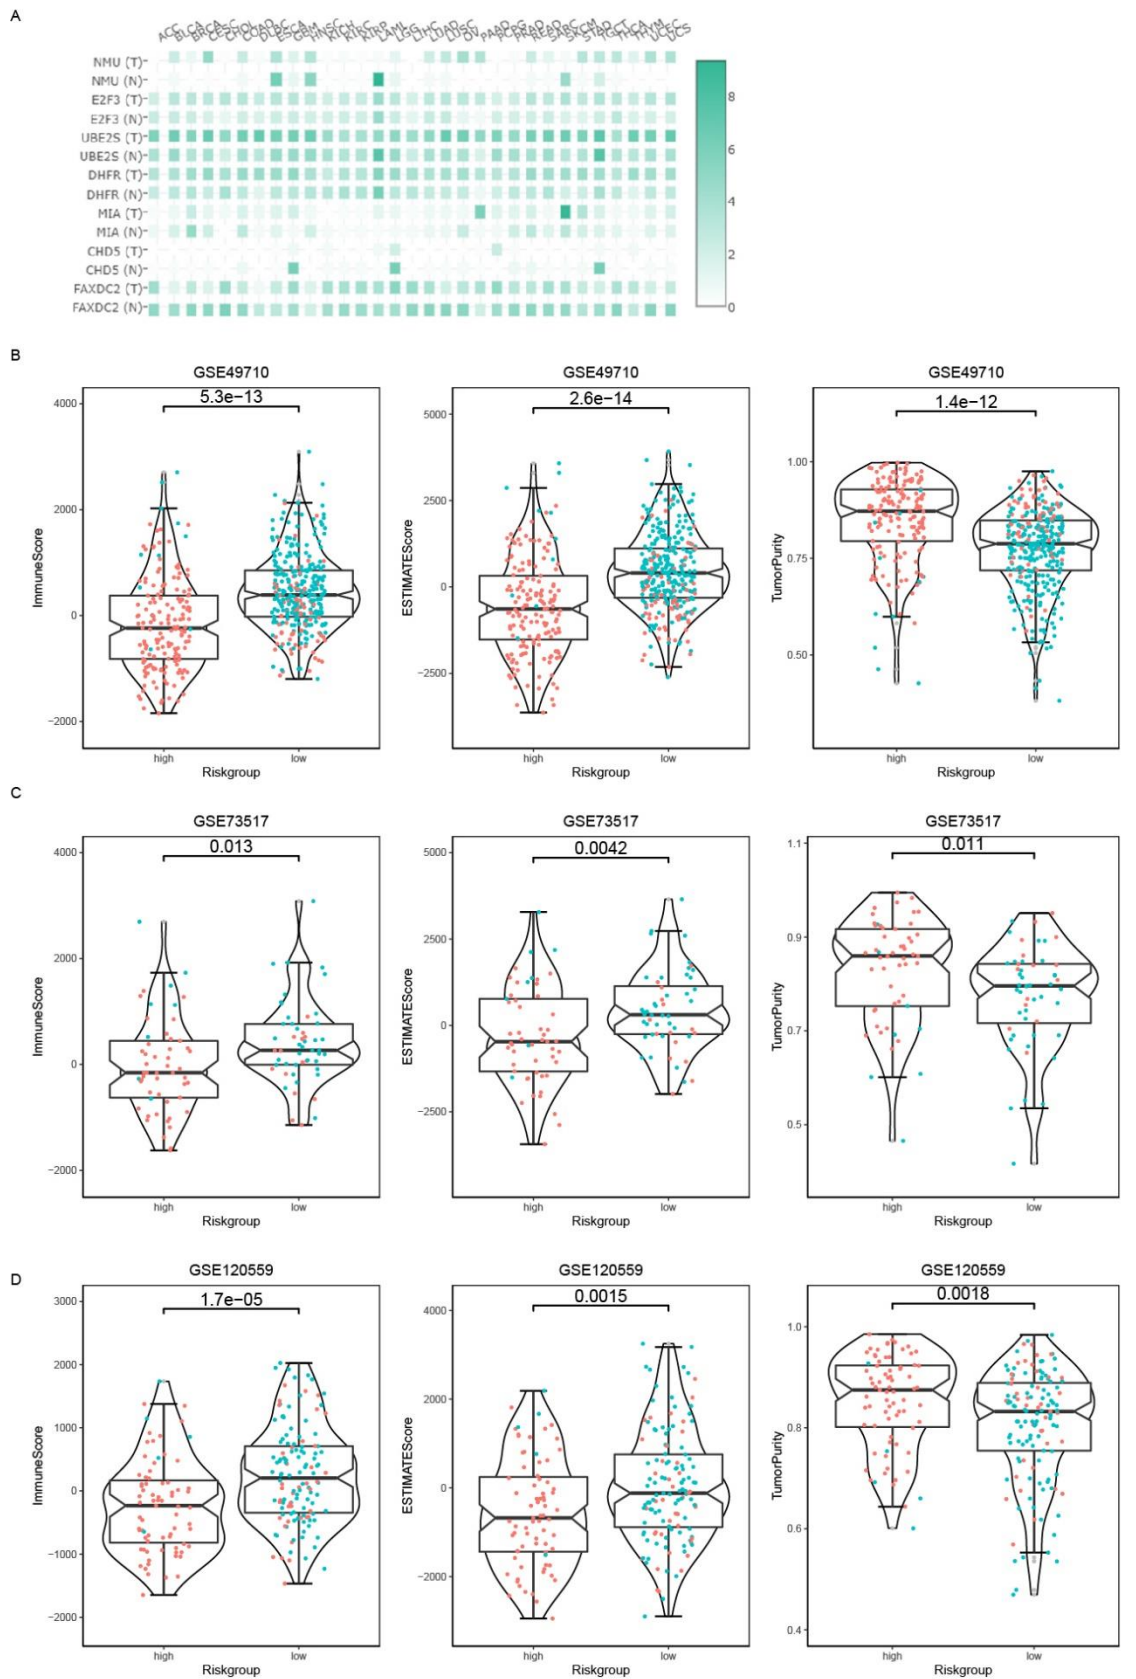

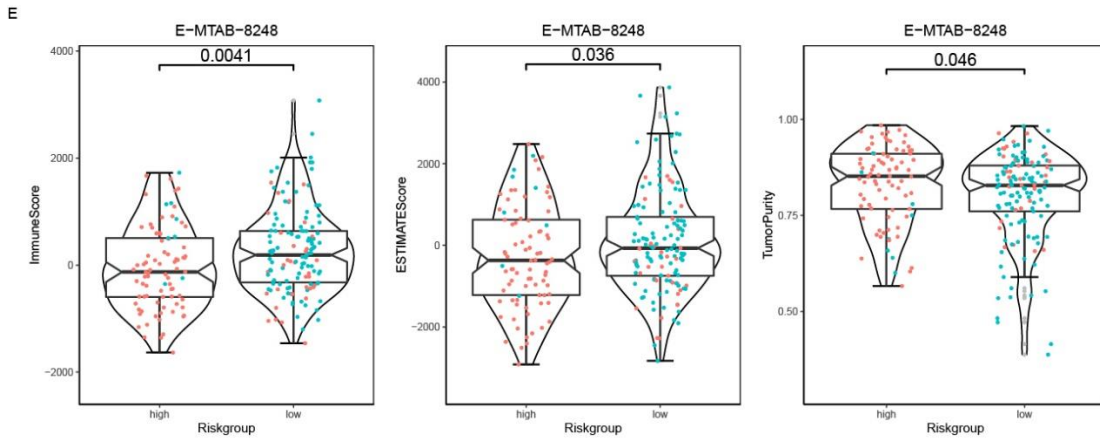

Supplementary Figure S6: The result of ESTIMATE algorithms in high and low risk groupings across different datasets.

(S6A) Expression of 7 risk score model genes in multiple tumors.

(S6B-E) Distribution of Immune Score, ESTIMATE Score, and Tumor Purity in high and low risk groups in the GSE49710 dataset (B), GSE73517 dataset (C), GSE120559 dataset (D) and E-MTAB-8248 dataset (E). Red dots represented patients belonging to Cluster 1, green dots represented patients belonging to Cluster 2.

# Supplementary Figure S7

A

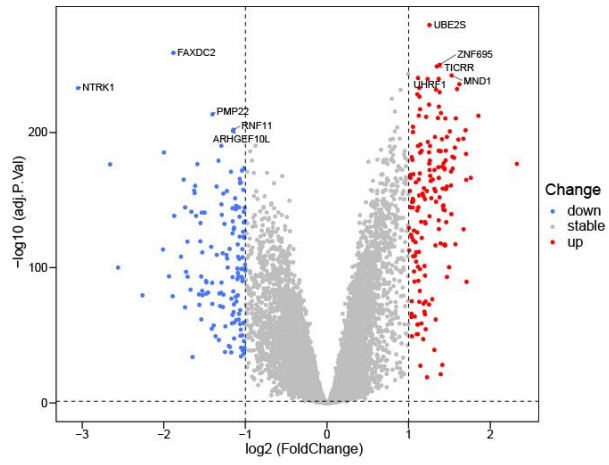

B

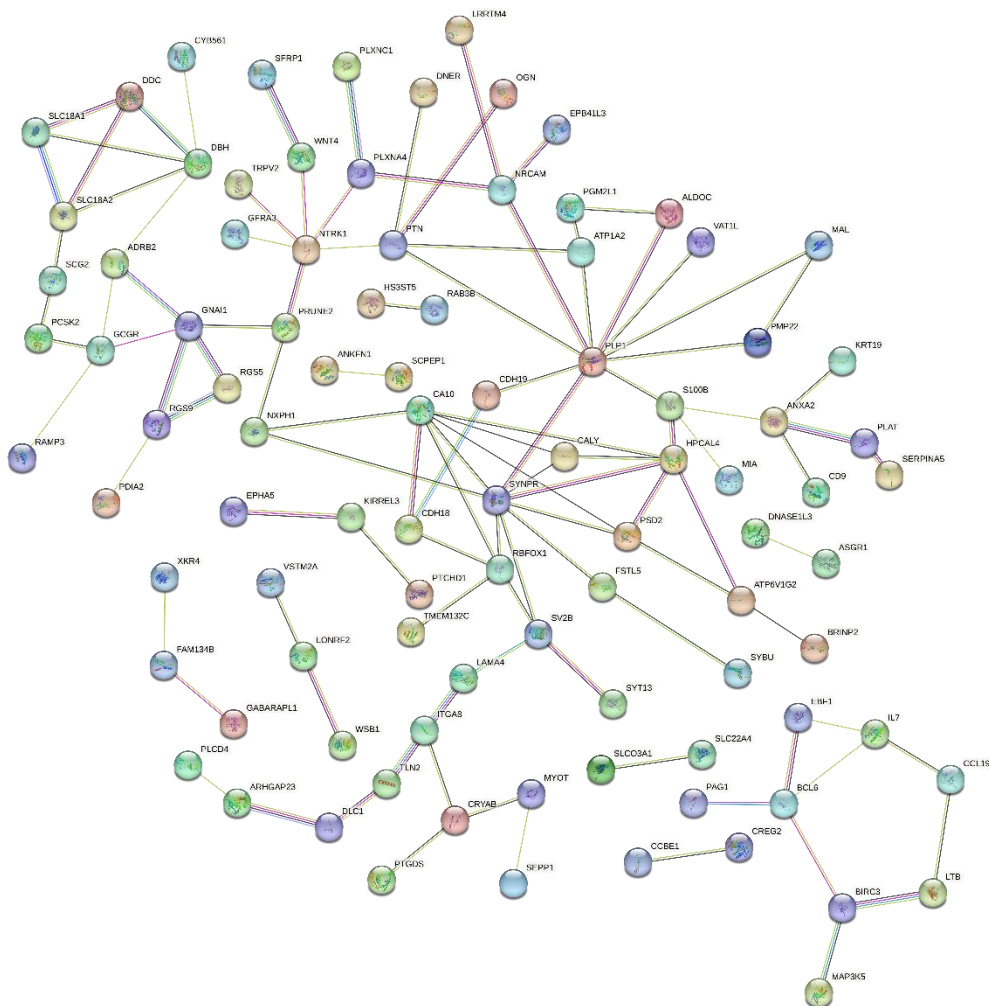

C

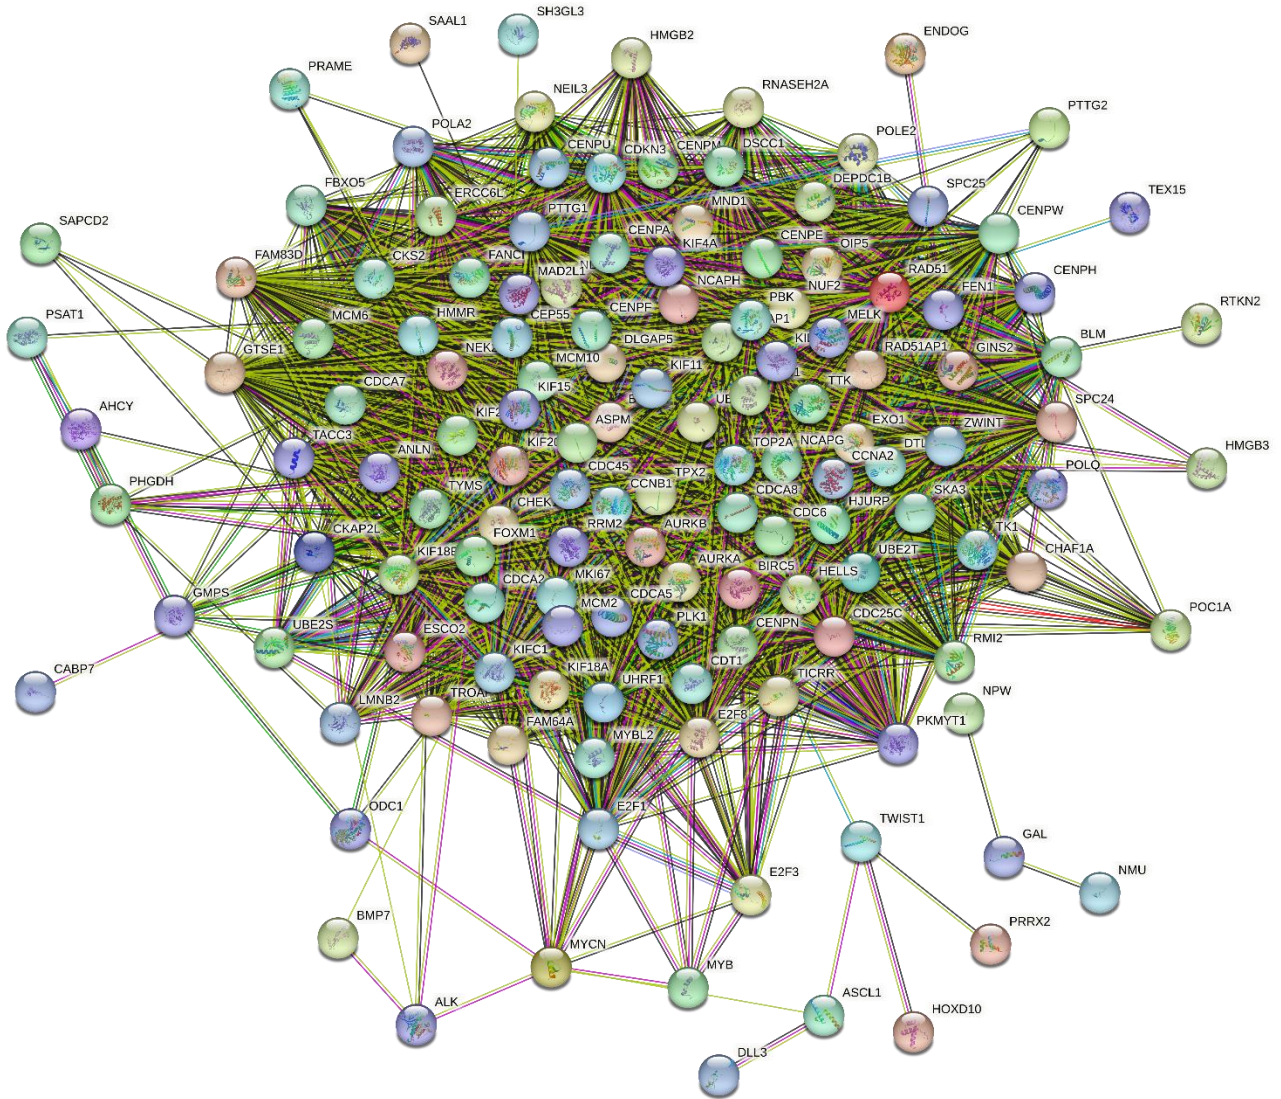

Supplementary Figure S7: Identification of differential expressed genes between risk subgroups. (S7A) Volcano plot depicted the distribution of DEGs in 5 microarray datasets between the two risk groups. and labeled the top 5 genes with the smallest ranking according to adjusted p-value. (S7B) PPI network (146 down DEGs) based on STRING database. (S7C) PPI network (168 up DEGs) based on STRING database.

## Supplementary Figure S8

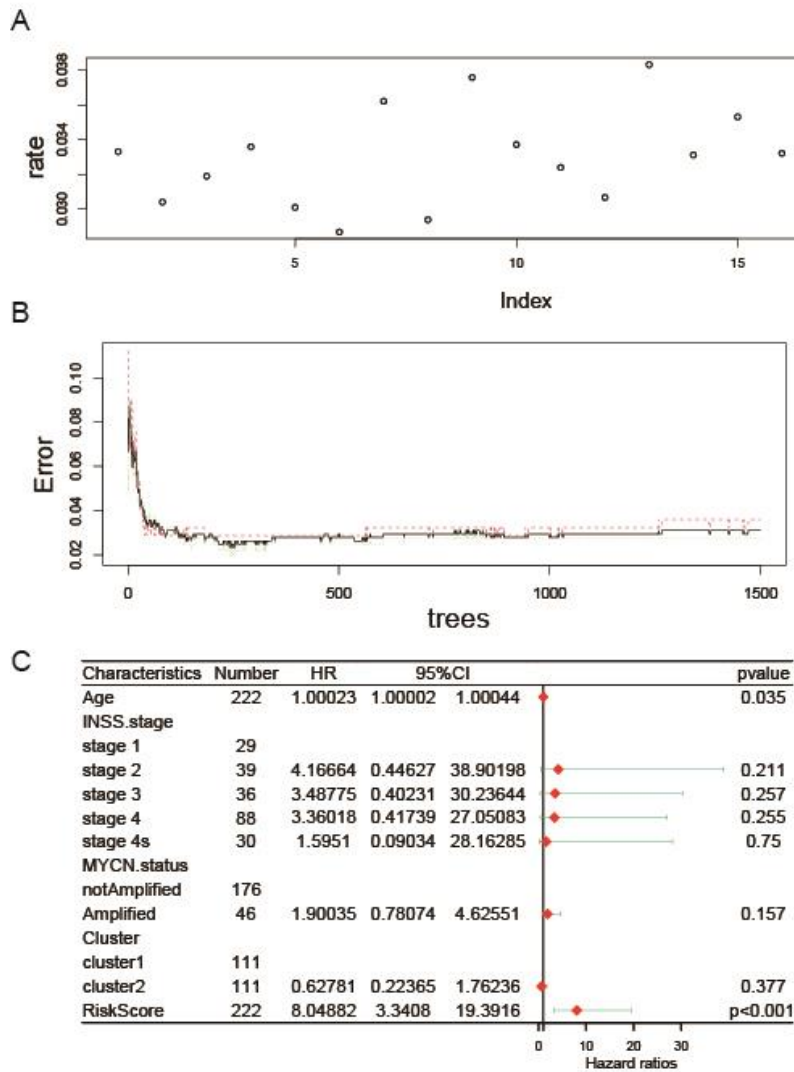

Supplementary Figure S8: Filtering of model parameters and forest plots for different characteristics.

(S8A) The scatter plot showed the relationship between the model error rate and mtry (1-20). The rate has the minimum value when mtry=6.

(S8B) The line graph showed the relationship between the model error and the number of trees.

(S8C) The forest plot showed the results of the multifactorial COX regression analysis.

## Supplementary Table1

Supplementary Table1: 177 OS-related genes with a filtering threshold of P value less than 0.01 by univariate Cox regression analysis

| Gene    | HR       | z        | p value  | Confidence intervals |          |
|---------|----------|----------|----------|----------------------|----------|
|         |          |          |          | lower                | upper    |
| MCM6    | 2.02167  | 3.793301 | 0.000149 | 1.405247             | 2.908492 |
| KNSTRN  | 2.575466 | 4.100828 | 4.12E-05 | 1.638664             | 4.047825 |
| S100B   | 0.743348 | -3.82619 | 0.00013  | 0.638573             | 0.865315 |
| DHFR    | 3.678661 | 5.929789 | 3.03E-09 | 2.391736             | 5.658044 |
| RFC4    | 2.700155 | 4.374802 | 1.22E-05 | 1.7303               | 4.213626 |
| HMGB2   | 2.31609  | 4.223919 | 2.40E-05 | 1.568567             | 3.419853 |
| CCNA2   | 2.20543  | 4.629157 | 3.67E-06 | 1.577828             | 3.082668 |
| OIP5    | 2.008274 | 4.087976 | 4.35E-05 | 1.437592             | 2.8055   |
| SPC25   | 2.258719 | 5.217977 | 1.81E-07 | 1.663203             | 3.067462 |
| CCNB1   | 2.289225 | 4.888488 | 1.02E-06 | 1.642393             | 3.190804 |
| BLM     | 2.133814 | 4.767652 | 1.86E-06 | 1.562577             | 2.91388  |
| ANGPTL7 | 0.802243 | -3.66677 | 0.000246 | 0.713108             | 0.902519 |
| KIF4A   | 2.124181 | 4.505143 | 6.63E-06 | 1.530547             | 2.94806  |
| PLK4    | 2.149392 | 4.301442 | 1.70E-05 | 1.516684             | 3.046044 |
| GMNN    | 2.538967 | 4.173264 | 3.00E-05 | 1.63912              | 3.932814 |
| RMI2    | 1.828571 | 3.820673 | 0.000133 | 1.341687             | 2.492139 |
| ERCC6L  | 2.298243 | 5.21433  | 1.84E-07 | 1.680948             | 3.142227 |
| PCNA    | 2.268688 | 3.896448 | 9.76E-05 | 1.502503             | 3.42558  |
| RACGAP1 | 2.100491 | 3.392136 | 0.000694 | 1.367996             | 3.225199 |
| UBE2T   | 3.038879 | 5.175727 | 2.27E-07 | 1.994884             | 4.629234 |
| FANCI   | 2.199865 | 4.813392 | 1.48E-06 | 1.595791             | 3.032608 |
| DSCC1   | 2.04736  | 4.106247 | 4.02E-05 | 1.454311             | 2.882248 |
| ECT2    | 1.970036 | 3.887674 | 0.000101 | 1.399637             | 2.772892 |
| NEIL3   | 1.995585 | 4.551475 | 5.33E-06 | 1.482018             | 2.687119 |
| PLP1    | 0.817332 | -2.95665 | 0.00311  | 0.715036             | 0.934264 |
| CDC6    | 2.256116 | 4.731184 | 2.23E-06 | 1.610557             | 3.160434 |
| AURKA   | 2.525019 | 4.997669 | 5.80E-07 | 1.755926             | 3.630972 |
| VRK1    | 2.339656 | 4.509836 | 6.49E-06 | 1.617035             | 3.385203 |
| SGO2    | 2.080234 | 3.754077 | 0.000174 | 1.419153             | 3.049265 |
| DEPDC1B | 1.755407 | 3.876688 | 0.000106 | 1.320767             | 2.333081 |
| CENPA   | 2.117897 | 4.992028 | 5.97E-07 | 1.577424             | 2.843553 |
| CEP152  | 1.9733   | 4.813503 | 1.48E-06 | 1.496223             | 2.602496 |
| CENPF   | 1.893485 | 4.641963 | 3.45E-06 | 1.446087             | 2.479302 |
| POLE2   | 1.969096 | 4.119224 | 3.80E-05 | 1.426435             | 2.718203 |
| MELK    | 1.956134 | 3.834338 | 0.000126 | 1.388184             | 2.75645  |
| MAD2L1  | 1.689853 | 3.876306 | 0.000106 | 1.296112             | 2.203207 |
| TYMS    | 1.984546 | 4.032728 | 5.51E-05 | 1.422308             | 2.769038 |

|           |          |          |          |          |          |
|-----------|----------|----------|----------|----------|----------|
| FBXO5     | 1.943087 | 3.464588 | 0.000531 | 1.334407 | 2.829411 |
| RRM1      | 2.229627 | 3.607913 | 0.000309 | 1.442309 | 3.446721 |
| CENPE     | 2.302164 | 4.710185 | 2.47E-06 | 1.627223 | 3.257058 |
| ARHGAP11A | 1.818816 | 3.724449 | 0.000196 | 1.327629 | 2.491729 |
| KIF15     | 1.705447 | 3.820852 | 0.000133 | 1.29692  | 2.242658 |
| CENPU     | 1.948694 | 4.340957 | 1.42E-05 | 1.441859 | 2.633688 |
| KIF11     | 2.08023  | 4.071201 | 4.68E-05 | 1.462062 | 2.959763 |
| CDK1      | 1.65246  | 3.987233 | 6.68E-05 | 1.290941 | 2.115219 |
| RAD51     | 1.870139 | 3.795194 | 0.000148 | 1.353534 | 2.583917 |
| FEN1      | 2.342345 | 5.044377 | 4.55E-07 | 1.682771 | 3.260443 |
| RTKN2     | 1.71383  | 3.585837 | 0.000336 | 1.276687 | 2.300651 |
| RNASEH2A  | 2.56279  | 4.862349 | 1.16E-06 | 1.753739 | 3.74508  |
| NCAPH     | 1.866506 | 3.974539 | 7.05E-05 | 1.372071 | 2.539114 |
| CENPH     | 2.007096 | 4.09248  | 4.27E-05 | 1.437681 | 2.802035 |
| KIF18A    | 2.098483 | 4.47714  | 7.56E-06 | 1.516996 | 2.902864 |
| GINS2     | 1.744308 | 3.615957 | 0.000299 | 1.290196 | 2.358255 |
| POLA2     | 1.971709 | 3.872943 | 0.000108 | 1.398405 | 2.780052 |
| NUF2      | 1.927533 | 4.200865 | 2.66E-05 | 1.419158 | 2.61802  |
| CDC25A    | 1.673885 | 3.200258 | 0.001373 | 1.220976 | 2.294797 |
| CHAF1A    | 2.002975 | 3.942633 | 8.06E-05 | 1.418098 | 2.829075 |
| CDKN3     | 2.531475 | 5.065255 | 4.08E-07 | 1.767222 | 3.626236 |
| NUSAP1    | 1.909215 | 3.799831 | 0.000145 | 1.367695 | 2.665144 |
| NCAPG     | 2.212967 | 5.273263 | 1.34E-07 | 1.647232 | 2.973002 |
| NDC80     | 1.995975 | 3.975136 | 7.03E-05 | 1.419587 | 2.806393 |
| EXO1      | 1.91702  | 4.737728 | 2.16E-06 | 1.464556 | 2.509269 |
| KLF9      | 0.664198 | -2.8385  | 0.004533 | 0.500721 | 0.881048 |
| PTTG1     | 2.16725  | 4.516955 | 6.27E-06 | 1.549365 | 3.031546 |
| TICRR     | 1.942603 | 4.636978 | 3.54E-06 | 1.467201 | 2.572046 |
| MCM2      | 1.823857 | 3.735594 | 0.000187 | 1.330626 | 2.499916 |
| TACC3     | 2.164676 | 4.769228 | 1.85E-06 | 1.576013 | 2.973214 |
| MCM10     | 2.021374 | 4.364983 | 1.27E-05 | 1.473687 | 2.772605 |
| ASPM      | 1.863471 | 4.45892  | 8.24E-06 | 1.417423 | 2.449885 |
| BUB1B     | 1.926768 | 4.059641 | 4.91E-05 | 1.403835 | 2.644496 |
| ANLN      | 1.832232 | 3.451479 | 0.000558 | 1.299104 | 2.584145 |
| KNTC1     | 2.073662 | 4.299852 | 1.71E-05 | 1.487175 | 2.891437 |
| CENPW     | 2.655338 | 4.986382 | 6.15E-07 | 1.808897 | 3.897856 |
| BUB1      | 2.286531 | 4.607167 | 4.08E-06 | 1.608338 | 3.2507   |
| CEP55     | 2.023669 | 4.32724  | 1.51E-05 | 1.470543 | 2.784846 |
| AURKB     | 1.583747 | 3.302491 | 0.000958 | 1.205525 | 2.080633 |
| TPX2      | 2.059223 | 4.208209 | 2.57E-05 | 1.470946 | 2.88277  |
| CDC25C    | 2.025894 | 4.269258 | 1.96E-05 | 1.465051 | 2.801436 |
| MKI67     | 1.491107 | 2.970881 | 0.002969 | 1.145621 | 1.940783 |
| TTK       | 1.682941 | 3.338137 | 0.000843 | 1.23975  | 2.284566 |

|        |          |          |          |          |          |
|--------|----------|----------|----------|----------|----------|
| CENPK  | 1.75677  | 3.62144  | 0.000293 | 1.295008 | 2.383183 |
| SKA3   | 1.902108 | 4.095139 | 4.22E-05 | 1.39827  | 2.587494 |
| KIF2C  | 1.716761 | 3.356809 | 0.000788 | 1.252184 | 2.353702 |
| ESCO2  | 1.576933 | 3.163607 | 0.001558 | 1.189217 | 2.091054 |
| POLD1  | 3.269511 | 5.05995  | 4.19E-07 | 2.066325 | 5.17329  |
| CDCA7  | 1.776951 | 3.999736 | 6.34E-05 | 1.340691 | 2.355169 |
| RRM2   | 1.514068 | 2.825426 | 0.004722 | 1.135483 | 2.018879 |
| KIF20A | 1.91461  | 4.10775  | 4.00E-05 | 1.404394 | 2.610186 |
| GTSE1  | 1.803093 | 3.492819 | 0.000478 | 1.295257 | 2.510039 |
| E2F1   | 1.957875 | 4.35023  | 1.36E-05 | 1.446517 | 2.650005 |
| PBK    | 1.547269 | 3.06743  | 0.002159 | 1.170687 | 2.044988 |
| CDCA2  | 1.998605 | 4.292356 | 1.77E-05 | 1.456833 | 2.741852 |
| KIF23  | 2.191568 | 4.198558 | 2.69E-05 | 1.519443 | 3.161008 |
| PIMREG | 1.607558 | 3.293279 | 0.00099  | 1.211905 | 2.132381 |
| ZWINT  | 1.907133 | 3.764198 | 0.000167 | 1.36267  | 2.66914  |
| POC1A  | 2.339188 | 4.53645  | 5.72E-06 | 1.620359 | 3.376905 |
| CHEK1  | 1.904677 | 4.910626 | 9.08E-07 | 1.472777 | 2.463233 |
| HMMR   | 1.823786 | 3.791949 | 0.000149 | 1.336851 | 2.488082 |
| POLQ   | 1.763025 | 3.832167 | 0.000127 | 1.319196 | 2.356175 |
| HMGB3  | 1.769509 | 3.477775 | 0.000506 | 1.282835 | 2.440814 |
| ENDOG  | 1.766782 | 3.154596 | 0.001607 | 1.240529 | 2.516278 |
| CENPN  | 2.142787 | 4.457943 | 8.27E-06 | 1.532717 | 2.995684 |
| CDC45  | 1.976784 | 4.374156 | 1.22E-05 | 1.45662  | 2.6827   |
| MND1   | 2.308266 | 5.692445 | 1.25E-08 | 1.730625 | 3.078709 |
| PLK1   | 2.169357 | 4.189266 | 2.80E-05 | 1.510001 | 3.116626 |
| CENPM  | 2.032455 | 4.092251 | 4.27E-05 | 1.447091 | 2.854606 |
| CDCA8  | 1.732925 | 3.526363 | 0.000421 | 1.27663  | 2.352309 |
| KIFC1  | 1.761941 | 3.596577 | 0.000322 | 1.29401  | 2.399081 |
| CDC20  | 2.005704 | 3.933399 | 8.38E-05 | 1.417918 | 2.837152 |
| SAPCD2 | 1.733565 | 4.222865 | 2.41E-05 | 1.34289  | 2.237895 |
| DIAPH3 | 1.952516 | 3.982223 | 6.83E-05 | 1.404657 | 2.714057 |
| SPC24  | 1.652999 | 3.872976 | 0.000108 | 1.281779 | 2.131728 |
| E2F3   | 2.744449 | 5.925846 | 3.11E-09 | 1.965336 | 3.832424 |
| DTL    | 1.83897  | 3.787014 | 0.000152 | 1.341666 | 2.520605 |
| DLGAP5 | 2.000159 | 4.21092  | 2.54E-05 | 1.448554 | 2.761813 |
| E2F8   | 1.774091 | 3.909915 | 9.23E-05 | 1.330973 | 2.364735 |
| UBE2C  | 1.737346 | 3.890618 | 1.00E-04 | 1.315345 | 2.294738 |
| KIF14  | 2.071223 | 4.444879 | 8.79E-06 | 1.502405 | 2.855399 |
| HJURP  | 1.83554  | 4.030253 | 5.57E-05 | 1.36613  | 2.466241 |
| UHRF1  | 2.079891 | 4.42322  | 9.72E-06 | 1.503538 | 2.87718  |
| PCLAF  | 1.815204 | 3.018614 | 0.002539 | 1.232557 | 2.673277 |
| SPAG5  | 1.723294 | 2.807017 | 0.005    | 1.178486 | 2.519963 |
| KIF18B | 1.754706 | 3.976815 | 6.98E-05 | 1.329991 | 2.315048 |



|          |          |          |          |          |          |
|----------|----------|----------|----------|----------|----------|
| TK1      | 1.802341 | 3.771902 | 0.000162 | 1.327084 | 2.447797 |
| BIRC5    | 1.79583  | 3.862028 | 0.000112 | 1.334217 | 2.417151 |
| FAM83D   | 1.874003 | 4.401827 | 1.07E-05 | 1.416825 | 2.478703 |
| PKMYT1   | 1.91357  | 3.536436 | 0.000406 | 1.33549  | 2.741877 |
| BCL6     | 0.6086   | -3.81739 | 0.000135 | 0.47163  | 0.785349 |
| MIA      | 0.499478 | -5.64212 | 1.68E-08 | 0.392452 | 0.635691 |
| PHF21B   | 2.112416 | 4.224017 | 2.40E-05 | 1.49307  | 2.988675 |
| HELLS    | 1.579788 | 5.023259 | 5.08E-07 | 1.32163  | 1.888372 |
| CDC45    | 1.881744 | 4.137923 | 3.50E-05 | 1.394802 | 2.538684 |
| MTFR2    | 2.597345 | 4.845595 | 1.26E-06 | 1.765465 | 3.821203 |
| FOXM1    | 1.836418 | 3.723759 | 0.000196 | 1.333622 | 2.528776 |
| UBE2S    | 3.628362 | 6.023329 | 1.71E-09 | 2.385521 | 5.518715 |
| HASPIN   | 1.782153 | 3.62604  | 0.000288 | 1.304076 | 2.435493 |
| E2F7     | 1.881033 | 4.361975 | 1.29E-05 | 1.416126 | 2.498566 |
| DIRAS3   | 0.739489 | -3.96532 | 7.33E-05 | 0.637012 | 0.858451 |
| MYBL2    | 1.969594 | 4.35787  | 1.31E-05 | 1.452045 | 2.671612 |
| ZNF695   | 1.584512 | 4.134434 | 3.56E-05 | 1.273894 | 1.970869 |
| TROAP    | 1.577749 | 3.020015 | 0.002528 | 1.173581 | 2.121107 |
| CALY     | 0.597026 | -4.97325 | 6.58E-07 | 0.487205 | 0.731601 |
| NEK2     | 1.634094 | 4.668152 | 3.04E-06 | 1.32963  | 2.008275 |
| HPDL     | 1.520504 | 3.707751 | 0.000209 | 1.218391 | 1.897528 |
| CKS2     | 2.642814 | 5.339713 | 9.31E-08 | 1.849887 | 3.775617 |
| TMEM97   | 1.795123 | 4.330518 | 1.49E-05 | 1.377504 | 2.339352 |
| CDT1     | 1.637941 | 3.850369 | 0.000118 | 1.274129 | 2.105636 |
| HLA-DRB1 | 0.722681 | -2.57649 | 0.009981 | 0.564476 | 0.925225 |
| FANCA    | 1.648934 | 3.442344 | 0.000577 | 1.240322 | 2.192159 |
| SPOCK2   | 0.552269 | -4.0579  | 4.95E-05 | 0.414581 | 0.735685 |
| HOXD10   | 1.200684 | 3.286858 | 0.001013 | 1.076627 | 1.339036 |
| SCG2     | 0.652166 | -4.58963 | 4.44E-06 | 0.543352 | 0.782772 |
| MAL      | 0.643809 | -3.9807  | 6.87E-05 | 0.518316 | 0.799685 |
| NMU      | 1.432406 | 5.999362 | 1.98E-09 | 1.273738 | 1.61084  |
| ODC1     | 1.652767 | 4.382626 | 1.17E-05 | 1.320154 | 2.069181 |
| CD74     | 0.73553  | -2.64991 | 0.008051 | 0.586048 | 0.923139 |
| ALK      | 1.605958 | 3.380298 | 0.000724 | 1.22024  | 2.1136   |
| FAXDC2   | 0.478755 | -5.76401 | 8.21E-09 | 0.372684 | 0.615015 |
| TRPV2    | 0.584399 | -4.59215 | 4.39E-06 | 0.464664 | 0.734987 |
| XKR4     | 0.669755 | -5.16636 | 2.39E-07 | 0.575272 | 0.779755 |
| RGS9     | 0.765217 | -4.16869 | 3.06E-05 | 0.674753 | 0.86781  |
| ARHGAP36 | 0.881985 | -2.73195 | 0.006296 | 0.805998 | 0.965136 |
| EPB41L3  | 0.760049 | -3.32663 | 0.000879 | 0.646602 | 0.893402 |
| CGNL1    | 0.6198   | -4.03777 | 5.40E-05 | 0.491371 | 0.781798 |
| CHD5     | 0.687134 | -5.60533 | 2.08E-08 | 0.602644 | 0.783468 |
| IGSF9    | 1.611114 | 3.426861 | 0.000611 | 1.226485 | 2.116364 |

|         |          |          |          |          |          |
|---------|----------|----------|----------|----------|----------|
| AKAP7   | 0.649615 | -4.26259 | 2.02E-05 | 0.532739 | 0.792133 |
| SV2B    | 0.770691 | -3.47122 | 0.000518 | 0.665288 | 0.892795 |
| KIRREL3 | 0.61406  | -4.65395 | 3.26E-06 | 0.500055 | 0.754056 |
| CREG2   | 0.626538 | -5.2883  | 1.23E-07 | 0.526856 | 0.745081 |
| AMIGO2  | 0.707917 | -4.33301 | 1.47E-05 | 0.605515 | 0.827638 |
| PTPRH   | 0.691221 | -5.26059 | 1.44E-07 | 0.602369 | 0.79318  |
| BIRC3   | 0.706718 | -3.5249  | 0.000424 | 0.582669 | 0.857177 |
| ASCL1   | 1.290406 | 3.479953 | 0.000502 | 1.117799 | 1.489667 |
| PRAME   | 1.291478 | 3.281255 | 0.001033 | 1.108491 | 1.504671 |
| TWIST1  | 1.383676 | 4.543715 | 5.53E-06 | 1.202813 | 1.591734 |
| FSTL5   | 0.833022 | -3.221   | 0.001277 | 0.745377 | 0.930972 |
|         |          |          |          |          |          |

## Supplementary Table2

**Supplementary Table2: Correspondence coefficients of risk model genes**

| Gene   | Coefficient         |
|--------|---------------------|
| UBE2S  | 0.241572950619027   |
| DHFR   | 0.150059604933231   |
| NMU    | 0.0984131905094628  |
| E2F3   | 0.011081949073031   |
| CHD5   | -0.0563058944686111 |
| MIA    | -0.117424610155511  |
| FAXDC2 | -0.0767325162975187 |
