# Supplementary material for: Identification of the molecular subtypes and construction of risk models in neuroblastoma
Source: PubMed Central journal article supplement (PMC10362029; doi:10.1038/s41598-023-35401-3), 2023-07-21
Supplement: 41598_2023_35401_MOESM3_ESM.pdf [file 41598_2023_35401_MOESM3_ESM.pdf]

| Gene     | Result of WGCNA<br>ModuleColor |
|----------|--------------------------------|
| AAAS     | grey                           |
| AATF     | grey                           |
| ABCB1    | grey                           |
| ABL1     | grey                           |
| ABRAXAS1 | turquoise                      |
| ABRAXAS2 | turquoise                      |
| ACTB     | grey                           |
| ACTL6A   | turquoise                      |
| ACTL6B   | grey                           |
| ACTR2    | grey                           |
| ACTR3    | turquoise                      |
| ACTR5    | grey                           |
| ACTR8    | turquoise                      |
| ACVR1    | grey                           |
| ACVR1B   | grey                           |
| ADAM17   | grey                           |
| ADAMTS1  | grey                           |
| ADARB1   | turquoise                      |
| ADCYAP1  | grey                           |
| AFAP1L2  | turquoise                      |
| AGO4     | grey                           |
| AHCTF1   | turquoise                      |
| AHR      | turquoise                      |
| AICDA    | grey                           |
| AIF1     | turquoise                      |
| AJUBA    | turquoise                      |
| AKAP8    | grey                           |
| AKAP8L   | grey                           |
| AKT1     | grey                           |
| AKT2     | grey                           |
| ALKBH4   | turquoise                      |
| ALMS1    | turquoise                      |
| ALOX15B  | grey                           |
| AMBRA1   | grey                           |
| ANAPC1   | turquoise                      |
| ANAPC10  | turquoise                      |
| ANAPC11  | grey                           |
| ANAPC13  | turquoise                      |
| ANAPC15  | grey                           |
| ANAPC16  | grey                           |
| ANAPC2   | grey                           |
| ANAPC4   | turquoise                      |
| ANAPC5   | turquoise                      |
| ANAPC7   | turquoise                      |
| ANGEL2   | turquoise                      |
| ANK3     | grey                           |
| ANKFN1   | grey                           |
| ANKK1    | grey                           |
| ANKLE1   | grey                           |
| ANKLE2   | turquoise                      |
| ANKRD17  | turquoise                      |
| ANKRD31  | grey                           |
| ANKRD53  | turquoise                      |
| ANLN     | turquoise                      |
| ANXA1    | grey                           |
| ANXA11   | turquoise                      |

|          |           |
|----------|-----------|
| APBB1    | grey      |
| APBB2    | grey      |
| APC      | turquoise |
| APEX1    | turquoise |
| APEX2    | turquoise |
| APP      | grey      |
| APPL1    | turquoise |
| APPL2    | turquoise |
| ARAP1    | turquoise |
| ARF1     | turquoise |
| ARF6     | grey      |
| ARHGEF10 | grey      |
| ARHGEF2  | grey      |
| ARID1A   | grey      |
| ARID1B   | grey      |
| ARID2    | turquoise |
| ARL2     | turquoise |
| ARL3     | grey      |
| ARL8A    | turquoise |
| ARL8B    | grey      |
| ARNTL    | grey      |
| ARPP19   | turquoise |
| ASAH2    | grey      |
| ASCL1    | turquoise |
| ASNS     | turquoise |
| ASPM     | turquoise |
| ASZ1     | grey      |
| ATAD5    | turquoise |
| ATF2     | turquoise |
| ATF5     | grey      |
| ATM      | grey      |
| ATP2B4   | grey      |
| ATR      | turquoise |
| ATRIP    | grey      |
| ATRX     | turquoise |
| AUNIP    | turquoise |
| AURKA    | turquoise |
| AURKAIP1 | turquoise |
| AURKB    | turquoise |
| AURKC    | grey      |
| AVEN     | grey      |
| AVPI1    | turquoise |
| AXIN2    | grey      |
| AZI2     | turquoise |
| BABAM1   | grey      |
| BABAM2   | grey      |
| BACH1    | turquoise |
| BAG6     | turquoise |
| BAK1     | turquoise |
| BANF1    | grey      |
| BANP     | grey      |
| BAP1     | grey      |
| BARD1    | turquoise |
| BAX      | grey      |
| BAZ1B    | turquoise |
| BBS4     | grey      |
| BCAT1    | turquoise |
| BCCIP    | turquoise |

|         |           |
|---------|-----------|
| BCL2    | grey      |
| BCL2L1  | turquoise |
| BCL2L11 | grey      |
| BCL6    | turquoise |
| BCL7A   | grey      |
| BCL7B   | grey      |
| BCL7C   | turquoise |
| BCR     | turquoise |
| BECN1   | grey      |
| BEX2    | grey      |
| BID     | grey      |
| BIN1    | turquoise |
| BIN3    | turquoise |
| BIRC2   | turquoise |
| BIRC3   | grey      |
| BIRC5   | turquoise |
| BIRC6   | turquoise |
| BIRC7   | turquoise |
| BIRC8   | grey      |
| BLCAP   | turquoise |
| BLM     | turquoise |
| BMP2    | grey      |
| BMP4    | grey      |
| BMP7    | grey      |
| BOD1    | turquoise |
| BOD1L2  | turquoise |
| BOLL    | grey      |
| BOP1    | grey      |
| BORA    | turquoise |
| BRCA1   | turquoise |
| BRCA2   | turquoise |
| BRCC3   | turquoise |
| BRD4    | grey      |
| BRD7    | turquoise |
| BRD8    | turquoise |
| BRDT    | grey      |
| BRINP1  | grey      |
| BRINP2  | grey      |
| BRINP3  | grey      |
| BRIP1   | turquoise |
| BRME1   | grey      |
| BRSK1   | grey      |
| BRSK2   | grey      |
| BTBD18  | grey      |
| BTC     | turquoise |
| BTG1    | grey      |
| BTG2    | turquoise |
| BTG3    | turquoise |
| BTG4    | grey      |
| BTN2A2  | turquoise |
| BTRC    | grey      |
| BUB1    | turquoise |
| BUB1B   | turquoise |
| BUB3    | turquoise |
| C2CD3   | turquoise |
| CABLES1 | grey      |
| CABLES2 | grey      |
| CACNB4  | turquoise |

|          |           |
|----------|-----------|
| CACUL1   | turquoise |
| CALM1    | grey      |
| CALM2    | grey      |
| CALM3    | turquoise |
| CALR     | turquoise |
| CAMK1    | grey      |
| CAMK2A   | turquoise |
| CAPN3    | turquoise |
| CASP2    | grey      |
| CASP3    | turquoise |
| CASP8AP2 | turquoise |
| CATSPERZ | grey      |
| CAV2     | grey      |
| CCAR1    | turquoise |
| CCAR2    | grey      |
| CCDC102B | grey      |
| CCDC124  | grey      |
| CCDC57   | turquoise |
| CCDC61   | turquoise |
| CCDC69   | turquoise |
| CCDC8    | turquoise |
| CCL2     | turquoise |
| CCN2     | grey      |
| CCNA1    | grey      |
| CCNA2    | turquoise |
| CCNB1    | turquoise |
| CCNB1IP1 | turquoise |
| CCNB2    | turquoise |
| CCNB3    | grey      |
| CCNC     | turquoise |
| CCND1    | turquoise |
| CCND2    | turquoise |
| CCND3    | turquoise |
| CCNDBP1  | grey      |
| CCNE1    | grey      |
| CCNE2    | turquoise |
| CCNF     | grey      |
| CCNG1    | turquoise |
| CCNG2    | turquoise |
| CCNH     | turquoise |
| CCNI     | turquoise |
| CCNJ     | turquoise |
| CCNJL    | turquoise |
| CCNK     | grey      |
| CCNL1    | turquoise |
| CCNL2    | grey      |
| CCNO     | turquoise |
| CCNP     | grey      |
| CCNQ     | turquoise |
| CCNT2    | turquoise |
| CCNY     | grey      |
| CCNYL1   | grey      |
| CCP110   | turquoise |
| CCPG1    | grey      |
| CCSAP    | grey      |
| CD28     | grey      |
| CD2AP    | turquoise |
| CDC123   | turquoise |

|          |           |
|----------|-----------|
| CDC14A   | grey      |
| CDC14B   | grey      |
| CDC14C   | grey      |
| CDC16    | turquoise |
| CDC20    | turquoise |
| CDC23    | turquoise |
| CDC25A   | turquoise |
| CDC25B   | grey      |
| CDC25C   | turquoise |
| CDC26    | grey      |
| CDC27    | turquoise |
| CDC34    | grey      |
| CDC37    | grey      |
| CDC42    | grey      |
| CDC45    | turquoise |
| CDC5L    | turquoise |
| CDC6     | turquoise |
| CDC7     | turquoise |
| CDC73    | turquoise |
| CDCA2    | turquoise |
| CDCA3    | grey      |
| CDCA5    | turquoise |
| CDCA8    | turquoise |
| CDK1     | turquoise |
| CDK10    | grey      |
| CDK11B   | grey      |
| CDK12    | turquoise |
| CDK13    | turquoise |
| CDK14    | grey      |
| CDK15    | grey      |
| CDK16    | grey      |
| CDK17    | turquoise |
| CDK18    | turquoise |
| CDK19    | turquoise |
| CDK2     | turquoise |
| CDK20    | grey      |
| CDK2AP1  | turquoise |
| CDK2AP2  | turquoise |
| CDK3     | grey      |
| CDK4     | grey      |
| CDK5     | grey      |
| CDK5R1   | grey      |
| CDK5R2   | turquoise |
| CDK5RAP1 | grey      |
| CDK5RAP2 | turquoise |
| CDK5RAP3 | grey      |
| CDK6     | turquoise |
| CDK7     | turquoise |
| CDK8     | turquoise |
| CDK9     | turquoise |
| CDKL1    | grey      |
| CDKL2    | grey      |
| CDKL3    | turquoise |
| CDKL5    | grey      |
| CDKN1A   | turquoise |
| CDKN1B   | turquoise |
| CDKN1C   | grey      |
| CDKN2A   | grey      |

|         |           |
|---------|-----------|
| CDKN2B  | grey      |
| CDKN2C  | grey      |
| CDKN2D  | grey      |
| CDKN3   | turquoise |
| CDT1    | turquoise |
| CEBPA   | turquoise |
| CECR2   | grey      |
| CENATAC | grey      |
| CENPA   | turquoise |
| CENPC   | turquoise |
| CENPE   | turquoise |
| CENPF   | turquoise |
| CENPH   | turquoise |
| CENPJ   | turquoise |
| CENPK   | turquoise |
| CENPQ   | turquoise |
| CENPS   | grey      |
| CENPT   | grey      |
| CENPV   | turquoise |
| CENPW   | turquoise |
| CENPX   | grey      |
| CEP120  | turquoise |
| CEP126  | grey      |
| CEP131  | grey      |
| CEP135  | turquoise |
| CEP152  | turquoise |
| CEP164  | turquoise |
| CEP192  | turquoise |
| CEP250  | turquoise |
| CEP295  | turquoise |
| CEP44   | turquoise |
| CEP55   | turquoise |
| CEP63   | turquoise |
| CEP68   | turquoise |
| CEP72   | turquoise |
| CEP76   | turquoise |
| CEP85   | grey      |
| CEP97   | turquoise |
| CETN1   | grey      |
| CETN2   | grey      |
| CETN3   | turquoise |
| CFL1    | grey      |
| CGREF1  | grey      |
| CGRRF1  | turquoise |
| CHAF1A  | turquoise |
| CHAF1B  | turquoise |
| CHAMP1  | turquoise |
| CHD3    | grey      |
| CHEK1   | turquoise |
| CHEK2   | turquoise |
| CHFR    | grey      |
| CHMP1A  | turquoise |
| CHMP1B  | grey      |
| CHMP2A  | grey      |
| CHMP2B  | grey      |
| CHMP3   | grey      |
| CHMP4A  | grey      |
| CHMP4B  | grey      |

|         |           |
|---------|-----------|
| CHMP4C  | grey      |
| CHMP5   | turquoise |
| CHMP6   | turquoise |
| CHMP7   | grey      |
| CHORDC1 | turquoise |
| CHTF18  | grey      |
| CHTF8   | grey      |
| CIB1    | turquoise |
| CINP    | grey      |
| CIT     | turquoise |
| CITED2  | grey      |
| CKAP2   | turquoise |
| CKAP5   | turquoise |
| CKS1B   | turquoise |
| CKS2    | turquoise |
| CLASP1  | grey      |
| CLASP2  | turquoise |
| CLIC1   | turquoise |
| CLIP1   | grey      |
| CLOCK   | turquoise |
| CLSPN   | turquoise |
| CLTA    | grey      |
| CLTC    | turquoise |
| CLTCL1  | grey      |
| CNPPD1  | turquoise |
| CNTD1   | grey      |
| CNTLN   | turquoise |
| CNTRL   | turquoise |
| CNTROB  | grey      |
| COPS5   | turquoise |
| CORT    | grey      |
| CPSF3   | turquoise |
| CRADD   | grey      |
| CREBL2  | grey      |
| CRLF3   | grey      |
| CRNN    | grey      |
| CROCC   | grey      |
| CRY1    | turquoise |
| CSNK1A1 | turquoise |
| CSNK1D  | grey      |
| CSNK2A1 | turquoise |
| CSNK2A2 | turquoise |
| CSPP1   | turquoise |
| CTBP1   | grey      |
| CTC1    | turquoise |
| CTCF    | turquoise |
| CTCFL   | grey      |
| CTDNEP1 | grey      |
| CTDP1   | turquoise |
| CTDSP1  | turquoise |
| CTDSP2  | grey      |
| CTDSPL  | grey      |
| CTNNB1  | grey      |
| CUL1    | turquoise |
| CUL2    | turquoise |
| CUL3    | turquoise |
| CUL4A   | turquoise |
| CUL4B   | turquoise |

|         |           |
|---------|-----------|
| CUL5    | grey      |
| CUL7    | grey      |
| CUL9    | grey      |
| CUZD1   | turquoise |
| CXCR5   | turquoise |
| CYLD    | grey      |
| CYP1A1  | grey      |
| CYP26B1 | grey      |
| CYP27B1 | grey      |
| DAB2IP  | turquoise |
| DACH1   | grey      |
| DACT1   | grey      |
| DAPK3   | turquoise |
| DBF4    | turquoise |
| DBF4B   | grey      |
| DCLRE1A | turquoise |
| DCTN1   | grey      |
| DCTN2   | grey      |
| DCTN3   | grey      |
| DCTN6   | turquoise |
| DCUN1D3 | grey      |
| DDB1    | turquoise |
| DDIAS   | turquoise |
| DDIT3   | grey      |
| DDR2    | grey      |
| DDRGK1  | turquoise |
| DDX11   | turquoise |
| DDX39B  | grey      |
| DDX3X   | turquoise |
| DDX4    | grey      |
| DEUP1   | grey      |
| DHCR24  | grey      |
| DIRAS3  | grey      |
| DIS3L2  | turquoise |
| DLG1    | turquoise |
| DLGAP5  | turquoise |
| DMAP1   | turquoise |
| DMC1    | turquoise |
| DMRT1   | turquoise |
| DMRTC2  | grey      |
| DMTF1   | turquoise |
| DNA2    | turquoise |
| DNM2    | turquoise |
| DNMT3A  | grey      |
| DNMT3L  | grey      |
| DONSON  | turquoise |
| DOT1L   | grey      |
| DPF1    | grey      |
| DPF2    | grey      |
| DPF3    | grey      |
| DR1     | turquoise |
| DRD2    | turquoise |
| DRD3    | grey      |
| DRG1    | turquoise |
| DSCC1   | turquoise |
| DSN1    | turquoise |
| DTL     | turquoise |
| DUSP1   | turquoise |



|          |           |
|----------|-----------|
| DUSP13   | grey      |
| DUSP3    | turquoise |
| DYNC1H1  | grey      |
| DYNC1LI1 | turquoise |
| DYNLT1   | turquoise |
| DYNLT3   | grey      |
| DYRK3    | grey      |
| E2F1     | turquoise |
| E2F2     | turquoise |
| E2F3     | turquoise |
| E2F4     | grey      |
| E2F5     | turquoise |
| E2F6     | turquoise |
| E2F7     | turquoise |
| E2F8     | turquoise |
| E4F1     | turquoise |
| ECD      | grey      |
| ECRG4    | turquoise |
| ECT2     | turquoise |
| EDN1     | turquoise |
| EDN3     | grey      |
| EDNRA    | grey      |
| EFHC1    | grey      |
| EFHC2    | grey      |
| EGF      | grey      |
| EGFR     | turquoise |
| EHMT2    | grey      |
| EID1     | turquoise |
| EIF2AK4  | turquoise |
| EIF4E    | turquoise |
| EIF4EBP1 | grey      |
| EIF4G1   | grey      |
| EIF4G2   | turquoise |
| EME1     | turquoise |
| EME2     | grey      |
| EML1     | turquoise |
| EML3     | turquoise |
| EML4     | grey      |
| ENSA     | grey      |
| ENTR1    | grey      |
| EP300    | turquoise |
| EP400    | grey      |
| EPB41    | turquoise |
| EPB41L2  | grey      |
| EPC1     | turquoise |
| EPC2     | turquoise |
| EPGN     | grey      |
| EPS8     | grey      |
| ERCC1    | grey      |
| ERCC2    | turquoise |
| ERCC3    | turquoise |
| ERCC4    | grey      |
| ERCC6    | turquoise |
| ERCC6L   | turquoise |
| EREG     | grey      |
| ERH      | turquoise |
| ESCO1    | turquoise |
| ESCO2    | turquoise |

|         |           |
|---------|-----------|
| ESPL1   | turquoise |
| ESRRB   | grey      |
| ESX1    | grey      |
| ETAA1   | turquoise |
| EVI2B   | turquoise |
| EVI5    | grey      |
| EXD1    | grey      |
| EXO1    | turquoise |
| EXOC1   | turquoise |
| EXOC2   | grey      |
| EXOC3   | grey      |
| EXOC4   | grey      |
| EXOC5   | turquoise |
| EXOC6   | turquoise |
| EXOC6B  | grey      |
| EXOC7   | grey      |
| EXOC8   | turquoise |
| EZH2    | turquoise |
| EZR     | grey      |
| FAM107A | turquoise |
| FAM110A | grey      |
| FAM32A  | grey      |
| FAM83D  | turquoise |
| FAM9A   | grey      |
| FAM9B   | grey      |
| FAM9C   | grey      |
| FANCA   | turquoise |
| FANCD2  | turquoise |
| FANCI   | turquoise |
| FANCM   | turquoise |
| FAP     | grey      |
| FBXL12  | grey      |
| FBXL15  | turquoise |
| FBXL17  | grey      |
| FBXL21P | grey      |
| FBXL22  | grey      |
| FBXL3   | grey      |
| FBXL6   | grey      |
| FBXL7   | grey      |
| FBXL8   | turquoise |
| FBXO31  | turquoise |
| FBXO4   | grey      |
| FBXO43  | turquoise |
| FBXO5   | turquoise |
| FBXO6   | turquoise |
| FBXO7   | grey      |
| FBXW11  | turquoise |
| FBXW5   | turquoise |
| FBXW7   | turquoise |
| FEM1B   | grey      |
| FEN1    | turquoise |
| FES     | turquoise |
| FGF10   | grey      |
| FGF2    | grey      |
| FGF8    | turquoise |
| FGFR2   | grey      |
| FHL1    | grey      |
| FIGN    | turquoise |

|            |           |
|------------|-----------|
| FIGNL1     | turquoise |
| FKBP6      | grey      |
| FLCN       | turquoise |
| FLNA       | turquoise |
| FMN2       | grey      |
| FOSL1      | grey      |
| FOXA1      | grey      |
| FOXC1      | grey      |
| FOXE3      | grey      |
| FOXG1      | grey      |
| FOXJ2      | turquoise |
| FOXJ3      | grey      |
| FOXM1      | turquoise |
| FOXN3      | turquoise |
| FOXO4      | turquoise |
| FSD1       | grey      |
| FZD3       | turquoise |
| FZD9       | turquoise |
| FZR1       | turquoise |
| GADD45A    | grey      |
| GADD45B    | turquoise |
| GADD45G    | grey      |
| GADD45GIP1 | grey      |
| GAK        | turquoise |
| GAS1       | grey      |
| GAS2       | grey      |
| GATA3      | grey      |
| GATA6      | grey      |
| GBF1       | grey      |
| GEM        | grey      |
| GEN1       | turquoise |
| GFI1       | turquoise |
| GFI1B      | grey      |
| GIGYF2     | turquoise |
| GINS1      | turquoise |
| GINS3      | turquoise |
| GIPC1      | turquoise |
| GIT1       | turquoise |
| GJA1       | grey      |
| GJC2       | turquoise |
| GLI1       | turquoise |
| GML        | turquoise |
| GMNN       | turquoise |
| GNAI1      | grey      |
| GNAI2      | turquoise |
| GNAI3      | turquoise |
| GOLGA2     | turquoise |
| GOLGA2P5   | grey      |
| GOLGA6B    | grey      |
| GOLGA8A    | grey      |
| GOLGA8B    | grey      |
| GOLGA8O    | grey      |
| GPB1       | turquoise |
| GPER1      | turquoise |
| GPNMB      | grey      |
| GPR132     | turquoise |
| GPR3       | grey      |
| GPSM1      | grey      |
| GPSM2      | turquoise |

|          |           |
|----------|-----------|
| GRK5     | grey      |
| GSPT1    | turquoise |
| GSPT2    | grey      |
| GTF2H1   | turquoise |
| GTPBP4   | turquoise |
| GTSE1    | turquoise |
| H1-8     | grey      |
| H2AX     | grey      |
| HACE1    | turquoise |
| HASPIN   | turquoise |
| HAUS1    | turquoise |
| HAUS2    | turquoise |
| HAUS3    | turquoise |
| HAUS4    | grey      |
| HAUS5    | turquoise |
| HAUS6    | turquoise |
| HAUS7    | grey      |
| HAUS8    | turquoise |
| HBP1     | grey      |
| HCFC1    | grey      |
| HDAC3    | grey      |
| HDAC8    | turquoise |
| HECA     | grey      |
| HECW2    | grey      |
| HELLS    | turquoise |
| HEPACAM  | turquoise |
| HEPACAM2 | grey      |
| HERC5    | grey      |
| HES1     | turquoise |
| HEXIM1   | turquoise |
| HEXIM2   | grey      |
| HFM1     | turquoise |
| HGF      | grey      |
| HHEX     | grey      |
| HINFP    | grey      |
| HIPK2    | grey      |
| HJURP    | turquoise |
| HLA-G    | turquoise |
| HMCN1    | grey      |
| HMG20B   | turquoise |
| HMGA2    | grey      |
| HNRNPU   | turquoise |
| HORMAD1  | grey      |
| HORMAD2  | grey      |
| HOXA13   | grey      |
| HOXC9    | grey      |
| HOXD10   | grey      |
| HPGD     | grey      |
| HRAS     | grey      |
| HSF1     | grey      |
| HSF2BP   | grey      |
| HSP90AB1 | turquoise |
| HSPA1A   | grey      |
| HSPA2    | grey      |
| HSPA8    | turquoise |
| HTRA2    | grey      |
| HTT      | grey      |
| HUS1     | grey      |

|         |           |
|---------|-----------|
| HUS1B   | turquoise |
| HYAL1   | grey      |
| ID2     | grey      |
| ID3     | turquoise |
| ID4     | grey      |
| IFFO1   | turquoise |
| IFNW1   | grey      |
| IGF1    | turquoise |
| IGF1R   | grey      |
| IGF2    | grey      |
| IHO1    | grey      |
| IK      | turquoise |
| IKZF1   | grey      |
| IL10    | grey      |
| IL1A    | grey      |
| IL1B    | turquoise |
| INCENP  | grey      |
| ING1    | grey      |
| ING2    | turquoise |
| ING3    | turquoise |
| ING4    | grey      |
| ING5    | grey      |
| INHA    | grey      |
| INHBA   | grey      |
| INIP    | turquoise |
| INO80   | turquoise |
| INO80B  | grey      |
| INO80C  | grey      |
| INO80D  | grey      |
| INO80E  | grey      |
| INS     | grey      |
| INSM1   | grey      |
| INSM2   | grey      |
| INSR    | grey      |
| INTS13  | turquoise |
| INTS3   | turquoise |
| INTS7   | turquoise |
| IPO5    | turquoise |
| IPO7    | turquoise |
| IQGAP1  | grey      |
| IQGAP3  | grey      |
| IRF1    | turquoise |
| IST1    | grey      |
| ITGB1   | grey      |
| ITGB3BP | turquoise |
| JADE1   | turquoise |
| JADE2   | turquoise |
| JADE3   | grey      |
| JTB     | turquoise |
| JUN     | grey      |
| JUNB    | turquoise |
| JUND    | turquoise |
| KANK2   | turquoise |
| KASH5   | grey      |
| KAT14   | turquoise |
| KAT2A   | grey      |
| KAT2B   | grey      |
| KAT7    | grey      |

|          |           |
|----------|-----------|
| KATNA1   | turquoise |
| KATNB1   | grey      |
| KCNA5    | turquoise |
| KCNH5    | grey      |
| KCTD11   | turquoise |
| KDM8     | grey      |
| KHDRBS1  | turquoise |
| KIAA0753 | turquoise |
| KIAA1614 | turquoise |
| KIF11    | turquoise |
| KIF13A   | grey      |
| KIF14    | turquoise |
| KIF15    | turquoise |
| KIF18A   | turquoise |
| KIF18B   | turquoise |
| KIF20A   | turquoise |
| KIF20B   | turquoise |
| KIF22    | turquoise |
| KIF23    | turquoise |
| KIF25    | grey      |
| KIF2A    | turquoise |
| KIF2B    | grey      |
| KIF2C    | turquoise |
| KIF3A    | grey      |
| KIF3B    | grey      |
| KIF4A    | turquoise |
| KIFC1    | turquoise |
| KIFC2    | grey      |
| KIZ      | turquoise |
| KLF11    | grey      |
| KLF4     | turquoise |
| KLHDC3   | grey      |
| KLHDC8B  | turquoise |
| KLHL13   | turquoise |
| KLHL18   | grey      |
| KLHL21   | turquoise |
| KLHL22   | grey      |
| KLHL42   | turquoise |
| KLHL9    | turquoise |
| KLK10    | turquoise |
| KMT2E    | grey      |
| KMT5A    | turquoise |
| KNL1     | turquoise |
| KNSTRN   | turquoise |
| KNTC1    | turquoise |
| KPNB1    | turquoise |
| KRT18    | grey      |
| L3MBTL1  | grey      |
| LATS1    | grey      |
| LATS2    | turquoise |
| LCMT1    | grey      |
| LEP      | grey      |
| LFNG     | turquoise |
| LGMN     | turquoise |
| LIF      | turquoise |
| LIG1     | turquoise |
| LIG3     | grey      |
| LIG4     | turquoise |

|           |           |
|-----------|-----------|
| LILRB1    | turquoise |
| LIMK2     | grey      |
| LIN54     | turquoise |
| LIN9      | turquoise |
| LLGL1     | grey      |
| LLGL2     | turquoise |
| LMLN      | grey      |
| LMNA      | turquoise |
| LPIN1     | grey      |
| LRP5      | grey      |
| LRP6      | turquoise |
| LRRCC1    | grey      |
| LSM10     | turquoise |
| LSM11     | grey      |
| LSM14A    | turquoise |
| LZTS1     | grey      |
| LZTS2     | turquoise |
| M1AP      | grey      |
| MACROH2A1 | turquoise |
| MAD1L1    | turquoise |
| MAD2L1    | turquoise |
| MAD2L1BP  | grey      |
| MAD2L2    | turquoise |
| MADD      | grey      |
| MAEA      | grey      |
| MAEL      | grey      |
| MAGEA4    | grey      |
| MAJIN     | grey      |
| MAP10     | turquoise |
| MAP1S     | turquoise |
| MAP2K6    | turquoise |
| MAP3K11   | turquoise |
| MAP3K20   | grey      |
| MAP3K8    | grey      |
| MAP4      | turquoise |
| MAP9      | grey      |
| MAPK1     | grey      |
| MAPK12    | grey      |
| MAPK13    | grey      |
| MAPK14    | turquoise |
| MAPK15    | turquoise |
| MAPK3     | turquoise |
| MAPK4     | grey      |
| MAPK6     | turquoise |
| MAPK7     | grey      |
| MAPRE1    | turquoise |
| MAPRE2    | grey      |
| MAPRE3    | turquoise |
| MARF1     | grey      |
| MARK4     | turquoise |
| MASTL     | turquoise |
| MAU2      | grey      |
| MBIP      | turquoise |
| MBLAC1    | turquoise |
| MBTD1     | turquoise |
| MCM2      | turquoise |
| MCM3      | turquoise |
| MCM4      | turquoise |

|          |           |
|----------|-----------|
| MCM5     | grey      |
| MCM6     | turquoise |
| MCM7     | turquoise |
| MCM8     | turquoise |
| MCMBP    | turquoise |
| MCMDC2   | grey      |
| MCPH1    | turquoise |
| MCRS1    | grey      |
| MCTS1    | turquoise |
| MDC1     | grey      |
| MDM1     | turquoise |
| MDM2     | grey      |
| MDM4     | turquoise |
| MEAF6    | grey      |
| MECOM    | grey      |
| MECP2    | grey      |
| MED1     | turquoise |
| MEI1     | turquoise |
| MEIOB    | grey      |
| MEIOC    | grey      |
| MEIS2    | grey      |
| MELK     | turquoise |
| MEN1     | grey      |
| MEPCE    | turquoise |
| METTL3   | grey      |
| METTL3   | turquoise |
| MICAL3   | grey      |
| MIIP     | turquoise |
| MIR137HG | grey      |
| MIS12    | turquoise |
| MIS18A   | turquoise |
| MIS18BP1 | turquoise |
| MISP     | grey      |
| MITD1    | turquoise |
| MKI67    | turquoise |
| MLF1     | grey      |
| MLH1     | turquoise |
| MLH3     | turquoise |
| MN1      | turquoise |
| MNAT1    | turquoise |
| MND1     | turquoise |
| MNS1     | turquoise |
| MNT      | turquoise |
| MOK      | grey      |
| MORF4L1  | turquoise |
| MORF4L2  | turquoise |
| MOS      | grey      |
| MOV10L1  | turquoise |
| MPLKIP   | turquoise |
| MRE11    | turquoise |
| MRGBP    | grey      |
| MRGPRX2  | grey      |
| MRNIP    | grey      |
| MRPL41   | turquoise |
| MS4A3    | grey      |
| MSH2     | turquoise |
| MSH4     | grey      |
| MSH6     | turquoise |



|         |           |
|---------|-----------|
| MSX1    | turquoise |
| MSX2    | grey      |
| MTA3    | turquoise |
| MTBP    | turquoise |
| MUC1    | turquoise |
| MUS81   | grey      |
| MX2     | grey      |
| MYB     | turquoise |
| MYBBP1A | turquoise |
| MYBL1   | turquoise |
| MYBL2   | turquoise |
| MYC     | turquoise |
| MYH10   | turquoise |
| MYH9    | turquoise |
| MYO16   | grey      |
| MYO19   | turquoise |
| MYOCD   | grey      |
| MYOG    | turquoise |
| MZT1    | turquoise |
| NAA10   | grey      |
| NAA50   | turquoise |
| NABP1   | grey      |
| NABP2   | grey      |
| NACC2   | turquoise |
| NAE1    | turquoise |
| NANOS3  | grey      |
| NASP    | turquoise |
| NAT10   | grey      |
| NBN     | turquoise |
| NCAPD2  | turquoise |
| NCAPD3  | turquoise |
| NCAPG   | turquoise |
| NCAPG2  | turquoise |
| NCAPH   | turquoise |
| NCAPH2  | grey      |
| NCOR1   | turquoise |
| NDC1    | turquoise |
| NDC80   | turquoise |
| NDE1    | grey      |
| NDEL1   | turquoise |
| NEDD1   | turquoise |
| NEDD9   | grey      |
| NEK1    | turquoise |
| NEK10   | grey      |
| NEK11   | grey      |
| NEK2    | turquoise |
| NEK3    | turquoise |
| NEK4    | turquoise |
| NEK6    | turquoise |
| NEK7    | grey      |
| NEK9    | turquoise |
| NES     | grey      |
| NEUROG1 | grey      |
| NF2     | grey      |
| NFRKB   | grey      |
| NIN     | grey      |
| NIPBL   | turquoise |
| NKX3-1  | turquoise |

|          |           |
|----------|-----------|
| NLE1     | grey      |
| NLRP5    | grey      |
| NME6     | grey      |
| NOLC1    | turquoise |
| NOP53    | grey      |
| NOX5     | grey      |
| NPAT     | turquoise |
| NPM1     | turquoise |
| NPM2     | grey      |
| NPPC     | grey      |
| NPR2     | grey      |
| NR2E1    | grey      |
| NR2F2    | turquoise |
| NR3C1    | grey      |
| NR4A1    | turquoise |
| NRDE2    | turquoise |
| NSFL1C   | grey      |
| NSL1     | turquoise |
| NSMCE2   | turquoise |
| NSUN2    | turquoise |
| NTMT1    | grey      |
| NUBP1    | grey      |
| NUDC     | turquoise |
| NUDT15   | turquoise |
| NUDT16   | grey      |
| NUF2     | turquoise |
| NUMA1    | grey      |
| NUP214   | turquoise |
| NUP37    | turquoise |
| NUP43    | turquoise |
| NUP62    | turquoise |
| NUP88    | turquoise |
| NUPR1    | turquoise |
| NUSAP1   | turquoise |
| OBSL1    | grey      |
| ODF2     | grey      |
| OFD1     | turquoise |
| OIP5     | turquoise |
| OOEP     | grey      |
| OPN1LW   | grey      |
| OPN1MW   | grey      |
| OR1A2    | grey      |
| ORC1     | turquoise |
| OSGIN2   | grey      |
| OVOL1    | grey      |
| P3H4     | grey      |
| PABIR1   | grey      |
| PAF1     | grey      |
| PAFAH1B1 | grey      |
| PAGR1    | grey      |
| PAK4     | grey      |
| PARD3    | turquoise |
| PARD3B   | turquoise |
| PARD6A   | grey      |
| PARD6B   | turquoise |
| PARD6G   | grey      |
| PARP3    | turquoise |
| PAX6     | turquoise |

|         |           |
|---------|-----------|
| PAXIP1  | turquoise |
| PBK     | turquoise |
| PBRM1   | turquoise |
| PBX1    | grey      |
| PCID2   | turquoise |
| PCLAF   | turquoise |
| PCM1    | turquoise |
| PCNA    | turquoise |
| PCNP    | turquoise |
| PCNT    | turquoise |
| PDCD2L  | grey      |
| PDCD6IP | turquoise |
| PDE3A   | grey      |
| PDE4DIP | grey      |
| PDGFB   | turquoise |
| PDGFRB  | turquoise |
| PDIK1L  | turquoise |
| PDS5A   | turquoise |
| PDS5B   | turquoise |
| PDXP    | grey      |
| PELO    | grey      |
| PER2    | grey      |
| PES1    | grey      |
| PHACTR4 | grey      |
| PHB2    | turquoise |
| PHF13   | turquoise |
| PHF8    | grey      |
| PHGDH   | grey      |
| PHIP    | turquoise |
| PHOX2B  | grey      |
| PIBF1   | turquoise |
| PIDD1   | grey      |
| PIK3C3  | turquoise |
| PIK3R4  | turquoise |
| PIM1    | grey      |
| PIM2    | turquoise |
| PIM3    | turquoise |
| PIMREG  | turquoise |
| PIN1    | grey      |
| PINX1   | turquoise |
| PIWIL1  | grey      |
| PIWIL2  | grey      |
| PIWIL3  | grey      |
| PIWIL4  | grey      |
| PKD1    | grey      |
| PKD2    | turquoise |
| PKHD1   | grey      |
| PKIA    | grey      |
| PKMYT1  | turquoise |
| PKN2    | grey      |
| PKP4    | grey      |
| PLAGL1  | grey      |
| PLCB1   | grey      |
| PLCG2   | turquoise |
| PLD6    | grey      |
| PLEC    | turquoise |
| PLK1    | turquoise |
| PLK2    | grey      |

|          |           |
|----------|-----------|
| PLK3     | turquoise |
| PLK4     | turquoise |
| PLRG1    | turquoise |
| PLSCR1   | grey      |
| PMF1     | grey      |
| PML      | turquoise |
| PNPT1    | turquoise |
| POC1B    | turquoise |
| POC5     | turquoise |
| POGZ     | turquoise |
| POLA1    | turquoise |
| POLDIP2  | grey      |
| POLE     | grey      |
| POU4F1   | grey      |
| PPM1A    | turquoise |
| PPM1D    | turquoise |
| PPM1G    | grey      |
| PPME1    | grey      |
| PPP1CA   | grey      |
| PPP1CB   | turquoise |
| PPP1CC   | turquoise |
| PPP1R10  | grey      |
| PPP1R12A | turquoise |
| PPP1R13B | grey      |
| PPP1R15A | turquoise |
| PPP1R1C  | grey      |
| PPP1R35  | grey      |
| PPP1R9B  | turquoise |
| PPP2CA   | turquoise |
| PPP2CB   | grey      |
| PPP2R1A  | turquoise |
| PPP2R2D  | grey      |
| PPP2R3B  | grey      |
| PPP2R5B  | turquoise |
| PPP3CA   | turquoise |
| PPP5C    | grey      |
| PPP6C    | turquoise |
| PRAP1    | grey      |
| PRC1     | turquoise |
| PRCC     | grey      |
| PRDM11   | turquoise |
| PRDM5    | grey      |
| PRDM7    | grey      |
| PRDM9    | grey      |
| PRKACA   | turquoise |
| PRKCA    | grey      |
| PRKCB    | grey      |
| PRKCD    | turquoise |
| PRKCE    | grey      |
| PRKDC    | turquoise |
| PRMT2    | grey      |
| PRMT5    | turquoise |
| PRNP     | grey      |
| PROX1    | grey      |
| PRPF19   | grey      |
| PRPF40A  | turquoise |
| PRR11    | turquoise |
| PRR5     | turquoise |

|           |           |
|-----------|-----------|
| PSMA8     | grey      |
| PSMC3IP   | turquoise |
| PSMD10    | turquoise |
| PSMD13    | grey      |
| PSME1     | turquoise |
| PSME2     | grey      |
| PSME3     | grey      |
| PSMG2     | turquoise |
| PSRC1     | turquoise |
| PTCH1     | grey      |
| PTEN      | turquoise |
| PTGS2     | grey      |
| PTK6      | grey      |
| PTP4A1    | turquoise |
| PTPA      | turquoise |
| PTPN11    | turquoise |
| PTPN3     | grey      |
| PTPN6     | turquoise |
| PTPRC     | grey      |
| PTPRK     | grey      |
| PTTG1     | turquoise |
| PTTG2     | turquoise |
| PTTG3P    | turquoise |
| PUM1      | grey      |
| PYHIN1    | grey      |
| RAB11A    | turquoise |
| RAB11FIP3 | grey      |
| RAB11FIP4 | grey      |
| RAB35     | turquoise |
| RAB6C     | grey      |
| RABGAP1   | grey      |
| RACGAP1   | turquoise |
| RACK1     | grey      |
| RAD1      | turquoise |
| RAD17     | turquoise |
| RAD21     | turquoise |
| RAD23A    | grey      |
| RAD50     | turquoise |
| RAD51     | turquoise |
| RAD51AP1  | turquoise |
| RAD51B    | grey      |
| RAD51C    | turquoise |
| RAD51D    | grey      |
| RAD54B    | turquoise |
| RAD54L    | turquoise |
| RAD9A     | grey      |
| RAD9B     | turquoise |
| RAE1      | turquoise |
| RALA      | grey      |
| RALB      | grey      |
| RAN       | turquoise |
| RANBP1    | turquoise |
| RARA      | turquoise |
| RASA1     | turquoise |
| RASSF1    | grey      |
| RASSF2    | grey      |
| RASSF4    | turquoise |
| RB1       | turquoise |

|          |           |
|----------|-----------|
| RB1CC1   | turquoise |
| RBBP4    | turquoise |
| RBBP8    | turquoise |
| RBL1     | turquoise |
| RBL2     | turquoise |
| RBM14    | grey      |
| RBM38    | turquoise |
| RBM7     | turquoise |
| RCBTB1   | turquoise |
| RCC1     | turquoise |
| RCC2     | grey      |
| RDX      | turquoise |
| REC114   | turquoise |
| REC8     | grey      |
| RECQL5   | grey      |
| REEP3    | grey      |
| REEP4    | grey      |
| RFPL1    | grey      |
| RFWD3    | turquoise |
| RGCC     | turquoise |
| RGS14    | turquoise |
| RGS2     | grey      |
| RHEB     | grey      |
| RHNO1    | turquoise |
| RHOA     | grey      |
| RHOB     | turquoise |
| RHOC     | turquoise |
| RHOU     | grey      |
| RIDA     | turquoise |
| RIF1     | turquoise |
| RINT1    | turquoise |
| RIOK2    | turquoise |
| RMDN1    | grey      |
| RMI1     | turquoise |
| RMI2     | turquoise |
| RNASEH2B | turquoise |
| RNF112   | grey      |
| RNF167   | grey      |
| RNF2     | turquoise |
| RNF20    | turquoise |
| RNF212   | grey      |
| RNF4     | grey      |
| RNF40    | grey      |
| RNF8     | turquoise |
| ROCK1    | grey      |
| ROCK2    | turquoise |
| ROPN1B   | grey      |
| RPA1     | turquoise |
| RPA2     | grey      |
| RPA3     | turquoise |
| RPA4     | turquoise |
| RPL10L   | grey      |
| RPL23    | turquoise |
| RPL24    | grey      |
| RPL26    | turquoise |
| RPRD1B   | turquoise |
| RPRM     | grey      |
| RPS15A   | turquoise |

|          |           |
|----------|-----------|
| RPS27L   | grey      |
| RPS3     | grey      |
| RPS6     | grey      |
| RPS6KA1  | turquoise |
| RPS6KA2  | grey      |
| RPS6KA3  | grey      |
| RPS6KB1  | turquoise |
| RPTOR    | grey      |
| RRM1     | turquoise |
| RRM2     | turquoise |
| RRM2B    | grey      |
| RRP8     | grey      |
| RRS1     | grey      |
| RSPH1    | grey      |
| RTEL1    | grey      |
| RTF2     | grey      |
| RTKN     | turquoise |
| RTTN     | turquoise |
| RUNX3    | turquoise |
| RUVBL1   | turquoise |
| RUVBL2   | grey      |
| RXFP3    | turquoise |
| SAC3D1   | grey      |
| SAPCD2   | turquoise |
| SASS6    | turquoise |
| SBDS     | grey      |
| SCRIB    | grey      |
| SDCBP    | grey      |
| SDCCAG8  | grey      |
| SDE2     | grey      |
| SEH1L    | turquoise |
| SENP5    | turquoise |
| SENP6    | turquoise |
| SEPTIN1  | turquoise |
| SEPTIN10 | grey      |
| SEPTIN11 | turquoise |
| SEPTIN12 | grey      |
| SEPTIN14 | grey      |
| SEPTIN2  | turquoise |
| SEPTIN3  | grey      |
| SEPTIN4  | turquoise |
| SEPTIN5  | grey      |
| SEPTIN6  | grey      |
| SEPTIN7  | turquoise |
| SEPTIN8  | grey      |
| SEPTIN9  | grey      |
| SERTAD1  | turquoise |
| SETD2    | turquoise |
| SETDB2   | turquoise |
| SETMAR   | turquoise |
| SFN      | turquoise |
| SFPQ     | turquoise |
| SFRP1    | grey      |
| SGF29    | grey      |
| SGO1     | turquoise |
| SGO2     | turquoise |
| SGSM3    | turquoise |
| SH2B1    | turquoise |

|          |           |
|----------|-----------|
| SH3GLB1  | grey      |
| SHB      | turquoise |
| SHCBP1L  | grey      |
| SHOC1    | grey      |
| SIAH1    | turquoise |
| SIAH2    | grey      |
| SIK1     | turquoise |
| SIN3A    | grey      |
| SIPA1    | turquoise |
| SIRT1    | turquoise |
| SIRT2    | turquoise |
| SIRT7    | grey      |
| SIX3     | grey      |
| SKA1     | turquoise |
| SKA2     | turquoise |
| SKA3     | turquoise |
| SKIL     | turquoise |
| SKP2     | turquoise |
| SLC16A1  | turquoise |
| SLC25A31 | grey      |
| SLC26A8  | grey      |
| SLC2A8   | turquoise |
| SLC39A5  | grey      |
| SLC6A4   | grey      |
| SLC9A3R1 | turquoise |
| SLF1     | turquoise |
| SLF2     | turquoise |
| SLFN11   | grey      |
| SLX4     | grey      |
| SMARCA2  | grey      |
| SMARCA4  | turquoise |
| SMARCA5  | turquoise |
| SMARCA1  | turquoise |
| SMARCB1  | grey      |
| SMARCC1  | turquoise |
| SMARCC2  | grey      |
| SMARCD1  | grey      |
| SMARCD2  | grey      |
| SMARCD3  | turquoise |
| SMARCE1  | turquoise |
| SMC1A    | turquoise |
| SMC1B    | grey      |
| SMC2     | turquoise |
| SMC3     | turquoise |
| SMC4     | turquoise |
| SMC5     | turquoise |
| SMIM22   | grey      |
| SMOC2    | turquoise |
| SMPD3    | grey      |
| SND1     | grey      |
| SNX18    | turquoise |
| SNX33    | turquoise |
| SNX9     | grey      |
| SON      | turquoise |
| SOX15    | grey      |
| SOX2     | turquoise |
| SOX9     | grey      |
| SPAG5    | turquoise |



|         |           |
|---------|-----------|
| SPAG8   | grey      |
| SPAST   | turquoise |
| SPATA22 | grey      |
| SPC24   | turquoise |
| SPC25   | turquoise |
| SPDL1   | turquoise |
| SPDYA   | grey      |
| SPDYE1  | grey      |
| SPDYE3  | grey      |
| SPDYE4  | grey      |
| SPDYE5  | grey      |
| SPDYE6  | grey      |
| SPDYE7P | grey      |
| SPECC1L | grey      |
| SPHK1   | turquoise |
| SPICE1  | turquoise |
| SPIN1   | turquoise |
| SPIN2B  | grey      |
| SPIRE1  | turquoise |
| SPIRE2  | grey      |
| SPO11   | grey      |
| SPOUT1  | turquoise |
| SPRY1   | turquoise |
| SPRY2   | grey      |
| SPTBN1  | grey      |
| SRA1    | grey      |
| SRC     | turquoise |
| SRPK2   | grey      |
| SRSF5   | grey      |
| SSTR5   | grey      |
| SSX2IP  | turquoise |
| STAG1   | turquoise |
| STAG2   | turquoise |
| STAG3   | grey      |
| STAG3L1 | grey      |
| STAG3L3 | grey      |
| STAG3L4 | turquoise |
| STAMBP  | turquoise |
| STARD9  | grey      |
| STAT3   | turquoise |
| STAT5B  | grey      |
| STEAP3  | turquoise |
| STIL    | turquoise |
| STK10   | turquoise |
| STK11   | turquoise |
| STK33   | grey      |
| STK35   | grey      |
| STMN1   | turquoise |
| STOX1   | grey      |
| STRA8   | grey      |
| STRADA  | grey      |
| STRADB  | turquoise |
| STXBP4  | turquoise |
| SUGT1   | turquoise |
| SUN1    | grey      |
| SUN2    | turquoise |
| SUSD2   | turquoise |
| SUV39H1 | grey      |

|         |           |
|---------|-----------|
| SUV39H2 | turquoise |
| SVIL    | grey      |
| SYCE1   | grey      |
| SYCE3   | grey      |
| SYCP1   | grey      |
| SYCP2   | grey      |
| SYCP2L  | grey      |
| SYCP3   | grey      |
| SYF2    | grey      |
| TACC1   | turquoise |
| TACC2   | grey      |
| TACC3   | turquoise |
| TADA2A  | turquoise |
| TADA3   | grey      |
| TAF1    | turquoise |
| TAF10   | grey      |
| TAF1L   | turquoise |
| TAF2    | turquoise |
| TAF6    | grey      |
| TAL1    | turquoise |
| TAOK1   | grey      |
| TAOK2   | turquoise |
| TAOK3   | turquoise |
| TARDBP  | turquoise |
| TAS1R2  | grey      |
| TAS2R13 | grey      |
| TASOR   | turquoise |
| TBCD    | grey      |
| TBCE    | turquoise |
| TBRG1   | grey      |
| TBRG4   | grey      |
| TBX2    | grey      |
| TBX3    | grey      |
| TCIM    | turquoise |
| TDRD1   | grey      |
| TDRD12  | grey      |
| TDRD9   | grey      |
| TDRKH   | turquoise |
| TELO2   | turquoise |
| TENT4A  | turquoise |
| TENT4B  | turquoise |
| TENT5B  | turquoise |
| TERB1   | grey      |
| TERB2   | grey      |
| TERF1   | turquoise |
| TERF2   | grey      |
| TERT    | grey      |
| TESMIN  | grey      |
| TET2    | grey      |
| TEX11   | grey      |
| TEX12   | turquoise |
| TEX14   | grey      |
| TEX15   | turquoise |
| TEX19   | grey      |
| TFAP4   | grey      |
| TFDP1   | turquoise |
| TFDP2   | turquoise |
| TFDP3   | turquoise |

|           |           |
|-----------|-----------|
| TFPT      | turquoise |
| TGFA      | turquoise |
| TGFB1     | turquoise |
| TGFB2     | grey      |
| TGFBR1    | turquoise |
| TGM1      | grey      |
| THAP1     | turquoise |
| THAP5     | turquoise |
| THOC1     | turquoise |
| THOC5     | grey      |
| TICRR     | turquoise |
| TIMELESS  | turquoise |
| TIPIN     | turquoise |
| TIPRL     | turquoise |
| TLE6      | grey      |
| TLK1      | turquoise |
| TLK2      | turquoise |
| TM4SF5    | grey      |
| TMEM14B   | turquoise |
| TMEM250   | turquoise |
| TMEM67    | grey      |
| TMEM8B    | turquoise |
| TMOD3     | grey      |
| TMPRSS11A | grey      |
| TNF       | grey      |
| TNFAIP3   | turquoise |
| TNKS      | turquoise |
| TOGARAM1  | turquoise |
| TOGARAM2  | grey      |
| TOM1L1    | grey      |
| TOM1L2    | turquoise |
| TOP2A     | turquoise |
| TOP2B     | turquoise |
| TOP3A     | grey      |
| TOPBP1    | turquoise |
| TP53      | grey      |
| TP53BP1   | turquoise |
| TP53BP2   | turquoise |
| TP53I13   | turquoise |
| TP53INP1  | grey      |
| TP73      | turquoise |
| TPD52L1   | grey      |
| TPPP      | grey      |
| TPR       | turquoise |
| TPRA1     | turquoise |
| TPX2      | turquoise |
| TRAPPC12  | grey      |
| TREX1     | turquoise |
| TRIAP1    | turquoise |
| TRIM21    | turquoise |
| TRIM32    | grey      |
| TRIM35    | turquoise |
| TRIM36    | grey      |
| TRIM37    | turquoise |
| TRIM39    | grey      |
| TRIOBP    | turquoise |
| TRIP13    | turquoise |
| TRNP1     | turquoise |

|         |           |
|---------|-----------|
| TRRAP   | grey      |
| TSC1    | grey      |
| TSC2    | grey      |
| TSG101  | turquoise |
| TSPYL2  | turquoise |
| TTBK1   | turquoise |
| TTC19   | grey      |
| TTC28   | turquoise |
| TTI1    | turquoise |
| TTI2    | grey      |
| TTK     | turquoise |
| TTL     | grey      |
| TLL12   | grey      |
| TTN     | grey      |
| TTYH1   | turquoise |
| TUBA1A  | grey      |
| TUBA1B  | grey      |
| TUBA1C  | grey      |
| TUBA3C  | grey      |
| TUBA3D  | grey      |
| TUBA4A  | turquoise |
| TUBA8   | turquoise |
| TUBAL3  | grey      |
| TUBB    | grey      |
| TUBB1   | grey      |
| TUBB2A  | turquoise |
| TUBB2B  | grey      |
| TUBB3   | grey      |
| TUBB4A  | turquoise |
| TUBB4B  | grey      |
| TUBB6   | turquoise |
| TUBB8   | grey      |
| TUBD1   | turquoise |
| TUBE1   | turquoise |
| TUBG1   | grey      |
| TUBG2   | grey      |
| TUBGCP2 | grey      |
| TUBGCP3 | turquoise |
| TUBGCP4 | turquoise |
| TUBGCP5 | turquoise |
| TUBGCP6 | turquoise |
| TUSC2   | turquoise |
| TXLNG   | turquoise |
| TXNIP   | grey      |
| TXNL4A  | grey      |
| TXNL4B  | grey      |
| UBA3    | turquoise |
| UBB     | grey      |
| UBD     | grey      |
| UBE2B   | grey      |
| UBE2C   | turquoise |
| UBE2DNL | grey      |
| UBE2E2  | grey      |
| UBE2I   | grey      |
| UBE2L3  | grey      |
| UBE2S   | grey      |
| UBR2    | grey      |
| UBXN2B  | turquoise |

|          |           |
|----------|-----------|
| UCL5     | turquoise |
| UHMK1    | grey      |
| UHRF1    | turquoise |
| UHRF2    | turquoise |
| UIMC1    | turquoise |
| UNC119   | turquoise |
| UPF1     | grey      |
| URGCP    | turquoise |
| USH1C    | grey      |
| USP16    | turquoise |
| USP17L2  | turquoise |
| USP19    | grey      |
| USP2     | grey      |
| USP22    | grey      |
| USP26    | grey      |
| USP28    | turquoise |
| USP29    | grey      |
| USP3     | turquoise |
| USP33    | turquoise |
| USP37    | turquoise |
| USP39    | turquoise |
| USP44    | grey      |
| USP47    | turquoise |
| USP51    | grey      |
| USP8     | turquoise |
| USP9X    | turquoise |
| UTP14C   | turquoise |
| UVRAG    | grey      |
| UXT      | grey      |
| VASH1    | grey      |
| VCP      | grey      |
| VCPIP1   | grey      |
| VPS4A    | grey      |
| VPS4B    | grey      |
| VPS72    | grey      |
| VRK1     | turquoise |
| WAC      | turquoise |
| WAPL     | turquoise |
| WASHC5   | turquoise |
| WASL     | grey      |
| WBP2NL   | grey      |
| WDHD1    | turquoise |
| WDR12    | turquoise |
| WDR5     | grey      |
| WDR6     | grey      |
| WDR62    | grey      |
| WDR76    | turquoise |
| WEE1     | turquoise |
| WEE2-AS1 | grey      |
| WIZ      | grey      |
| WNT10B   | turquoise |
| WNT4     | turquoise |
| WNT5A    | grey      |
| WRAP73   | grey      |
| WRN      | turquoise |
| WTAP     | turquoise |
| XIAP     | grey      |
| XPC      | grey      |

|          |           |
|----------|-----------|
| XPO1     | turquoise |
| XRCC2    | turquoise |
| XRCC3    | grey      |
| YEATS2   | turquoise |
| YEATS4   | turquoise |
| YTHDC2   | turquoise |
| YTHDF2   | turquoise |
| YWHAE    | turquoise |
| YY1      | turquoise |
| YY1AP1   | grey      |
| ZBED3    | grey      |
| ZBED9    | turquoise |
| ZBTB17   | turquoise |
| ZBTB49   | turquoise |
| ZC3HC1   | turquoise |
| ZCWPW1   | grey      |
| ZFHX3    | grey      |
| ZFP36L1  | turquoise |
| ZFP36L2  | turquoise |
| ZFP42    | grey      |
| ZFYVE19  | turquoise |
| ZFYVE26  | grey      |
| ZMPSTE24 | grey      |
| ZMYND11  | turquoise |
| ZNF16    | turquoise |
| ZNF207   | turquoise |
| ZNF268   | turquoise |
| ZNF318   | grey      |
| ZNF324   | grey      |
| ZNF503   | grey      |
| ZNF655   | grey      |
| ZNF703   | turquoise |
| ZNF830   | turquoise |
| ZNRD2    | grey      |
| ZPR1     | grey      |
| ZW10     | turquoise |
| ZWILCH   | turquoise |
| ZWINT    | turquoise |
| ZZZ3     | turquoise |
| CREBBP   | grey      |
| GSK3B    | turquoise |
| HDAC1    | grey      |
| HDAC2    | turquoise |
| ORC2     | turquoise |
| ORC3     | turquoise |
| ORC4     | turquoise |
| ORC5     | turquoise |
| ORC6     | turquoise |
| RBX1     | turquoise |
| SKP1     | grey      |
| SMAD2    | turquoise |
| SMAD3    | grey      |
| SMAD4    | turquoise |
| TGFB3    | grey      |
| YWHAB    | grey      |
| YWHAG    | grey      |
| YWHAH    | grey      |
| YWHAQ    | turquoise |

YWHAZ grey

Gene:Name of Gene

ModuleColor:The module in which genes were divided
